# Supplementary material for: Thermal Proteome Profiling Identifies Oxidative-Dependent Inhibition of the Transcription of Major Oncogenes as a New Therapeutic Mechanism for Select Anticancer Compounds
Source: Oxford University Press journal article supplement (doi:10.1158/0008-5472.can-19-2069), 2020-02-04
Supplement: 00085472can192069-sup-225191_2_supp_5977289_q2syxh.xlsx [file 00085472can192069-sup-225191_2_supp_5977289_q2syxh.xlsx]

## Sheet: RITA
Analysis Type:	PANTHER Overrepresentation Test (Released 20171205)
Annotation Version and Release Date:	PANTHER version 13.1 Released 2018-02-03
Analyzed List:	Client Text Box Input (Homo sapiens)
Reference List:	Homo sapiens (all genes in database)
Test Type:	FISHER
PANTHER GO-Slim Biological Process	Homo sapiens - REFLIST (21042)	Input (143)	Expected	fold Enrichment	raw P-value	FDR
RNA splicing, via transesterification reactions (GO:0000375)	156	9	1.06	8.49	1.85e-06	0.000452
mRNA splicing, via spliceosome (GO:0000398)	178	9	1.21	7.44	5.18e-06	0.000632
mRNA processing (GO:0006397)	244	10	1.66	6.03	9.09e-06	0.00074
nuclear transport (GO:0051169)	694	14	4.72	2.97	0.000319	0.0194
intracellular protein transport (GO:0006886)	1570	23	10.67	2.16	0.00059	0.0206
protein transport (GO:0015031)	736	14	5	2.8	0.000565	0.023
RNA metabolic process (GO:0016070)	2012	27	13.67	1.97	0.00056	0.0273
transport (GO:0006810)	2797	33	19.01	1.74	0.00179	0.0438
localization (GO:0051179)	123	5	0.84	5.98	0.00178	0.0482
nucleobase-containing compound metabolic process (GO:0006139)	1701	23	11.56	1.99	0.00172	0.0525

## Sheet: AF
Analysis Type:	PANTHER Overrepresentation Test (Released 20171205)
Annotation Version and Release Date:	PANTHER version 13.1 Released 2018-02-03
Analyzed List:	Client Text Box Input (Homo sapiens)
Reference List:	Homo sapiens (all genes in database)
Test Type:	FISHER
PANTHER GO-Slim Biological Process	Homo sapiens - REFLIST (21042)	Input (191)	Expected	fold Enrichment	raw P-value	FDR
metabolic process (GO:0008152)	5878	99	53.36	1.86	6.05e-12	1.48e-09
primary metabolic process (GO:0044238)	4753	82	43.14	1.9	5.58e-10	6.81e-08
tRNA aminoacylation for protein translation (GO:0006418)	44	8	0.4	20.03	1.99e-08	1.21e-06
nitrogen compound metabolic process (GO:0006807)	2524	52	22.91	2.27	1.74e-08	1.42e-06
translation (GO:0006412)	198	13	1.8	7.23	6.42e-08	3.13e-06
nucleobase-containing compound metabolic process (GO:0006139)	2797	52	25.39	2.05	3.38e-07	1.37e-05
biosynthetic process (GO:0009058)	1745	38	15.84	2.4	5.07e-07	1.77e-05
mRNA processing (GO:0006397)	244	13	2.21	5.87	6.23e-07	1.9e-05
tRNA metabolic process (GO:0006399)	113	8	1.03	7.8	1.4e-05	0.000379
RNA metabolic process (GO:0016070)	1570	32	14.25	2.25	2.11e-05	0.000515
cellular process (GO:0009987)	8247	103	74.86	1.38	5.22e-05	0.00106
protein metabolic process (GO:0019538)	1583	31	14.37	2.16	5.18e-05	0.00115
catabolic process (GO:0009056)	1176	25	10.67	2.34	9.4e-05	0.00164
mRNA splicing, via spliceosome (GO:0000398)	178	8	1.62	4.95	0.000289	0.0047
cellular amino acid metabolic process (GO:0006520)	230	9	2.09	4.31	0.000326	0.00497
glycogen metabolic process (GO:0005977)	35	4	0.32	12.59	0.000408	0.00586
mRNA 3'-end processing (GO:0031124)	36	4	0.33	12.24	0.00045	0.0061
pteridine-containing compound metabolic process (GO:0042558)	16	3	0.15	20.66	0.000624	0.00802
RNA splicing, via transesterification reactions (GO:0000375)	156	7	1.42	4.94	0.000699	0.00852
phosphate-containing compound metabolic process (GO:0006796)	1595	28	14.48	1.93	0.000851	0.00989
mitochondrial translation (GO:0032543)	19	3	0.17	17.39	0.000973	0.0108
fatty acid beta-oxidation (GO:0006635)	20	3	0.18	16.53	0.00111	0.0118
mRNA polyadenylation (GO:0006378)	25	3	0.23	13.22	0.00199	0.0202
DNA replication (GO:0006260)	157	6	1.43	4.21	0.00362	0.034
coenzyme metabolic process (GO:0006732)	112	5	1.02	4.92	0.00416	0.035

## Sheet: Onc1
Analysis Type:	PANTHER Overrepresentation Test (Released 20171205)
Annotation Version and Release Date:	PANTHER version 13.1 Released 2018-02-03
Analyzed List:	Client Text Box Input (Homo sapiens)
Reference List:	Homo sapiens (all genes in database)
Test Type:	FISHER
PANTHER GO-Slim Biological Process	Homo sapiens - REFLIST (21042)	Input (193)	Expected	fold Enrichment	raw P-value	FDR
fatty acid beta-oxidation (GO:0006635)	5878	86	53.91	1.6	1.05e-06	0.000255
tRNA aminoacylation for protein translation (GO:0006418)	244	11	2.24	4.92	2.29e-05	0.00279
DNA recombination (GO:0006310)	2797	47	25.65	1.83	4.2e-05	0.00341
tRNA metabolic process (GO:0006399)	113	7	1.04	6.75	0.000115	0.00702
mRNA processing (GO:0006397)	1570	30	14.4	2.08	0.000155	0.00758
mRNA splicing, via spliceosome (GO:0000398)	2524	41	23.15	1.77	0.000322	0.0131
translation (GO:0006412)	4753	65	43.6	1.49	0.000507	0.0177
RNA metabolic process (GO:0016070)	1595	28	14.63	1.91	0.000946	0.0256
phosphate-containing compound metabolic process (GO:0006796)	20	3	0.18	16.35	0.00114	0.0279
nucleobase-containing compound metabolic process (GO:0006139)	44	4	0.4	9.91	0.000942	0.0287
nitrogen compound metabolic process (GO:0006807)	8247	98	75.64	1.3	0.00139	0.0309
metabolic process (GO:0008152)	52	4	0.48	8.39	0.00168	0.0315
primary metabolic process (GO:0044238)	178	7	1.63	4.29	0.00155	0.0315
cellular process (GO:0009987)	198	7	1.82	3.85	0.00276	0.0482
