# Supplementary material for: Thermal Proteome Profiling Identifies Oxidative-Dependent Inhibition of the Transcription of Major Oncogenes as a New Therapeutic Mechanism for Select Anticancer Compounds
Source: Oxford University Press journal article supplement (doi:10.1158/0008-5472.can-19-2069), 2020-02-04
Supplement: 00085472can192069-sup-225191_2_supp_5977290_q2syxh.xlsx [file 00085472can192069-sup-225191_2_supp_5977290_q2syxh.xlsx]

## Sheet: COMMON_logFC_FDR
		AF		ONC		RITA			upregulation	downregulation
Entrez ID	Gene Symbol	log2FC	FDR	log2FC	FDR	log2FC	FDR
467	ATF3	4.99338	2.77e-07	7.15576	2.20673e-08	5.84987	8.64e-08
1746	DLX2	5.21589	9.67e-08	3.37806	4.49896e-07	5.31152	3.06e-07
5366	PMAIP1	5.59135	1.2e-08	6.45797	4.97562e-09	4.80408	8.64e-08
1647	GADD45A	5.61006	1.2e-08	6.20914	6.47787e-09	4.71769	8.64e-08
1839	HBEGF	3.16361	2.35e-06	5.3484	6.40615e-08	4.4649	2.58e-07
22822	PHLDA1	2.22732	0.00031	2.68684	4.59125e-05	3.53568	2.77e-06
2114	ETS2	1.98747	0.00026	3.56392	2.81399e-06	3.50211	9.06e-06
5997	RGS2	3.31473	8.19e-06	1.84206	0.000191835	3.45445	1.57e-06
9518	GDF15	4.72048	2.56e-08	4.49688	2.45149e-08	3.44625	5.75e-07
23237	ARC	1.22147	0.0450586	1.36062	0.0190878	3.39063	8.02e-07
3725	JUN	2.14398	4.55e-06	2.81792	4.67616e-07	3.35231	1.13e-06
3976	LIF	2.25636	0.000115	1.18605	0.00422874	3.08921	1.38e-05
6167	RPL37	2.31644	1.06e-05	2.01173	1.30448e-05	3.0757	2.51e-06
23764	MAFF	1.03243	0.00635428	2.87929	4.30935e-06	2.93548	1.13e-05
55839	CENPN	-1.06597	0.000335	-1.68311	8.38809e-06	2.89194	1.64e-05
3133	HLA-E	2.95541	9.27e-07	3.98136	7.11812e-08	2.77	4.87e-06
29950	SERTAD1	3.13068	1.46e-06	2.54053	2.02327e-06	2.70207	2.01e-06
131583	FAM43A	1.98458	0.000444	2.56854	4.11246e-05	2.69226	1.96e-05
9935	MAFB	3.545	3.59e-06	3.23029	2.81399e-06	2.6693	2.71e-06
8614	STC2	1.38637	0.000134	4.63789	6.40615e-08	2.66553	1.52e-06
4808	NHLH2	1.70272	0.000732	0.854203	0.0271188	2.63138	0.000123
7763	ZFAND5	-0.945652	0.000571	1.03154	9.4116e-05	2.63105	3.1e-06
64061	TSPYL2	1.17735	0.00797063	1.19247	0.00477566	2.60541	9.69e-06
1543	CYP1A1	6.41283	1.2e-08	1.68945	2.13131e-05	2.59554	2.88e-06
6624	FSCN1	1.04218	0.00195683	1.41599	0.000142159	2.54385	8.74e-06
10204	NUTF2	2.23292	0.000126	3.28939	4.80752e-06	2.54053	1.7e-06
51278	IER5	1.92492	1.43e-05	1.92934	6.85212e-06	2.52579	4.8e-06
10614	HEXIM1	1.60476	0.000154	1.79811	3.63145e-05	2.49966	5.26e-06
84981	MIR22HG	2.7137	5.67e-05	1.44376	0.00198172	2.49359	1.85e-06
6535	SLC6A8	1.41709	0.000136	3.64682	2.42031e-07	2.47719	8.74e-06
25764	HYPK	0.924387	0.00214071	1.37145	8.56821e-05	2.42688	5.11e-05
7779	SLC30A1	1.66931	1.19e-05	1.92951	2.31244e-06	2.39521	2.34e-06
1983	EIF5	-1.00722	0.000265	2.08666	0.000167248	2.39518	8.76e-06
27042	UTP25	2.20094	6.67e-05	1.84215	0.000106359	2.36976	2.03e-05
80328	ULBP2	1.92967	0.000209	1.20814	0.00253591	2.34198	1.2e-05
6157	RPL27A	1.398	0.0134758	0.858486	0.00172188	2.29786	6.07e-05
90639	COX19	1.60795	0.000738	3.38661	2.79101e-06	2.29617	3.1e-06
1026	CDKN1A	3.67443	2.77e-07	2.82008	4.7542e-07	2.28712	3.92e-06
6303	SAT1	3.08582	1.16e-06	3.9487	1.16105e-07	2.28424	6.27e-06
26156	RSL1D1	2.62082	3.59e-06	4.65311	2.42031e-07	2.18052	5.22e-06
5912	RAP2B	0.844681	0.00140289	0.933016	0.000415251	2.16206	2.21e-05
90990	KIFC2	1.33345	0.0152142	1.70577	0.00230666	2.15782	5.71e-05
1545	CYP1B1	2.75552	5.68e-07	0.954333	0.000310473	2.14055	6.7e-06
9314	KLF4	3.09932	3.31e-06	2.08328	1.8233e-05	2.13942	2.34e-06
79957	PAQR6	0.799003	0.0325281	0.683338	0.0483163	2.11759	5.72e-05
219743	TYSND1	1.21087	0.0426194	1.35639	0.0173525	2.106	1.08e-05
54541	DDIT4	1.98539	7.5e-06	2.26215	1.56546e-06	2.06533	7.21e-05
57035	RSRP1	2.24172	1.25e-05	2.19838	6.93353e-06	2.05148	4.78e-06
90871	DMAC1	1.5929	0.00452872	2.23675	0.000291923	2.03532	1.01e-05
9939	RBM8A	2.32126	2.48e-06	1.21386	6.45348e-05	2.03519	1.97e-05
26007	TKFC	0.815654	0.0132858	0.879122	0.00572891	2.01373	1.82e-05
7832	BTG2	3.14825	1.66e-06	2.34125	4.07206e-06	2.00462	7.66e-06
55502	HES6	1.11332	0.00576882	2.85091	6.67252e-06	2.00371	3.96e-05
8349	HIST2H2BE	1.08367	0.00295492	1.33741	0.000438208	2.00176	1.11e-05
7280	TUBB2A	2.30956	2.52e-06	1.91432	3.26578e-06	2.00134	2.06e-05
27289	RND1	2.90665	8.88e-06	1.12138	0.00248564	1.98887	1.01e-05
122525	C14orf28	0.881503	0.0147276	1.65641	0.000162924	1.98735	5.13e-05
8870	IER3	-0.557872	0.0090624	-0.687589	0.0016021	1.96251	5.34e-06
1745	DLX1	2.73065	5.23e-06	1.13852	0.000821918	1.95673	3.27e-06
64783	RBM15	-0.796811	0.00110685	-1.47619	0.000197091	1.93188	3.19e-05
10628	TXNIP	1.25162	4.84e-05	1.68365	3.39114e-06	1.92519	6.27e-06
8061	FOSL1	2.67972	0.00013	1.47886	0.00355961	1.91866	8.28e-06
1265	CNN2	0.790866	0.0111598	0.683128	0.0168351	1.91557	4.02e-06
116842	LEAP2	1.656	0.000242	0.903329	0.00688857	1.91202	5.02e-05
51318	MRPL35	2.19169	0.000206	1.74285	0.000512357	1.90128	8.74e-06
64412	GZF1	1.02283	0.0389597	1.79968	4.30935e-06	1.86805	1.05e-05
64332	NFKBIZ	-1.12434	0.000881	-0.674898	0.012466	1.86693	6e-05
4616	GADD45B	2.02475	8.29e-06	2.4096	1.81715e-06	1.82529	7.75e-06
27113	BBC3	0.799886	0.00511959	1.55176	3.68816e-05	1.80267	6.66e-06
57184	FAM219B	3.24688	3.53e-06	4.92036	1.82072e-07	1.78569	6.44e-05
6234	RPS28	0.74883	0.0251245	0.797925	0.0124441	1.77402	6.21e-05
10602	CDC42EP3	1.35999	0.000713	2.31846	1.05523e-05	1.7499	0.000228
2296	FOXC1	0.766501	0.0153669	1.31056	0.000332865	1.7209	3.84e-05
5017	OVOL1	1.15343	0.000761	2.01505	9.65087e-06	1.71871	5.53e-06
7637	ZNF84	-1.49614	0.000293	-0.691737	0.0204298	1.70816	9.33e-06
54626	HES2	3.10438	1.74e-06	0.686568	0.0120489	1.67644	0.0002
57561	ARRDC3	1.97512	3.81e-05	3.84766	3.59671e-07	1.67314	2.38e-05
8744	TNFSF9	2.04583	0.000105	0.858663	0.014392	1.66713	1.01e-05
166336	PRICKLE2	2.2533	6.56e-06	1.92486	8.38809e-06	1.65431	7.47e-05
7089	TLE2	1.12359	0.00124081	1.82039	2.64053e-05	1.64496	1.17e-05
23558	WBP2	1.10862	0.0066769	2.39271	2.42196e-05	1.63985	5.22e-05
4487	MSX1	2.8851	1.03e-05	2.15168	3.47828e-05	1.6223	1.33e-05
6452	SH3BP2	1.19834	0.00284623	1.89232	7.67499e-05	1.6153	5.64e-05
10763	NES	0.91664	0.0430252	-0.523611	0.017432	1.60871	0.000891
122704	MRPL52	0.513392	0.0246488	1.35613	0.000391863	1.59949	0.000521
1958	EGR1	1.60161	0.000284	5.47404	9.15889e-08	1.59446	1.09e-05
91947	ARRDC4	1.27111	0.000468	2.39353	3.73969e-06	1.58576	7.15e-06
26471	NUPR1	2.07387	0.000844	6.97861	2.68914e-07	1.58147	2.02e-05
84707	BEX2	1.0638	0.000401	3.94023	7.76658e-08	1.57386	2.56e-05
24146	CLDN15	1.40249	0.00817902	1.90867	0.000729841	1.56315	0.00038
80700	UBXN6	0.985942	0.000347	1.70909	4.71299e-06	1.55993	5.82e-05
92703	TMEM183A	2.00373	2.01e-05	2.77404	1.29655e-06	1.5417	1.11e-05
6635	SNRPE	2.09703	0.000227	1.54778	0.00095325	1.53584	1.36e-05
26468	LHX6	1.11006	0.0186676	1.12717	0.0117431	1.53177	0.000207
6431	SRSF6	1.54497	2.03e-05	0.776548	0.00470244	1.52437	8.07e-06
29948	OSGIN1	2.70612	8.05e-06	0.94283	0.00421223	1.52025	1.87e-05
6228	RPS23	1.98612	6.55e-06	1.35965	3.58689e-05	1.5172	4.85e-05
51148	CERCAM	0.507558	0.0380148	0.533171	0.0212622	1.51099	0.000104
166	AES	0.619042	0.0236669	0.902962	0.00172148	1.51069	2.62e-05
1843	DUSP1	0.990534	0.00126795	1.8263	1.14676e-05	1.50936	2.84e-05
255783	INAFM1	1.74377	1.86e-05	2.89891	4.62167e-07	1.50082	1.47e-05
80235	PIGZ	1.84154	0.0196503	2.01956	0.00800308	1.49802	8.8e-05
79797	ZNF408	0.997786	0.00558152	2.43512	8.92318e-06	1.49754	7.88e-06
58473	PLEKHB1	0.825811	0.0163591	0.869981	0.00825604	1.48679	5.64e-05
53635	PTOV1	1.15381	0.000292	1.34637	5.41935e-05	1.47913	1.86e-05
83667	SESN2	1.3573	0.000248	2.30567	3.84429e-06	1.47843	3.52e-05
56271	BEX4	0.725736	0.0291377	2.51563	6.61361e-06	1.46988	2.45e-05
51646	YPEL5	1.52862	0.000171	1.94987	1.70395e-05	1.46644	2.43e-05
79041	TMEM38A	0.893663	0.0245398	1.05578	0.00670145	1.4653	1.24e-05
79877	DCAKD	1.00392	0.000682	1.6882	1.10053e-05	1.46522	1.5e-05
4122	MAN2A2	1.22736	0.00466439	1.25522	7.47606e-05	1.4532	0.00238
144811	LACC1	3.00277	1.87e-05	0.994293	0.012818	1.44878	8.81e-06
50604	IL20	-2.65271	0.000501	-3.44115	4.59089e-05	1.44732	2e-05
1508	CTSB	0.886823	0.000926	1.119	0.0025321	1.44558	1.65e-05
22809	ATF5	0.827441	0.0128463	-0.813112	0.00950177	1.4413	3.07e-05
90861	JPT2	1.74306	8.33e-05	2.53303	3.52002e-06	1.44068	0.000116
80344	DCAF11	0.550689	0.0159435	0.597071	0.00677213	1.4389	3.09e-05
56941	HMCES	1.66352	2.1e-05	0.888432	0.000730818	1.43238	2.56e-05
582	BBS1	0.821494	0.0216332	2.30396	1.79408e-05	1.42977	1.38e-05
55793	MINDY1	0.777133	0.0342058	1.45077	0.000547408	1.4168	6.9e-05
5792	PTPRF	1.55887	0.000209	1.25363	0.000479785	1.411	0.000421
6165	RPL35A	1.39758	0.000253	1.9853	1.25412e-05	1.40732	3.02e-05
130589	GALM	0.546919	0.0455386	-1.51483	0.000266589	1.40438	5.07e-05
26469	PTPN18	0.781419	0.0158885	0.567805	0.0353773	1.40371	2.62e-05
27067	STAU2	-0.78629	0.00523064	-1.67839	1.98432e-05	1.40098	3.63e-05
7067	THRA	-0.852161	0.0428752	-0.885151	0.0257859	1.3976	1.47e-05
25792	CIZ1	1.04552	0.000284	1.33614	2.82425e-05	1.39338	1.71e-05
51157	ZNF580	0.768569	0.0193925	2.04985	2.16214e-05	1.3924	2.01e-05
79680	RTL10	2.18008	8.33e-05	1.94677	8.68503e-05	1.3889	6.07e-05
23413	NCS1	0.838609	0.0410392	-0.440078	0.0480641	1.38498	1.31e-05
1107	CHD3	1.07807	0.000224	1.73903	4.74239e-06	1.38248	1.14e-05
1381	CRABP1	0.891566	0.0222485	1.03619	0.00656014	1.38121	0.00019
79154	DHRS11	0.826302	0.014353	0.725976	0.0195711	1.37534	5.68e-05
333	APLP1	0.815085	0.00494567	0.800071	0.00351281	1.36985	0.000226
9616	RNF7	0.439344	0.0316473	1.26101	2.54987e-05	1.36656	0.000118
84826	SFT2D3	0.995092	0.000608	1.81219	5.81344e-06	1.35474	1.19e-05
2878	GPX3	1.48143	9.5e-05	1.0251	0.000581571	1.3482	2.7e-05
57763	ANKRA2	1.54842	0.000141	1.52662	7.85161e-05	1.34389	6.4e-05
253980	KCTD13	1.52728	0.00111215	3.12235	5.07795e-06	1.34262	0.000307
146540	ZNF785	2.31486	5.23e-06	2.82749	7.6858e-07	1.33605	0.000176
10284	SAP18	1.41926	4.32e-05	1.85462	3.69907e-06	1.3354	1.78e-05
8751	ADAM15	0.983896	0.000818	0.816077	0.00162112	1.32248	3.98e-05
1263	PLK3	1.79278	0.00181084	2.04831	0.000434885	1.31988	0.00035
3398	ID2	0.959278	0.000508	1.08497	0.000117037	1.31772	3.51e-05
7593	MZF1	1.65413	0.000444	1.80427	0.000130692	1.31743	0.000881
118812	MORN4	0.820065	0.0120565	2.34797	7.6283e-06	1.30852	1.84e-05
60509	AGBL5	1.18792	0.00259532	1.27911	0.000962244	1.30721	2.85e-05
79145	CHCHD7	1.74895	0.000145	2.01386	2.84092e-05	1.30697	0.000109
3092	HIP1	-1.00584	0.024136	-1.292	0.00394973	1.30672	6.01e-05
55268	ECHDC2	0.775208	0.0140954	1.68542	5.73976e-05	1.30651	2.53e-05
57446	NDRG3	0.462135	0.0470331	-1.4215	0.00143463	1.30389	3.52e-05
118430	MUCL1	1.16443	0.0111395	1.03367	0.0144976	1.30025	2.04e-05
116151	FAM210B	2.30921	7.62e-06	2.22885	4.42484e-06	1.29963	2.06e-05
60681	FKBP10	0.820299	0.0113309	0.709342	0.0169846	1.29954	3.52e-05
22932	POMZP3	1.02915	0.00525486	1.98879	3.88784e-05	1.29821	3.02e-05
5993	RFX5	0.884712	0.00184095	0.705649	0.00466288	1.29787	3.52e-05
84153	RNASEH2C	1.37649	0.000195	1.37998	1.49709e-05	1.29734	0.000494
128439	SNHG11	0.697332	0.0389437	2.13459	2.23886e-05	1.28978	6.68e-05
1639	DCTN1	1.10534	0.00960541	1.60108	0.000218969	1.2871	0.000153
54855	TENT5C	2.02662	7.93e-05	1.31181	0.000763247	1.28658	0.000222
113235	SLC46A1	1.38863	0.00027	1.5736	6.07813e-05	1.281	6.95e-05
2353	FOS	2.31258	2.22e-06	5.79807	6.47787e-09	1.28038	4.25e-05
1857	DVL3	0.85923	0.00218725	1.63393	1.65818e-05	1.27862	2.52e-05
10608	MXD4	0.954443	0.00226665	1.67231	2.95125e-05	1.27774	4.9e-05
4000	LMNA	0.931532	0.00112373	1.21878	0.000425372	1.26179	4.25e-05
10127	ZNF263	1.23331	0.00026	2.9156	6.16302e-07	1.26145	5.15e-05
63926	ANKEF1	1.35145	0.000118	0.706983	0.0044715	1.26102	0.00176
10554	AGPAT1	1.0634	0.000301	1.87281	3.72413e-06	1.26073	6.74e-05
3169	FOXA1	-0.714871	0.0106064	-0.85467	0.00233733	1.25952	0.00035
9246	UBE2L6	0.705796	0.0119642	0.702365	0.00823333	1.25915	0.000173
51593	SRRT	0.585912	0.00622064	0.424382	0.0244336	1.25739	0.000102
9540	TP53I3	2.25551	2.48e-06	0.864513	0.000559453	1.25715	0.000426
59	ACTA2	3.12028	0.000117	1.6981	0.00347069	1.25644	0.000429
54205	CYCS	1.55945	0.000277	1.52183	0.0125235	1.25083	0.00318
4641	MYO1C	0.760163	0.00610293	1.00693	0.000617029	1.24955	1.99e-05
23524	SRRM2	-0.811881	0.0114344	0.59027	0.0167221	1.24144	3.9e-05
92305	TMEM129	1.24379	0.000945	2.33023	7.6864e-06	1.22903	9.98e-05
84264	HAGHL	1.7349	0.000101	2.46774	4.76365e-06	1.22887	7.19e-05
10809	STARD10	1.12349	0.0433118	-0.770668	0.00076448	1.22637	0.00131
11282	MGAT4B	1.1256	0.000138	1.34896	2.04787e-05	1.2222	4.35e-05
341	APOC1	1.04517	0.0117158	1.93802	6.51906e-06	1.22186	2.58e-05
142678	MIB2	2.71688	1.41e-06	3.04089	3.47411e-07	1.22096	7.94e-05
1797	DXO	1.03297	0.00567876	1.96498	9.29113e-06	1.21988	3.51e-05
10421	CD2BP2	1.1678	0.000572	1.40471	8.68503e-05	1.21152	0.000136
5036	PA2G4	2.01229	1.59e-05	1.58524	3.78638e-05	1.20946	0.000164
2907	GRINA	1.2078	0.00381071	1.32578	0.00129328	1.20868	2.01e-05
54884	RETSAT	1.79807	1.5e-05	2.35563	1.38432e-06	1.2052	0.000124
4968	OGG1	0.657628	0.0489078	1.38993	0.000400824	1.2037	0.0001
90864	SPSB3	0.627521	0.0121126	1.26039	8.11384e-05	1.20221	5.39e-05
326625	MMAB	1.11783	0.000823	1.62963	1.0238e-05	1.20131	4.64e-05
6430	SRSF5	0.535711	0.0189027	0.726115	0.00207045	1.20042	0.000103
51171	HSD17B14	1.09852	0.0224181	1.43109	0.000514686	1.19522	5.5e-05
3338	DNAJC4	0.868748	0.0193581	2.14203	3.6473e-05	1.19284	4.31e-05
9636	ISG15	1.07273	0.00251863	1.46855	0.00017723	1.19117	0.000208
79798	ARMC5	0.803545	0.0167674	1.01342	0.00283113	1.191	6.13e-05
8878	SQSTM1	0.531235	0.0107281	1.38073	0.00285103	1.18971	0.000161
5763	PTMS	1.4639	0.00197201	1.43387	0.00136081	1.18959	0.000441
5564	PRKAB1	1.47238	8.87e-05	2.1988	3.12176e-06	1.18801	2.22e-05
90313	TP53I13	0.657682	0.0443242	1.10085	0.00166881	1.18563	0.000289
64432	MRPS25	0.557994	0.0268327	1.64907	1.69037e-05	1.18331	5.47e-05
10406	WFDC2	0.770273	0.0447269	0.743888	0.038355	1.18265	0.00019
1845	DUSP3	0.889929	0.000757	1.34638	2.46341e-05	1.18189	7.55e-05
5268	SERPINB5	6.02645	1.2e-08	1.41924	4.36448e-05	1.18148	0.00398
11212	PLPBP	1.39849	4.31e-05	1.94957	2.45663e-06	1.18084	3.96e-05
22933	SIRT2	1.40978	0.00167087	0.963466	0.0106038	1.18021	0.000561
115908	CTHRC1	1.88031	0.000319	3.27345	4.2423e-06	1.17995	3.34e-05
8189	SYMPK	-1.1736	0.0126155	-0.969193	0.0238095	1.17936	0.000154
84890	ADO	0.960554	0.00268981	1.68629	3.51426e-05	1.17904	5.24e-05
81855	SFXN3	0.802557	0.0265241	0.907422	0.00946973	1.17627	7.49e-05
58526	MID1IP1	0.69322	0.0300931	1.74289	5.85918e-05	1.17534	0.000179
26515	TIMM10B	0.883788	0.00175795	2.52567	1.04939e-06	1.17471	2.41e-05
64651	CSRNP1	-1.19738	0.000837	-0.657304	0.0192338	1.17449	5.18e-05
155066	ATP6V0E2	0.971578	0.00146637	0.800694	0.00302631	1.17264	5.9e-05
10295	BCKDK	0.832557	0.0198305	1.13151	0.00216296	1.17147	2.94e-05
10493	VAT1	1.18859	0.000978	1.67438	5.32824e-05	1.16761	2.65e-05
126823	KLHDC9	0.618407	0.049627	1.65781	7.93323e-05	1.1646	0.000347
6160	RPL31	1.02278	0.00215485	1.0829	0.000885902	1.16443	2.32e-05
8519	IFITM1	1.0695	0.00172439	0.574918	0.0375703	1.16173	0.000141
126119	JOSD2	0.783714	0.0102982	0.952095	0.00203324	1.15838	8.34e-05
4796	TONSL	0.620885	0.0426348	1.42998	0.000176784	1.15727	0.00134
58476	TP53INP2	0.667493	0.023499	1.26896	0.000281656	1.15683	7.77e-05
4488	MSX2	1.14666	0.00101513	1.10693	0.000739057	1.15424	8.52e-05
23061	TBC1D9B	0.558039	0.0219053	0.55841	0.0113949	1.1487	0.000103
2232	FDXR	2.65048	9.47e-06	2.74555	3.69907e-06	1.14626	7.67e-05
37	ACADVL	0.865484	0.0094564	1.03741	0.00201237	1.14624	0.000743
27089	UQCRQ	0.439049	0.0378864	0.666132	0.0024921	1.14622	3.64e-05
81631	MAP1LC3B	1.20508	0.000142	3.43056	1.36506e-07	1.14618	5.67e-05
9556	ATP5MPL	0.738078	0.00254169	0.688499	0.00240615	1.14576	0.000113
6619	SNAPC3	0.897832	0.00318563	1.79289	1.79867e-05	1.14532	3.42e-05
4668	NAGA	0.841144	0.0262435	0.693233	0.0468495	1.14352	0.000187
1267	CNP	0.596846	0.021275	0.587435	0.0159723	1.13867	8.3e-05
7392	USF2	0.778859	0.00823013	1.46678	7.83415e-05	1.13236	4.97e-05
79035	NABP2	0.94858	0.00512257	1.10283	0.00123154	1.13225	2.57e-05
9536	PTGES	1.43464	0.000671	-1.19805	0.00126355	1.13213	2.41e-05
6919	TCEA2	0.803752	0.00965137	0.829682	0.0052488	1.12978	7.36e-05
200081	TXLNA	1.19693	0.0084826	2.19085	9.77759e-05	1.12895	0.00024
6722	SRF	0.468546	0.0485904	1.62168	1.39838e-05	1.12893	0.000154
10482	NXF1	0.85951	0.00437527	2.29134	3.8539e-06	1.12517	0.000105
92840	REEP6	0.710904	0.0208506	0.78208	0.00840564	1.11771	5.82e-05
94101	ORMDL1	1.05121	0.00809942	0.941089	0.000184392	1.1147	0.00601
23354	HAUS5	0.613767	0.0418007	0.659182	0.0314403	1.11427	0.000198
6659	SOX4	0.936608	0.000632	1.12303	9.79629e-05	1.11395	4.45e-05
23109	DDN	0.641795	0.0174512	1.19493	0.000216086	1.11374	0.00407
4501	MT1X	1.38061	0.00021	1.87823	8.58626e-06	1.1115	0.0003
10525	HYOU1	0.471006	0.0291749	0.763488	0.00113801	1.11035	0.000117
2872	MKNK2	0.838844	0.0254615	1.12353	0.00325108	1.10743	5.85e-05
1475	CSTA	0.817712	0.00191964	1.8716	4.35324e-06	1.10486	0.00035
26012	NSMF	1.11157	0.00271509	1.2883	0.0006126	1.10081	0.000316
161145	TMEM229B	1.20543	0.00496725	-0.864174	0.0213427	1.10069	8.66e-05
64943	NT5DC2	0.977433	0.00169162	0.692445	0.00872997	1.09915	9.16e-05
6382	SDC1	1.42223	4.93e-05	0.732249	0.00213132	1.0989	0.000835
124446	TMEM219	1.11761	0.00111944	1.43271	0.000115069	1.09863	2.96e-05
53836	GPR87	2.8574	3.85e-05	0.896945	0.0295752	1.09619	0.0244
2644	GCHFR	0.804718	0.0122322	0.709668	0.0165061	1.09594	0.000222
26152	ZNF337	1.13777	0.00669785	1.05577	0.006753	1.09529	0.000499
7157	TP53	0.776669	0.00364113	1.35728	5.10102e-05	1.09301	6.17e-05
286006	LSMEM1	1.28191	0.0270728	2.08479	0.00100379	1.09139	0.0125
283899	INO80E	0.941003	0.00117066	1.61561	1.70538e-05	1.09115	0.000291
347744	C6orf52	1.21517	0.000778	1.09315	0.000894643	1.08905	0.000213
3665	IRF7	0.907106	0.0238869	1.89268	0.000150305	1.08899	0.000128
25870	SUMF2	1.03429	0.000532	1.8074	6.7428e-06	1.08795	2.84e-05
9140	ATG12	1.1482	0.000436	1.70683	1.6207e-05	1.08709	8.3e-05
23621	BACE1	0.992765	0.00361015	0.683294	0.0212957	1.08592	0.000152
93099	DMKN	1.32677	0.000135	1.94775	5.19306e-06	1.084	5.59e-05
84836	ABHD14B	1.11333	0.00164173	2.03668	1.60474e-05	1.08295	0.000872
5106	PCK2	0.980012	0.00218904	4.84419	7.11812e-08	1.0811	0.000378
51566	ARMCX3	1.70291	0.000243	0.999349	0.00446692	1.07852	0.00167
150696	PROM2	0.44373	0.0471737	0.619082	0.0229217	1.07699	4.72e-05
468	ATF4	-0.477018	0.0459769	1.89558	5.09875e-06	1.07256	5.64e-05
84232	MAF1	0.701157	0.021232	1.3192	0.00026276	1.07192	0.00011
79650	USB1	0.451377	0.0422654	0.893871	0.000499587	1.0691	0.00013
339456	TMEM52	0.595456	0.0481343	0.80245	0.00720503	1.06806	7.79e-05
94241	TP53INP1	3.47018	8.72e-06	1.53774	0.000992427	1.06182	0.000107
9619	ABCG1	-1.4463	0.00724566	-1.84778	0.000969107	1.06028	0.000222
81669	CCNL2	-1.13099	0.00217573	-0.9036	0.00540568	1.05949	0.00073
6890	TAP1	2.46194	1.4e-05	1.64291	0.00010032	1.0587	0.000134
285550	FAM200B	1.50384	0.000138	1.39719	0.000113641	1.05866	8.3e-05
10844	TUBGCP2	0.578698	0.010544	0.460411	0.0243865	1.05615	7.78e-05
23062	GGA2	1.74435	0.000179	1.52182	0.000232883	1.05555	0.000146
6525	SMTN	0.703888	0.012797	0.822717	0.00250643	1.0546	8.24e-05
93058	COQ10A	1.79211	6.42e-05	2.00179	1.49943e-05	1.05395	7.2e-05
80347	COASY	0.895079	0.00175281	1.55462	2.39103e-05	1.05342	5.82e-05
347862	GATD1	1.2861	0.000129	2.37493	1.24841e-06	1.05245	0.000147
2319	FLOT2	0.96611	0.0024542	0.594222	0.0256345	1.05218	0.000223
80195	TMEM254	1.01429	0.00111314	1.04349	0.000530942	1.05138	0.000103
1030	CDKN2B	2.41385	5.23e-06	5.05836	5.38757e-08	1.05114	0.000528
84245	MRI1	0.88621	0.00834441	-1.06	0.00176658	1.05039	0.000921
90522	YIF1B	0.98257	0.0247159	0.846272	0.0216127	1.04933	6.84e-05
7317	UBA1	0.869011	0.00422135	0.800938	0.00439819	1.04829	0.0003
56906	THAP10	1.74793	9.76e-06	2.11947	1.44979e-06	1.04679	6.06e-05
51599	LSR	0.93787	0.00111162	1.73274	9.90599e-06	1.04668	5.54e-05
10681	GNB5	0.752764	0.00712544	-0.685659	0.00694245	1.04632	0.000265
8682	PEA15	1.60398	9.76e-06	2.15213	8.37855e-07	1.04368	0.000153
375287	RBM43	1.35797	0.0049312	1.09782	0.0111173	1.04282	0.000175
119504	ANAPC16	1.32173	0.000356	2.32552	4.4242e-06	1.04134	0.000509
64776	C11orf1	1.43428	0.00012	2.07534	1.14205e-06	1.038	0.000198
53827	FXYD5	1.08833	0.0135077	1.09547	0.00872012	1.03738	6.71e-05
81858	SHARPIN	0.595273	0.0402868	1.15144	0.000546298	1.03682	0.000321
581	BAX	1.15447	0.000422	0.599937	0.0148586	1.03675	0.000175
230	ALDOC	1.50504	4.47e-05	2.32894	1.36031e-06	1.03651	8.03e-05
84296	GINS4	1.63984	0.000327	0.646742	0.047629	1.03538	0.000101
64689	GORASP1	1.04074	0.00699196	1.57758	0.000287461	1.03484	0.000175
57106	NAT14	1.31382	0.000134	1.74674	9.94559e-06	1.03403	5.4e-05
63826	SRR	1.13658	0.000963	1.34818	8.69255e-05	1.03189	6.67e-05
79789	CLMN	-1.48413	0.00115669	-2.10863	6.01603e-05	1.03076	0.000115
8733	GPAA1	0.79998	0.00329935	0.797655	0.00200004	1.03038	0.000206
400961	PAIP2B	1.28381	0.00948048	2.16467	0.000198275	1.03008	0.000201
54862	CC2D1A	0.59066	0.0375691	1.23095	0.00171766	1.02994	0.000309
80318	GKAP1	-0.909032	0.00840675	0.76054	0.0115273	1.02811	0.000957
4782	NFIC	-0.744012	0.011903	-0.883882	0.00220397	1.0277	0.000407
6715	SRD5A1	0.961724	0.000532	0.643028	0.00419444	1.02651	0.000152
29952	DPP7	1.02029	0.000553	1.58315	3.59521e-05	1.02618	0.000368
27290	SPINK4	1.23106	0.000799	0.621687	0.0282102	1.02562	0.000191
23623	RUSC1	0.648402	0.00907958	0.744934	0.00251426	1.02467	0.000124
400073	C12orf76	1.85985	0.000116	3.41642	1.16259e-06	1.02418	0.00275
2280	FKBP1A	1.24028	7.85e-05	0.7189	0.00133004	1.02252	4.21e-05
97	ACYP1	1.45018	0.000211	1.03539	0.0010928	1.02086	0.00029
5723	PSPH	0.580993	0.0136544	2.27257	1.25836e-06	1.02005	8.35e-05
3659	IRF1	1.52554	0.00058	0.603797	0.0124661	1.01851	0.000304
84065	TMEM222	0.929254	0.000699	2.17233	1.43673e-06	1.01845	5.3e-05
201229	LYRM9	1.21526	0.00145516	2.63318	4.63837e-06	1.01723	4.31e-05
369	ARAF	-1.46129	0.00637389	0.979435	0.0075911	1.01283	0.000137
79716	NPEPL1	0.780336	0.0063252	1.13465	0.000339055	1.01202	0.00022
115817	DHRS1	1.76407	0.000123	1.1788	0.000967664	1.012	0.000148
80270	HSD3B7	0.567248	0.0406885	0.712437	0.00869181	1.01199	7.73e-05
414	ARSD	1.05449	0.00658499	2.44557	1.34242e-05	1.01074	9.25e-05
23381	SMG5	0.757893	0.00887055	2.19611	4.86933e-06	1.00578	0.000476
83638	C11orf68	1.61398	0.000345	1.69046	0.000133781	1.0053	0.000318
57402	S100A14	0.709351	0.00654319	0.775682	0.00238832	1.00448	6.19e-05
3783	KCNN4	1.18182	0.00614226	-1.91246	0.000155443	1.00373	0.000349
23646	PLD3	0.966338	0.0221942	1.31001	0.00252477	1.00243	0.00885
2539	G6PD	0.874288	0.00160477	0.769324	0.00218614	1.00141	7.05e-05
199990	FAAP20	0.78936	0.0101863	1.5062	9.20359e-05	1.00137	9.65e-05
27346	TMEM97	0.812056	0.000814	1.96301	1.36031e-06	1.00041	5.39e-05
10947	AP3M2	1.61962	0.000118	2.30695	5.43234e-06	0.998481	0.000299
9088	PKMYT1	1.36242	0.000179	1.02611	0.00064564	0.998416	7.38e-05
56654	NPDC1	1.05586	0.000178	1.41878	1.25673e-05	0.997834	0.000355
124975	GGT6	1.39445	0.000494	-0.841775	0.00724698	0.995828	9.14e-05
5595	MAPK3	0.699073	0.0241512	0.644739	0.0255288	0.994269	6.44e-05
29937	NENF	1.36008	0.000251	1.35581	0.000132601	0.994039	7.11e-05
2531	KDSR	1.45822	0.00231487	1.48641	6.3803e-05	0.993126	0.00144
91689	SMDT1	0.844555	0.00180538	0.87284	0.000639947	0.992717	0.000294
5608	MAP2K6	-0.806189	0.0323989	-2.31624	2.61924e-05	0.9921	0.000296
253982	ASPHD1	0.970322	0.00194207	1.1793	0.000307376	0.991206	7.78e-05
23612	PHLDA3	2.84356	8.29e-06	1.97456	4.32525e-05	0.989202	0.000141
147798	TMC4	0.999203	0.00818535	1.66161	0.00018181	0.984848	0.000301
6881	TAF10	0.603738	0.00812622	1.10598	9.20237e-05	0.983593	0.000173
1200	TPP1	0.872071	0.00441966	0.616145	0.0207255	0.983593	0.000173
283951	C16orf91	0.906786	0.000646	1.35249	2.31717e-05	0.981214	5.64e-05
4494	MT1F	1.31114	0.000144	2.91007	5.31989e-07	0.981095	0.000957
8507	ENC1	1.27661	0.000573	1.89319	2.12193e-05	0.980849	6.12e-05
64771	C6orf106	0.964187	0.0314077	-1.10704	0.00468576	0.980815	0.000664
201161	CENPV	1.38175	6.11e-05	2.30423	1.16259e-06	0.980533	7.32e-05
87	ACTN1	0.465958	0.0337078	-1.11699	0.00123556	0.979764	0.000134
83637	ZMIZ2	0.561925	0.0154183	0.692749	0.0029541	0.978003	0.00182
527	ATP6V0C	0.587723	0.0086191	0.783981	0.000892857	0.977542	0.000138
84795	PYROXD2	0.739318	0.0342204	1.22858	0.00120504	0.976966	0.000427
83982	IFI27L2	1.06518	0.00361094	1.07658	0.00208393	0.976601	0.000294
5603	MAPK13	0.49591	0.0493495	0.542602	0.0233099	0.976332	0.000198
210	ALAD	0.80607	0.00104704	1.01288	0.000122629	0.97451	0.000186
6990	DYNLT3	1.25767	0.00012	1.51577	1.68761e-05	0.974379	0.000167
10489	LRRC41	0.794632	0.0152233	1.35534	0.000334023	0.973747	0.000142
3069	HDLBP	1.01529	0.00214755	1.06843	0.000919943	0.972726	8.74e-05
51307	FAM53C	1.0646	0.000165	2.22579	7.97447e-07	0.972265	7.78e-05
23019	CNOT1	-0.888389	0.00214119	-1.27544	0.000106598	0.97116	0.00089
6286	S100P	1.09383	0.00045	4.17358	7.33212e-08	0.97072	0.000531
162394	SLFN5	2.2014	7.02e-05	3.82541	1.03194e-06	0.968692	0.0023
1534	CYB561	0.5019	0.045579	0.704686	0.00522748	0.968266	0.00212
56985	ADPRM	0.989894	0.00943126	2.50793	1.26853e-05	0.968058	0.000405
613	BCR	-1.08719	0.00185089	-1.06216	0.00129141	0.966559	8.84e-05
925	CD8A	0.785575	0.0162312	1.29294	0.000465381	0.965525	0.000579
54929	TMEM161A	0.845518	0.000794	1.11066	6.75667e-05	0.960535	0.000309
4828	NMB	1.13841	0.000315	1.10678	0.000202138	0.958097	8.07e-05
10262	SF3B4	0.602925	0.0352942	0.803074	0.0051082	0.956813	0.000294
11253	MAN1B1	0.936329	0.00492015	0.898882	0.00402247	0.955794	0.000998
58513	EPS15L1	-2.27084	3.14e-05	-0.697818	0.0285769	0.953422	5.64e-05
56731	SLC2A4RG	0.853479	0.000975	1.61711	7.36824e-06	0.951833	7.49e-05
56834	GPR137	0.634315	0.0159208	0.788812	0.00290532	0.949882	0.000111
66035	SLC2A11	1.0736	0.000861	1.90367	0.000300096	0.946596	0.000125
11152	WDR45	0.99323	0.00314415	2.32794	6.15858e-06	0.94648	0.000331
10155	TRIM28	0.783039	0.001349	0.717037	0.00142289	0.945031	0.000111
7508	XPC	2.00482	4.86e-06	2.46887	6.72698e-07	0.943482	0.0017
27344	PCSK1N	1.2919	0.000632	1.03454	0.0015616	0.94307	0.000669
7033	TFF3	0.93619	0.027294	1.08129	0.00866487	0.941325	0.000326
53615	MBD3	0.660806	0.0162276	0.744383	0.00548301	0.940819	9.91e-05
55020	TTC38	0.958858	0.0406643	0.807573	0.00417191	0.939083	0.000244
55608	ANKRD10	1.10966	0.00136768	0.540971	0.0492279	0.937961	0.000194
135114	HINT3	1.10616	0.000799	1.70032	2.358e-05	0.937656	0.00201
219541	MED19	1.29511	0.00031	2.05688	7.36824e-06	0.935749	0.000152
5524	PTPA	0.698036	0.0129467	0.862628	0.00500361	0.934038	0.00057
1397	CRIP2	0.795981	0.00885457	-0.592505	0.0290742	0.932748	0.000407
58986	TMEM8A	0.736343	0.0126503	1.65713	3.94948e-05	0.932742	0.000152
10945	KDELR1	0.734551	0.00232384	0.633669	0.00223722	0.93252	0.000122
55684	RABL6	-0.669613	0.0301749	0.76213	0.00526076	0.932117	0.000253
26001	RNF167	0.612677	0.0291227	0.704176	0.00960751	0.930491	0.000108
134147	CMBL	1.52465	5.07e-05	0.824332	0.00159594	0.930128	0.000153
80303	EFHD1	0.623757	0.0218047	-1.01245	0.000754029	0.929048	0.00158
2783	GNB2	0.613019	0.0130306	0.763858	0.00227585	0.927762	0.000103
149603	RNF187	0.780967	0.00468407	1.35648	7.04387e-05	0.925753	0.00019
6387	CXCL12	-2.39776	3.06e-05	-3.09261	2.85566e-06	0.924262	9.98e-05
93343	MVB12A	0.664847	0.00789329	1.13719	0.000142935	0.923145	0.000311
51686	OAZ3	1.05323	0.0055867	0.820759	0.0152157	0.920443	0.000322
3710	ITPR3	0.938901	0.0228555	1.10394	0.00632357	0.919843	0.000132
6256	RXRA	-2.43275	2.44e-05	-2.69953	6.01513e-06	0.916433	0.000331
54206	ERRFI1	-0.711813	0.0066595	2.39535	1.4414e-06	0.916259	7.15e-05
8904	CPNE1	0.865773	0.00127858	1.06653	0.000175784	0.915347	0.000395
64073	C19orf33	0.902188	0.000989	1.03655	0.000214719	0.913761	0.00018
8974	P4HA2	0.900514	0.00224732	0.62771	0.0123278	0.912957	0.000521
10278	EFS	-0.929888	0.000966	-0.501275	0.0237759	0.911578	0.000183
254428	SLC41A1	0.861069	0.00106223	0.701343	0.00237496	0.911316	0.000441
91289	LMF2	0.797153	0.030853	1.2946	0.00121622	0.911224	0.000244
441150	C6orf226	1.22099	0.00067	1.44071	0.000115865	0.90979	0.000219
5768	QSOX1	0.651154	0.0418199	0.620556	0.0380042	0.909363	0.000136
84954	MPND	0.882992	0.016327	1.89981	7.39855e-05	0.907841	0.000417
9647	PPM1F	-1.12696	0.0152142	-1.27333	0.00500215	0.907081	0.00259
9905	SGSM2	-0.788649	0.0386673	-0.838305	0.0203749	0.905719	0.000184
1353	COX11	0.80341	0.011094	0.661761	0.0214202	0.904319	0.00062
10227	MFSD10	1.13918	0.000768	1.63449	3.58363e-05	0.903471	0.00139
2316	FLNA	0.974341	0.013959	1.14175	0.00362831	0.902799	0.000386
80237	ELL3	1.5265	0.000226	0.644043	0.0262162	0.900442	9.74e-05
3257	HPS1	1.23902	0.0131477	2.00886	0.00039446	0.898818	0.000826
6747	SSR3	1.17402	0.000814	-0.916795	0.00680727	0.895454	0.000537
11328	FKBP9	0.639038	0.0299181	0.654794	0.0185742	0.895201	0.000155
57414	RHBDD2	1.43243	0.000191	2.38487	3.90868e-06	0.89446	0.00015
51147	ING4	0.742808	0.0158461	1.6213	6.45348e-05	0.894457	0.000407
64598	MOSPD3	0.812429	0.00468881	1.09873	0.000396699	0.893508	0.00178
51499	TRIAP1	1.53513	1.22e-05	1.27111	2.02351e-05	0.891776	9.86e-05
811	CALR	0.716584	0.0284518	0.411948	0.0406133	0.890476	0.00287
4833	NME4	1.01414	0.000323	1.11899	8.71066e-05	0.890177	0.0015
124565	SLC38A10	1.00321	0.00146618	0.812119	0.00339009	0.888107	0.000151
6892	TAPBP	1.03637	0.00162105	1.3251	0.000175336	0.887587	0.00519
6168	RPL37A	-2.05897	3.66e-05	-2.58581	4.04194e-06	0.887581	0.00161
3105	HLA-A	1.19393	0.00131485	1.25341	0.000552899	0.883939	0.00107
27163	NAAA	0.977757	0.000265	0.626517	0.00278361	0.883052	9.21e-05
3669	ISG20	0.896777	0.0322731	2.62147	4.92186e-06	0.882789	0.000764
8859	STK19	0.816449	0.00828841	1.38929	0.000157763	0.879682	0.000133
5824	PEX19	0.520546	0.0426264	1.12193	0.000281512	0.876801	0.00033
55652	SLC48A1	1.10732	0.000931	1.10053	0.000844247	0.871084	0.000572
55558	PLXNA3	0.77198	0.0301749	0.786735	0.0193033	0.87086	0.00283
4151	MB	0.854407	0.0016285	1.56686	1.55495e-05	0.870355	8.71e-05
1613	DAPK3	-1.05236	0.0256811	1.09904	0.0142365	0.869564	0.00133
113452	TMEM54	0.64429	0.0154548	0.690566	0.00699414	0.868784	0.000163
8991	SELENBP1	0.738539	0.0218771	0.919535	0.00424384	0.86699	0.000372
10548	TM9SF1	0.478021	0.0287429	-0.670347	0.0306789	0.865878	0.00239
3705	ITPK1	-0.443616	0.0363937	-0.65428	0.00282438	0.86539	0.000478
6322	SCML1	0.970372	0.00142524	2.04678	5.26128e-06	0.864865	0.000197
6320	CLEC11A	0.604951	0.0114734	1.15338	0.000107338	0.864818	0.000151
401115	C4orf48	0.906033	0.000736	1.15071	7.81478e-05	0.864498	0.000142
3155	HMGCL	0.998675	0.000391	2.18864	1.24841e-06	0.86124	0.000457
377	ARF3	0.653726	0.0174093	0.569735	0.024512	0.86122	0.000674
51	ACOX1	1.26631	0.00184391	-0.63541	0.0301473	0.860813	0.000508
56898	BDH2	1.00906	0.00939224	0.926107	0.0101884	0.86071	0.000119
23030	KDM4B	-1.49359	0.000345	-1.81855	4.84872e-05	0.856412	0.000332
9124	PDLIM1	0.626151	0.0131853	0.519164	0.0242816	0.855082	0.000173
83442	SH3BGRL3	1.00303	0.00305706	0.929217	0.00303479	0.85417	0.000197
64147	KIF9	0.614064	0.00998968	0.643509	0.00496761	0.853118	0.000162
79095	C9orf16	1.41048	2.44e-05	1.97754	1.43673e-06	0.852961	0.000351
8905	AP1S2	1.03774	0.000324	1.13919	9.04426e-05	0.852373	0.00021
55082	ARGLU1	0.971512	0.00579712	1.8109	3.0142e-05	0.851933	0.000558
27315	PGAP2	0.891376	0.00104277	1.73639	6.57916e-06	0.851809	9.18e-05
56894	AGPAT3	-1.20055	0.00631479	-1.73761	0.000350289	0.85124	0.000341
401152	C4orf3	1.13377	0.000191	0.809553	0.000990803	0.851156	0.00012
2010	EMD	0.658378	0.00820993	1.1125	0.000163191	0.851126	0.000143
51257	MARCH2	0.915702	0.00372032	0.794387	0.00558469	0.849488	0.000474
29904	EEF2K	-0.709403	0.00392003	-1.88668	3.52002e-06	0.849373	0.000242
84326	METTL26	1.03457	0.000288	1.27872	3.59358e-05	0.849156	0.000134
9830	TRIM14	0.737169	0.0204586	0.86971	0.00127911	0.848181	0.000197
113655	MFSD3	1.15749	0.00154095	2.50958	4.8422e-06	0.847877	0.000116
7297	TYK2	0.649188	0.0109388	1.51057	2.63503e-05	0.847207	0.00158
6992	PPP1R11	0.75327	0.00218916	1.23561	4.46887e-05	0.844507	0.000137
6199	RPS6KB2	0.86554	0.00278574	0.934308	0.00102186	0.840185	0.000821
51741	WWOX	0.568263	0.0249315	-0.890057	0.0128103	0.840032	0.000239
6210	RPS15A	2.88186	3.14e-06	1.94992	1.64626e-05	0.839958	0.0025
54960	GEMIN8	0.9045	0.00262219	1.39726	8.09553e-05	0.839685	0.000514
7917	BAG6	0.955165	0.000519	0.821026	0.000801206	0.838963	0.000202
79188	TMEM43	0.928999	0.000411	1.8033	2.70393e-06	0.838004	0.000417
207	AKT1	0.734545	0.00536007	0.603463	0.0109478	0.837936	0.000246
79169	C1orf35	1.12551	0.00089	1.25258	0.000239703	0.837582	0.0015
91612	CHURC1	0.874315	0.00123719	0.978645	0.000331149	0.835833	0.000372
5296	PIK3R2	0.469844	0.0353955	0.879106	0.0081288	0.835672	0.000173
80232	WDR26	-1.32247	0.000294	-1.423	9.33597e-05	0.834604	0.000748
113246	C12orf57	0.606483	0.00442687	1.40032	9.84731e-06	0.834462	0.000372
9255	AIMP1	2.25514	0.0013118	2.45441	0.000429023	0.833785	0.000125
8237	USP11	0.561528	0.0425589	1.22255	0.000261263	0.832569	0.000457
83543	AIF1L	0.801747	0.00122223	0.483312	0.0161212	0.832213	0.000568
11072	DUSP14	1.20835	0.000301	1.18069	0.000186022	0.832165	0.000347
4714	NDUFB8	0.786263	0.00159495	1.10137	9.14705e-05	0.830964	0.0028
6302	TSPAN31	0.687144	0.0182664	1.32508	0.000179988	0.830954	0.000195
79762	C1orf115	0.795872	0.00787037	1.00766	0.00113493	0.830817	0.000684
8073	PTP4A2	0.54297	0.0166643	0.891069	0.000492862	0.830435	0.00101
2593	GAMT	1.02541	0.000713	0.638417	0.00832084	0.829933	0.000355
51083	GAL	1.15334	0.000137	0.895462	0.000392467	0.829731	0.000185
55621	TRMT1	0.786555	0.00825684	1.05081	0.000637044	0.829614	0.00287
3281	HSBP1	1.40023	4.9e-05	0.998004	0.000234742	0.828334	0.000232
2962	GTF2F1	0.48192	0.0458105	0.684591	0.00490967	0.827238	0.000338
122616	CLBA1	0.78157	0.00234425	1.54836	1.36769e-05	0.825884	0.00205
64847	SPATA20	0.952557	0.00209674	2.0611	6.81747e-06	0.825358	0.00407
25844	YIPF3	0.769572	0.00404892	1.13703	0.000179661	0.825043	0.000214
26020	LRP10	1.46763	0.0130911	1.21911	0.0239092	0.824587	0.000494
140465	MYL6B	0.702753	0.00247456	0.95539	0.000182574	0.824084	0.00018
22941	SHANK2	-1.90418	0.000116	-1.92848	5.2369e-05	0.82264	0.000992
55898	UNC45A	0.951808	0.00194282	0.49594	0.0470292	0.820642	0.00025
5478	PPIA	1.03928	0.000407	0.929148	0.000479559	0.820463	0.00013
6048	RNF5	0.631091	0.00873809	0.542707	0.0135762	0.819178	0.00034
11078	TRIOBP	0.627953	0.00996565	1.38561	3.38873e-05	0.819088	0.000329
665	BNIP3L	0.577472	0.0115215	0.751624	0.00148505	0.818708	0.00032
55974	SLC50A1	0.504499	0.0165141	1.03282	0.000104224	0.817193	0.000127
435	ASL	0.798641	0.0215674	1.54647	0.000218661	0.81454	0.000241
64219	PJA1	0.785547	0.00454035	1.31273	8.75111e-05	0.813841	0.000296
2760	GM2A	1.11593	0.000122	0.862642	0.000354169	0.812898	0.00017
23406	COTL1	0.959015	0.00128739	1.36551	6.58642e-05	0.81228	0.000353
678	ZFP36L2	-1.596	1.64e-05	-0.956043	0.000256759	0.809991	0.000223
57798	GATAD1	0.943656	0.000448	2.11193	1.24841e-06	0.809542	0.000164
1466	CSRP2	1.6096	0.000253	1.1504	0.0013252	0.809283	0.000862
55611	OTUB1	0.995511	0.00376195	1.06993	0.00025982	0.809242	0.00295
23097	CDK19	-1.11731	0.000604	-0.775435	0.00371713	0.807614	0.00167
26985	AP3M1	1.05753	0.0398503	-0.74776	0.027222	0.807171	0.00186
822	CAPG	0.748767	0.0224274	1.58848	0.000122778	0.805185	0.000948
10120	ACTR1B	0.639849	0.0372942	1.89101	2.65217e-05	0.804449	0.000878
57175	CORO1B	0.565692	0.02415	0.508002	0.029045	0.803741	0.000201
7072	TIA1	0.57647	0.016848	-1.49096	1.40643e-05	0.803163	0.000543
3797	KIF3C	-0.862698	0.00482824	-0.547418	0.0378988	0.802984	0.000577
145748	LYSMD4	1.15448	0.00312488	0.813624	0.0155268	0.800884	0.00215
63874	ABHD4	1.58933	0.00105281	0.821228	0.0312034	0.800817	0.00576
5526	PPP2R5B	0.722469	0.0427742	1.09021	0.00305751	0.799679	0.000269
55829	SELENOS	0.691291	0.00199112	0.899345	0.000195539	0.79912	0.00153
677	ZFP36L1	1.04598	0.000862	1.84924	1.02205e-05	0.799045	0.000208
23625	FAM89B	0.743459	0.00271945	1.14907	8.42285e-05	0.798943	0.000132
25895	EEF1AKMT3	1.48783	0.000324	1.2072	0.000734142	0.797986	0.000243
10459	MAD2L2	0.72564	0.00617574	0.786133	0.00237568	0.79618	0.000279
10567	RABAC1	0.891301	0.000988	0.564663	0.0102019	0.794572	0.00143
79856	SNX22	0.783524	0.0363878	0.803209	0.0229539	0.79216	0.00318
54813	KLHL28	1.16555	0.00038	1.20897	0.000158584	0.791856	0.00158
51517	NCKIPSD	0.893916	0.00148096	1.11351	0.000190064	0.791302	0.000251
10270	AKAP8	-0.970415	0.000559	0.877055	0.00646144	0.790783	0.000744
1152	CKB	0.571995	0.0405435	0.565002	0.0309408	0.79024	0.000179
51114	ZDHHC9	0.557693	0.0413582	1.35474	0.000116076	0.789714	0.000779
55163	PNPO	0.594586	0.00853906	1.11671	8.34304e-05	0.788503	0.00213
10162	LPCAT3	0.694123	0.0450332	1.31211	0.000755903	0.788395	0.000483
54921	CHTF8	0.54627	0.0111683	1.5289	8.01244e-06	0.786385	0.000255
23474	ETHE1	0.885843	0.0336839	1.46059	0.00124295	0.785503	0.00205
221830	TWISTNB	0.518583	0.0191466	1.10748	9.47507e-05	0.784865	0.000204
57176	VARS2	0.749931	0.00712127	1.5261	3.89598e-05	0.784679	0.000958
6405	SEMA3F	-0.431944	0.0487606	-0.777257	0.0011954	0.784394	0.000957
57222	ERGIC1	0.474137	0.0393706	-0.591347	0.00867926	0.783959	0.000173
135154	SDHAF4	1.59163	0.000185	2.49914	4.71299e-06	0.782466	0.00242
93129	ORAI3	1.54714	0.000306	0.765111	0.0147818	0.782271	0.000301
5356	PLRG1	1.8053	0.00119868	1.43937	1.86838e-05	0.781958	0.00106
92579	G6PC3	0.832201	0.000955	1.08738	8.56821e-05	0.781705	0.000738
8508	NIPSNAP1	0.494451	0.0252452	0.832912	0.000719139	0.780012	0.000346
4267	CD99	1.21419	0.00163347	0.764528	0.00259829	0.777671	0.000214
6774	STAT3	0.889172	0.00858553	1.04737	0.0361062	0.776158	0.000917
2053	EPHX2	0.672481	0.0426092	0.743186	0.0186248	0.774875	0.00115
84929	FIBCD1	1.30569	0.00593171	1.6779	0.000734248	0.773682	0.000703
2690	GHR	-1.58526	0.00500247	-2.31673	0.00024976	0.773073	0.00257
6612	SUMO3	0.813869	0.00224533	0.538822	0.0162991	0.772505	0.0017
79006	METRN	0.985863	0.000484	1.62075	9.24091e-06	0.772325	0.000277
79143	MBOAT7	-0.924405	0.00661954	0.678906	0.00370383	0.771335	0.000263
10313	RTN3	0.557438	0.00951304	0.743171	0.00101033	0.771235	0.000184
11337	GABARAP	0.672396	0.00330577	0.82929	0.000501989	0.770556	0.000356
10974	ADIRF	1.35771	7.08e-05	1.82589	4.85224e-06	0.770426	0.000216
10922	FASTK	0.43339	0.0358259	1.30507	2.21728e-05	0.769462	0.00024
157	GRK3	-1.5399	0.0210079	-1.729	0.0075069	0.76912	0.0059
7542	ZFPL1	0.637064	0.0178667	1.20166	0.000203451	0.768597	0.00122
23363	OBSL1	1.13727	0.00188512	0.67843	0.0242298	0.767563	0.000445
11014	KDELR2	0.801283	0.00125898	0.480788	0.016952	0.766332	0.000197
2647	BLOC1S1	0.569164	0.0140888	0.894369	0.0005344	0.766232	0.000484
9274	BCL7C	0.771579	0.0148352	0.793175	0.00854623	0.764656	0.000945
345778	MTX3	1.34586	0.000284	2.07729	8.15573e-06	0.764486	0.000189
11243	PMF1	0.882921	0.00938708	0.672084	0.0273974	0.764444	0.00163
56987	BBX	-1.34637	6.14e-05	-1.69251	2.88182e-05	0.76253	0.000368
28992	MACROD1	0.597454	0.0241084	1.45579	5.33502e-05	0.760648	0.000403
50804	MYEF2	0.627147	0.0219053	-0.8387	0.00270453	0.760582	0.000869
51547	SIRT7	0.689688	0.0373465	1.198	0.00101364	0.759513	0.00139
160	AP2A1	0.726348	0.0328042	1.06382	0.00256451	0.759094	0.000745
54516	MTRF1L	0.909399	0.000493	1.3442	1.87505e-05	0.758943	0.000353
3837	KPNB1	1.22415	0.00160656	-0.51339	0.0242299	0.758144	0.000234
1054	CEBPG	-1.33107	0.000295	2.74285	1.17121e-06	0.757564	0.000508
132299	OCIAD2	0.869132	0.00214071	0.955327	0.00067929	0.757349	0.000527
3654	IRAK1	1.89085	5.61e-05	1.50733	0.000123855	0.757128	0.000266
123	PLIN2	0.797544	0.00470835	1.47871	4.57043e-05	0.756842	0.00187
340542	BEX5	1.0356	0.00054	1.12749	0.000161745	0.756307	0.00811
84418	CYSTM1	0.616522	0.00463766	0.900002	0.000228771	0.756097	0.000389
9577	BABAM2	0.547095	0.0151651	-0.700129	0.0118895	0.755775	0.000262
3038	HAS3	1.66435	0.000603	1.34114	0.0012455	0.754639	0.000813
858	CAV2	1.46119	0.0020802	0.952792	0.0165759	0.753026	0.00138
1969	EPHA2	1.46861	0.000875	1.46575	0.000502011	0.75238	0.002
55851	PSENEN	0.830267	0.00155984	1.13927	0.000102303	0.752316	0.000485
400916	CHCHD10	0.670768	0.00490396	0.917087	0.000387483	0.751702	0.000294
57535	KIAA1324	0.886325	0.00642891	0.805373	0.0160031	0.750573	0.00118
84266	ALKBH7	0.508875	0.0302012	0.658344	0.00500054	0.749561	0.000319
6594	SMARCA1	-1.05831	0.00158503	-1.48452	8.97854e-05	0.748868	0.000198
6386	SDCBP	0.933137	0.000773	1.1107	0.000127517	0.74773	0.000357
27243	CHMP2A	0.834342	0.00571401	0.96181	0.00145771	0.746623	0.00103
84314	TMEM107	0.626796	0.0271543	-0.933828	0.00175264	0.745627	0.000241
7389	UROD	0.756857	0.00153649	0.941706	0.000198815	0.744371	0.000194
113419	TEX261	0.850042	0.00281502	1.06942	0.000363321	0.743942	0.000305
84993	UBL7	1.06583	0.0015382	0.831249	0.00448669	0.743592	0.000314
10589	DRAP1	0.868456	0.000613	0.658842	0.00214754	0.742756	0.00151
55781	RIOK2	0.792214	0.038314	1.46599	1.52853e-05	0.742751	0.000329
81876	RAB1B	0.880396	0.000753	0.645233	0.00327342	0.742211	0.000269
126299	ZNF428	0.538016	0.0334882	0.846589	0.00167505	0.741859	0.000387
9887	SMG7	0.5147	0.0341346	1.27357	7.78855e-05	0.739912	0.00546
9419	CRIPT	1.04347	0.00026	1.42146	1.68365e-05	0.737965	0.00079
147184	TMEM99	0.941963	0.00288427	1.85145	1.79059e-05	0.737653	0.00048
51596	CUTA	0.849643	0.000957	1.18476	5.56973e-05	0.736957	0.00021
4291	MLF1	1.11194	0.000736	1.26256	0.000167494	0.736876	0.00152
81873	ARPC5L	0.681748	0.00289515	1.29875	2.20107e-05	0.734104	0.00111
154791	FMC1	0.825578	0.00144008	1.09801	0.000142221	0.733317	0.000516
5355	PLP2	1.00386	0.000279	0.746994	0.00112304	0.731859	0.000483
26063	DECR2	0.625132	0.00716112	1.12307	9.07744e-05	0.731159	0.000418
222068	TMED4	1.67987	9.05e-05	0.771832	0.000801195	0.731051	0.00031
7528	YY1	0.820884	0.00295492	1.50248	1.48682e-05	0.729056	0.000238
5349	FXYD3	1.40154	0.000146	0.755577	0.00464748	0.729021	0.000732
5272	SERPINB9	0.508686	0.0343969	0.51904	0.0220977	0.728486	0.0023
22900	CARD8	-1.19113	0.0165551	-0.902616	0.0455603	0.727147	0.0024
5590	PRKCZ	-0.937516	0.00317717	-0.830468	0.004212	0.727111	0.000402
1212	CLTB	0.883882	0.000931	0.800809	0.00103311	0.726133	0.00163
23177	CEP68	1.1327	0.00311455	1.00037	0.00419813	0.724424	0.000344
55585	UBE2Q1	0.844688	0.0273721	0.577046	0.00499944	0.724404	0.000706
90410	IFT20	0.785187	0.00140213	0.963873	0.000197966	0.723784	0.000241
10263	CDK2AP2	0.560866	0.0171075	0.765164	0.00176189	0.722225	0.000425
9130	FAM50A	0.568217	0.0220772	0.493206	0.0313934	0.721071	0.000521
26993	AKAP8L	0.760034	0.0337078	2.36176	1.66178e-05	0.720816	0.00109
11040	PIM2	0.593443	0.0404698	0.645846	0.0189891	0.720523	0.000303
5877	RABIF	-1.04615	0.000532	-1.18447	0.000121755	0.715998	0.000236
1512	CTSH	0.62289	0.00955904	0.504138	0.0204891	0.714411	0.00129
55049	REX1BD	0.935909	0.000882	2.17505	1.8224e-06	0.713361	0.000466
8623	ASMTL	0.766342	0.00329257	0.547015	0.0152073	0.712952	0.000582
7286	TUFT1	0.506536	0.0310892	2.86771	4.28055e-07	0.712649	0.000621
373156	GSTK1	0.989942	0.00111132	1.73376	1.41692e-05	0.712462	0.000311
5264	PHYH	1.53237	0.00129775	1.05652	0.00803002	0.712342	0.00803
5430	POLR2A	0.543526	0.0190277	1.46357	1.97604e-05	0.711253	0.000743
1727	CYB5R3	0.578751	0.0215224	0.556617	0.0182678	0.707582	0.00053
23433	RHOQ	0.41078	0.0403351	1.42702	1.0238e-05	0.707376	0.000488
23641	LDOC1	0.451418	0.0402051	0.462032	0.0258156	0.705992	0.002
10490	VTI1B	0.695608	0.00327768	0.883608	0.00493613	0.704711	0.00033
5827	PXMP2	0.586896	0.0111314	0.815614	0.000922532	0.703919	0.000463
2762	GMDS	0.867032	0.0242553	-1.3892	0.0116764	0.70388	0.0011
5424	POLD1	0.554063	0.0248936	1.3961	4.44815e-05	0.703328	0.000513
3275	PRMT2	1.17127	0.00023	1.17446	0.00387107	0.702754	0.000691
6277	S100A6	0.937287	0.00154527	0.834621	0.00195216	0.702339	0.00209
7029	TFDP2	-1.05274	0.00061	-0.514465	0.0269169	0.701165	0.00477
6472	SHMT2	0.599917	0.0163379	2.23718	2.05104e-06	0.699853	0.000472
440	ASNS	0.595973	0.00680334	3.2656	1.16105e-07	0.699824	0.000511
10245	TIMM17B	0.649728	0.0105764	0.642924	0.00744601	0.699819	0.000418
3485	IGFBP2	0.737599	0.0286462	0.679566	0.0303363	0.699216	0.000902
1052	CEBPD	0.804138	0.00788283	1.16221	0.000461702	0.698688	0.000642
84163	GTF2IRD2	0.689981	0.00813037	1.44152	3.80656e-05	0.69839	0.000866
995	CDC25C	-0.918934	0.00850032	-1.38716	0.00895888	0.697522	0.00306
9921	RNF10	0.891201	0.0119031	1.05152	0.000376372	0.695615	0.000521
10581	IFITM2	0.74748	0.0030081	0.582798	0.00851754	0.694551	0.00041
51079	NDUFA13	0.460522	0.0228291	0.722034	0.00101736	0.694179	0.0443
7090	TLE3	-1.16527	0.000371	1.00247	0.00482252	0.69352	0.000332
5522	PPP2R2C	-0.395339	0.0454214	-1.67169	3.47299e-06	0.691313	0.000391
23241	PACS2	0.845415	0.0125041	0.807098	0.0109034	0.690406	0.00219
64788	LMF1	-1.05962	0.00966026	-0.996556	0.009106	0.690099	0.00268
27244	SESN1	3.41258	1.66e-06	0.948715	0.00294564	0.68931	0.0012
5425	POLD2	0.703173	0.00490396	0.912929	0.000554891	0.688676	0.000594
51241	COX16	1.56611	5.66e-05	0.750035	0.00384875	0.68793	0.0105
9538	EI24	0.999055	0.000421	0.708535	0.00315867	0.687699	0.00525
1317	SLC31A1	0.70868	0.00404841	1.57991	1.11879e-05	0.687088	0.00145
163	AP2B1	0.935132	0.00480828	1.06502	0.00131573	0.686089	0.000789
8824	CES2	0.573311	0.00746283	1.08465	6.73965e-05	0.685576	0.00133
56647	BCCIP	1.21033	0.000744	1.17975	0.000492862	0.685055	0.00181
54539	NDUFB11	0.925607	0.000573	1.16699	6.35387e-05	0.684931	0.000384
84450	ZNF512	1.1802	0.00350297	1.79204	0.000125468	0.684861	0.000643
27034	ACAD8	1.09522	0.0159387	0.807273	0.0497272	0.684211	0.00109
374291	NDUFS7	0.734622	0.00402745	1.18868	9.51185e-05	0.683754	0.000487
10838	ZNF275	0.895733	0.00646009	1.11736	0.000997219	0.682546	0.00107
9709	HERPUD1	-0.720283	0.0152804	1.25434	0.000290284	0.681533	0.00107
826	CAPNS1	0.66384	0.00337607	0.450333	0.0203338	0.679982	0.00124
26127	FGFR1OP2	-0.56235	0.0299491	0.67685	0.00759997	0.67926	0.00323
84817	TXNDC17	0.578131	0.0055867	0.403035	0.0270071	0.679216	0.00147
10239	AP3S2	0.961458	0.00124073	2.06247	4.25496e-06	0.678963	0.000558
1725	DHPS	0.575155	0.0132115	0.862804	0.000675115	0.678665	0.000477
7076	TIMP1	0.943046	0.000309	0.56532	0.00491261	0.677179	0.000439
9391	CIAO1	1.33991	0.00015	1.5931	2.3695e-05	0.677011	0.000502
4134	MAP4	0.671244	0.0219053	-1.21953	0.000261689	0.675181	0.000371
55471	NDUFAF7	0.589835	0.0141605	0.869919	0.000827105	0.675065	0.0218
2873	GPS1	0.743646	0.00726523	0.721504	0.0056163	0.674884	0.00358
8894	EIF2S2	1.11277	0.0234779	0.728943	0.00111842	0.674791	0.00116
28966	SNX24	-1.27164	9.94e-05	-0.959702	0.000332562	0.673649	0.00129
51569	UFM1	0.780481	0.00879152	1.31735	0.00198172	0.673562	0.000867
26173	INTS1	1.04064	0.00470835	1.03399	0.00307298	0.673507	0.00942
51282	SCAND1	0.825004	0.00360359	1.57786	2.72961e-05	0.673026	0.00164
384	ARG2	1.26046	0.00014	1.94777	3.98947e-06	0.67172	0.00367
10741	RBBP9	0.544026	0.0424868	0.641349	0.0131234	0.670978	0.00114
80194	TMEM134	1.11055	0.000179	1.36817	2.23109e-05	0.66954	0.00117
9902	MRC2	0.565356	0.015508	0.563495	0.0106946	0.66797	0.00846
51604	PIGT	0.798839	0.00322204	0.841863	0.00141267	0.666011	0.000649
115098	CCDC124	0.859306	0.00220687	0.490119	0.0340543	0.664812	0.00131
22948	CCT5	0.930996	0.00271889	-0.374415	0.0442732	0.664211	0.000652
11201	POLI	-0.720655	0.032265	0.636931	0.0414897	0.663455	0.00522
258010	SVIP	0.979107	0.000461	0.624657	0.00489644	0.663135	0.00141
3217	HOXB7	1.51372	0.000185	2.01218	1.40343e-05	0.662543	0.00115
10983	CCNI	0.600803	0.0113524	1.23455	6.42747e-05	0.662264	0.00742
334	APLP2	0.912622	0.00104485	1.02449	0.00144217	0.662149	0.00101
5034	P4HB	0.54591	0.0247242	-0.398205	0.0493021	0.661788	0.003
84950	PRPF38A	1.50469	0.000182	0.825346	0.000930197	0.661436	0.00747
2810	SFN	1.45461	1.83e-05	0.905685	0.000216312	0.661404	0.000377
29894	CPSF1	0.748843	0.00386618	1.115	0.000160668	0.661294	0.00575
55316	RSAD1	0.636924	0.00990136	1.16495	0.000118726	0.660894	0.00221
22902	RUFY3	-0.790418	0.0201926	-0.487387	0.0350313	0.659684	0.00464
4701	NDUFA7	1.06503	0.000277	1.5597	1.11554e-05	0.658948	0.000991
402778	IFITM10	0.579694	0.0467333	-0.752474	0.00861102	0.657435	0.0278
11030	RBPMS	-1.73769	0.000793	-1.86695	0.000269291	0.657073	0.00162
11188	NISCH	0.902015	0.0270687	1.22236	0.00277631	0.656631	0.00185
56965	PARP6	0.80417	0.00936443	1.41284	0.000146633	0.654906	0.0019
23463	ICMT	0.846536	0.00350492	0.773211	0.00383582	0.654863	0.000613
81602	CDADC1	0.91307	0.00105289	2.07449	2.54065e-06	0.654747	0.0015
307	ANXA4	1.15479	0.000275	0.588219	0.0115245	0.654304	0.00305
85013	TMEM128	1.10515	0.00031	1.76861	7.02047e-06	0.652462	0.000628
25941	TPGS2	0.75563	0.00145584	1.2118	0.000347461	0.651548	0.000448
5886	RAD23A	0.524849	0.0274644	1.00696	0.000329807	0.651376	0.00145
9812	DELE1	1.57	0.00056	2.37103	1.83335e-05	0.651354	0.0049
84681	HINT2	0.729921	0.00158662	1.43956	9.29113e-06	0.651289	0.000498
155054	ZNF425	0.932441	0.00621624	1.91142	3.15854e-05	0.651245	0.0061
23181	DIP2A	-0.900585	0.0418824	0.844315	0.00284744	0.651105	0.0121
1676	DFFA	0.429166	0.0465418	0.542117	0.0100135	0.650688	0.0022
23767	FLRT3	1.36136	0.00527519	2.37007	7.92464e-05	0.650206	0.0146
10410	IFITM3	0.750067	0.00389339	0.742869	0.00256343	0.649872	0.00592
84991	RBM17	1.52455	0.000135	1.12013	0.000562569	0.64967	0.00444
23229	ARHGEF9	0.533906	0.0427656	0.76568	0.00422242	0.648202	0.00747
54471	MIEF1	0.822807	0.00672966	1.71131	3.14341e-05	0.648172	0.000691
1999	ELF3	-1.73364	0.000173	-1.65806	0.000118835	0.647953	0.000731
6051	RNPEP	0.905742	0.000977	0.716733	0.00262251	0.647953	0.000731
29099	COMMD9	0.485977	0.0432872	0.523852	0.0216143	0.647945	0.000703
5641	LGMN	0.872449	0.00551841	1.34773	0.000188943	0.64697	0.00141
54996	MARC2	0.787846	0.0225218	1.34243	0.000568883	0.646648	0.00329
10205	MPZL2	1.58973	0.000413	1.27856	0.00100224	0.646544	0.00101
60558	GUF1	0.981262	0.00188252	0.649092	0.0141025	0.644261	0.00112
10380	BPNT1	0.579527	0.0292085	-0.596655	0.0270804	0.643767	0.0136
4335	MNT	-1.27449	0.00422909	-0.987036	0.0122116	0.643273	0.00966
100	ADA	0.796305	0.00638224	1.18147	0.000298203	0.642914	0.000677
79600	TCTN1	0.71938	0.0149037	0.768884	0.00684355	0.642657	0.000628
56948	SDR39U1	0.665596	0.0184538	1.46964	7.25924e-05	0.642582	0.00125
6016	RIT1	1.93284	9.49e-05	1.72734	9.80458e-05	0.641205	0.00105
116228	COX20	0.924314	0.00105715	1.21102	9.31402e-05	0.640689	0.000577
8574	AKR7A2	0.780949	0.00146127	1.19869	4.53546e-05	0.639982	0.00127
10618	TGOLN2	0.659585	0.00530749	0.411222	0.0439499	0.63981	0.0015
1777	DNASE2	0.646324	0.00420235	1.42695	1.25673e-05	0.639637	0.000565
25915	NDUFAF3	0.676327	0.0126813	1.1934	0.000207822	0.639049	0.000626
65003	MRPL11	0.7291	0.0043867	0.506251	0.0225008	0.637604	0.00465
282991	BLOC1S2	0.957241	0.00174505	0.785731	0.00371064	0.637272	0.0135
80790	CMIP	-0.664235	0.00404438	-0.696427	0.00185489	0.636175	0.00462
2896	GRN	0.921398	0.000942	0.682485	0.00383304	0.635468	0.00269
59274	TLNRD1	0.791954	0.00169143	1.14855	7.80214e-05	0.635402	0.000528
10943	MSL3	0.805083	0.00191921	0.489017	0.0224457	0.634911	0.000791
10152	ABI2	-0.995885	0.00169143	-0.99089	0.00103768	0.634376	0.000789
5565	PRKAB2	1.49922	5.49e-05	2.54941	9.70911e-07	0.633036	0.0043
5092	PCBD1	1.07993	0.000154	1.04061	9.99941e-05	0.632509	0.000564
25798	BRI3	0.636916	0.0194443	1.6858	2.29096e-05	0.632458	0.00182
8760	CDS2	-0.742073	0.00542052	-2.20241	2.49706e-06	0.63095	0.000713
5510	PPP1R7	0.645874	0.0053721	0.957315	0.00259233	0.629443	0.000507
5777	PTPN6	0.920757	0.0029118	1.33354	0.000141391	0.628221	0.000589
11334	TUSC2	1.05178	0.00202313	1.11348	0.000826979	0.62663	0.000974
1514	CTSL	0.914277	0.000761	1.29604	3.85448e-05	0.625706	0.000855
117177	RAB3IP	-0.952104	0.00547064	-0.570287	0.00560285	0.625087	0.001
540	ATP7B	-0.650745	0.0499049	-0.753208	0.0176913	0.624291	0.000563
8848	TSC22D1	-1.63174	0.00031	-1.57084	0.000212535	0.624212	0.00121
51667	NUB1	0.877221	0.00122125	1.70101	7.95694e-06	0.623288	0.00351
203	AK1	0.83818	0.00278235	0.590074	0.0393426	0.623024	0.000906
23596	OPN3	0.857941	0.0055146	1.04871	0.000951547	0.622332	0.00666
1643	DDB2	1.44423	3.14e-05	0.44641	0.027746	0.620975	0.000798
2987	GUK1	1.01128	0.000227	1.12343	5.74759e-05	0.62071	0.00112
84747	UNC119B	0.72456	0.00410398	1.35247	3.70886e-05	0.620633	0.000861
8502	PKP4	-1.24744	0.0013244	-1.23919	5.34167e-05	0.620462	0.00521
9878	TOX4	1.12447	0.0107252	1.72061	0.00045655	0.62044	0.000881
50848	F11R	0.47228	0.0241399	1.35492	1.78578e-05	0.62019	0.00326
51097	SCCPDH	0.542266	0.0336213	0.83913	0.0018698	0.61942	0.00449
219654	ZCCHC24	-1.16939	0.0023062	-1.30676	0.000657936	0.619259	0.00569
6692	SPINT1	0.579444	0.0424617	0.58558	0.0291551	0.619095	0.00129
26270	FBXO6	0.801766	0.00467267	0.954153	0.000947525	0.618043	0.00171
10458	BAIAP2	-0.692557	0.0197901	-1.03962	0.00113039	0.617956	0.0163
10682	EBP	0.423536	0.0372966	1.27858	2.31561e-05	0.617292	0.0193
3292	HSD17B1	-1.88225	0.000276	-1.97162	0.000104771	0.617125	0.000946
54555	DDX49	0.746192	0.00767199	1.03972	0.000136637	0.615897	0.00142
9785	DHX38	1.38858	0.000139	1.56785	3.08234e-05	0.613732	0.00355
1141	CHRNB2	0.853845	0.0116446	0.653587	0.0321736	0.61364	0.0108
4947	OAZ2	0.520973	0.0300202	-0.662298	0.00844819	0.612523	0.000703
2286	FKBP2	0.68854	0.0274965	0.565163	0.0496442	0.611006	0.000991
152926	PPM1K	-1.43317	0.00372352	-0.905822	0.0313364	0.610969	0.0257
25803	SPDEF	-0.803583	0.00142103	-1.17366	6.15694e-05	0.609565	0.0203
1017	CDK2	0.596871	0.0136267	-0.965859	0.00922856	0.6095	0.000697
975	CD81	0.7088	0.00467751	0.758208	0.0019134	0.609396	0.000797
51647	CIAO2B	0.656646	0.0030176	0.849239	0.000324676	0.608817	0.000579
2194	FASN	0.51741	0.0465546	0.676722	0.0082148	0.608335	0.00361
120071	LARGE2	0.699411	0.0431197	0.744991	0.0228615	0.607641	0.0263
5281	PIGF	0.91767	0.000618	0.94605	0.000464155	0.606135	0.00209
83986	FAM234A	0.702704	0.00342037	0.699495	0.00217076	0.605173	0.00103
22992	KDM2A	-1.11628	0.000224	-1.13436	0.00010139	0.604482	0.00452
389	RHOC	0.896933	0.00222976	0.878977	0.00153261	0.604364	0.000854
51150	SDF4	0.692458	0.00322539	0.722877	0.00538309	0.603996	0.002
3916	LAMP1	0.736884	0.00422909	0.604104	0.00586157	0.603682	0.0174
4696	NDUFA3	0.841572	0.000899	1.04237	0.000114761	0.603646	0.00205
388722	C1orf53	1.26618	8.79e-05	1.20186	6.10632e-05	0.60252	0.00353
7846	TUBA1A	0.776999	0.00173565	1.53127	1.0306e-05	0.602024	0.00939
196264	MPZL3	0.657201	0.0147588	1.25773	0.000143979	0.601595	0.000951
706	TSPO	0.799597	0.00236065	0.991975	0.00032917	0.600951	0.00117
7263	TST	0.668903	0.0105822	0.467375	0.0453284	0.598312	0.00137
280636	SELENOH	0.830417	0.000722	0.978344	0.000126641	0.598101	0.00169
5830	PEX5	1.00896	0.000703	1.13255	0.00017297	0.597447	0.0283
51428	DDX41	0.761326	0.00338655	0.920699	0.000589281	0.59737	0.00579
57335	ZNF286A	0.603498	0.0125948	0.647632	0.00553803	0.59543	0.00346
29893	PSMC3IP	0.960412	0.000312	1.53912	7.02047e-06	0.594712	0.00509
405	ARNT	-1.3457	0.000377	-1.62109	5.7142e-05	0.594166	0.00148
54919	DNAAF5	0.930569	0.00688909	-0.872949	0.00049804	0.592655	0.00347
5089	PBX2	-1.15179	0.00551567	-1.64335	0.000329562	0.592427	0.00153
23475	QPRT	0.682613	0.00221956	2.03519	1.0115e-06	0.589396	0.00338
28981	IFT81	-0.6997	0.0406304	-1.14769	0.00167449	0.589243	0.00388
9553	MRPL33	0.628057	0.00966026	1.01445	0.000275397	0.588496	0.00138
64853	AIDA	0.44869	0.0329289	0.803664	0.000684652	0.588162	0.00163
54344	DPM3	1.12202	0.000375	1.5797	1.97604e-05	0.587698	0.00284
55011	PIH1D1	0.442662	0.0497857	0.724224	0.00229433	0.586775	0.000933
9524	TECR	0.96173	0.000331	0.49097	0.0133568	0.585797	0.00164
2752	GLUL	1.25917	0.00037	0.90794	0.000286018	0.585735	0.00244
8940	TOP3B	0.910143	0.00311085	2.04655	8.52044e-05	0.58539	0.00124
1939	EIF2D	0.497688	0.0382078	0.650932	0.00631623	0.585326	0.000797
1465	CSRP1	0.593984	0.0115215	0.882252	0.000611747	0.584866	0.00116
7014	TERF2	-0.833716	0.0212569	1.04919	0.00382472	0.584657	0.00497
79144	PPDPF	0.844829	0.001349	1.86516	6.26764e-06	0.58427	0.00203
4898	NRDC	0.614977	0.00646009	0.529779	0.010023	0.583743	0.00461
7837	PXDN	0.619347	0.0413061	-1.66075	0.000161691	0.583445	0.00091
3226	HOXC10	-0.394302	0.0491448	0.832102	0.000408356	0.581762	0.0101
7138	TNNT1	0.53348	0.0153332	0.596974	0.0053456	0.5815	0.00117
25839	COG4	0.562592	0.0143396	0.729028	0.00197751	0.580719	0.000954
79090	TRAPPC6A	0.791513	0.00276594	1.96908	3.72413e-06	0.58016	0.00165
3423	IDS	0.953314	0.00109749	0.739466	0.00667978	0.579775	0.000948
1789	DNMT3B	-0.779501	0.00905172	-1.15906	0.00045082	0.578441	0.022
6891	TAP2	1.00934	0.00863906	1.60224	0.000269939	0.577168	0.00484
10950	BTG3	1.67783	7.55e-05	1.6267	4.52742e-05	0.575502	0.00126
26227	PHGDH	0.90967	0.00115929	2.77008	5.31989e-07	0.575255	0.00195
22921	MSRB2	0.448225	0.0452516	1.19985	6.96471e-05	0.574579	0.00611
21	ABCA3	0.854029	0.00115138	0.500707	0.0177585	0.574564	0.00579
1389	CREBL2	0.491587	0.0311176	0.595402	0.00769482	0.570728	0.00215
427	ASAH1	0.656093	0.00343225	0.836604	0.00119311	0.570619	0.00453
29914	UBIAD1	0.813249	0.00213226	0.505592	0.0216674	0.570574	0.000865
5860	QDPR	0.644406	0.00980804	0.87498	0.000925641	0.570094	0.00656
7428	VHL	0.775841	0.0080528	1.95673	1.07854e-05	0.569911	0.002
10652	YKT6	0.533316	0.0459157	0.920964	0.00142912	0.568096	0.0032
57530	CGN	-1.11072	0.00304343	-2.05338	6.43754e-05	0.56759	0.00716
6648	SOD2	0.795327	0.00235228	0.640481	0.0479229	0.566518	0.00128
119391	GSTO2	0.566272	0.0119869	0.919928	0.00034761	0.566359	0.00661
10437	IFI30	0.686739	0.00296072	0.389373	0.0435467	0.566066	0.00232
57018	CCNL1	-1.03178	0.000561	-1.49949	0.000424358	0.56584	0.00762
55540	IL17RB	1.39742	0.000226	1.17844	0.000377427	0.565809	0.00357
50865	HEBP1	0.441475	0.0408061	0.553007	0.00884792	0.564928	0.00115
23476	BRD4	-0.706119	0.00784274	1.32119	9.90144e-05	0.564895	0.00104
84292	WDR83	1.0158	0.000842	1.01291	0.000483276	0.56452	0.00169
65244	SPATS2	-1.31164	9.95e-05	-0.964413	0.000400004	0.564214	0.0089
10069	RWDD2B	0.66539	0.00388245	2.18107	9.89457e-07	0.564039	0.00283
10067	SCAMP3	0.458225	0.0285677	0.823374	0.000548868	0.563035	0.00238
119032	BORCS7	1.08038	0.000853	0.919801	0.00143049	0.563003	0.00324
3280	HES1	-1.27822	0.000224	-1.14645	0.000242546	0.562612	0.00174
1819	DRG2	0.556075	0.0222051	0.54189	0.0176185	0.560482	0.00091
387882	C12orf75	0.446214	0.0472326	0.488859	0.0220019	0.559582	0.00184
8440	NCK2	-0.717108	0.0136168	-0.752102	0.00692819	0.557963	0.00201
54496	PRMT7	0.77254	0.00122125	-0.579536	0.00457957	0.557369	0.00173
54499	TMCO1	0.696528	0.00601894	0.469706	0.0337123	0.555964	0.0015
567	B2M	0.492391	0.0181505	0.588473	0.00436397	0.555673	0.00153
84299	MIEN1	0.770558	0.00188484	1.10613	9.31458e-05	0.554904	0.00158
55246	CCDC25	1.11103	0.0090091	2.04892	9.99215e-05	0.553195	0.00123
1719	DHFR	1.06393	0.000565	0.789216	0.00229605	0.551917	0.0056
79004	CUEDC2	0.893169	0.00416067	0.531817	0.0449509	0.551804	0.00125
1657	DMXL1	-1.85963	0.000804	-2.57368	4.84872e-05	0.550438	0.0028
2677	GGCX	0.651659	0.0161373	0.855035	0.00242187	0.549151	0.00678
55696	RBM22	0.862038	0.000853	1.43548	8.39465e-05	0.548568	0.0147
94104	PAXBP1	-2.15328	6.24e-05	-2.45413	1.26853e-05	0.548096	0.00146
518	ATP5MC3	0.902664	0.00363719	-0.606041	0.00368507	0.547832	0.00636
5230	PGK1	0.675727	0.00367105	-0.399543	0.0455844	0.547735	0.00148
25771	TBC1D22A	-0.733104	0.00445582	-1.35989	4.25606e-05	0.547348	0.00416
10330	CNPY2	0.673123	0.00473581	0.797396	0.000752175	0.547222	0.0015
4259	MGST3	0.723334	0.00325185	0.676312	0.0030582	0.545648	0.00242
6834	SURF1	0.609212	0.00787016	1.38073	2.12193e-05	0.54517	0.0012
694	BTG1	1.02437	0.00222781	1.18499	0.000501117	0.544931	0.00152
7390	UROS	0.894095	0.00144552	1.84767	6.21059e-06	0.544877	0.00204
54972	TMEM132A	0.782779	0.0352734	0.88795	0.0129565	0.544778	0.003
26751	SH3YL1	0.612805	0.00410253	0.480643	0.0110486	0.544759	0.00111
977	CD151	0.708058	0.00610047	0.529459	0.0204333	0.543606	0.00249
80762	NDFIP1	0.646959	0.00911006	0.57752	0.0338864	0.543404	0.0112
4738	NEDD8	0.624956	0.00428734	0.426664	0.0240332	0.543174	0.000942
2937	GSS	0.545158	0.0299578	0.510086	0.018101	0.542678	0.0021
81579	PLA2G12A	0.987409	0.00352576	1.07749	0.00123718	0.541931	0.00234
5208	PFKFB2	1.11338	0.000373	1.6109	1.65378e-05	0.540478	0.0153
25796	PGLS	0.630564	0.00776382	1.04943	0.00016923	0.540399	0.00493
6443	SGCB	0.912385	0.000377	1.73036	2.85566e-06	0.538535	0.016
1025	CDK9	1.49706	0.000652	2.33811	1.71882e-05	0.538362	0.00177
55975	KLHL7	0.755768	0.00271377	0.819885	0.000961336	0.53754	0.01
84317	CCDC115	0.994573	0.000269	0.805972	0.000602653	0.536324	0.00133
10916	MAGED2	0.682196	0.00535831	0.796685	0.00125173	0.535156	0.00839
7319	UBE2A	0.817341	0.00479293	0.679097	0.00398414	0.534389	0.00207
123803	NTAN1	0.979635	0.00358118	0.884516	0.00486299	0.533751	0.0011
6419	SETMAR	0.774909	0.00352579	0.962059	0.000515375	0.533671	0.00304
51526	OSER1	-1.65943	7.73e-05	0.913045	0.000956771	0.532854	0.00252
55128	TRIM68	0.718722	0.023201	2.80387	2.34548e-06	0.531537	0.0036
25873	RPL36	0.513391	0.020517	0.861107	0.00055766	0.531342	0.00386
90121	TSR2	0.750984	0.00449084	0.967017	0.000528936	0.530172	0.00721
2135	EXTL2	0.579382	0.0190746	0.597998	0.0109487	0.52946	0.00232
10053	AP1M2	1.02675	0.000435	0.493438	0.022813	0.529269	0.00278
2879	GPX4	0.48876	0.0328733	0.666384	0.00405545	0.529184	0.00166
340719	NANOS1	0.859313	0.00109748	0.943356	0.000331263	0.526506	0.00167
1906	EDN1	-1.75052	0.000384	-0.804492	0.0260441	0.525193	0.0067
26272	FBXO4	0.776601	0.00635409	0.711041	0.00690725	0.525016	0.0267
79083	MLPH	-0.834889	0.0046745	-0.966193	0.00114329	0.524577	0.00804
170622	COMMD6	0.716836	0.0029462	1.11032	8.99896e-05	0.524042	0.00245
3831	KLC1	-0.888081	0.00622064	0.649459	0.0232927	0.523508	0.00375
7559	ZNF12	-0.752988	0.00584024	1.25531	6.25173e-05	0.523026	0.00307
84656	GLYR1	0.534726	0.0210181	0.964989	0.000347461	0.520275	0.0129
22821	RASA3	-1.5295	0.000283	-1.41399	0.000256146	0.519983	0.00675
51255	RNF181	0.463496	0.0217193	0.776016	0.000607306	0.518869	0.0033
2314	FLII	0.824094	0.0029528	0.835642	0.000483276	0.518584	0.00233
93974	ATP5IF1	1.06368	0.000851	0.445737	0.0293318	0.518082	0.00137
51011	FAHD2A	0.710252	0.00571401	1.48607	2.48262e-05	0.517806	0.00282
79671	NLRX1	0.900525	0.0225952	1.07579	0.00567202	0.517646	0.00225
51454	GULP1	-1.54479	0.00114836	-1.888	0.000164823	0.516942	0.0048
65258	MPPE1	0.93031	0.00460033	1.46587	0.000133174	0.515506	0.00192
65109	UPF3B	0.605593	0.00688957	0.961891	0.000202352	0.515296	0.00338
5037	PEBP1	0.793024	0.00169143	0.93572	0.000323634	0.515143	0.00559
25776	CBY1	0.498613	0.0292595	1.12558	0.000115865	0.513748	0.00226
3491	CYR61	1.04278	0.00853042	1.20739	0.013244	0.512732	0.0109
57506	MAVS	-0.736361	0.0127117	-0.635163	0.0191955	0.512677	0.023
493753	COA5	0.790861	0.00175393	1.38037	2.32146e-05	0.51257	0.00262
10975	UQCR11	0.618706	0.0039632	0.983007	0.000105632	0.511874	0.00166
25828	TXN2	0.80387	0.00555112	0.57981	0.0226742	0.511393	0.00567
3149	HMGB3	0.605408	0.0421372	-0.50559	0.0131125	0.510923	0.00166
9885	OSBPL2	-0.664263	0.00551841	-0.963347	0.00652586	0.510476	0.00889
9238	TBRG4	0.523413	0.0418759	0.557883	0.0220019	0.509667	0.00316
2021	ENDOG	0.952748	0.000336	0.480131	0.014518	0.508812	0.00237
84261	FBXW9	1.01921	0.000552	1.78385	6.90463e-06	0.508664	0.00738
50862	RNF141	1.08867	0.00597615	0.912303	0.0108465	0.508365	0.0104
5480	PPIC	0.681235	0.00500832	0.486193	0.0219903	0.507468	0.00768
9516	LITAF	0.482601	0.0222805	0.598774	0.00593687	0.50728	0.00257
23788	MTCH2	1.02218	0.000584	0.576401	0.0123266	0.506073	0.0024
30000	TNPO2	0.749245	0.0096643	1.72293	3.01841e-05	0.505732	0.00489
79613	TANGO6	-1.05206	0.0428989	-1.19779	0.0160678	0.505646	0.00527
29058	TMEM230	0.723248	0.00404461	0.783319	0.000813712	0.505161	0.00592
7586	ZKSCAN1	1.14649	0.000118	2.47157	5.21171e-07	0.503154	0.00522
200634	KRTCAP3	0.6993	0.0166526	0.685443	0.0126554	0.503012	0.00171
10591	DNPH1	0.915623	0.000652	1.59874	8.33749e-06	0.50298	0.00393
22818	COPZ1	0.474837	0.0385346	0.828744	0.00102211	0.500301	0.0026
11052	CPSF6	0.639169	0.0105553	1.07075	0.000237699	0.499237	0.00194
28996	HIPK2	-1.73325	0.00181162	-2.99809	2.53083e-05	0.498691	0.0428
84269	CHCHD5	0.588618	0.0392429	0.859645	0.00332896	0.497407	0.0123
51248	PDZD11	0.980893	0.000457	0.885655	0.000503265	0.496026	0.00353
5537	PPP6C	-1.09634	0.014249	-2.46828	4.57621e-05	0.495241	0.00374
8409	UXT	0.536766	0.0162923	0.51992	0.0131851	0.494939	0.00861
1652	DDT	0.680362	0.00326848	0.70502	0.0016009	0.494715	0.00293
220074	LRTOMT	1.04465	0.00783606	1.49398	0.000492862	0.494645	0.0237
3978	LIG1	0.767027	0.0037475	-0.620571	0.0085025	0.494474	0.00375
9213	XPR1	-0.762735	0.00189439	-1.73832	4.42144e-06	0.494058	0.0117
65264	UBE2Z	0.70987	0.0486804	1.39615	0.000652435	0.493723	0.00737
475	ATOX1	0.801183	0.00183819	0.699842	0.00262693	0.493657	0.00199
64756	ATPAF1	0.61629	0.00999669	-1.18536	0.00824253	0.492846	0.00812
54849	DEF8	0.714259	0.00195581	1.69007	3.00635e-05	0.492035	0.00358
127687	C1orf122	0.460831	0.0332747	0.715538	0.00180376	0.490957	0.00281
64343	AZI2	0.728113	0.0213102	2.18555	1.11707e-05	0.490417	0.00205
25824	PRDX5	0.706492	0.00312668	1.25636	2.64778e-05	0.489992	0.00571
1347	COX7A2	0.755377	0.00266506	1.05899	0.000159876	0.489799	0.00428
54935	DUSP23	0.480613	0.0465458	0.613884	0.00939777	0.488727	0.00167
126328	NDUFA11	0.625864	0.0238441	1.37131	0.00010674	0.488549	0.0122
10432	RBM14	-1.42009	0.000141	-0.995389	0.0308314	0.488095	0.0408
8850	KAT2B	-0.748883	0.0103709	-1.49874	6.87276e-05	0.488089	0.00385
2639	GCDH	0.804681	0.0154705	1.23223	0.000718893	0.487952	0.00258
381	ARF5	0.814119	0.00187461	0.917499	0.000497309	0.487943	0.00717
113791	PIK3IP1	0.59704	0.0415222	0.722637	0.0110298	0.487924	0.0224
7587	ZNF37A	1.0792	0.00332162	1.29674	0.000603003	0.487538	0.00225
113179	ADAT3	-1.02522	0.0178937	-0.820138	0.0381776	0.486798	0.0254
57095	PITHD1	0.508367	0.0204682	0.881844	0.000439701	0.485769	0.00396
92312	MEX3A	0.499881	0.0329112	0.54935	0.0142387	0.48504	0.00932
5500	PPP1CB	0.877714	0.00813037	0.578196	0.0124916	0.484737	0.00789
2017	CTTN	1.38575	0.00135015	2.09928	4.57452e-05	0.483284	0.00681
6993	DYNLT1	0.640768	0.00352389	0.811374	0.000449179	0.48215	0.00699
11060	WWP2	-0.602714	0.0370995	-1.39257	0.00136953	0.482015	0.00295
10577	NPC2	0.63164	0.00871402	1.19093	8.32354e-05	0.482011	0.00272
84105	PCBD2	1.79678	0.00585481	1.91213	0.00250384	0.481496	0.00966
51125	GOLGA7	0.665211	0.00270476	0.850721	0.000310398	0.480348	0.00452
7264	TSTA3	0.746975	0.00636777	0.612732	0.0129699	0.479674	0.00314
3956	LGALS1	0.612337	0.00705359	0.46768	0.0209112	0.478955	0.00786
220002	CYB561A3	0.937895	0.00104394	0.901237	0.000783658	0.478759	0.0034
51263	MRPL30	0.489532	0.032371	0.523612	0.0161692	0.476925	0.0076
9886	RHOBTB1	-0.812046	0.0119661	-1.19826	0.000670924	0.476191	0.0138
55771	PRR11	-0.644764	0.012417	0.694477	0.0232161	0.475718	0.00304
58492	ZNF77	-0.804197	0.0290384	1.23235	9.93113e-05	0.475713	0.00414
90850	ZNF598	0.880739	0.0420929	1.47786	0.00121869	0.474776	0.00373
5720	PSME1	0.716692	0.00278338	0.476965	0.0189891	0.474531	0.00536
2744	GLS	2.00796	0.000154	1.32305	0.000482547	0.474144	0.0182
9578	CDC42BPB	-1.0414	0.0444066	-1.69968	0.0019652	0.474139	0.00444
256281	NUDT14	0.701534	0.00911442	1.40868	5.77613e-05	0.473728	0.0153
653784	MZT2A	0.584424	0.00737203	0.949447	0.000187889	0.473663	0.00309
54107	POLE3	0.612232	0.00614162	0.652922	0.00259829	0.473522	0.00226
7726	TRIM26	-0.765417	0.0114349	1.13339	8.47548e-05	0.47075	0.00287
729967	MORN2	0.877406	0.00211133	0.79303	0.00244392	0.470247	0.019
6950	TCP1	0.545706	0.0192315	0.822971	0.0129462	0.470174	0.00357
6625	SNRNP70	0.826649	0.000813	0.570025	0.00514572	0.469964	0.0101
4074	M6PR	0.583912	0.0079507	0.922579	0.000250789	0.469854	0.00581
26263	FBXO22	1.30394	5.38e-05	1.52901	9.0239e-06	0.469673	0.0176
8837	CFLAR	-0.582082	0.00930607	-1.65364	5.83307e-06	0.469195	0.0227
29927	SEC61A1	0.86973	0.000741	0.838319	0.000530038	0.467966	0.00387
9296	ATP6V1F	0.674834	0.00373646	0.752894	0.00113855	0.467814	0.00411
51614	ERGIC3	0.735129	0.00162224	0.911347	0.000216946	0.467761	0.00291
2040	STOM	1.60672	7.73e-05	1.04344	0.000772716	0.466195	0.0347
4358	MPV17	1.13294	0.000226	0.809369	0.00117009	0.466047	0.00284
81559	TRIM11	-1.37353	0.00159085	0.88488	0.00140542	0.465746	0.0272
4601	MXI1	0.850977	0.00208908	1.26006	8.47002e-05	0.465645	0.0112
81704	DOCK8	-1.14825	0.00519398	-2.49416	1.76466e-05	0.464872	0.0447
10801	SEPT9	-0.550159	0.0152907	-1.49787	1.41254e-05	0.464435	0.0277
9158	FIBP	0.52927	0.0255372	0.60253	0.00871385	0.463907	0.00293
125150	ZSWIM7	0.486246	0.0274105	0.564535	0.00846124	0.462898	0.00322
6727	SRP14	0.433461	0.0333595	0.610042	0.00337941	0.462605	0.00435
11267	SNF8	0.680868	0.00718537	0.76207	0.00229095	0.461254	0.00587
23593	HEBP2	0.627805	0.00551841	1.1394	6.31772e-05	0.460726	0.00304
51421	AMOTL2	-0.50404	0.0185468	2.10026	1.23567e-06	0.459896	0.0169
11112	HIBADH	0.729242	0.00230989	0.404166	0.0402803	0.459456	0.00415
9682	KDM4A	-0.887759	0.0188814	1.49151	0.00036272	0.459091	0.00453
22916	NCBP2	0.606208	0.0156602	1.11416	0.000204872	0.458995	0.00296
10327	AKR1A1	0.736925	0.00567225	1.84564	7.6283e-06	0.458647	0.00714
23787	MTCH1	0.467983	0.0306132	0.502102	0.0149569	0.458586	0.00416
55845	BRK1	0.90285	0.00295608	1.04071	0.000701214	0.455435	0.00791
29087	THYN1	0.697089	0.0190972	0.66483	0.0168822	0.455296	0.0155
92400	RBM18	0.898883	0.00170649	1.17557	0.000159367	0.455241	0.0132
6470	SHMT1	0.434082	0.0346061	-0.517056	0.00963125	0.454991	0.00714
23479	ISCU	0.906948	0.000383	1.09688	5.66013e-05	0.454366	0.00355
391356	PTRHD1	0.672435	0.00373646	0.58774	0.00535343	0.453581	0.00382
11332	ACOT7	0.70156	0.0410233	-1.57648	0.000196958	0.451899	0.00429
5699	PSMB10	0.748205	0.0290419	1.11544	0.00195216	0.450971	0.00747
84333	PCGF5	1.20317	0.00108968	1.05597	0.00150216	0.450573	0.027
10195	ALG3	0.590582	0.0133612	0.616598	0.00697204	0.449602	0.00866
2877	GPX2	1.09964	0.00716112	-1.00981	0.00768125	0.449573	0.00941
90637	ZFAND2A	0.823731	0.00111944	1.49499	1.11879e-05	0.446539	0.018
79647	AKIRIN1	-0.421858	0.036583	1.218	3.01657e-05	0.446417	0.0138
175	AGA	0.766271	0.00650927	0.668753	0.011306	0.446413	0.00428
23587	ELP5	0.629112	0.0171738	0.419735	0.0407012	0.446305	0.00919
51635	DHRS7	0.654452	0.00419118	0.643207	0.00290625	0.445586	0.00787
4521	NUDT1	1.00861	0.000227	0.819396	0.000495969	0.445394	0.00675
25938	HEATR5A	-1.54259	0.000632	-2.52634	1.22824e-05	0.444873	0.0263
161291	TMEM30B	0.941051	0.000568	0.806152	0.000895654	0.444368	0.0115
81554	RCC1L	0.423675	0.0370278	-0.693551	0.00148229	0.444226	0.0183
6397	SEC14L1	-0.788624	0.0223409	-1.71694	0.000203728	0.443639	0.0439
50485	SMARCAL1	-0.642872	0.0051338	-0.649132	0.00304569	0.443389	0.00758
64718	UNKL	0.931625	0.00554919	-0.502403	0.0432225	0.443276	0.00806
847	CAT	1.03003	0.000199	0.52752	0.00899298	0.443051	0.0321
2975	GTF3C1	-0.563029	0.0104395	-0.984119	0.000174279	0.442282	0.0126
51690	LSM7	0.456643	0.0305038	0.514777	0.0113457	0.442208	0.00382
51293	CD320	0.924393	0.00240709	0.801439	0.003624	0.440472	0.00496
23582	CCNDBP1	0.609902	0.00901982	1.31425	3.52167e-05	0.44031	0.0113
114327	EFHC1	-1.64683	0.00350014	-2.09857	0.000425831	0.439936	0.0042
327	APEH	0.567834	0.030795	0.53481	0.0293635	0.439209	0.00835
1716	DGUOK	0.696075	0.00327812	1.30338	2.84092e-05	0.438394	0.00472
51069	MRPL2	0.881901	0.020476	0.963433	0.00856373	0.438135	0.00831
140739	UBE2F	-0.727468	0.00874077	-0.489523	0.045966	0.437789	0.00361
6749	SSRP1	0.715238	0.00412038	0.827023	0.000997219	0.437094	0.00835
388	RHOB	-0.924002	0.000377	-1.01673	0.000104043	0.436847	0.014
38	ACAT1	0.791166	0.00108203	0.63869	0.00254889	0.436305	0.00382
10238	DCAF7	-0.638774	0.00595439	0.459262	0.0399946	0.435495	0.0112
51317	PHF21A	-2.53053	4.86e-06	-1.52405	6.13027e-05	0.435406	0.0149
23480	SEC61G	0.588883	0.0103771	0.534998	0.0119196	0.435317	0.00688
3028	HSD17B10	0.718017	0.00195186	0.433718	0.0234326	0.433789	0.00626
831	CAST	0.622238	0.0121098	-0.571021	0.0131686	0.433764	0.00566
8678	BECN1	0.786126	0.008765	0.894326	0.00256717	0.433428	0.00586
5872	RAB13	0.556279	0.0104127	0.629441	0.00322821	0.431753	0.00588
221545	C6orf136	1.06396	0.0259751	0.944852	0.0329378	0.431188	0.0075
140823	ROMO1	0.491547	0.0196988	0.815587	0.00056923	0.43112	0.00729
56061	UBFD1	0.735373	0.00314604	1.02081	0.000207106	0.430677	0.0103
5562	PRKAA1	-0.70251	0.019409	1.48521	0.000103	0.42981	0.0404
84284	NTPCR	1.11237	0.000433	0.764412	0.00290251	0.429348	0.0129
3958	LGALS3	0.77556	0.00222976	0.731344	0.00196843	0.429242	0.00937
3030	HADHA	0.67497	0.0101839	0.504969	0.0438178	0.428888	0.00431
3146	HMGB1	0.669516	0.0033931	-0.48956	0.0136893	0.428499	0.00506
55630	SLC39A4	0.808822	0.00533891	0.905052	0.00164866	0.428101	0.00479
79101	TAF1D	0.54805	0.0405435	0.661037	0.0109105	0.4256	0.0497
821	CANX	1.01299	0.00428479	0.994481	0.00299727	0.425593	0.00421
10897	YIF1A	0.465534	0.0476728	1.41564	3.17859e-05	0.425088	0.00758
7328	UBE2H	-1.24503	0.000613	-0.744619	0.00917698	0.424877	0.00666
143187	VTI1A	-2.06513	0.000338	-1.66457	0.00080469	0.42373	0.0194
51390	AIG1	0.816857	0.00858466	-0.641279	0.0185049	0.423624	0.0477
56005	MYDGF	0.504153	0.048235	0.480821	0.0438268	0.422539	0.00884
4728	NDUFS8	0.493762	0.0135866	0.683111	0.00121226	0.422235	0.00803
10491	CRTAP	0.832479	0.0368385	0.862728	0.0220019	0.421935	0.00568
637	BID	0.485048	0.0471036	-0.592205	0.0210921	0.421492	0.0211
4502	MT2A	0.953119	0.00039	1.35059	1.966e-05	0.420967	0.0312
6138	RPL15	1.91884	0.000342	0.854157	0.000413863	0.418069	0.0129
81563	C1orf21	-0.63294	0.0213363	-1.58034	3.81078e-05	0.416958	0.00501
389541	LAMTOR4	0.634784	0.00459378	0.680515	0.00184595	0.416693	0.0172
7453	WARS	0.406033	0.0460679	1.41549	5.03255e-05	0.41656	0.00535
1978	EIF4EBP1	0.519185	0.0195594	2.13206	1.42781e-06	0.416312	0.00459
22848	AAK1	-1.25925	0.000966	-1.50014	0.000163191	0.414706	0.0178
64210	MMS19	0.632799	0.011718	1.01901	0.000359117	0.414398	0.00677
50488	MINK1	-1.05156	0.00107774	-1.27259	0.000163838	0.414321	0.00854
127544	RNF19B	1.67341	0.000747	1.80068	0.0012549	0.413838	0.0332
3364	HUS1	0.778365	0.0227454	1.46074	0.000295136	0.413802	0.0138
493856	CISD2	0.48286	0.0321278	0.681344	0.00315462	0.411944	0.0047
5134	PDCD2	1.21319	0.00111162	0.919102	0.00392908	0.411086	0.00635
30815	ST6GALNAC6	0.640105	0.0202128	0.848398	0.00259033	0.4104	0.0161
8798	DYRK4	0.626952	0.0313761	1.38573	0.000148658	0.409237	0.00529
9761	MLEC	1.15782	9.95e-05	1.5257	7.72896e-06	0.408746	0.007
399909	PCNX3	0.988039	0.00372105	0.744693	0.01262	0.40857	0.0227
9406	ZRANB2	0.638377	0.00880745	0.776013	0.00169607	0.408432	0.0316
79591	ARMH3	-0.695138	0.0103398	-0.999923	0.000665077	0.408383	0.00547
55374	TMCO6	0.890723	0.00236065	1.24675	0.000141831	0.408308	0.0276
100128731	OST4	0.63714	0.00311528	0.619573	0.00228986	0.408017	0.00684
8464	SUPT3H	-1.4322	0.00387471	-1.1224	0.0105133	0.407509	0.0435
10061	ABCF2	1.57266	0.000818	4.14311	8.64457e-07	0.40655	0.0391
255812	SDHAP1	-1.93355	0.00108855	-2.6549	7.01863e-05	0.405976	0.0117
7126	TNFAIP1	0.793187	0.00401714	1.33542	7.29393e-05	0.405201	0.0183
152206	CCDC13	0.96583	0.00816217	1.33933	0.000638792	0.40408	0.0241
9581	PREPL	0.758309	0.00430818	1.10347	0.000214199	0.404	0.0163
11187	PKP3	0.712884	0.00210981	0.506148	0.0105259	0.403413	0.00899
26207	PITPNC1	-0.421405	0.0442995	-0.693903	0.0018475	0.40327	0.00985
23306	NEMP1	-1.35007	0.0156856	-2.04913	0.000775057	0.402548	0.0268
10946	SF3A3	1.18059	0.00135015	1.19029	0.000746951	0.400303	0.019
57542	KLHL42	1.12529	0.000143	1.03739	0.00012523	0.399912	0.043
11017	SNRNP27	0.647714	0.00494567	1.12827	7.37791e-05	0.399541	0.00605
203069	R3HCC1	0.543641	0.0363878	0.907054	0.00127911	0.398945	0.0291
5954	RCN1	0.86405	0.000441	1.95829	1.16259e-06	0.39858	0.00641
4258	MGST2	0.841808	0.00364401	-0.515196	0.035919	0.397803	0.00804
114793	FMNL2	-1.52727	2.64e-05	-1.88523	3.31965e-06	0.395975	0.014
374395	TMEM179B	0.730278	0.00624863	1.50132	3.11673e-05	0.393927	0.0109
130814	PQLC3	0.723892	0.0056188	1.13681	0.000172006	0.392406	0.0211
2512	FTL	0.957129	0.000367	0.792257	0.000731426	0.391167	0.00579
26353	HSPB8	0.501312	0.0139555	-0.682583	0.00139024	0.389509	0.0158
6923	ELOB	1.2265	0.000362	0.76959	0.000703617	0.389014	0.013
740	MRPL49	0.519971	0.0288024	0.633606	0.00676186	0.388791	0.0142
10629	TAF6L	-1.17536	0.0215868	-1.51404	0.00336776	0.387663	0.0261
29094	LGALSL	0.722763	0.0117616	0.933287	0.00160805	0.386018	0.0498
27433	TOR2A	1.24378	0.00188512	1.28448	0.00091031	0.385771	0.0117
2495	FTH1	0.825871	0.0011916	1.07522	0.000110809	0.384896	0.00686
8407	TAGLN2	0.623484	0.00422135	-0.593114	0.00361413	0.384849	0.00628
6720	SREBF1	-0.664552	0.0138624	-0.597578	0.0432938	0.384232	0.0429
254359	ZDHHC24	0.833187	0.00288275	0.996873	0.000528936	0.384078	0.0203
29984	RHOD	0.75225	0.0030439	0.417049	0.0489786	0.381698	0.0145
8777	MPDZ	-1.0549	0.0168139	-2.02704	0.000165664	0.381608	0.0411
6046	BRD2	0.734706	0.00203372	1.89737	2.1555e-06	0.380466	0.0157
7284	TUFM	0.666888	0.00734191	0.737907	0.00250839	0.380023	0.0118
7267	TTC3	0.458482	0.0286922	-1.23356	0.00143303	0.379675	0.00744
1802	DPH2	0.669719	0.0218771	0.727334	0.00953597	0.378631	0.0105
57189	KIAA1147	0.492298	0.0497194	0.840657	0.00173932	0.378479	0.0133
10360	NPM3	0.563687	0.0133926	0.66708	0.00325057	0.37832	0.0132
4192	MDK	0.560672	0.0156983	0.70007	0.00278727	0.378139	0.0174
26048	ZNF500	-1.18819	0.00858553	-0.98443	0.0163511	0.378106	0.00833
1376	CPT2	0.663434	0.00659918	0.584066	0.00901532	0.377725	0.0089
51447	IP6K2	1.52804	6.64e-05	2.5582	1.22105e-06	0.377489	0.0338
56900	TMEM167B	0.770571	0.00216049	1.38608	2.3587e-05	0.375856	0.0109
8763	CD164	0.454432	0.0393366	0.477877	0.0219535	0.375275	0.00822
91647	ATPAF2	1.0985	0.00179108	1.04706	0.00146172	0.373918	0.00864
22897	CEP164	-0.565702	0.0236069	0.61049	0.0107919	0.373691	0.0252
51060	TXNDC12	0.677625	0.00404461	0.897712	0.000384781	0.373674	0.0104
6498	SKIL	0.821667	0.0181448	0.895925	0.00754162	0.371837	0.0131
7422	VEGFA	-1.25531	8.83e-05	1.54506	1.07632e-05	0.371465	0.0179
522	ATP5PF	0.630599	0.00589695	0.390346	0.0489201	0.371157	0.00922
8479	HIRIP3	0.749232	0.0132398	0.834976	0.00466295	0.369571	0.0138
79036	KXD1	0.507242	0.0378703	0.484996	0.0336846	0.369452	0.0103
84726	PRRC2B	-0.681082	0.0273561	0.960229	0.00872479	0.369436	0.0213
80745	THUMPD2	0.611232	0.0456278	1.91079	2.45475e-05	0.369259	0.012
8724	SNX3	0.493488	0.0163517	0.636157	0.0023962	0.368988	0.0271
55968	NSFL1C	0.875725	0.000773	1.02289	0.00782454	0.368753	0.00754
219	ALDH1B1	0.680698	0.00544739	-0.629107	0.00558937	0.368356	0.035
64172	OSGEPL1	0.586635	0.0299237	0.640212	0.0315431	0.367992	0.0263
200539	ANKRD23	-0.914507	0.0115848	-0.938071	0.00664712	0.367402	0.0242
29988	SLC2A8	0.685904	0.0181081	1.12673	0.000544982	0.367371	0.0322
404672	GTF2H5	0.751678	0.0147854	0.560941	0.0443667	0.366396	0.0184
28956	LAMTOR2	0.673402	0.0120367	0.873853	0.00160152	0.366354	0.0155
55556	ENOSF1	0.681822	0.00799025	0.701088	0.00437357	0.364598	0.0295
83658	DYNLRB1	0.555446	0.00965137	1.11107	6.33927e-05	0.364414	0.013
8839	WISP2	0.950678	0.000949	1.64514	1.2981e-05	0.363132	0.0204
8379	MAD1L1	-2.33561	9.34e-06	-3.2513	6.43278e-07	0.362668	0.0253
25980	AAR2	0.624045	0.02035	1.18665	0.000229616	0.362314	0.0106
22949	PTGR1	1.21501	0.000184	0.789317	0.00177557	0.361492	0.0168
51398	WDR83OS	0.443171	0.0352593	0.678321	0.00213651	0.360999	0.0114
3177	SLC29A2	-0.901789	0.00530397	1.37969	6.43559e-05	0.360964	0.0229
51548	SIRT6	0.57185	0.024136	0.935754	0.00204241	0.359921	0.0284
9810	RNF40	0.717564	0.0132893	1.66955	3.37622e-05	0.357808	0.0147
51004	COQ6	0.891829	0.00123424	0.849859	0.000996983	0.357524	0.0192
10450	PPIE	0.601898	0.036583	1.82811	2.15438e-05	0.357243	0.0122
2787	GNG5	0.514357	0.0220147	0.683245	0.00284354	0.357092	0.0187
51594	NBAS	-0.733734	0.044328	-0.866617	0.00936334	0.356583	0.0306
27032	ATP2C1	0.701449	0.00898396	1.58037	2.57664e-05	0.356244	0.0197
114049	BUD23	0.52825	0.0289444	0.612527	0.00907704	0.355825	0.011
54858	PGPEP1	0.767529	0.0124093	0.796854	0.00665488	0.355551	0.0255
64792	IFT22	1.71518	0.000219	0.989695	0.00443586	0.355358	0.0156
51024	FIS1	0.557518	0.0317577	0.527948	0.0294901	0.354155	0.0213
84324	SARNP	0.673602	0.0244582	1.62735	5.7826e-05	0.353249	0.016
83549	UCK1	0.731449	0.00194916	0.391576	0.0418213	0.352402	0.0189
84265	POLR3GL	0.665504	0.0268984	1.82435	2.78936e-05	0.351914	0.0445
1476	CSTB	0.555231	0.00726861	0.741489	0.000720823	0.349805	0.0153
83544	DNAL1	-0.568515	0.0287408	-0.99817	0.000646999	0.349345	0.0447
10467	ZNHIT1	0.887433	0.00151213	0.868607	0.0010259	0.347687	0.0145
4731	NDUFV3	-1.48047	0.00145901	0.839014	0.000437677	0.347016	0.0216
79947	DHDDS	-0.785766	0.0148004	-0.856726	0.00603129	0.34692	0.0263
59286	UBL5	0.771187	0.010108	0.891397	0.00272841	0.346442	0.0113
30	ACAA1	0.948891	0.00417314	1.04258	0.0014175	0.346064	0.0154
9827	RGP1	0.498465	0.0456716	0.974337	0.000614865	0.345823	0.015
51102	MECR	0.933149	0.0312752	1.43762	0.0017504	0.344401	0.0146
219738	FAM241B	0.773539	0.0128656	0.588631	0.0360834	0.344028	0.0352
212	ALAS2	1.799	3.68e-05	2.12099	6.0175e-06	0.342394	0.0257
5204	PFDN5	0.562322	0.00749213	0.564466	0.00471923	0.342079	0.0312
5094	PCBP2	-2.03669	0.000401	0.759082	0.000950637	0.340406	0.0147
50717	DCAF8	1.38095	0.0021908	1.57781	0.000536145	0.339589	0.0315
2799	GNS	0.825835	0.00194454	0.605331	0.00815478	0.339148	0.0229
90550	MCU	-0.854325	0.00389206	-1.1785	0.00027757	0.338955	0.0219
6748	SSR4	0.412873	0.0337	0.41593	0.0231064	0.336836	0.0184
116540	MRPL53	0.489894	0.0154768	0.640525	0.00204636	0.335754	0.0333
11091	WDR5	-0.552021	0.0458597	1.35083	2.3281e-05	0.330969	0.0401
5660	PSAP	0.559862	0.0117616	0.422544	0.0348082	0.329906	0.0158
25996	REXO2	1.02454	0.00496435	0.692276	0.0019134	0.329714	0.018
6146	RPL22	0.784382	0.00161363	0.793509	0.000882345	0.328548	0.0167
8570	KHSRP	0.469943	0.0475947	0.920658	0.000646999	0.324017	0.0149
5441	POLR2L	0.465442	0.0212522	0.366627	0.0473594	0.322972	0.0247
10553	HTATIP2	1.32847	0.000363	0.930945	0.00217431	0.320871	0.0362
7009	TMBIM6	0.627287	0.00428234	0.80544	0.000510046	0.320633	0.0252
64795	RMND5A	-0.607356	0.00816305	0.57951	0.00701147	0.317772	0.0264
3417	IDH1	0.480466	0.0281064	0.921775	0.000340748	0.317219	0.0234
9687	GREB1	-0.694449	0.0125962	-0.880944	0.00194891	0.316436	0.0456
23450	SF3B3	1.32372	0.000217	0.983073	0.000862504	0.316352	0.0343
5621	PRNP	1.03322	0.00156925	1.94064	1.26853e-05	0.315733	0.0236
440574	MINOS1	0.700936	0.00479293	0.476697	0.0269463	0.313813	0.0337
80306	MED28	0.57914	0.0116852	1.15826	7.97607e-05	0.312456	0.0212
4758	NEU1	0.744023	0.0128105	1.12078	0.000633207	0.312438	0.0176
4726	NDUFS6	0.449486	0.0328827	0.430987	0.0287591	0.311544	0.0215
6652	SORD	0.970132	0.00417314	0.449263	0.023235	0.309811	0.0255
80139	ZNF703	-1.08574	0.00231768	-1.73379	5.7142e-05	0.30954	0.0317
6284	S100A13	0.740105	0.00461442	0.56356	0.0144924	0.308904	0.0288
1603	DAD1	0.716772	0.00158788	0.464709	0.0135139	0.307967	0.0483
23585	TMEM50A	0.548549	0.00773571	0.772718	0.000538749	0.305403	0.0285
222962	SLC29A4	0.689969	0.0276145	0.827415	0.00706004	0.304918	0.0203
521	ATP5ME	0.712912	0.00266026	0.673645	0.00160664	0.303906	0.0238
64976	MRPL40	0.671124	0.00324382	1.02563	0.000110197	0.303674	0.0282
57111	RAB25	0.545183	0.0151517	0.976803	0.000235429	0.303251	0.0258
10920	COPS8	0.574634	0.0309846	1.00229	0.000499004	0.303191	0.0226
56915	EXOSC5	0.62151	0.00686985	0.639875	0.00368507	0.301365	0.0334
11338	U2AF2	0.778197	0.029565	-0.589409	0.0458348	0.301136	0.0407
10007	GNPDA1	1.33506	0.000342	0.724448	0.00977876	0.30047	0.0288
64781	CERK	-0.648251	0.0114176	-1.50841	2.79021e-05	0.299344	0.0341
79719	AAGAB	0.878699	0.00234131	0.733926	0.00444573	0.298492	0.0239
439	ASNA1	0.51254	0.0470061	0.798401	0.00286661	0.298339	0.044
221092	HNRNPUL2	0.480304	0.0497457	-0.548362	0.0437163	0.298078	0.0219
1666	DECR1	0.705966	0.00335024	0.779641	0.00107776	0.297955	0.0289
56983	POGLUT1	1.02537	0.000336	0.709118	0.00295947	0.297744	0.0247
191	AHCY	0.476469	0.0202128	0.407867	0.0308525	0.28925	0.0496
27230	SERP1	0.599546	0.0192373	0.643622	0.00881946	0.287473	0.032
51124	IER3IP1	0.763113	0.020457	1.09644	0.00156934	0.287222	0.0421
10159	ATP6AP2	0.831619	0.00101928	0.39006	0.0476441	0.285779	0.0492
23324	MAN2B2	0.889881	0.00743473	0.778386	0.0105534	0.285629	0.0363
5255	PHKA1	0.64033	0.0126841	-0.780821	0.0462746	0.282498	0.0424
146057	TTBK2	-0.958958	0.00195683	-0.988978	0.000956599	0.27956	0.0302
7295	TXN	0.762922	0.0048277	1.15216	0.000189626	0.277244	0.0447
124540	MSI2	-0.850603	0.00821513	-1.91323	1.73846e-06	0.276593	0.0428
55111	PLEKHJ1	0.739347	0.00430724	1.11088	0.000171805	0.276428	0.0488
79137	RETREG2	0.527926	0.028405	0.610671	0.00898573	0.275775	0.0356
4860	PNP	0.644766	0.0103153	0.795278	0.0018475	0.275659	0.0352
65265	C8orf33	1.14283	0.000523	1.45829	5.37512e-05	0.275381	0.0388
51013	EXOSC1	0.473927	0.0368128	1.08321	0.000148806	0.269568	0.0419
26519	TIMM10	0.53751	0.0353236	0.693865	0.00618288	0.26822	0.0427
9414	TJP2	-1.00283	0.00231768	-1.97048	1.42599e-05	0.26745	0.0461
79627	OGFRL1	1.55646	0.000742	1.58155	0.000367548	0.265971	0.0473
80273	GRPEL1	0.530224	0.0274956	1.06317	0.000242546	0.259785	0.0364
30851	TAX1BP3	0.715683	0.00306466	0.837424	0.000659272	0.258728	0.0491
81572	PDRG1	0.61151	0.0154183	1.54641	2.31329e-05	0.258722	0.0422
4708	NDUFB2	0.676953	0.00401692	0.710183	0.00183424	0.255011	0.0462
64326	COP1	-1.25024	0.000159	-2.33252	1.43673e-06	-0.246996	0.0433
10248	POP7	-0.584204	0.00821513	-0.52538	0.0099604	-0.256745	0.0412
58155	PTBP2	-0.627137	0.048235	-1.24126	0.000615141	-0.257833	0.0467
167227	DCP2	-0.806481	0.00867772	-0.808714	0.000808878	-0.261199	0.0437
4331	MNAT1	-1.62667	0.000123	-1.43948	0.000139185	-0.267323	0.042
5889	RAD51C	-0.750006	0.00188087	-0.956799	0.000209484	-0.267601	0.0479
96459	FNIP1	-3.05102	1.56e-05	-3.35866	4.1995e-06	-0.269908	0.0422
9531	BAG3	-0.468284	0.0255521	-1.72044	3.8539e-06	-0.27426	0.0402
166647	ADGRA3	-0.806338	0.00222635	-1.4817	2.11216e-05	-0.282618	0.0484
8723	SNX4	-0.688661	0.017512	-0.610692	0.0225949	-0.284047	0.0394
10730	YME1L1	1.12809	0.00504802	1.99238	6.87324e-05	-0.295261	0.0262
9261	MAPKAPK2	-0.764778	0.00179348	-0.94036	0.0181699	-0.296809	0.0278
122786	FRMD6	-1.59566	1.43e-05	-2.08201	1.35228e-06	-0.296976	0.0319
10023	FRAT1	-0.593045	0.0496743	-0.777712	0.00880718	-0.298102	0.0464
8526	DGKE	-0.892835	0.0138543	-1.38116	0.000581986	-0.303134	0.0431
26003	GORASP2	-0.595909	0.00880745	0.544751	0.0326365	-0.30597	0.0191
94081	SFXN1	-1.74088	3.03e-05	-3.81935	1.60295e-07	-0.306219	0.0205
54788	DNAJB12	-0.825158	0.0297588	-0.667568	0.0118551	-0.307962	0.0183
55249	YY1AP1	-0.531842	0.0340294	0.860773	0.00142158	-0.308699	0.04
32	ACACB	-0.796689	0.0302949	-0.683508	0.0446685	-0.311379	0.0461
9063	PIAS2	-1.55053	0.001456	-0.848	0.000943745	-0.312449	0.0423
29896	TRA2A	1.56161	0.00646518	2.61131	1.94045e-05	-0.312957	0.049
23312	DMXL2	-1.23628	0.00299851	-1.45077	0.000629177	-0.314423	0.0448
124411	ZNF720	-1.79279	0.000151	-1.96068	4.17128e-05	-0.317923	0.0167
10735	STAG2	-0.764527	0.00167087	-0.994809	0.000217793	-0.318122	0.0487
991	CDC20	-0.736256	0.00995184	-0.550482	0.0314223	-0.318834	0.0309
4682	NUBP1	-0.632619	0.0153478	-0.7067	0.00540568	-0.320763	0.0262
221150	SKA3	-0.585241	0.0357115	-0.547591	0.0351951	-0.321607	0.0323
79718	TBL1XR1	-0.69547	0.00415359	-0.738278	0.0017662	-0.322401	0.0178
9209	LRRFIP2	-1.24477	0.000845	-0.981405	0.00232656	-0.322645	0.0264
51100	SH3GLB1	0.860361	0.000731	0.521761	0.0497816	-0.323367	0.0266
79954	NOL10	-0.683071	0.00958258	-1.3594	6.48197e-05	-0.324635	0.0243
54926	UBE2R2	-1.05516	0.000197	-0.810711	0.000622012	-0.32591	0.0152
55133	SRBD1	-1.1585	0.000501	-1.65137	2.41947e-05	-0.32805	0.0467
3161	HMMR	-1.38674	3.69e-05	-1.15699	6.07862e-05	-0.328752	0.0253
143458	LDLRAD3	-1.83621	0.00021	-1.67417	0.000200852	-0.331306	0.0164
2140	EYA3	-0.671163	0.0144165	-0.983812	0.000884601	-0.334926	0.0395
23078	VWA8	-0.930022	0.0445679	-1.92629	0.000398078	-0.335131	0.0183
84881	RPUSD4	-0.82245	0.0199192	-1.01852	0.00391803	-0.335136	0.0317
8826	IQGAP1	0.624844	0.014874	-1.34298	0.000147946	-0.339231	0.0282
10254	STAM2	-1.31467	0.0049283	-1.49367	0.000214376	-0.339388	0.0356
79982	DNAJB14	-0.616183	0.0135132	-0.455051	0.0431335	-0.339682	0.0174
7320	UBE2B	-0.868436	0.00117408	1.0685	0.000344326	-0.34006	0.0234
51379	CRLF3	-0.884172	0.00168901	-0.473834	0.0375034	-0.341865	0.0387
23326	USP22	-0.460818	0.0388761	0.685391	0.0312268	-0.34277	0.0146
55069	TMEM248	-0.670408	0.00495215	-0.580642	0.00750444	-0.344073	0.0185
57761	TRIB3	-0.966799	0.000658	1.08948	0.000157563	-0.344948	0.0218
11335	CBX3	-0.948214	0.0242773	-1.70077	0.000441669	-0.34871	0.0161
55100	WDR70	-2.73067	9.3e-05	-4.11064	3.1095e-06	-0.349275	0.029
55180	LINS1	-1.08758	0.00615334	1.69288	0.000622539	-0.350039	0.0145
83737	ITCH	-1.66227	0.000317	-1.50645	0.000333943	-0.350937	0.0397
91746	YTHDC1	-0.596293	0.0107158	0.809759	0.0186113	-0.35194	0.0331
51663	ZFR	-0.883977	0.00076	0.778975	0.00250022	-0.353367	0.0152
29102	DROSHA	-0.83246	0.0193065	-1.73692	0.000111898	-0.35424	0.0135
24144	TFIP11	-0.66424	0.0343813	-0.809489	0.00839837	-0.354812	0.0471
4779	NFE2L1	0.609967	0.00508933	1.76781	2.68193e-06	-0.355058	0.0332
60313	GPBP1L1	-1.36215	0.000108	-0.490208	0.0324784	-0.355457	0.0234
5962	RDX	-0.451048	0.0272232	-0.717729	0.00963583	-0.356216	0.0273
7332	UBE2L3	0.897021	0.0139847	-0.498247	0.0146007	-0.3582	0.0213
8634	RTCA	-0.884402	0.00220778	-0.666385	0.00777778	-0.358407	0.0458
79139	DERL1	-0.404385	0.0489939	-0.564355	0.0235696	-0.359114	0.00949
6840	SVIL	-2.30895	6.69e-05	-2.7848	9.32539e-06	-0.359602	0.0184
202	CRYBG1	-1.23777	0.0100634	-2.53016	5.76747e-05	-0.361006	0.0374
152503	SH3D19	-0.927179	0.0226295	-2.12075	7.5028e-05	-0.36129	0.0338
29901	SAC3D1	0.731943	0.00486917	-0.459127	0.040208	-0.363836	0.0203
1039	CDR2	-0.890027	0.0039632	0.661994	0.0143174	-0.365396	0.0136
4173	MCM4	1.03611	0.00265794	-1.7992	2.51955e-06	-0.365524	0.0251
23348	DOCK9	-1.51334	0.000153	-2.33926	4.38588e-06	-0.366779	0.0151
5533	PPP3CC	-1.16658	0.000731	-0.920371	0.00198162	-0.368747	0.0235
4886	NPY1R	-0.675606	0.00499805	-2.25183	1.16259e-06	-0.368877	0.0213
9364	RAB28	-1.91254	0.00034	-1.73085	4.87506e-05	-0.369052	0.0119
5717	PSMD11	1.10725	0.0302467	-1.03846	0.00013823	-0.371888	0.0127
6259	RYK	-1.93719	4.3e-05	-1.90691	2.30634e-05	-0.372657	0.0187
79675	FASTKD1	-1.06889	0.00150277	-2.43937	3.4818e-06	-0.37317	0.0253
23165	NUP205	-0.609671	0.0211498	-1.29291	0.000112964	-0.373735	0.0105
79882	ZC3H14	-1.22759	0.00027	-1.30774	5.23505e-05	-0.37509	0.00714
4194	MDM4	-1.17381	0.00822173	0.809467	0.00486301	-0.375669	0.0118
2004	ELK3	-0.560328	0.0391528	-1.19854	0.0002596	-0.375853	0.016
23029	RBM34	-0.50705	0.0170356	0.824506	0.000540172	-0.37638	0.0464
7988	ZNF212	-0.741011	0.0250304	-0.819924	0.0100371	-0.3774	0.0225
23473	CAPN7	-0.693828	0.0186005	-0.995277	0.00140829	-0.377782	0.0136
25957	PNISR	-1.7966	0.000438	-2.02215	0.000103704	-0.378204	0.037
55023	PHIP	-0.879387	0.0266047	-1.4969	0.000719139	-0.378897	0.0255
5935	RBM3	1.67042	5.23e-05	0.57181	0.023937	-0.379853	0.00684
5701	PSMC2	0.602824	0.00677406	-0.783788	0.000794755	-0.381064	0.00965
28962	OSTM1	0.799874	0.0326571	-0.676417	0.0123424	-0.381246	0.0423
91147	TMEM67	-0.813616	0.031398	-0.972906	0.0083965	-0.381777	0.0423
339500	ZNF678	-2.01477	0.00636777	-1.93402	0.00521631	-0.38424	0.00819
152189	CMTM8	-1.7045	5.32e-05	-1.41798	8.71902e-05	-0.384923	0.021
406	ARNTL	-1.31862	0.00793025	-0.541291	0.0315444	-0.38521	0.0258
9716	AQR	-0.558475	0.0340854	-1.54886	3.58363e-05	-0.385523	0.0114
55233	MOB1A	0.849338	0.000946	0.558189	0.00791828	-0.386212	0.0143
115548	FCHO2	-3.46562	9.09e-06	-4.14159	1.46257e-06	-0.388612	0.0192
55756	INTS9	-1.37876	0.00871856	-2.16377	0.000295184	-0.390362	0.0253
58497	PRUNE1	-0.789524	0.00387306	-1.06929	0.00764955	-0.391063	0.00783
64786	TBC1D15	-0.734953	0.00226147	-1.33998	2.26576e-05	-0.391646	0.0378
145581	LRFN5	-1.34334	0.000845	-2.16414	1.83335e-05	-0.393109	0.0263
10048	RANBP9	-1.2531	0.000305	-1.8848	0.000119415	-0.393862	0.0124
1665	DHX15	-0.743043	0.00271023	-2.38195	8.29527e-07	-0.395118	0.0102
23598	PATZ1	-1.75416	8.58e-06	-0.74609	0.00127839	-0.39587	0.0358
2122	MECOM	-1.46364	0.000523	-1.61779	0.000359565	-0.395992	0.00617
23111	SPART	-0.90209	0.00391608	-2.0863	8.58626e-06	-0.39631	0.0298
144455	E2F7	1.23401	0.000127	-0.542035	0.0133152	-0.396504	0.0219
8405	SPOP	-0.953206	0.00265124	-0.697074	0.0109163	-0.39729	0.0416
10775	POP4	1.47593	0.00404461	-0.541383	0.00995923	-0.397303	0.0138
2099	ESR1	-2.67872	1.46e-06	-3.69932	1.16105e-07	-0.398077	0.00671
403341	ZBTB34	-1.60716	5.13e-05	-1.17554	0.00020357	-0.398371	0.0239
1488	CTBP2	-1.79525	1.15e-05	-1.50789	1.73336e-05	-0.398898	0.00919
8672	EIF4G3	-0.773206	0.0497583	-2.28663	4.10885e-05	-0.399687	0.014
55755	CDK5RAP2	-1.05579	0.020686	-0.804693	0.00112304	-0.401203	0.0082
10939	AFG3L2	-0.763023	0.00164166	-0.786157	0.000794798	-0.40122	0.0189
79086	SMIM7	-1.71932	0.000702	-1.99335	0.000138156	-0.403619	0.0114
80071	CCDC15	-1.26092	0.00107489	-1.65227	9.45504e-05	-0.404565	0.0425
5049	PAFAH1B2	-0.484647	0.0322705	-0.472579	0.0259666	-0.408333	0.0101
6541	SLC7A1	-0.910813	0.000435	1.7317	8.74774e-06	-0.410025	0.00439
285489	DOK7	-1.47554	0.00073	-3.57572	1.22105e-06	-0.410796	0.0174
9859	CEP170	-2.59188	0.000633	-2.09349	0.00148229	-0.410808	0.00737
4628	MYH10	-0.943197	0.00232919	-2.46529	2.28888e-06	-0.412645	0.0105
9184	BUB3	-0.935957	0.00054	-1.40407	1.85473e-05	-0.413998	0.00786
54910	SEMA4C	-2.29308	2.28e-06	-2.6674	4.3984e-07	-0.414063	0.0204
253461	ZBTB38	0.667203	0.0256961	1.27702	0.000510365	-0.41548	0.0468
6627	SNRPA1	1.12945	0.0387984	-0.595434	0.00835677	-0.416279	0.00516
57659	ZBTB4	-1.09462	0.00325913	-0.998934	0.00226907	-0.416435	0.0118
23517	MTREX	-0.759263	0.00660113	-1.72565	1.70884e-05	-0.416882	0.0126
25902	MTHFD1L	-0.554306	0.0152524	1.33817	2.97095e-05	-0.417947	0.00464
5286	PIK3C2A	-0.982528	0.0183495	-0.942335	0.00507391	-0.41798	0.0155
5583	PRKCH	-2.08061	0.000971	-3.70804	1.09262e-05	-0.418695	0.0185
158	ADSL	-0.532042	0.0135132	-1.08791	0.000111898	-0.41874	0.00906
51678	MPP6	-1.37044	0.00241528	-0.88557	0.0196981	-0.42017	0.036
27130	INVS	-0.896474	0.0385102	-1.58569	0.000936371	-0.420694	0.0456
9650	MTFR1	-0.58796	0.0463875	-0.558334	0.0429304	-0.420707	0.0167
79657	RPAP3	-0.587699	0.0336675	-1.70767	2.56519e-05	-0.421383	0.00535
8239	USP9X	-0.485278	0.0243984	-1.44265	1.43927e-05	-0.425421	0.0173
84108	PCGF6	-1.37369	0.00315613	-1.28285	0.00299046	-0.425554	0.0267
4883	NPR3	-1.22263	0.00247762	-0.912806	0.00911879	-0.425755	0.0146
2963	GTF2F2	-0.766984	0.0268064	-0.742433	0.0221749	-0.426096	0.0184
23223	RRP12	0.938872	0.0355877	0.549136	0.0129415	-0.426426	0.00802
55388	MCM10	-0.690756	0.0102673	-1.24762	0.000135845	-0.428551	0.00786
57545	CC2D2A	-1.13954	0.0155629	-1.45242	0.00242351	-0.429917	0.0244
5747	PTK2	-1.95839	0.00035	-2.85138	3.08509e-06	-0.432775	0.0154
22800	RRAS2	-2.40914	1.94e-05	-2.41936	9.24091e-06	-0.434755	0.00711
342371	ATXN1L	-1.04263	0.000612	-0.898069	0.000930609	-0.435084	0.0124
56984	PSMG2	-0.574491	0.00731308	-0.848896	0.000362004	-0.435236	0.00393
7182	NR2C2	-2.49604	1.29e-05	-2.04409	2.36733e-05	-0.435472	0.0459
79446	WDR25	-0.587446	0.0391528	-0.618959	0.0216005	-0.436183	0.0237
49855	SCAPER	-2.09254	0.00187484	-1.76395	0.00336516	-0.436592	0.00598
4651	MYO10	-0.722225	0.0429785	-0.982777	0.00583974	-0.437609	0.0107
5631	PRPS1	0.852101	0.0259627	-0.541638	0.0208153	-0.437672	0.042
22839	DLGAP4	-0.803388	0.0102475	1.847	0.000296723	-0.437693	0.0148
11056	DDX52	-0.902282	0.040107	-1.0386	0.0213429	-0.437949	0.0158
64927	TTC23	-1.01526	0.0408588	0.50344	0.0251711	-0.438496	0.00876
10725	NFAT5	-1.76113	1.28e-05	-1.9073	3.78195e-06	-0.440439	0.00657
3308	HSPA4	-0.432934	0.0309996	-1.8112	7.00523e-06	-0.440573	0.00477
8452	CUL3	-1.03196	0.000311	-2.19272	0.000210821	-0.440658	0.00366
150962	PUS10	-1.11694	0.00234131	-1.48866	0.000284379	-0.44116	0.00879
4928	NUP98	-1.50463	0.00035	-1.89246	3.92838e-05	-0.441515	0.008
140838	NANP	-1.32946	0.000457	-0.8404	0.00512518	-0.441558	0.0497
8295	TRRAP	-0.827241	0.00834441	-1.89571	2.11891e-05	-0.442129	0.0119
8624	PSMG1	0.882207	0.0185468	-1.02492	0.00530301	-0.442262	0.0187
130574	LYPD6	-1.15213	0.0375871	-1.23588	0.0188439	-0.442546	0.0466
25842	ASF1A	-0.612515	0.0206058	-1.00797	0.00278258	-0.445942	0.0363
205564	SENP5	-1.32355	7.18e-05	0.732339	0.00287734	-0.446434	0.027
23122	CLASP2	-1.565	0.000371	-1.43325	7.42606e-05	-0.446921	0.00859
22876	INPP5F	-0.865444	0.0087542	-1.23357	0.0005788	-0.447884	0.0389
56255	TMX4	0.888397	0.00337678	1.12928	0.000416696	-0.448227	0.0246
9821	RB1CC1	-0.721492	0.038168	-1.16684	0.00167807	-0.450264	0.0174
1479	CSTF3	-0.589684	0.0461142	-1.35411	0.000595503	-0.450723	0.00537
58516	SINHCAF	-1.02829	0.000813	0.811184	0.0008854	-0.451092	0.00949
54799	MBTD1	-1.52774	0.00206685	-1.75889	5.10102e-05	-0.451179	0.0229
7112	TMPO	-1.44567	0.00018	-2.66976	1.68524e-06	-0.451443	0.0104
55973	BCAP29	1.01229	0.001088	1.6214	2.02351e-05	-0.451722	0.028
151194	METTL21A	-1.32774	0.000428	1.66725	0.000207106	-0.453432	0.0197
140890	SREK1	0.671968	0.00357736	0.690904	0.00184857	-0.453838	0.00614
79631	EFL1	-1.03275	0.00587473	-1.0853	0.00271968	-0.454263	0.00298
128061	C1orf131	-0.645114	0.00841794	-0.531955	0.0164484	-0.454354	0.00347
9937	DCLRE1A	-0.634242	0.0117853	-0.826728	0.00151419	-0.455106	0.0494
1453	CSNK1D	-0.796013	0.0062351	0.752074	0.00237357	-0.459068	0.0435
84549	MAK16	-0.888257	0.00104414	0.465571	0.0289532	-0.459788	0.0038
56261	GPCPD1	-1.01089	0.015197	1.42204	0.00163088	-0.460281	0.00896
157697	ERICH1	-1.70795	0.00204079	-2.07824	0.000320621	-0.460884	0.00496
11137	PWP1	-0.406941	0.0488936	-0.564816	0.00618336	-0.461415	0.00394
53407	STX18	-1.83948	3.48e-05	-0.563049	0.0310791	-0.461464	0.0169
84282	RNF135	1.12871	0.00113058	1.37478	1.79871e-05	-0.461635	0.0411
1544	CYP1A2	2.18571	0.00025	-1.50338	0.00168055	-0.462515	0.00878
9686	VGLL4	-1.86298	9.47e-06	-0.722976	0.0026099	-0.464569	0.00491
22874	PLEKHA6	-0.949016	0.0128619	-1.00006	0.00632357	-0.464773	0.00461
57634	EP400	-1.51437	0.00637136	-1.31225	0.00377774	-0.464994	0.00214
114883	OSBPL9	-0.732695	0.00227399	-0.971859	0.000196958	-0.465165	0.00314
374986	MIGA1	-1.43883	0.000227	-1.52199	7.97607e-05	-0.465264	0.0484
55732	C1orf112	-0.680151	0.0136168	-1.66161	2.47305e-05	-0.465618	0.00833
51082	POLR1D	-1.30055	3.94e-05	2.08694	4.83402e-06	-0.465702	0.0112
5347	PLK1	-1.91003	5.77e-05	-1.06091	0.00153169	-0.466144	0.00986
55288	RHOT1	-1.0519	0.00022	-0.786004	0.000837355	-0.466453	0.0275
22875	ENPP4	-1.19919	0.00919822	-2.27823	8.44633e-05	-0.469233	0.0182
55789	DEPDC1B	-0.988112	0.00278574	-0.776789	0.00753931	-0.469367	0.0166
64215	DNAJC1	-0.91596	0.000909	-0.77123	0.0124494	-0.469749	0.00427
126282	TNFAIP8L1	-2.2282	0.00015	-1.81052	0.000318771	-0.469855	0.0393
23512	SUZ12	-0.883916	0.001654	-1.20908	0.000112034	-0.469912	0.00541
8303	SNN	0.565914	0.0461979	-0.930674	0.00198162	-0.470245	0.00843
4781	NFIB	-1.19472	0.000144	-1.98916	2.60601e-06	-0.470525	0.00938
10690	FUT9	-2.41052	0.000162	-4.9283	8.78859e-07	-0.471473	0.0189
54856	GON4L	-1.82467	0.000133	-0.946713	0.00526438	-0.471514	0.00315
23335	WDR7	-2.25979	0.000646	-3.50027	1.80484e-05	-0.471872	0.027
8874	ARHGEF7	-2.92845	0.000319	-2.95242	0.000159947	-0.472551	0.0247
2776	GNAQ	-0.955528	0.000946	-2.80496	4.28055e-07	-0.47308	0.015
9093	DNAJA3	-0.814252	0.00109295	-0.632469	0.00329406	-0.473298	0.0133
57117	INTS12	-0.812385	0.00202672	0.712437	0.00283477	-0.473347	0.00432
59349	KLHL12	-0.618216	0.013334	0.712746	0.00381554	-0.474167	0.00333
57534	MIB1	-0.643901	0.0436442	-1.2674	0.000549736	-0.474332	0.0403
55112	WDR60	-1.83769	0.00036	-2.16828	6.26348e-05	-0.475212	0.00342
79161	TMEM243	-0.426573	0.042051	-0.828648	0.000565858	-0.475572	0.00441
51460	SFMBT1	-2.05068	0.000297	-1.98448	0.000196139	-0.475663	0.049
23158	TBC1D9	-2.02834	4.42e-06	-1.36081	2.6087e-05	-0.47583	0.00232
2932	GSK3B	-1.89028	6.31e-05	-1.99425	2.12975e-05	-0.476589	0.00701
6882	TAF11	-0.500041	0.0260585	0.807539	0.013008	-0.477413	0.00518
4999	ORC2	-2.38402	3.31e-06	-1.47295	3.17859e-05	-0.477641	0.00227
23301	EHBP1	-2.02405	5.21e-05	-2.11292	1.85628e-05	-0.477956	0.00341
3009	HIST1H1B	-0.984292	0.00310677	-1.09096	0.000966831	-0.478434	0.0431
2000	ELF4	-0.669889	0.0268077	-1.29205	0.000307376	-0.478811	0.0147
23243	ANKRD28	-1.09447	0.00139619	-1.96035	1.54818e-05	-0.47901	0.00338
11193	WBP4	-2.61826	3.62e-05	-1.0621	0.00705102	-0.479597	0.00816
90025	UBE3D	-0.840782	0.0284083	-0.970283	0.00911299	-0.479719	0.0244
10240	MRPS31	-1.21787	0.000111	-1.62793	7.84059e-06	-0.481	0.00448
55818	KDM3A	-0.628723	0.0369544	-0.581129	0.0386498	-0.482601	0.0292
81555	YIPF5	1.01125	0.00411794	0.989979	0.00292789	-0.482876	0.0309
57007	ACKR3	-2.28388	1.57e-05	-2.97164	1.48406e-06	-0.483269	0.00332
143884	CWF19L2	-1.11666	0.0142428	-0.997049	0.017828	-0.48332	0.0343
51176	LEF1	-0.603024	0.0297928	-0.575653	0.0265142	-0.483538	0.00942
57228	SMAGP	-0.526274	0.0329105	-0.481746	0.0359468	-0.484528	0.0029
51762	RAB8B	-0.744418	0.017643	-1.36169	0.000249307	-0.484745	0.021
10600	USP16	-0.530882	0.021769	-0.764371	0.0016794	-0.485336	0.00359
10914	PAPOLA	-0.597625	0.0452011	-0.839992	0.00513921	-0.485459	0.0032
10299	MARCH6	-0.469341	0.0349702	-1.73926	9.88243e-05	-0.485648	0.0114
23200	ATP11B	-1.20618	0.00990527	-1.30159	0.00412392	-0.486094	0.0142
10733	PLK4	-2.30757	5.54e-06	-1.93311	7.84059e-06	-0.486484	0.0467
79064	TMEM223	-1.32225	0.000615	-1.35918	0.000277732	-0.486806	0.011
64151	NCAPG	-0.764596	0.00390404	-0.463136	0.0431255	-0.486952	0.00975
25896	INTS7	-0.843828	0.00272905	-0.795576	0.00241989	-0.486993	0.013
9320	TRIP12	-0.774446	0.00108002	-1.07018	6.65222e-05	-0.487195	0.0241
9700	ESPL1	-1.38441	0.000115	-1.81515	9.28132e-06	-0.487275	0.00429
5663	PSEN1	-0.731017	0.0268985	1.41117	0.000313434	-0.4874	0.0127
9295	SRSF11	-1.80237	0.000205	-1.78745	0.000109718	-0.487819	0.0128
6421	SFPQ	-0.578496	0.00920772	-2.14539	1.8224e-06	-0.488982	0.00328
7003	TEAD1	-1.48462	2.81e-05	-2.56571	5.31989e-07	-0.489376	0.0243
29843	SENP1	-1.03839	0.00591735	-1.01747	0.00426552	-0.48988	0.00348
23528	ZNF281	-1.30702	0.000624	-1.15468	0.000801367	-0.489932	0.00719
444	ASPH	0.702938	0.00313637	-0.786153	0.00955109	-0.490145	0.028
4853	NOTCH2	-0.854069	0.00280091	-1.28603	6.273e-05	-0.49035	0.00228
388677	NOTCH2NLA	-0.823722	0.00185714	-2.66622	2.45475e-05	-0.49035	0.00228
151648	SGO1	-0.703322	0.0108498	-1.37261	8.58304e-05	-0.49272	0.005
8065	CUL5	-0.499781	0.0254018	1.16797	0.000711805	-0.493281	0.00442
8315	BRAP	-0.793111	0.0443242	1.2327	0.000227956	-0.493393	0.00819
10904	BLCAP	0.587649	0.0213761	-0.815033	0.0020826	-0.493467	0.0242
91404	SESTD1	-1.00465	0.00269965	-1.53083	0.000119638	-0.49543	0.0335
55691	FRMD4A	-1.15418	0.00261471	-2.41576	1.08683e-05	-0.495719	0.0254
55728	N4BP2	-2.12908	0.00281755	-1.54826	0.00018852	-0.496628	0.0147
57223	PPP4R3B	-2.12142	0.000221	-2.14824	0.000102341	-0.496994	0.0233
3419	IDH3A	-0.386488	0.0498603	-0.928791	0.000169036	-0.497251	0.00245
64081	PBLD	0.507587	0.0330956	0.758284	0.00229885	-0.497317	0.0322
57678	GPAM	1.26377	0.000276	1.57285	3.30253e-05	-0.497499	0.0033
25936	NSL1	-0.863905	0.00759899	-0.834498	0.00603569	-0.497854	0.0257
51182	HSPA14	-2.2414	0.000232	-2.55274	4.97417e-05	-0.49787	0.00188
54908	SPDL1	-0.447634	0.0219087	0.490766	0.00905889	-0.498003	0.00224
2130	EWSR1	-1.06585	0.002573	-1.29132	0.000283741	-0.499074	0.00182
55791	LRIF1	-1.43342	0.00111264	1.04405	0.00500628	-0.499361	0.00681
54704	PDP1	-1.27916	0.000733	-1.46874	0.00015468	-0.499874	0.0218
257019	FRMD3	-0.664472	0.0406408	-0.616867	0.0415562	-0.500831	0.0227
162989	DEDD2	1.25377	0.004019	0.77506	0.0369267	-0.500913	0.0283
4144	MAT2A	-1.50587	1.5e-05	-2.50305	4.02421e-07	-0.501917	0.0136
57600	FNIP2	-1.38987	0.00354628	-1.74506	0.000479785	-0.501962	0.0198
80315	CPEB4	-1.01743	0.0118879	-1.47575	0.000747432	-0.502071	0.00733
6294	SAFB	-0.735535	0.00636244	-1.5576	2.59868e-05	-0.502081	0.00454
9489	PGS1	-0.880164	0.00156055	-1.62071	1.43992e-05	-0.503905	0.0379
29979	UBQLN1	-0.453075	0.0391998	-1.30872	3.35632e-05	-0.504005	0.00197
23609	MKRN2	-0.473931	0.0300842	1.36553	3.55242e-05	-0.504205	0.00628
3760	KCNJ3	-1.02647	0.0353326	-0.958815	0.0350842	-0.504558	0.00391
6872	TAF1	-0.968539	0.0277804	-1.07634	0.0110385	-0.504614	0.0231
23331	TTC28	-1.08732	0.000649	-0.833117	0.0021372	-0.505588	0.00237
55161	TMEM33	0.58047	0.0238441	-0.479303	0.0404557	-0.505912	0.0127
9738	CCP110	-0.758991	0.00537768	-0.708574	0.00519356	-0.506352	0.00875
51312	SLC25A37	-1.07045	0.0120835	-1.2255	0.0035779	-0.507402	0.0029
23244	PDS5A	-0.930819	0.00180071	-1.35521	8.08589e-05	-0.509999	0.0099
8776	MTMR1	-0.399284	0.0423796	-0.717607	0.000969993	-0.510946	0.00221
89958	SAPCD2	-0.601281	0.0083888	-0.756231	0.00128024	-0.511777	0.00949
54537	SHLD2	-0.541113	0.0118451	-0.996398	0.00014244	-0.511851	0.00155
84902	CEP89	-0.979684	0.000825	-0.874263	0.0010101	-0.512671	0.0236
10296	MAEA	-1.05731	0.000357	-1.1738	9.29217e-05	-0.513346	0.00428
1965	EIF2S1	0.990351	0.000267	1.27458	2.49402e-05	-0.513634	0.0019
55692	LUC7L	1.22751	0.00176375	0.957614	0.001438	-0.513995	0.00359
54822	TRPM7	-1.03701	0.00308052	-2.14739	1.91108e-05	-0.514177	0.00466
54841	BIVM	-1.34938	0.00917902	-1.04952	0.0241331	-0.517084	0.0198
7187	TRAF3	-1.57343	0.00306012	-2.25688	0.000159876	-0.517329	0.00304
23431	AP4E1	-0.611024	0.011932	-1.77817	7.34301e-05	-0.51741	0.00261
27085	MTBP	-1.32415	0.00118637	-1.22208	0.00118685	-0.51748	0.00914
8633	UNC5C	-1.62443	0.000687	-1.37833	0.00115963	-0.51812	0.0187
5074	PAWR	-1.54599	0.000731	-0.905163	0.000621791	-0.51935	0.00129
3930	LBR	-0.677174	0.015367	-0.495655	0.049735	-0.520812	0.0229
27131	SNX5	2.0064	1.28e-05	2.26985	2.82476e-06	-0.520938	0.00166
56475	RPRM	-1.21834	0.00109295	-1.06793	0.00152229	-0.521098	0.00322
1894	ECT2	-0.990808	0.00104277	-1.88305	7.71075e-06	-0.52157	0.00315
1452	CSNK1A1	-0.701772	0.00327649	-0.563042	0.0215683	-0.524754	0.00513
9231	DLG5	-0.796193	0.00120366	-0.869225	0.000383621	-0.524778	0.00406
84124	ZNF394	-1.21508	0.00143387	0.921981	0.00989342	-0.525331	0.0021
9989	PPP4R1	-0.79033	0.00181343	-1.24474	4.82069e-05	-0.52563	0.00211
337876	CHSY3	-1.03526	0.0197901	-0.914157	0.0260306	-0.525783	0.00955
55785	FGD6	-1.17189	0.000331	-1.04524	0.000393821	-0.52605	0.00621
84083	ZRANB3	-2.19864	0.000259	-2.83369	2.39813e-05	-0.527171	0.00566
57684	ZBTB26	-1.64882	0.0036573	-1.59245	0.00282015	-0.527391	0.00354
387119	CEP85L	-1.03432	0.0303934	-1.17531	0.0107966	-0.527629	0.0183
57187	THOC2	-0.527488	0.0197598	-1.39483	0.000157112	-0.529081	0.00134
23133	PHF8	-0.809829	0.024876	-0.661654	0.0464127	-0.529859	0.022
196527	ANO6	-0.81495	0.00473581	-1.99189	7.36824e-06	-0.530603	0.00291
23774	BRD1	-2.34483	1.67e-05	-1.04009	0.00143769	-0.531476	0.00294
23119	HIC2	-0.712429	0.015802	-1.49392	8.42804e-05	-0.532017	0.00215
286410	ATP11C	-0.900276	0.00876599	-2.87361	2.64525e-06	-0.532281	0.00776
9836	LCMT2	-1.08498	0.00992733	-1.1806	0.00392111	-0.532524	0.00213
63929	XPNPEP3	-1.0166	0.00667371	-1.02354	0.00411419	-0.532683	0.00142
158880	USP51	-1.07353	0.00712544	-0.78052	0.0269856	-0.533009	0.016
65125	WNK1	-0.779765	0.00159235	-0.657113	0.00285129	-0.533232	0.00106
54962	TIPIN	-0.99495	0.000778	-0.865859	0.00111907	-0.533278	0.0014
3688	ITGB1	-0.951093	0.00143299	-0.862243	0.00160987	-0.533926	0.0144
10551	AGR2	0.468287	0.0178851	-0.428902	0.0195711	-0.534013	0.0286
5558	PRIM2	-1.19686	0.000897	-1.95061	1.81344e-05	-0.53412	0.0121
2972	BRF1	-1.40809	0.002813	-0.937673	0.0191143	-0.534157	0.00151
57575	PCDH10	-3.24491	4.31e-06	-4.49836	3.47411e-07	-0.535197	0.00253
10409	BASP1	-0.935468	0.000459	-0.472762	0.018334	-0.535976	0.00237
80013	MINDY3	-0.496875	0.0345443	-0.646061	0.00575228	-0.538825	0.0036
23140	ZZEF1	-0.794636	0.0174964	-1.1026	0.0016209	-0.539275	0.0235
55226	NAT10	-0.596963	0.0438366	-0.977906	0.00188332	-0.539532	0.00113
9960	USP3	-0.755309	0.00152973	-2.03361	8.91388e-05	-0.539863	0.00157
5782	PTPN12	-1.52236	6.36e-05	-1.33504	7.47606e-05	-0.54193	0.00317
5465	PPARA	-0.788132	0.0141091	-1.1828	0.00073175	-0.54335	0.00353
4649	MYO9A	-1.08806	0.00381731	-1.38445	0.000475745	-0.543444	0.00378
9373	PLAA	-0.660754	0.0399427	-0.822154	0.00392545	-0.544191	0.00285
26503	SLC17A5	-1.65465	0.00327649	-1.9625	0.000226227	-0.544227	0.00772
23761	PISD	-1.0966	0.00183819	-0.970603	0.00242439	-0.545355	0.0119
8725	URI1	0.959655	0.0478874	-0.772715	0.00148203	-0.545779	0.00488
9923	ZBTB40	-1.20006	0.00834441	-1.16529	0.00648045	-0.548217	0.00165
79670	TUT7	-2.04732	0.00170409	-2.75992	0.000128682	-0.548877	0.00282
8567	MADD	-0.694003	0.00708222	-0.762232	0.00253047	-0.549836	0.0136
57679	ALS2	-1.12753	0.00455733	0.810425	0.0194731	-0.550878	0.0479
440590	ZYG11A	-1.90403	0.000226	-1.7408	0.000213855	-0.551292	0.00969
8021	NUP214	-1.03077	0.0166691	-2.24535	6.98412e-05	-0.551508	0.0146
84722	PSRC1	-1.54991	0.000277	-1.11735	0.00137749	-0.551687	0.00221
1374	CPT1A	-0.594991	0.0404648	-2.20407	4.76365e-06	-0.551985	0.00113
26097	CHTOP	-0.847377	0.000853	-0.632933	0.00330382	-0.552476	0.00191
29890	RBM15B	0.812756	0.0117738	0.566224	0.0267498	-0.553689	0.00158
57082	KNL1	-1.52709	0.000326	-2.30999	1.07226e-05	-0.555516	0.00775
8087	FXR1	-0.884515	0.00117855	-0.805713	0.00453244	-0.555706	0.00179
996	CDC27	-1.5054	8.48e-05	-1.60928	2.6087e-05	-0.555817	0.00924
29117	BRD7	-0.573083	0.0143063	-0.946335	0.000386329	-0.556432	0.00297
23214	XPO6	-0.93839	0.00158561	-0.695383	0.0062735	-0.556826	0.0118
23350	U2SURP	-1.28733	5.32e-05	-3.14191	5.12697e-06	-0.557299	0.00134
60492	CCDC90B	1.54381	0.021232	1.28838	0.0364429	-0.558274	0.0015
6482	ST3GAL1	-1.03637	0.0171028	-0.813234	0.0400748	-0.559126	0.0168
9831	ZNF623	-1.39493	0.000862	-1.06863	0.00284837	-0.55937	0.00184
11214	AKAP13	-2.61519	2.48e-06	-3.16865	4.02421e-07	-0.559416	0.00129
4325	MMP16	-2.12397	0.000752	-2.64281	9.14705e-05	-0.559433	0.00254
9604	RNF14	-0.481475	0.046605	-1.2064	0.000112849	-0.560243	0.011
8527	DGKD	-0.586939	0.007325	-1.18692	4.20637e-05	-0.560404	0.000976
7150	TOP1	-0.529652	0.0108471	-0.898182	0.000225634	-0.561535	0.00406
123228	SENP8	-0.489092	0.0473848	-1.28844	8.32906e-05	-0.562035	0.0179
23683	PRKD3	-1.43842	0.000179	-1.56459	5.16289e-05	-0.562857	0.00306
18	ABAT	0.646047	0.0489151	-1.16061	0.00167873	-0.563683	0.00177
55758	RCOR3	-1.17983	0.00251051	1.65029	6.36082e-05	-0.564276	0.0219
8050	PDHX	-0.653661	0.00311455	-0.500327	0.00979149	-0.564836	0.00335
55253	TYW1	-1.85893	0.000162	-2.17884	2.82671e-05	-0.565356	0.00636
5194	PEX13	-0.709459	0.0103179	-0.715266	0.0344081	-0.565504	0.00218
55604	CARMIL1	-2.67023	3.9e-05	-3.85596	1.78716e-06	-0.565667	0.019
79726	WDR59	-1.59734	0.00813037	-2.14619	2.88825e-05	-0.566104	0.00125
54888	NSUN2	-0.54393	0.0145763	-1.05113	0.000132518	-0.568803	0.00175
55578	SUPT20H	-1.81299	8.9e-06	-0.445353	0.0320427	-0.56938	0.00556
4810	NHS	-0.581647	0.0252193	-0.665495	0.00835677	-0.569485	0.00933
6542	SLC7A2	-0.816293	0.00691358	-1.04359	0.000916577	-0.570433	0.00413
79886	CAAP1	-1.16287	0.000688	-0.56251	0.0309505	-0.570829	0.00144
374378	GALNT18	-1.40094	0.000299	-1.78329	3.06233e-05	-0.570902	0.0205
11169	WDHD1	-0.753145	0.0118493	-1.47793	9.19434e-05	-0.571353	0.0266
23272	FAM208A	-1.18028	0.000564	-1.48976	6.21533e-05	-0.572101	0.00179
22930	RAB3GAP1	-0.673015	0.00465856	-0.524366	0.0129058	-0.572651	0.00195
4602	MYB	-1.51368	9.13e-05	-2.23784	3.46053e-06	-0.575277	0.0106
8925	HERC1	-1.11045	0.00102121	-2.96706	9.48318e-07	-0.575787	0.0144
84068	SLC10A7	-1.53502	0.000555	-1.28291	0.00103001	-0.577599	0.00315
29115	SAP30BP	-0.600308	0.0121444	0.828526	0.00107569	-0.578025	0.00249
29946	SERTAD3	-1.43583	0.00353759	-0.902827	0.0307966	-0.578066	0.00231
7625	ZNF74	1.2518	0.00169451	1.86369	6.54337e-05	-0.578485	0.00335
83695	RHNO1	-0.886659	0.0068532	-0.776982	0.00962496	-0.579786	0.000761
4001	LMNB1	-0.500032	0.02185	-1.42518	1.64297e-05	-0.582554	0.0273
10274	STAG1	-1.63131	2.66e-05	-2.60106	7.63518e-07	-0.58312	0.00179
80821	DDHD1	-1.49473	0.000126	-2.22839	4.44835e-06	-0.583485	0.0125
25782	RAB3GAP2	-1.15869	0.00113505	-1.33522	0.000245976	-0.583746	0.00724
7004	TEAD4	-1.71573	6.15e-05	-1.34579	0.000153893	-0.586831	0.00186
9527	GOSR1	-0.876281	0.00123556	0.723518	0.00494068	-0.587213	0.00225
10036	CHAF1A	-1.28006	0.000476	-1.85755	2.04787e-05	-0.588661	0.00221
84440	RAB11FIP4	-0.989337	0.0143678	-1.10458	0.00504355	-0.588839	0.00451
5530	PPP3CA	-0.839126	0.000726	-2.24038	6.93165e-07	-0.589319	0.00184
54464	XRN1	-1.21768	0.00518489	-2.96086	8.42932e-06	-0.591165	0.00649
7597	ZBTB25	-1.30161	0.000481	-1.10449	0.000811618	-0.592855	0.00334
79733	E2F8	-2.05038	0.000311	-1.8305	0.000363512	-0.593668	0.00295
79699	ZYG11B	-0.842522	0.00188123	-1.67568	1.05571e-05	-0.594425	0.000727
7813	EVI5	-0.989541	0.0310075	-1.21954	0.00692819	-0.595815	0.0143
8648	NCOA1	-1.15935	0.00398838	-3.49327	1.98725e-05	-0.599035	0.00265
55626	AMBRA1	-1.80199	0.000175	-1.65309	0.000160019	-0.599251	0.0151
5170	PDPK1	-1.23538	8e-05	-0.40134	0.0423142	-0.599559	0.0018
84955	NUDCD1	-0.806027	0.000823	-1.19753	3.06233e-05	-0.600015	0.00166
10171	RCL1	-1.99851	0.000167	-1.39263	0.00102048	-0.600226	0.00623
84162	KIAA1109	-1.09958	0.00508851	-1.40783	0.000635579	-0.600441	0.00833
7290	HIRA	-0.803408	0.011369	-1.04886	0.00143443	-0.600601	0.00271
3842	TNPO1	0.828332	0.0087542	-0.868715	0.0127605	-0.600877	0.00727
23212	RRS1	-0.593999	0.00538425	-0.53308	0.0065884	-0.601206	0.000948
23225	NUP210	0.684373	0.0181883	-0.696568	0.00366062	-0.601318	0.01
200845	KCTD6	-1.61941	0.00031	-1.13358	0.000336275	-0.60133	0.00164
4082	MARCKS	-1.04894	0.0433579	-1.44477	0.0054935	-0.601527	0.0237
55207	ARL8B	-0.715725	0.00259706	-1.03849	0.000122272	-0.602047	0.00167
79595	SAP130	-2.18529	0.000558	-2.78339	5.77956e-05	-0.602069	0.000641
6733	SRPK2	-1.83891	1.28e-05	-2.84822	1.64667e-06	-0.602248	0.0058
196441	ZFC3H1	-0.761369	0.00370936	-1.93077	4.44835e-06	-0.602373	0.00478
10949	HNRNPA0	-0.908952	0.000822	-1.12209	0.0001065	-0.605052	0.00105
10464	PIBF1	-2.27132	0.000748	-2.08367	0.000749121	-0.605448	0.00208
54928	IMPAD1	0.789723	0.0021053	-0.976884	0.000352207	-0.608211	0.000991
25888	ZNF473	-1.30481	0.0150688	1.27317	0.0116795	-0.609176	0.00238
546	ATRX	-0.937775	0.00500247	-1.13018	0.000943745	-0.610592	0.000821
54934	KANSL2	-1.57291	2.72e-05	0.456731	0.0336099	-0.610721	0.000513
9818	NUP58	1.90091	9.67e-06	1.60182	3.43876e-05	-0.61098	0.0121
473	RERE	-1.15045	0.00833136	-0.876899	0.0244481	-0.611719	0.000615
3184	HNRNPD	-2.28228	0.000666	-2.14111	2.22021e-06	-0.612955	0.00114
89970	RSPRY1	-1.1568	0.00213731	-1.39957	0.000351586	-0.614684	0.00988
57103	TIGAR	0.871195	0.00128842	0.591828	0.00867926	-0.615003	0.00577
164	AP1G1	-0.787033	0.001456	-1.01819	0.000143327	-0.615076	0.000737
10538	BATF	-0.482446	0.0359681	-0.779215	0.0015538	-0.615116	0.000702
10098	TSPAN5	-0.734406	0.00405131	-1.3097	5.01431e-05	-0.617042	0.00859
112724	RDH13	-1.18699	0.0232803	-1.35879	0.00755274	-0.618834	0.00551
57460	PPM1H	-2.5848	1.46e-05	-3.84036	6.68248e-07	-0.619504	0.00188
51362	CDC40	-0.606629	0.0404744	-0.569078	0.0395138	-0.619742	0.000516
220929	ZNF438	-1.04273	0.00186936	-1.56618	6.81974e-05	-0.620188	0.011
83734	ATG10	-1.75648	0.000256	-1.76358	0.000128494	-0.621131	0.000463
5618	PRLR	-1.06522	0.00271812	-1.90762	3.10849e-05	-0.621228	0.00168
27436	EML4	-0.785557	0.046935	-1.14358	7.47606e-05	-0.621327	0.00174
6745	SSR1	1.17945	0.000241	-0.979624	0.000174119	-0.621805	0.000845
27030	MLH3	-0.709657	0.0107374	0.703584	0.00861448	-0.623235	0.00439
29090	TIMM21	-0.467964	0.0317564	-0.515027	0.0135598	-0.623249	0.00179
988	CDC5L	0.615049	0.0434442	-0.508521	0.0196223	-0.62332	0.000833
88745	RRP36	0.988791	0.00816412	-0.462715	0.0246657	-0.623323	0.0011
26959	HBP1	0.97693	0.0051745	0.688302	0.0240854	-0.623629	0.0469
10611	PDLIM5	-1.05638	0.00611589	-3.28468	2.10301e-06	-0.62385	0.0372
83891	SNX25	-0.924841	0.00667301	-1.28648	0.000492862	-0.624442	0.00833
2059	EPS8	-1.001	0.000498	-1.57745	1.25412e-05	-0.624738	0.00126
26019	UPF2	-0.79849	0.00421151	-0.804317	0.00250305	-0.624753	0.00243
79902	NUP85	-0.604837	0.0225959	-3.17215	4.45112e-07	-0.62538	0.000963
3660	IRF2	-0.742355	0.0460066	-0.781736	0.0260625	-0.625511	0.00708
23248	RPRD2	-1.75972	0.00015	-1.49852	0.000228792	-0.626655	0.00488
64216	TFB2M	-0.590049	0.0213024	-0.590595	0.0145956	-0.62717	0.00314
79811	SLTM	-0.996187	0.00240149	-1.51037	8.37908e-05	-0.627876	0.000673
51366	UBR5	-1.30464	0.000154	-2.18411	1.93471e-06	-0.628031	0.00111
55669	MFN1	-1.13303	0.000357	-2.19228	5.83307e-06	-0.629023	0.0018
79840	NHEJ1	-0.941577	0.0220223	-1.09678	0.00639668	-0.629423	0.00726
79648	MCPH1	-2.49753	0.00115608	-1.8642	0.0044812	-0.630139	0.00122
5718	PSMD12	0.636196	0.0119642	-0.858515	0.00123026	-0.630177	0.000592
2187	FANCB	-1.33018	0.021231	-1.34028	0.0140303	-0.63019	0.00202
6907	TBL1X	-1.4088	8.14e-05	-1.40354	4.04356e-05	-0.63048	0.000557
23077	MYCBP2	-0.829904	0.0132764	-2.45633	6.85212e-06	-0.630556	0.00218
9014	TAF1B	-1.34581	3.85e-05	-1.11621	6.55042e-05	-0.631233	0.0118
9749	PHACTR2	-1.13009	0.00208105	-2.2715	1.09262e-05	-0.632788	0.00229
23635	SSBP2	-2.2298	3.62e-05	-3.49277	1.04939e-06	-0.632808	0.0334
55809	TRERF1	-2.06162	1.9e-05	-2.84286	1.24841e-06	-0.633787	0.00296
55833	UBAP2	-0.568	0.03045	-2.10274	4.6073e-06	-0.634171	0.00146
6566	SLC16A1	0.708252	0.00333964	1.48936	0.000235525	-0.635122	0.0232
5108	PCM1	-1.41762	0.000134	-0.922232	0.00244354	-0.635233	0.0204
55729	ATF7IP	-1.81241	0.000823	1.08085	0.000161806	-0.635364	0.00612
29068	ZBTB44	-1.18957	0.00232913	-1.30869	0.000740516	-0.63558	0.00477
25820	ARIH1	-1.59219	0.000296	-1.77109	7.55535e-05	-0.636152	0.00177
23580	CDC42EP4	-0.986376	0.000568	-0.898805	0.000588428	-0.636945	0.000577
23367	LARP1	0.761629	0.0197901	1.10382	0.00142289	-0.638232	0.0006
26065	LSM14A	-0.898428	0.00201057	-0.726079	0.00126954	-0.638365	0.000536
5884	RAD17	-1.6344	0.000159	-0.607617	0.0333306	-0.639732	0.00205
5195	PEX14	-1.47034	7.09e-05	-2.00852	6.273e-05	-0.63991	0.012
140609	NEK7	-1.04419	0.000836	-1.67569	1.85473e-05	-0.640933	0.00181
9860	LRIG2	-1.555	0.00327768	-1.94114	0.000457318	-0.641082	0.00886
145508	CEP128	-1.48584	0.000264	-3.06359	1.24841e-06	-0.641363	0.00222
55422	ZNF331	-0.960369	0.0272597	-1.33854	0.00275696	-0.641679	0.0014
83605	CCM2	-0.788447	0.0073685	-1.18907	0.000317053	-0.641967	0.00284
5073	PARN	-0.970547	0.000744	-1.92956	4.10692e-06	-0.642347	0.0377
1112	FOXN3	-2.68405	2.55e-05	-3.549	2.10301e-06	-0.642905	0.000741
2033	EP300	-0.972238	0.013791	-1.30389	0.00150975	-0.643857	0.00187
10533	ATG7	-0.50369	0.0343138	-1.7758	7.40865e-06	-0.644149	0.00129
9882	TBC1D4	-0.887056	0.00317717	-1.55699	4.23946e-05	-0.644557	0.00611
7337	UBE3A	-1.6978	1.77e-05	-1.22212	7.73227e-05	-0.644753	0.000842
1063	CENPF	-1.46011	2.05e-05	-1.24247	2.92806e-05	-0.645123	0.000535
26059	ERC2	-1.26163	0.0190882	-1.46588	0.0054777	-0.645424	0.00047
7957	EPM2A	-0.700167	0.00551841	-0.614062	0.0077348	-0.645509	0.00584
7756	ZNF207	-0.565221	0.0105789	-0.695937	0.0172339	-0.645712	0.000848
84930	MASTL	-1.20984	0.00122594	-1.00399	0.00243886	-0.646408	0.00249
5431	POLR2B	-0.700393	0.00282784	-1.21042	4.12826e-05	-0.646628	0.000604
23131	GPATCH8	-2.41967	7.3e-05	-1.41282	0.00140529	-0.647714	0.00586
51360	MBTPS2	-0.76331	0.00210981	-1.02321	0.00016923	-0.647864	0.0029
254427	PROSER2	-1.17255	0.000467	1.07714	0.000457659	-0.64838	0.00408
9318	COPS2	-0.52055	0.0182108	-0.991047	0.036991	-0.648632	0.000901
26018	LRIG1	-1.4096	0.00056	-1.88977	4.07771e-05	-0.649204	0.000807
10165	SLC25A13	-0.541394	0.0306806	-2.64195	8.96885e-07	-0.649619	0.000548
22894	DIS3	1.53117	0.00409038	0.778362	0.00167991	-0.652632	0.00542
6478	SIAH2	-1.5686	2.14e-05	-0.562988	0.00916541	-0.653289	0.00165
10973	ASCC3	-0.644571	0.0307489	-2.3002	5.83641e-06	-0.655425	0.00709
283149	BCL9L	-1.09639	0.000265	-0.566336	0.0102394	-0.655537	0.00302
9736	USP34	-1.07845	0.0011668	-2.0516	8.70424e-06	-0.65617	0.000737
55140	ELP3	-1.25414	0.0039585	-1.05478	0.00712497	-0.656311	0.00729
148423	C1orf52	-1.27723	0.000102	-0.579372	0.00906783	-0.656784	0.00163
9697	TRAM2	-0.995121	0.000487	-1.99911	2.60601e-06	-0.656915	0.000543
3099	HK2	-1.34782	0.000917	-1.77792	7.68254e-05	-0.657768	0.00227
6248	RSC1A1	0.530936	0.0268971	1.47763	2.49899e-05	-0.659219	0.00563
92140	MTDH	-0.469351	0.0387374	-1.27602	4.95919e-05	-0.659289	0.00184
159371	SLC35G1	0.846176	0.00195608	2.55659	8.69228e-07	-0.659968	0.0122
10128	LRPPRC	-1.50266	0.00598995	-1.62818	3.70886e-05	-0.660307	0.000716
7874	USP7	-0.558925	0.0140268	-1.37089	6.78598e-05	-0.66061	0.000369
3836	KPNA1	-0.868516	0.00792259	-1.48752	0.000142221	-0.660962	0.00148
339745	SPOPL	-1.6182	0.000353	-1.84449	7.71678e-05	-0.66299	0.000455
55614	KIF16B	-0.820509	0.00102915	-1.10103	0.000256759	-0.664478	0.011
317762	CCDC85C	-1.53133	0.000324	-1.25033	0.000703374	-0.665101	0.00193
55635	DEPDC1	-1.16424	7.93e-05	-2.22836	0.000579942	-0.665829	0.0106
1826	DSCAM	-1.81815	0.000317	-2.5845	5.90337e-05	-0.666286	0.00335
149420	PDIK1L	-1.06624	0.00776863	-1.16392	0.00290532	-0.66771	0.0014
10208	USPL1	-1.18939	0.000383	0.628367	0.0124888	-0.667802	0.0216
1662	DDX10	-2.94444	1.09e-06	-2.28806	1.47559e-06	-0.668016	0.00114
5822	PWP2	-0.835256	0.00104358	-1.22894	4.20911e-05	-0.668627	0.000468
55720	TSR1	0.943436	0.00623607	1.33523	0.000387469	-0.668637	0.000355
51523	CXXC5	-1.56508	5.74e-05	-2.59543	1.24281e-06	-0.669231	0.000416
79842	ZBTB3	-0.789043	0.0090442	-0.882133	0.0195568	-0.66935	0.032
9759	HDAC4	-1.10027	0.00163123	-1.03793	0.00142212	-0.669964	0.0386
10051	SMC4	-0.773808	0.00189234	-1.58055	8.97819e-06	-0.671049	0.000346
7555	CNBP	1.10226	0.00189439	2.22283	9.73344e-06	-0.67213	0.000357
11104	KATNA1	-1.13245	0.000778	0.558767	0.0308773	-0.672273	0.00175
51530	ZC3HC1	-0.841411	0.00338687	-0.726724	0.00522151	-0.672351	0.00044
55778	ZNF839	-1.23256	0.00344504	-1.45996	0.000691777	-0.672496	0.0019
55589	BMP2K	-0.68172	0.0280502	-1.43294	0.000179356	-0.673273	0.0268
5770	PTPN1	-0.774618	0.00149997	-0.432161	0.0281123	-0.673695	0.000583
7486	WRN	-1.08417	0.0243064	-1.50416	0.00245181	-0.673903	0.00622
84912	SLC35B4	0.979443	0.00907399	-0.696507	0.0155313	-0.673999	0.000857
9833	MELK	-0.989697	0.00074	-1.67654	1.13824e-05	-0.674936	0.00268
23392	ECPAS	-0.866088	0.0204445	-1.29852	0.00118569	-0.675913	0.00379
51143	DYNC1LI1	-1.09013	0.000714	-0.592106	0.0177367	-0.676244	0.00152
11073	TOPBP1	-1.42239	0.000239	-2.45074	3.39513e-06	-0.67687	0.000397
126231	ZNF573	-1.42823	0.0220223	-1.47716	0.0126769	-0.677693	0.00957
2530	FUT8	-1.54605	4.48e-05	-3.01241	4.02421e-07	-0.678293	0.00224
23397	NCAPH	-1.4523	0.00176394	-2.03785	0.000100953	-0.678612	0.00033
11275	KLHL2	-0.741886	0.00349926	-1.12846	0.000123735	-0.679456	0.0014
63892	THADA	-1.75232	0.000754	-2.56678	3.05981e-05	-0.679928	0.00118
10265	IRX5	-1.36556	6.18e-05	-1.59284	1.07789e-05	-0.681069	0.00178
5378	PMS1	2.23436	4.83e-06	4.35213	6.40615e-08	-0.681188	0.00158
114991	ZNF618	-1.20995	0.000695	-1.40404	0.000135668	-0.681352	0.00717
5411	PNN	1.18407	0.000144	-1.40385	0.000144175	-0.681728	0.000934
7750	ZMYM2	-1.78081	1.44e-05	-1.4819	2.35637e-05	-0.6822	0.00374
80311	KLHL15	-1.9452	0.000334	0.77733	0.0455937	-0.682942	0.00156
9262	STK17B	-1.31412	0.00012	-0.608396	0.00939777	-0.683778	0.00241
9169	SCAF11	-1.38169	0.000217	-1.41125	9.51933e-05	-0.684268	0.000322
55331	ACER3	0.850967	0.00565688	-1.17459	0.000426118	-0.685415	0.00177
114932	MRFAP1L1	-0.727806	0.00286505	-0.967455	0.000252386	-0.68576	0.0015
133522	PPARGC1B	-1.55312	0.00161637	-2.45651	4.10885e-05	-0.68709	0.00127
5927	KDM5A	-1.66607	0.000224	-1.9185	4.41104e-05	-0.68716	0.000896
80818	ZNF436	-0.575708	0.0284518	-0.689242	0.00737652	-0.687574	0.000984
27000	DNAJC2	-0.903836	0.000395	-0.599976	0.00331636	-0.688208	0.00139
80254	CEP63	-0.670893	0.0066759	1.2312	0.00362601	-0.68829	0.00083
197131	UBR1	-1.7366	0.000239	-2.56098	9.21213e-06	-0.688468	0.00192
163589	TDRD5	-1.79482	0.00113182	-2.17497	0.000172505	-0.688609	0.00594
6683	SPAST	-1.02865	0.00195186	-1.90923	1.73005e-05	-0.690469	0.000489
1654	DDX3X	-0.992	0.000332	-1.99583	3.1422e-06	-0.690944	0.000756
9117	SEC22C	-2.16634	0.000445	1.08209	0.00019846	-0.691143	0.0063
91862	MARVELD3	0.943971	0.00287591	0.79099	0.00531293	-0.691815	0.0425
9031	BAZ1B	-1.19779	0.000165	-0.634259	0.00579657	-0.691927	0.000345
118424	UBE2J2	-1.33434	5.42e-05	0.784475	0.0283476	-0.692395	0.00103
51720	UIMC1	-2.06021	2.87e-06	-1.37282	1.65266e-05	-0.693169	0.0011
51478	HSD17B7	0.689927	0.00688192	1.64303	1.32132e-05	-0.693999	0.00273
1386	ATF2	-1.21851	0.000413	-1.50197	0.000492384	-0.694784	0.00133
9748	SLK	-1.01804	0.0162417	-1.17604	0.00471757	-0.695355	0.000874
57645	POGK	-0.544219	0.0310648	1.45307	0.000393821	-0.695642	0.000413
10260	DENND4A	-0.898639	0.0368844	-0.900464	0.0261223	-0.696901	0.00202
23033	DOP1A	-2.02891	0.00078	-1.37614	0.00545445	-0.698129	0.00101
9870	AREL1	-0.707581	0.0177973	-0.788722	0.00649551	-0.699493	0.00037
51496	CTDSPL2	-1.40247	0.000103	-1.0964	0.000271871	-0.700057	0.00486
23678	SGK3	-1.85422	0.00137707	-2.28055	0.00019201	-0.700427	0.00113
5469	MED1	-1.21244	0.00146315	-1.15958	7.73227e-05	-0.700581	0.000892
55622	TTC27	-0.888398	0.0056635	-2.7216	2.12464e-06	-0.700906	0.00051
51341	ZBTB7A	-1.63127	7.85e-05	-1.44371	0.00119134	-0.70178	0.00675
54707	GPN2	-1.12467	0.00136197	-1.873	2.41915e-05	-0.702132	0.000515
5205	ATP8B1	-1.38185	0.00115805	-3.55452	2.3851e-06	-0.702703	0.000703
1390	CREM	-0.612559	0.0183805	1.06752	0.00290625	-0.703202	0.00427
154810	AMOTL1	-0.939202	0.0027479	-1.12246	0.000503072	-0.703232	0.00679
91120	ZNF682	-1.88213	0.000144	-1.32081	0.000836487	-0.703709	0.0254
10668	CGRRF1	-0.596169	0.0362996	0.872026	0.00296341	-0.705093	0.028
84937	ZNRF1	-1.23485	0.000141	-1.67319	9.373e-06	-0.706492	0.00322
147007	TMEM199	-0.726891	0.0183876	-0.871383	0.00435222	-0.706649	0.000915
23527	ACAP2	-2.18684	0.000198	-2.29799	5.61902e-06	-0.706805	0.00148
10200	MPHOSPH6	1.31615	0.0328161	1.62244	0.00740273	-0.706992	0.000589
26033	ATRNL1	-1.15666	0.00417545	-1.28304	0.00133352	-0.707785	0.00105
667	DST	-0.861851	0.00119683	-2.14894	1.60966e-06	-0.71003	0.000951
51058	ZNF691	-0.74276	0.0391444	-0.728303	0.0308548	-0.710059	0.00154
84725	PLEKHA8	-2.34827	1.13e-05	-2.50661	3.67111e-06	-0.710228	0.00356
23144	ZC3H3	-1.12569	0.0154789	-0.893216	0.0348082	-0.710676	0.0145
200765	TIGD1	-1.0294	0.00458775	-1.54263	0.000187938	-0.712548	0.00103
9218	VAPA	-0.582041	0.0254229	-1.37065	7.21886e-05	-0.712696	0.000421
57209	ZNF248	-1.30978	0.00698317	-1.42331	0.00266364	-0.712765	0.000451
1741	DLG3	-1.78155	0.000212	-1.40042	0.000573223	-0.715141	0.000349
81617	CAB39L	-0.841186	0.001899	-1.50683	2.12193e-05	-0.71552	0.0164
81627	TRMT1L	-0.598799	0.0183958	-1.36713	5.7826e-05	-0.716038	0.00174
219844	HYLS1	-2.1419	2.24e-05	-1.00658	0.00183054	-0.71667	0.000334
10847	SRCAP	0.617412	0.031263	0.625718	0.0206916	-0.717555	0.0106
56288	PARD3	-1.789	6.05e-05	-2.50325	4.96798e-06	-0.717591	0.0022
1739	DLG1	-2.45114	0.00014	-2.98613	1.68167e-06	-0.71791	0.000763
285315	C3orf33	-0.974197	0.00235248	-0.56086	0.0342056	-0.718012	0.00651
170394	PWWP2B	-1.21177	0.00054	-1.1068	0.000551538	-0.718663	0.000347
26130	GAPVD1	-1.30019	0.000212	-1.97296	6.81369e-06	-0.719539	0.000294
3764	KCNJ8	-1.33281	0.0156547	-1.08436	0.0103513	-0.720146	0.000705
6549	SLC9A2	-1.16345	0.0418003	-1.52727	0.00695454	-0.72057	0.00198
26267	FBXO10	-1.17836	0.000622	-1.08717	0.000593326	-0.720701	0.00458
9331	B4GALT6	-2.37836	0.00108968	-2.94502	0.000141862	-0.722216	0.00349
56180	MOSPD1	0.878813	0.00495301	1.40602	0.000131079	-0.722601	0.011
10420	TESK2	-1.22322	0.00636395	-1.50682	0.0010603	-0.722813	0.000274
22990	PCNX1	-1.41441	0.00129286	-1.71321	0.000199725	-0.724414	0.00104
6728	SRP19	-0.802612	0.0012264	-0.949176	0.000223008	-0.724604	0.00071
159195	USP54	-1.66019	0.00524185	-1.63337	0.00367243	-0.725337	0.0105
6426	SRSF1	-1.1246	0.000857	-2.39304	3.08509e-06	-0.726097	0.00664
122953	JDP2	-1.7295	0.00014	1.2463	0.000675115	-0.726848	0.00474
4155	MBP	-1.40643	0.00882048	-1.13596	0.019166	-0.727081	0.00242
340481	ZDHHC21	-0.545434	0.0487606	-2.09015	6.57828e-05	-0.727896	0.00579
9497	SLC4A7	-2.10832	5.12e-05	-3.05011	2.23496e-06	-0.72866	0.00607
55689	YEATS2	-0.989991	0.0192968	-0.785368	0.0422686	-0.729481	0.00834
57685	CACHD1	-1.31334	0.00338067	-1.49167	0.000902866	-0.729656	0.0102
23161	SNX13	-1.5827	0.000235	-1.86715	3.94616e-05	-0.729901	0.00108
7594	ZNF43	-1.09605	0.000814	-1.34899	0.000107338	-0.730424	0.00217
302	ANXA2	0.398513	0.0391873	-0.444799	0.0206327	-0.730626	0.000286
5983	RFC3	-0.760887	0.00245904	-1.90703	3.76672e-06	-0.731723	0.0005
55676	SLC30A6	-0.527496	0.0439193	-0.915905	0.00129564	-0.73181	0.00789
6009	RHEB	-0.922278	0.00373482	0.901946	0.000884651	-0.733961	0.00072
80829	ZFP91	-0.765837	0.00350492	-0.656955	0.00562098	-0.73441	0.000501
8504	PEX3	-0.553283	0.0311503	-2.14132	3.63807e-06	-0.735389	0.0212
79959	CEP76	-1.3397	0.000437	-1.09508	0.000949875	-0.735492	0.000626
57522	SRGAP1	-2.69973	1.6e-05	-3.2094	2.63658e-06	-0.736822	0.00758
5814	PURB	-0.918964	0.0144293	-0.783084	0.00469784	-0.737086	0.00179
10507	SEMA4D	-1.52907	0.00105116	-1.54822	0.000554295	-0.737596	0.00941
29028	ATAD2	-1.29424	0.000162	-1.19699	0.000140053	-0.739365	0.00023
3621	ING1	-1.52063	0.000205	-1.11542	0.000670991	-0.740439	0.00812
79813	EHMT1	-2.01118	0.000112	-3.01941	1.73435e-06	-0.740498	0.000573
9252	RPS6KA5	-2.51361	3.93e-06	-3.87709	1.82072e-07	-0.740911	0.00107
285268	ZNF621	0.522302	0.0468163	1.77859	1.47298e-05	-0.741103	0.026
10413	YAP1	-1.35389	0.00013	-1.57693	2.31561e-05	-0.741134	0.000432
23007	PLCH1	-2.83314	3.21e-05	-2.96159	1.17155e-05	-0.741472	0.0111
4149	MAX	-1.17764	0.000151	-0.753614	0.00523954	-0.741669	0.000253
23387	SIK3	-2.15385	0.000159	-2.44742	3.43095e-05	-0.743454	0.0119
8089	YEATS4	-2.12132	2.14e-05	-1.88713	2.27479e-05	-0.745558	0.00171
3093	UBE2K	-0.657548	0.013791	-1.2485	0.000139185	-0.746591	0.000496
65094	JMJD4	-1.11524	0.00422909	-1.17774	0.00186219	-0.746664	0.00346
92014	SLC25A51	1.2207	0.000222	1.79141	8.77266e-06	-0.746842	0.00437
7082	TJP1	-0.875081	0.00260213	-0.542104	0.0159149	-0.747146	0.000294
79577	CDC73	-0.885438	0.000977	-0.770927	0.00142289	-0.747265	0.000635
10512	SEMA3C	-0.646589	0.00431538	-1.35344	1.83003e-05	-0.747618	0.000397
51076	CUTC	-1.27348	0.000209	-0.62033	0.0115077	-0.747648	0.000335
117608	ZNF354B	0.426896	0.0392481	1.88708	2.12464e-06	-0.750059	0.00106
55247	NEIL3	-2.9237	1.52e-05	-1.57908	0.000485213	-0.753387	0.0145
9869	SETDB1	-1.73654	0.000196	-1.99504	3.89855e-05	-0.753435	0.000689
9474	ATG5	-1.09415	0.0007	-0.821152	0.00260584	-0.755176	0.00246
8394	PIP5K1A	-1.74979	1.17e-05	-0.503662	0.0337016	-0.755267	0.0149
79000	AUNIP	-0.916547	0.00368665	0.860895	0.00335018	-0.755546	0.00326
644096	SDHAF1	-0.807458	0.0196934	-0.766938	0.0178104	-0.758515	0.000702
8871	SYNJ2	-1.36287	0.0114589	-1.92731	0.000850518	-0.758525	0.00178
7026	NR2F2	-1.27234	0.000145	-2.30526	1.56546e-06	-0.759664	0.000924
84318	CCDC77	-0.580902	0.0126428	-0.959081	0.000330842	-0.760684	0.00362
5451	POU2F1	-2.75314	7.08e-05	-2.01743	0.000288296	-0.760868	0.0011
4591	TRIM37	-0.488017	0.0163379	-1.27846	0.000106235	-0.761422	0.00103
7746	ZSCAN9	-0.985052	0.0477405	-1.03413	0.0275497	-0.762401	0.00243
54462	CCSER2	-1.69816	2.58e-05	-1.0161	0.00118835	-0.76257	0.00158
9765	ZFYVE16	1.23287	0.0141117	-2.64476	6.73164e-05	-0.762717	0.0115
80005	DOCK5	-0.550464	0.0490525	-0.783501	0.00532422	-0.763475	0.000416
51621	KLF13	-1.14557	0.0178851	-1.12615	0.0134039	-0.76406	0.0155
10018	BCL2L11	-1.85251	3.61e-05	0.617669	0.0123266	-0.765412	0.0228
55846	ITFG2	0.744416	0.0427467	2.13132	4.02969e-05	-0.765631	0.0207
8819	SAP30	-1.97257	0.000165	-1.55819	0.000427214	-0.768033	0.00606
7181	NR2C1	-1.50493	0.0032164	-1.85118	0.000496123	-0.768473	0.00372
222255	ATXN7L1	-1.5844	0.000639	-1.79885	0.00014462	-0.768697	0.00155
2803	GOLGA4	-0.781433	0.00515113	-1.45127	5.01431e-05	-0.769098	0.000255
85453	TSPYL5	-0.556822	0.0118605	-0.510589	0.0129524	-0.769288	0.00038
153830	RNF145	-1.22285	0.00147616	-2.04241	2.57136e-05	-0.769781	0.00109
10492	SYNCRIP	-1.41805	0.00898504	-4.00457	5.83307e-06	-0.77009	0.000338
2976	GTF3C2	-0.74656	0.00442574	-1.55128	1.96856e-05	-0.771926	0.000247
64062	RBM26	-1.01808	0.00500291	-1.03383	0.00376486	-0.771962	0.000872
6760	SS18	-0.702013	0.00455764	-0.70912	0.00266699	-0.772431	0.000291
55761	TTC17	-1.45361	0.00933426	-2.17896	0.00044187	-0.772543	0.00162
9988	DMTF1	-0.56785	0.0254609	1.28896	9.20237e-05	-0.7733	0.0172
1763	DNA2	-1.15684	0.00184589	-2.09885	1.88843e-05	-0.773457	0.000606
7153	TOP2A	-1.1149	0.000471	-1.47862	3.70886e-05	-0.773836	0.000392
701	BUB1B	-1.91598	0.000172	-2.39901	1.92395e-05	-0.774079	0.000343
55131	RBM28	-0.89513	0.00430505	-0.631867	0.0203838	-0.775841	0.000422
25831	HECTD1	-1.0675	0.000269	-1.4423	1.83335e-05	-0.777836	0.000211
5893	RAD52	-0.841797	0.0454214	-0.68448	0.00729392	-0.779555	0.000272
10957	PNRC1	0.475783	0.0465812	0.572674	0.0131262	-0.779828	0.000509
219771	CCNY	-1.50341	0.00912048	-1.06121	0.00055504	-0.78025	0.00042
11191	PTENP1	-0.761776	0.0312989	-0.797471	0.0174712	-0.781136	0.000232
137695	TMEM68	-1.90242	0.000128	-1.76212	0.000105961	-0.781281	0.000934
56243	KIAA1217	-0.794474	0.0459068	-0.874523	0.0207757	-0.782729	0.000526
6120	RPE	-0.562672	0.0171204	-0.89667	0.000622539	-0.782738	0.00151
5529	PPP2R5E	-1.09369	0.000128	-1.3163	1.82338e-05	-0.78342	0.000307
128710	SLX4IP	-1.63158	2.31e-05	-0.705695	0.00318184	-0.783446	0.0385
153364	MBLAC2	-1.34805	0.00106152	-1.61045	0.000176808	-0.783681	0.00238
9710	KIAA0355	-1.99595	0.000172	-1.63366	0.000351536	-0.786362	0.00208
2107	ETF1	-0.68145	0.00278235	-0.588671	0.00428257	-0.788954	0.000183
55654	TMEM127	-0.573536	0.0216652	-1.56624	2.13125e-05	-0.788984	0.000152
8453	CUL2	-0.830195	0.00247396	-1.75138	9.50535e-06	-0.789006	0.00168
84976	DISP1	-0.726232	0.0116076	-0.914169	0.0231064	-0.789608	0.000729
286827	TRIM59	-1.94213	6.68e-05	-0.93717	0.00430552	-0.790027	0.0286
117178	SSX2IP	-1.46145	0.00202459	-2.29453	5.5464e-05	-0.790788	0.00063
23137	SMC5	-0.726232	0.0451407	-1.41724	0.000610884	-0.791292	0.000241
5007	OSBP	-1.10813	0.000257	0.984938	0.00113801	-0.791418	0.0055
54737	MPHOSPH8	-1.51787	0.000134	-2.05111	9.02005e-06	-0.791482	0.00103
54815	GATAD2A	-0.886211	0.00496228	-1.25157	0.00031458	-0.791701	0.000615
84181	CHD6	-2.52068	1.86e-05	-2.77156	4.86669e-06	-0.792114	0.00375
8864	PER2	-1.7373	0.000168	0.752381	0.0182745	-0.794263	0.0107
56943	ENY2	1.15713	0.00047	-3.55214	2.26296e-07	-0.79564	0.002
9100	USP10	-0.989578	0.000788	-1.3186	0.000747359	-0.796201	0.000268
4678	NASP	-1.61462	0.00589871	-2.79773	3.47411e-07	-0.796221	0.000852
51719	CAB39	-0.736265	0.0039953	-0.709649	0.00311922	-0.796533	0.00196
55182	RNF220	-1.02973	0.0260201	-0.89247	0.0370626	-0.797322	0.0325
11342	RNF13	-1.17234	0.000163	-1.40609	2.42196e-05	-0.798055	0.000813
54629	MINDY2	-0.948483	0.0421777	-1.39111	0.00359681	-0.799223	0.000413
29966	STRN3	-3.34453	2.6e-06	-2.33402	1.03322e-05	-0.800278	0.0149
23261	CAMTA1	0.784964	0.00443195	0.647949	0.00887143	-0.803064	0.000367
54915	YTHDF1	-0.50587	0.0302949	0.54588	0.0143133	-0.804087	0.00663
389677	RBM12B	-1.93456	1.26e-05	-1.16292	0.000186022	-0.804116	0.000218
23002	DAAM1	-1.18734	0.000302	-1.40065	5.21044e-05	-0.806918	0.000271
79598	CEP97	-1.47595	0.00146524	-1.65863	0.000386329	-0.807813	0.0018
56852	RAD18	-1.79041	0.00189439	-1.33692	0.00713349	-0.808706	0.000626
9202	ZMYM4	-1.57283	2.14e-05	-1.74	5.31541e-06	-0.808973	0.0112
6789	STK4	-0.791742	0.00258972	-0.495617	0.0244429	-0.809319	0.000194
387263	C6orf120	-0.848924	0.00319571	-0.987999	0.000719108	-0.810099	0.00821
64860	ARMCX5	-1.25408	0.000271	1.14625	0.000266064	-0.810908	0.00321
9053	MAP7	-1.26319	0.00190336	-1.64829	0.000182542	-0.81135	0.000164
10495	ENOX2	-1.66928	0.00134543	-2.09948	0.000160493	-0.811362	0.00016
6651	SON	-1.33703	0.000184	-1.51376	4.02656e-05	-0.811802	0.00044
9654	TTLL4	-1.1596	0.0301749	-1.25253	0.0141709	-0.813994	0.000221
4897	NRCAM	-1.18384	0.00133551	-1.78189	4.73602e-05	-0.815441	0.00019
9525	VPS4B	-0.636658	0.0335596	-1.02078	0.00148077	-0.818367	0.000482
80764	THAP7	-1.02223	0.00063	-0.664956	0.00574528	-0.818778	0.000245
7175	TPR	-0.858425	0.000778	-1.53524	5.4954e-05	-0.819033	0.000233
4773	NFATC2	-2.41248	2.6e-05	-2.47719	1.06661e-05	-0.82067	0.00468
[truncated: 1,156 more rows]

## Sheet: Common upregulated
		AF		ONC		RITA
Entrez ID	Gene Symbol	log2FC	FDR	log2FC	FDR	log2FC	FDR
467	ATF3	4.99338	2.77e-07	7.15576	2.20673e-08	5.84987	8.64e-08
1746	DLX2	5.21589	9.67e-08	3.37806	4.49896e-07	5.31152	3.06e-07
5366	PMAIP1	5.59135	1.2e-08	6.45797	4.97562e-09	4.80408	8.64e-08
1647	GADD45A	5.61006	1.2e-08	6.20914	6.47787e-09	4.71769	8.64e-08
1839	HBEGF	3.16361	2.35e-06	5.3484	6.40615e-08	4.4649	2.58e-07
22822	PHLDA1	2.22732	0.00031	2.68684	4.59125e-05	3.53568	2.77e-06
2114	ETS2	1.98747	0.00026	3.56392	2.81399e-06	3.50211	9.06e-06
5997	RGS2	3.31473	8.19e-06	1.84206	0.000191835	3.45445	1.57e-06
9518	GDF15	4.72048	2.56e-08	4.49688	2.45149e-08	3.44625	5.75e-07
23237	ARC	1.22147	0.0450586	1.36062	0.0190878	3.39063	8.02e-07
3725	JUN	2.14398	4.55e-06	2.81792	4.67616e-07	3.35231	1.13e-06
3976	LIF	2.25636	0.000115	1.18605	0.00422874	3.08921	1.38e-05
6167	RPL37	2.31644	1.06e-05	2.01173	1.30448e-05	3.0757	2.51e-06
23764	MAFF	1.03243	0.00635428	2.87929	4.30935e-06	2.93548	1.13e-05
3133	HLA-E	2.95541	9.27e-07	3.98136	7.11812e-08	2.77	4.87e-06
29950	SERTAD1	3.13068	1.46e-06	2.54053	2.02327e-06	2.70207	2.01e-06
131583	FAM43A	1.98458	0.000444	2.56854	4.11246e-05	2.69226	1.96e-05
9935	MAFB	3.545	3.59e-06	3.23029	2.81399e-06	2.6693	2.71e-06
8614	STC2	1.38637	0.000134	4.63789	6.40615e-08	2.66553	1.52e-06
4808	NHLH2	1.70272	0.000732	0.854203	0.0271188	2.63138	0.000123
64061	TSPYL2	1.17735	0.00797063	1.19247	0.00477566	2.60541	9.69e-06
1543	CYP1A1	6.41283	1.2e-08	1.68945	2.13131e-05	2.59554	2.88e-06
6624	FSCN1	1.04218	0.00195683	1.41599	0.000142159	2.54385	8.74e-06
10204	NUTF2	2.23292	0.000126	3.28939	4.80752e-06	2.54053	1.7e-06
51278	IER5	1.92492	1.43e-05	1.92934	6.85212e-06	2.52579	4.8e-06
10614	HEXIM1	1.60476	0.000154	1.79811	3.63145e-05	2.49966	5.26e-06
84981	MIR22HG	2.7137	5.67e-05	1.44376	0.00198172	2.49359	1.85e-06
6535	SLC6A8	1.41709	0.000136	3.64682	2.42031e-07	2.47719	8.74e-06
25764	HYPK	0.924387	0.00214071	1.37145	8.56821e-05	2.42688	5.11e-05
7779	SLC30A1	1.66931	1.19e-05	1.92951	2.31244e-06	2.39521	2.34e-06
27042	UTP25	2.20094	6.67e-05	1.84215	0.000106359	2.36976	2.03e-05
80328	ULBP2	1.92967	0.000209	1.20814	0.00253591	2.34198	1.2e-05
6157	RPL27A	1.398	0.0134758	0.858486	0.00172188	2.29786	6.07e-05
90639	COX19	1.60795	0.000738	3.38661	2.79101e-06	2.29617	3.1e-06
1026	CDKN1A	3.67443	2.77e-07	2.82008	4.7542e-07	2.28712	3.92e-06
6303	SAT1	3.08582	1.16e-06	3.9487	1.16105e-07	2.28424	6.27e-06
26156	RSL1D1	2.62082	3.59e-06	4.65311	2.42031e-07	2.18052	5.22e-06
5912	RAP2B	0.844681	0.00140289	0.933016	0.000415251	2.16206	2.21e-05
90990	KIFC2	1.33345	0.0152142	1.70577	0.00230666	2.15782	5.71e-05
1545	CYP1B1	2.75552	5.68e-07	0.954333	0.000310473	2.14055	6.7e-06
9314	KLF4	3.09932	3.31e-06	2.08328	1.8233e-05	2.13942	2.34e-06
79957	PAQR6	0.799003	0.0325281	0.683338	0.0483163	2.11759	5.72e-05
219743	TYSND1	1.21087	0.0426194	1.35639	0.0173525	2.106	1.08e-05
54541	DDIT4	1.98539	7.5e-06	2.26215	1.56546e-06	2.06533	7.21e-05
57035	RSRP1	2.24172	1.25e-05	2.19838	6.93353e-06	2.05148	4.78e-06
90871	DMAC1	1.5929	0.00452872	2.23675	0.000291923	2.03532	1.01e-05
9939	RBM8A	2.32126	2.48e-06	1.21386	6.45348e-05	2.03519	1.97e-05
26007	TKFC	0.815654	0.0132858	0.879122	0.00572891	2.01373	1.82e-05
7832	BTG2	3.14825	1.66e-06	2.34125	4.07206e-06	2.00462	7.66e-06
55502	HES6	1.11332	0.00576882	2.85091	6.67252e-06	2.00371	3.96e-05
8349	HIST2H2BE	1.08367	0.00295492	1.33741	0.000438208	2.00176	1.11e-05
7280	TUBB2A	2.30956	2.52e-06	1.91432	3.26578e-06	2.00134	2.06e-05
27289	RND1	2.90665	8.88e-06	1.12138	0.00248564	1.98887	1.01e-05
122525	C14orf28	0.881503	0.0147276	1.65641	0.000162924	1.98735	5.13e-05
1745	DLX1	2.73065	5.23e-06	1.13852	0.000821918	1.95673	3.27e-06
10628	TXNIP	1.25162	4.84e-05	1.68365	3.39114e-06	1.92519	6.27e-06
8061	FOSL1	2.67972	0.00013	1.47886	0.00355961	1.91866	8.28e-06
1265	CNN2	0.790866	0.0111598	0.683128	0.0168351	1.91557	4.02e-06
116842	LEAP2	1.656	0.000242	0.903329	0.00688857	1.91202	5.02e-05
51318	MRPL35	2.19169	0.000206	1.74285	0.000512357	1.90128	8.74e-06
64412	GZF1	1.02283	0.0389597	1.79968	4.30935e-06	1.86805	1.05e-05
4616	GADD45B	2.02475	8.29e-06	2.4096	1.81715e-06	1.82529	7.75e-06
27113	BBC3	0.799886	0.00511959	1.55176	3.68816e-05	1.80267	6.66e-06
57184	FAM219B	3.24688	3.53e-06	4.92036	1.82072e-07	1.78569	6.44e-05
6234	RPS28	0.74883	0.0251245	0.797925	0.0124441	1.77402	6.21e-05
10602	CDC42EP3	1.35999	0.000713	2.31846	1.05523e-05	1.7499	0.000228
2296	FOXC1	0.766501	0.0153669	1.31056	0.000332865	1.7209	3.84e-05
5017	OVOL1	1.15343	0.000761	2.01505	9.65087e-06	1.71871	5.53e-06
54626	HES2	3.10438	1.74e-06	0.686568	0.0120489	1.67644	0.0002
57561	ARRDC3	1.97512	3.81e-05	3.84766	3.59671e-07	1.67314	2.38e-05
8744	TNFSF9	2.04583	0.000105	0.858663	0.014392	1.66713	1.01e-05
166336	PRICKLE2	2.2533	6.56e-06	1.92486	8.38809e-06	1.65431	7.47e-05
7089	TLE2	1.12359	0.00124081	1.82039	2.64053e-05	1.64496	1.17e-05
23558	WBP2	1.10862	0.0066769	2.39271	2.42196e-05	1.63985	5.22e-05
4487	MSX1	2.8851	1.03e-05	2.15168	3.47828e-05	1.6223	1.33e-05
6452	SH3BP2	1.19834	0.00284623	1.89232	7.67499e-05	1.6153	5.64e-05
122704	MRPL52	0.513392	0.0246488	1.35613	0.000391863	1.59949	0.000521
1958	EGR1	1.60161	0.000284	5.47404	9.15889e-08	1.59446	1.09e-05
91947	ARRDC4	1.27111	0.000468	2.39353	3.73969e-06	1.58576	7.15e-06
26471	NUPR1	2.07387	0.000844	6.97861	2.68914e-07	1.58147	2.02e-05
84707	BEX2	1.0638	0.000401	3.94023	7.76658e-08	1.57386	2.56e-05
24146	CLDN15	1.40249	0.00817902	1.90867	0.000729841	1.56315	0.00038
80700	UBXN6	0.985942	0.000347	1.70909	4.71299e-06	1.55993	5.82e-05
92703	TMEM183A	2.00373	2.01e-05	2.77404	1.29655e-06	1.5417	1.11e-05
6635	SNRPE	2.09703	0.000227	1.54778	0.00095325	1.53584	1.36e-05
26468	LHX6	1.11006	0.0186676	1.12717	0.0117431	1.53177	0.000207
6431	SRSF6	1.54497	2.03e-05	0.776548	0.00470244	1.52437	8.07e-06
29948	OSGIN1	2.70612	8.05e-06	0.94283	0.00421223	1.52025	1.87e-05
6228	RPS23	1.98612	6.55e-06	1.35965	3.58689e-05	1.5172	4.85e-05
51148	CERCAM	0.507558	0.0380148	0.533171	0.0212622	1.51099	0.000104
166	AES	0.619042	0.0236669	0.902962	0.00172148	1.51069	2.62e-05
1843	DUSP1	0.990534	0.00126795	1.8263	1.14676e-05	1.50936	2.84e-05
255783	INAFM1	1.74377	1.86e-05	2.89891	4.62167e-07	1.50082	1.47e-05
80235	PIGZ	1.84154	0.0196503	2.01956	0.00800308	1.49802	8.8e-05
79797	ZNF408	0.997786	0.00558152	2.43512	8.92318e-06	1.49754	7.88e-06
58473	PLEKHB1	0.825811	0.0163591	0.869981	0.00825604	1.48679	5.64e-05
53635	PTOV1	1.15381	0.000292	1.34637	5.41935e-05	1.47913	1.86e-05
83667	SESN2	1.3573	0.000248	2.30567	3.84429e-06	1.47843	3.52e-05
56271	BEX4	0.725736	0.0291377	2.51563	6.61361e-06	1.46988	2.45e-05
51646	YPEL5	1.52862	0.000171	1.94987	1.70395e-05	1.46644	2.43e-05
79041	TMEM38A	0.893663	0.0245398	1.05578	0.00670145	1.4653	1.24e-05
79877	DCAKD	1.00392	0.000682	1.6882	1.10053e-05	1.46522	1.5e-05
4122	MAN2A2	1.22736	0.00466439	1.25522	7.47606e-05	1.4532	0.00238
144811	LACC1	3.00277	1.87e-05	0.994293	0.012818	1.44878	8.81e-06
1508	CTSB	0.886823	0.000926	1.119	0.0025321	1.44558	1.65e-05
90861	JPT2	1.74306	8.33e-05	2.53303	3.52002e-06	1.44068	0.000116
80344	DCAF11	0.550689	0.0159435	0.597071	0.00677213	1.4389	3.09e-05
56941	HMCES	1.66352	2.1e-05	0.888432	0.000730818	1.43238	2.56e-05
582	BBS1	0.821494	0.0216332	2.30396	1.79408e-05	1.42977	1.38e-05
55793	MINDY1	0.777133	0.0342058	1.45077	0.000547408	1.4168	6.9e-05
5792	PTPRF	1.55887	0.000209	1.25363	0.000479785	1.411	0.000421
6165	RPL35A	1.39758	0.000253	1.9853	1.25412e-05	1.40732	3.02e-05
26469	PTPN18	0.781419	0.0158885	0.567805	0.0353773	1.40371	2.62e-05
25792	CIZ1	1.04552	0.000284	1.33614	2.82425e-05	1.39338	1.71e-05
51157	ZNF580	0.768569	0.0193925	2.04985	2.16214e-05	1.3924	2.01e-05
79680	RTL10	2.18008	8.33e-05	1.94677	8.68503e-05	1.3889	6.07e-05
1107	CHD3	1.07807	0.000224	1.73903	4.74239e-06	1.38248	1.14e-05
1381	CRABP1	0.891566	0.0222485	1.03619	0.00656014	1.38121	0.00019
79154	DHRS11	0.826302	0.014353	0.725976	0.0195711	1.37534	5.68e-05
333	APLP1	0.815085	0.00494567	0.800071	0.00351281	1.36985	0.000226
9616	RNF7	0.439344	0.0316473	1.26101	2.54987e-05	1.36656	0.000118
84826	SFT2D3	0.995092	0.000608	1.81219	5.81344e-06	1.35474	1.19e-05
2878	GPX3	1.48143	9.5e-05	1.0251	0.000581571	1.3482	2.7e-05
57763	ANKRA2	1.54842	0.000141	1.52662	7.85161e-05	1.34389	6.4e-05
253980	KCTD13	1.52728	0.00111215	3.12235	5.07795e-06	1.34262	0.000307
146540	ZNF785	2.31486	5.23e-06	2.82749	7.6858e-07	1.33605	0.000176
10284	SAP18	1.41926	4.32e-05	1.85462	3.69907e-06	1.3354	1.78e-05
8751	ADAM15	0.983896	0.000818	0.816077	0.00162112	1.32248	3.98e-05
1263	PLK3	1.79278	0.00181084	2.04831	0.000434885	1.31988	0.00035
3398	ID2	0.959278	0.000508	1.08497	0.000117037	1.31772	3.51e-05
7593	MZF1	1.65413	0.000444	1.80427	0.000130692	1.31743	0.000881
118812	MORN4	0.820065	0.0120565	2.34797	7.6283e-06	1.30852	1.84e-05
60509	AGBL5	1.18792	0.00259532	1.27911	0.000962244	1.30721	2.85e-05
79145	CHCHD7	1.74895	0.000145	2.01386	2.84092e-05	1.30697	0.000109
55268	ECHDC2	0.775208	0.0140954	1.68542	5.73976e-05	1.30651	2.53e-05
118430	MUCL1	1.16443	0.0111395	1.03367	0.0144976	1.30025	2.04e-05
116151	FAM210B	2.30921	7.62e-06	2.22885	4.42484e-06	1.29963	2.06e-05
60681	FKBP10	0.820299	0.0113309	0.709342	0.0169846	1.29954	3.52e-05
22932	POMZP3	1.02915	0.00525486	1.98879	3.88784e-05	1.29821	3.02e-05
5993	RFX5	0.884712	0.00184095	0.705649	0.00466288	1.29787	3.52e-05
84153	RNASEH2C	1.37649	0.000195	1.37998	1.49709e-05	1.29734	0.000494
128439	SNHG11	0.697332	0.0389437	2.13459	2.23886e-05	1.28978	6.68e-05
1639	DCTN1	1.10534	0.00960541	1.60108	0.000218969	1.2871	0.000153
54855	TENT5C	2.02662	7.93e-05	1.31181	0.000763247	1.28658	0.000222
113235	SLC46A1	1.38863	0.00027	1.5736	6.07813e-05	1.281	6.95e-05
2353	FOS	2.31258	2.22e-06	5.79807	6.47787e-09	1.28038	4.25e-05
1857	DVL3	0.85923	0.00218725	1.63393	1.65818e-05	1.27862	2.52e-05
10608	MXD4	0.954443	0.00226665	1.67231	2.95125e-05	1.27774	4.9e-05
4000	LMNA	0.931532	0.00112373	1.21878	0.000425372	1.26179	4.25e-05
10127	ZNF263	1.23331	0.00026	2.9156	6.16302e-07	1.26145	5.15e-05
63926	ANKEF1	1.35145	0.000118	0.706983	0.0044715	1.26102	0.00176
10554	AGPAT1	1.0634	0.000301	1.87281	3.72413e-06	1.26073	6.74e-05
9246	UBE2L6	0.705796	0.0119642	0.702365	0.00823333	1.25915	0.000173
51593	SRRT	0.585912	0.00622064	0.424382	0.0244336	1.25739	0.000102
9540	TP53I3	2.25551	2.48e-06	0.864513	0.000559453	1.25715	0.000426
59	ACTA2	3.12028	0.000117	1.6981	0.00347069	1.25644	0.000429
54205	CYCS	1.55945	0.000277	1.52183	0.0125235	1.25083	0.00318
4641	MYO1C	0.760163	0.00610293	1.00693	0.000617029	1.24955	1.99e-05
92305	TMEM129	1.24379	0.000945	2.33023	7.6864e-06	1.22903	9.98e-05
84264	HAGHL	1.7349	0.000101	2.46774	4.76365e-06	1.22887	7.19e-05
11282	MGAT4B	1.1256	0.000138	1.34896	2.04787e-05	1.2222	4.35e-05
341	APOC1	1.04517	0.0117158	1.93802	6.51906e-06	1.22186	2.58e-05
142678	MIB2	2.71688	1.41e-06	3.04089	3.47411e-07	1.22096	7.94e-05
1797	DXO	1.03297	0.00567876	1.96498	9.29113e-06	1.21988	3.51e-05
10421	CD2BP2	1.1678	0.000572	1.40471	8.68503e-05	1.21152	0.000136
5036	PA2G4	2.01229	1.59e-05	1.58524	3.78638e-05	1.20946	0.000164
2907	GRINA	1.2078	0.00381071	1.32578	0.00129328	1.20868	2.01e-05
54884	RETSAT	1.79807	1.5e-05	2.35563	1.38432e-06	1.2052	0.000124
4968	OGG1	0.657628	0.0489078	1.38993	0.000400824	1.2037	0.0001
90864	SPSB3	0.627521	0.0121126	1.26039	8.11384e-05	1.20221	5.39e-05
326625	MMAB	1.11783	0.000823	1.62963	1.0238e-05	1.20131	4.64e-05
6430	SRSF5	0.535711	0.0189027	0.726115	0.00207045	1.20042	0.000103
51171	HSD17B14	1.09852	0.0224181	1.43109	0.000514686	1.19522	5.5e-05
3338	DNAJC4	0.868748	0.0193581	2.14203	3.6473e-05	1.19284	4.31e-05
9636	ISG15	1.07273	0.00251863	1.46855	0.00017723	1.19117	0.000208
79798	ARMC5	0.803545	0.0167674	1.01342	0.00283113	1.191	6.13e-05
8878	SQSTM1	0.531235	0.0107281	1.38073	0.00285103	1.18971	0.000161
5763	PTMS	1.4639	0.00197201	1.43387	0.00136081	1.18959	0.000441
5564	PRKAB1	1.47238	8.87e-05	2.1988	3.12176e-06	1.18801	2.22e-05
90313	TP53I13	0.657682	0.0443242	1.10085	0.00166881	1.18563	0.000289
64432	MRPS25	0.557994	0.0268327	1.64907	1.69037e-05	1.18331	5.47e-05
10406	WFDC2	0.770273	0.0447269	0.743888	0.038355	1.18265	0.00019
1845	DUSP3	0.889929	0.000757	1.34638	2.46341e-05	1.18189	7.55e-05
5268	SERPINB5	6.02645	1.2e-08	1.41924	4.36448e-05	1.18148	0.00398
11212	PLPBP	1.39849	4.31e-05	1.94957	2.45663e-06	1.18084	3.96e-05
22933	SIRT2	1.40978	0.00167087	0.963466	0.0106038	1.18021	0.000561
115908	CTHRC1	1.88031	0.000319	3.27345	4.2423e-06	1.17995	3.34e-05
84890	ADO	0.960554	0.00268981	1.68629	3.51426e-05	1.17904	5.24e-05
81855	SFXN3	0.802557	0.0265241	0.907422	0.00946973	1.17627	7.49e-05
58526	MID1IP1	0.69322	0.0300931	1.74289	5.85918e-05	1.17534	0.000179
26515	TIMM10B	0.883788	0.00175795	2.52567	1.04939e-06	1.17471	2.41e-05
155066	ATP6V0E2	0.971578	0.00146637	0.800694	0.00302631	1.17264	5.9e-05
10295	BCKDK	0.832557	0.0198305	1.13151	0.00216296	1.17147	2.94e-05
10493	VAT1	1.18859	0.000978	1.67438	5.32824e-05	1.16761	2.65e-05
126823	KLHDC9	0.618407	0.049627	1.65781	7.93323e-05	1.1646	0.000347
6160	RPL31	1.02278	0.00215485	1.0829	0.000885902	1.16443	2.32e-05
8519	IFITM1	1.0695	0.00172439	0.574918	0.0375703	1.16173	0.000141
126119	JOSD2	0.783714	0.0102982	0.952095	0.00203324	1.15838	8.34e-05
4796	TONSL	0.620885	0.0426348	1.42998	0.000176784	1.15727	0.00134
58476	TP53INP2	0.667493	0.023499	1.26896	0.000281656	1.15683	7.77e-05
4488	MSX2	1.14666	0.00101513	1.10693	0.000739057	1.15424	8.52e-05
23061	TBC1D9B	0.558039	0.0219053	0.55841	0.0113949	1.1487	0.000103
2232	FDXR	2.65048	9.47e-06	2.74555	3.69907e-06	1.14626	7.67e-05
37	ACADVL	0.865484	0.0094564	1.03741	0.00201237	1.14624	0.000743
27089	UQCRQ	0.439049	0.0378864	0.666132	0.0024921	1.14622	3.64e-05
81631	MAP1LC3B	1.20508	0.000142	3.43056	1.36506e-07	1.14618	5.67e-05
9556	ATP5MPL	0.738078	0.00254169	0.688499	0.00240615	1.14576	0.000113
6619	SNAPC3	0.897832	0.00318563	1.79289	1.79867e-05	1.14532	3.42e-05
4668	NAGA	0.841144	0.0262435	0.693233	0.0468495	1.14352	0.000187
1267	CNP	0.596846	0.021275	0.587435	0.0159723	1.13867	8.3e-05
7392	USF2	0.778859	0.00823013	1.46678	7.83415e-05	1.13236	4.97e-05
79035	NABP2	0.94858	0.00512257	1.10283	0.00123154	1.13225	2.57e-05
6919	TCEA2	0.803752	0.00965137	0.829682	0.0052488	1.12978	7.36e-05
200081	TXLNA	1.19693	0.0084826	2.19085	9.77759e-05	1.12895	0.00024
6722	SRF	0.468546	0.0485904	1.62168	1.39838e-05	1.12893	0.000154
10482	NXF1	0.85951	0.00437527	2.29134	3.8539e-06	1.12517	0.000105
92840	REEP6	0.710904	0.0208506	0.78208	0.00840564	1.11771	5.82e-05
94101	ORMDL1	1.05121	0.00809942	0.941089	0.000184392	1.1147	0.00601
23354	HAUS5	0.613767	0.0418007	0.659182	0.0314403	1.11427	0.000198
6659	SOX4	0.936608	0.000632	1.12303	9.79629e-05	1.11395	4.45e-05
23109	DDN	0.641795	0.0174512	1.19493	0.000216086	1.11374	0.00407
4501	MT1X	1.38061	0.00021	1.87823	8.58626e-06	1.1115	0.0003
10525	HYOU1	0.471006	0.0291749	0.763488	0.00113801	1.11035	0.000117
2872	MKNK2	0.838844	0.0254615	1.12353	0.00325108	1.10743	5.85e-05
1475	CSTA	0.817712	0.00191964	1.8716	4.35324e-06	1.10486	0.00035
26012	NSMF	1.11157	0.00271509	1.2883	0.0006126	1.10081	0.000316
64943	NT5DC2	0.977433	0.00169162	0.692445	0.00872997	1.09915	9.16e-05
6382	SDC1	1.42223	4.93e-05	0.732249	0.00213132	1.0989	0.000835
124446	TMEM219	1.11761	0.00111944	1.43271	0.000115069	1.09863	2.96e-05
53836	GPR87	2.8574	3.85e-05	0.896945	0.0295752	1.09619	0.0244
2644	GCHFR	0.804718	0.0122322	0.709668	0.0165061	1.09594	0.000222
26152	ZNF337	1.13777	0.00669785	1.05577	0.006753	1.09529	0.000499
7157	TP53	0.776669	0.00364113	1.35728	5.10102e-05	1.09301	6.17e-05
286006	LSMEM1	1.28191	0.0270728	2.08479	0.00100379	1.09139	0.0125
283899	INO80E	0.941003	0.00117066	1.61561	1.70538e-05	1.09115	0.000291
347744	C6orf52	1.21517	0.000778	1.09315	0.000894643	1.08905	0.000213
3665	IRF7	0.907106	0.0238869	1.89268	0.000150305	1.08899	0.000128
25870	SUMF2	1.03429	0.000532	1.8074	6.7428e-06	1.08795	2.84e-05
9140	ATG12	1.1482	0.000436	1.70683	1.6207e-05	1.08709	8.3e-05
23621	BACE1	0.992765	0.00361015	0.683294	0.0212957	1.08592	0.000152
93099	DMKN	1.32677	0.000135	1.94775	5.19306e-06	1.084	5.59e-05
84836	ABHD14B	1.11333	0.00164173	2.03668	1.60474e-05	1.08295	0.000872
5106	PCK2	0.980012	0.00218904	4.84419	7.11812e-08	1.0811	0.000378
51566	ARMCX3	1.70291	0.000243	0.999349	0.00446692	1.07852	0.00167
150696	PROM2	0.44373	0.0471737	0.619082	0.0229217	1.07699	4.72e-05
84232	MAF1	0.701157	0.021232	1.3192	0.00026276	1.07192	0.00011
79650	USB1	0.451377	0.0422654	0.893871	0.000499587	1.0691	0.00013
339456	TMEM52	0.595456	0.0481343	0.80245	0.00720503	1.06806	7.79e-05
94241	TP53INP1	3.47018	8.72e-06	1.53774	0.000992427	1.06182	0.000107
6890	TAP1	2.46194	1.4e-05	1.64291	0.00010032	1.0587	0.000134
285550	FAM200B	1.50384	0.000138	1.39719	0.000113641	1.05866	8.3e-05
10844	TUBGCP2	0.578698	0.010544	0.460411	0.0243865	1.05615	7.78e-05
23062	GGA2	1.74435	0.000179	1.52182	0.000232883	1.05555	0.000146
6525	SMTN	0.703888	0.012797	0.822717	0.00250643	1.0546	8.24e-05
93058	COQ10A	1.79211	6.42e-05	2.00179	1.49943e-05	1.05395	7.2e-05
80347	COASY	0.895079	0.00175281	1.55462	2.39103e-05	1.05342	5.82e-05
347862	GATD1	1.2861	0.000129	2.37493	1.24841e-06	1.05245	0.000147
2319	FLOT2	0.96611	0.0024542	0.594222	0.0256345	1.05218	0.000223
80195	TMEM254	1.01429	0.00111314	1.04349	0.000530942	1.05138	0.000103
1030	CDKN2B	2.41385	5.23e-06	5.05836	5.38757e-08	1.05114	0.000528
90522	YIF1B	0.98257	0.0247159	0.846272	0.0216127	1.04933	6.84e-05
7317	UBA1	0.869011	0.00422135	0.800938	0.00439819	1.04829	0.0003
56906	THAP10	1.74793	9.76e-06	2.11947	1.44979e-06	1.04679	6.06e-05
51599	LSR	0.93787	0.00111162	1.73274	9.90599e-06	1.04668	5.54e-05
8682	PEA15	1.60398	9.76e-06	2.15213	8.37855e-07	1.04368	0.000153
375287	RBM43	1.35797	0.0049312	1.09782	0.0111173	1.04282	0.000175
119504	ANAPC16	1.32173	0.000356	2.32552	4.4242e-06	1.04134	0.000509
64776	C11orf1	1.43428	0.00012	2.07534	1.14205e-06	1.038	0.000198
53827	FXYD5	1.08833	0.0135077	1.09547	0.00872012	1.03738	6.71e-05
81858	SHARPIN	0.595273	0.0402868	1.15144	0.000546298	1.03682	0.000321
581	BAX	1.15447	0.000422	0.599937	0.0148586	1.03675	0.000175
230	ALDOC	1.50504	4.47e-05	2.32894	1.36031e-06	1.03651	8.03e-05
84296	GINS4	1.63984	0.000327	0.646742	0.047629	1.03538	0.000101
64689	GORASP1	1.04074	0.00699196	1.57758	0.000287461	1.03484	0.000175
57106	NAT14	1.31382	0.000134	1.74674	9.94559e-06	1.03403	5.4e-05
63826	SRR	1.13658	0.000963	1.34818	8.69255e-05	1.03189	6.67e-05
8733	GPAA1	0.79998	0.00329935	0.797655	0.00200004	1.03038	0.000206
400961	PAIP2B	1.28381	0.00948048	2.16467	0.000198275	1.03008	0.000201
54862	CC2D1A	0.59066	0.0375691	1.23095	0.00171766	1.02994	0.000309
6715	SRD5A1	0.961724	0.000532	0.643028	0.00419444	1.02651	0.000152
29952	DPP7	1.02029	0.000553	1.58315	3.59521e-05	1.02618	0.000368
27290	SPINK4	1.23106	0.000799	0.621687	0.0282102	1.02562	0.000191
23623	RUSC1	0.648402	0.00907958	0.744934	0.00251426	1.02467	0.000124
400073	C12orf76	1.85985	0.000116	3.41642	1.16259e-06	1.02418	0.00275
2280	FKBP1A	1.24028	7.85e-05	0.7189	0.00133004	1.02252	4.21e-05
97	ACYP1	1.45018	0.000211	1.03539	0.0010928	1.02086	0.00029
5723	PSPH	0.580993	0.0136544	2.27257	1.25836e-06	1.02005	8.35e-05
3659	IRF1	1.52554	0.00058	0.603797	0.0124661	1.01851	0.000304
84065	TMEM222	0.929254	0.000699	2.17233	1.43673e-06	1.01845	5.3e-05
201229	LYRM9	1.21526	0.00145516	2.63318	4.63837e-06	1.01723	4.31e-05
79716	NPEPL1	0.780336	0.0063252	1.13465	0.000339055	1.01202	0.00022
115817	DHRS1	1.76407	0.000123	1.1788	0.000967664	1.012	0.000148
80270	HSD3B7	0.567248	0.0406885	0.712437	0.00869181	1.01199	7.73e-05
414	ARSD	1.05449	0.00658499	2.44557	1.34242e-05	1.01074	9.25e-05
23381	SMG5	0.757893	0.00887055	2.19611	4.86933e-06	1.00578	0.000476
83638	C11orf68	1.61398	0.000345	1.69046	0.000133781	1.0053	0.000318
57402	S100A14	0.709351	0.00654319	0.775682	0.00238832	1.00448	6.19e-05
23646	PLD3	0.966338	0.0221942	1.31001	0.00252477	1.00243	0.00885
2539	G6PD	0.874288	0.00160477	0.769324	0.00218614	1.00141	7.05e-05
199990	FAAP20	0.78936	0.0101863	1.5062	9.20359e-05	1.00137	9.65e-05
27346	TMEM97	0.812056	0.000814	1.96301	1.36031e-06	1.00041	5.39e-05
10947	AP3M2	1.61962	0.000118	2.30695	5.43234e-06	0.998481	0.000299
9088	PKMYT1	1.36242	0.000179	1.02611	0.00064564	0.998416	7.38e-05
56654	NPDC1	1.05586	0.000178	1.41878	1.25673e-05	0.997834	0.000355
5595	MAPK3	0.699073	0.0241512	0.644739	0.0255288	0.994269	6.44e-05
29937	NENF	1.36008	0.000251	1.35581	0.000132601	0.994039	7.11e-05
2531	KDSR	1.45822	0.00231487	1.48641	6.3803e-05	0.993126	0.00144
91689	SMDT1	0.844555	0.00180538	0.87284	0.000639947	0.992717	0.000294
253982	ASPHD1	0.970322	0.00194207	1.1793	0.000307376	0.991206	7.78e-05
23612	PHLDA3	2.84356	8.29e-06	1.97456	4.32525e-05	0.989202	0.000141
147798	TMC4	0.999203	0.00818535	1.66161	0.00018181	0.984848	0.000301
6881	TAF10	0.603738	0.00812622	1.10598	9.20237e-05	0.983593	0.000173
1200	TPP1	0.872071	0.00441966	0.616145	0.0207255	0.983593	0.000173
283951	C16orf91	0.906786	0.000646	1.35249	2.31717e-05	0.981214	5.64e-05
4494	MT1F	1.31114	0.000144	2.91007	5.31989e-07	0.981095	0.000957
8507	ENC1	1.27661	0.000573	1.89319	2.12193e-05	0.980849	6.12e-05
201161	CENPV	1.38175	6.11e-05	2.30423	1.16259e-06	0.980533	7.32e-05
83637	ZMIZ2	0.561925	0.0154183	0.692749	0.0029541	0.978003	0.00182
527	ATP6V0C	0.587723	0.0086191	0.783981	0.000892857	0.977542	0.000138
84795	PYROXD2	0.739318	0.0342204	1.22858	0.00120504	0.976966	0.000427
83982	IFI27L2	1.06518	0.00361094	1.07658	0.00208393	0.976601	0.000294
5603	MAPK13	0.49591	0.0493495	0.542602	0.0233099	0.976332	0.000198
210	ALAD	0.80607	0.00104704	1.01288	0.000122629	0.97451	0.000186
6990	DYNLT3	1.25767	0.00012	1.51577	1.68761e-05	0.974379	0.000167
10489	LRRC41	0.794632	0.0152233	1.35534	0.000334023	0.973747	0.000142
3069	HDLBP	1.01529	0.00214755	1.06843	0.000919943	0.972726	8.74e-05
51307	FAM53C	1.0646	0.000165	2.22579	7.97447e-07	0.972265	7.78e-05
6286	S100P	1.09383	0.00045	4.17358	7.33212e-08	0.97072	0.000531
162394	SLFN5	2.2014	7.02e-05	3.82541	1.03194e-06	0.968692	0.0023
1534	CYB561	0.5019	0.045579	0.704686	0.00522748	0.968266	0.00212
56985	ADPRM	0.989894	0.00943126	2.50793	1.26853e-05	0.968058	0.000405
925	CD8A	0.785575	0.0162312	1.29294	0.000465381	0.965525	0.000579
54929	TMEM161A	0.845518	0.000794	1.11066	6.75667e-05	0.960535	0.000309
4828	NMB	1.13841	0.000315	1.10678	0.000202138	0.958097	8.07e-05
10262	SF3B4	0.602925	0.0352942	0.803074	0.0051082	0.956813	0.000294
11253	MAN1B1	0.936329	0.00492015	0.898882	0.00402247	0.955794	0.000998
56731	SLC2A4RG	0.853479	0.000975	1.61711	7.36824e-06	0.951833	7.49e-05
56834	GPR137	0.634315	0.0159208	0.788812	0.00290532	0.949882	0.000111
66035	SLC2A11	1.0736	0.000861	1.90367	0.000300096	0.946596	0.000125
11152	WDR45	0.99323	0.00314415	2.32794	6.15858e-06	0.94648	0.000331
10155	TRIM28	0.783039	0.001349	0.717037	0.00142289	0.945031	0.000111
7508	XPC	2.00482	4.86e-06	2.46887	6.72698e-07	0.943482	0.0017
27344	PCSK1N	1.2919	0.000632	1.03454	0.0015616	0.94307	0.000669
7033	TFF3	0.93619	0.027294	1.08129	0.00866487	0.941325	0.000326
53615	MBD3	0.660806	0.0162276	0.744383	0.00548301	0.940819	9.91e-05
55020	TTC38	0.958858	0.0406643	0.807573	0.00417191	0.939083	0.000244
55608	ANKRD10	1.10966	0.00136768	0.540971	0.0492279	0.937961	0.000194
135114	HINT3	1.10616	0.000799	1.70032	2.358e-05	0.937656	0.00201
219541	MED19	1.29511	0.00031	2.05688	7.36824e-06	0.935749	0.000152
5524	PTPA	0.698036	0.0129467	0.862628	0.00500361	0.934038	0.00057
58986	TMEM8A	0.736343	0.0126503	1.65713	3.94948e-05	0.932742	0.000152
10945	KDELR1	0.734551	0.00232384	0.633669	0.00223722	0.93252	0.000122
26001	RNF167	0.612677	0.0291227	0.704176	0.00960751	0.930491	0.000108
134147	CMBL	1.52465	5.07e-05	0.824332	0.00159594	0.930128	0.000153
2783	GNB2	0.613019	0.0130306	0.763858	0.00227585	0.927762	0.000103
149603	RNF187	0.780967	0.00468407	1.35648	7.04387e-05	0.925753	0.00019
93343	MVB12A	0.664847	0.00789329	1.13719	0.000142935	0.923145	0.000311
51686	OAZ3	1.05323	0.0055867	0.820759	0.0152157	0.920443	0.000322
3710	ITPR3	0.938901	0.0228555	1.10394	0.00632357	0.919843	0.000132
8904	CPNE1	0.865773	0.00127858	1.06653	0.000175784	0.915347	0.000395
64073	C19orf33	0.902188	0.000989	1.03655	0.000214719	0.913761	0.00018
8974	P4HA2	0.900514	0.00224732	0.62771	0.0123278	0.912957	0.000521
254428	SLC41A1	0.861069	0.00106223	0.701343	0.00237496	0.911316	0.000441
91289	LMF2	0.797153	0.030853	1.2946	0.00121622	0.911224	0.000244
441150	C6orf226	1.22099	0.00067	1.44071	0.000115865	0.90979	0.000219
5768	QSOX1	0.651154	0.0418199	0.620556	0.0380042	0.909363	0.000136
84954	MPND	0.882992	0.016327	1.89981	7.39855e-05	0.907841	0.000417
1353	COX11	0.80341	0.011094	0.661761	0.0214202	0.904319	0.00062
10227	MFSD10	1.13918	0.000768	1.63449	3.58363e-05	0.903471	0.00139
2316	FLNA	0.974341	0.013959	1.14175	0.00362831	0.902799	0.000386
80237	ELL3	1.5265	0.000226	0.644043	0.0262162	0.900442	9.74e-05
3257	HPS1	1.23902	0.0131477	2.00886	0.00039446	0.898818	0.000826
11328	FKBP9	0.639038	0.0299181	0.654794	0.0185742	0.895201	0.000155
57414	RHBDD2	1.43243	0.000191	2.38487	3.90868e-06	0.89446	0.00015
51147	ING4	0.742808	0.0158461	1.6213	6.45348e-05	0.894457	0.000407
64598	MOSPD3	0.812429	0.00468881	1.09873	0.000396699	0.893508	0.00178
51499	TRIAP1	1.53513	1.22e-05	1.27111	2.02351e-05	0.891776	9.86e-05
811	CALR	0.716584	0.0284518	0.411948	0.0406133	0.890476	0.00287
4833	NME4	1.01414	0.000323	1.11899	8.71066e-05	0.890177	0.0015
124565	SLC38A10	1.00321	0.00146618	0.812119	0.00339009	0.888107	0.000151
6892	TAPBP	1.03637	0.00162105	1.3251	0.000175336	0.887587	0.00519
3105	HLA-A	1.19393	0.00131485	1.25341	0.000552899	0.883939	0.00107
27163	NAAA	0.977757	0.000265	0.626517	0.00278361	0.883052	9.21e-05
3669	ISG20	0.896777	0.0322731	2.62147	4.92186e-06	0.882789	0.000764
8859	STK19	0.816449	0.00828841	1.38929	0.000157763	0.879682	0.000133
5824	PEX19	0.520546	0.0426264	1.12193	0.000281512	0.876801	0.00033
55652	SLC48A1	1.10732	0.000931	1.10053	0.000844247	0.871084	0.000572
55558	PLXNA3	0.77198	0.0301749	0.786735	0.0193033	0.87086	0.00283
4151	MB	0.854407	0.0016285	1.56686	1.55495e-05	0.870355	8.71e-05
113452	TMEM54	0.64429	0.0154548	0.690566	0.00699414	0.868784	0.000163
8991	SELENBP1	0.738539	0.0218771	0.919535	0.00424384	0.86699	0.000372
6322	SCML1	0.970372	0.00142524	2.04678	5.26128e-06	0.864865	0.000197
6320	CLEC11A	0.604951	0.0114734	1.15338	0.000107338	0.864818	0.000151
401115	C4orf48	0.906033	0.000736	1.15071	7.81478e-05	0.864498	0.000142
3155	HMGCL	0.998675	0.000391	2.18864	1.24841e-06	0.86124	0.000457
377	ARF3	0.653726	0.0174093	0.569735	0.024512	0.86122	0.000674
56898	BDH2	1.00906	0.00939224	0.926107	0.0101884	0.86071	0.000119
9124	PDLIM1	0.626151	0.0131853	0.519164	0.0242816	0.855082	0.000173
83442	SH3BGRL3	1.00303	0.00305706	0.929217	0.00303479	0.85417	0.000197
64147	KIF9	0.614064	0.00998968	0.643509	0.00496761	0.853118	0.000162
79095	C9orf16	1.41048	2.44e-05	1.97754	1.43673e-06	0.852961	0.000351
8905	AP1S2	1.03774	0.000324	1.13919	9.04426e-05	0.852373	0.00021
55082	ARGLU1	0.971512	0.00579712	1.8109	3.0142e-05	0.851933	0.000558
27315	PGAP2	0.891376	0.00104277	1.73639	6.57916e-06	0.851809	9.18e-05
401152	C4orf3	1.13377	0.000191	0.809553	0.000990803	0.851156	0.00012
2010	EMD	0.658378	0.00820993	1.1125	0.000163191	0.851126	0.000143
51257	MARCH2	0.915702	0.00372032	0.794387	0.00558469	0.849488	0.000474
84326	METTL26	1.03457	0.000288	1.27872	3.59358e-05	0.849156	0.000134
9830	TRIM14	0.737169	0.0204586	0.86971	0.00127911	0.848181	0.000197
113655	MFSD3	1.15749	0.00154095	2.50958	4.8422e-06	0.847877	0.000116
7297	TYK2	0.649188	0.0109388	1.51057	2.63503e-05	0.847207	0.00158
6992	PPP1R11	0.75327	0.00218916	1.23561	4.46887e-05	0.844507	0.000137
6199	RPS6KB2	0.86554	0.00278574	0.934308	0.00102186	0.840185	0.000821
6210	RPS15A	2.88186	3.14e-06	1.94992	1.64626e-05	0.839958	0.0025
54960	GEMIN8	0.9045	0.00262219	1.39726	8.09553e-05	0.839685	0.000514
7917	BAG6	0.955165	0.000519	0.821026	0.000801206	0.838963	0.000202
79188	TMEM43	0.928999	0.000411	1.8033	2.70393e-06	0.838004	0.000417
207	AKT1	0.734545	0.00536007	0.603463	0.0109478	0.837936	0.000246
79169	C1orf35	1.12551	0.00089	1.25258	0.000239703	0.837582	0.0015
91612	CHURC1	0.874315	0.00123719	0.978645	0.000331149	0.835833	0.000372
5296	PIK3R2	0.469844	0.0353955	0.879106	0.0081288	0.835672	0.000173
113246	C12orf57	0.606483	0.00442687	1.40032	9.84731e-06	0.834462	0.000372
9255	AIMP1	2.25514	0.0013118	2.45441	0.000429023	0.833785	0.000125
8237	USP11	0.561528	0.0425589	1.22255	0.000261263	0.832569	0.000457
83543	AIF1L	0.801747	0.00122223	0.483312	0.0161212	0.832213	0.000568
11072	DUSP14	1.20835	0.000301	1.18069	0.000186022	0.832165	0.000347
4714	NDUFB8	0.786263	0.00159495	1.10137	9.14705e-05	0.830964	0.0028
6302	TSPAN31	0.687144	0.0182664	1.32508	0.000179988	0.830954	0.000195
79762	C1orf115	0.795872	0.00787037	1.00766	0.00113493	0.830817	0.000684
8073	PTP4A2	0.54297	0.0166643	0.891069	0.000492862	0.830435	0.00101
2593	GAMT	1.02541	0.000713	0.638417	0.00832084	0.829933	0.000355
51083	GAL	1.15334	0.000137	0.895462	0.000392467	0.829731	0.000185
55621	TRMT1	0.786555	0.00825684	1.05081	0.000637044	0.829614	0.00287
3281	HSBP1	1.40023	4.9e-05	0.998004	0.000234742	0.828334	0.000232
2962	GTF2F1	0.48192	0.0458105	0.684591	0.00490967	0.827238	0.000338
122616	CLBA1	0.78157	0.00234425	1.54836	1.36769e-05	0.825884	0.00205
64847	SPATA20	0.952557	0.00209674	2.0611	6.81747e-06	0.825358	0.00407
25844	YIPF3	0.769572	0.00404892	1.13703	0.000179661	0.825043	0.000214
26020	LRP10	1.46763	0.0130911	1.21911	0.0239092	0.824587	0.000494
140465	MYL6B	0.702753	0.00247456	0.95539	0.000182574	0.824084	0.00018
55898	UNC45A	0.951808	0.00194282	0.49594	0.0470292	0.820642	0.00025
5478	PPIA	1.03928	0.000407	0.929148	0.000479559	0.820463	0.00013
6048	RNF5	0.631091	0.00873809	0.542707	0.0135762	0.819178	0.00034
11078	TRIOBP	0.627953	0.00996565	1.38561	3.38873e-05	0.819088	0.000329
665	BNIP3L	0.577472	0.0115215	0.751624	0.00148505	0.818708	0.00032
55974	SLC50A1	0.504499	0.0165141	1.03282	0.000104224	0.817193	0.000127
435	ASL	0.798641	0.0215674	1.54647	0.000218661	0.81454	0.000241
64219	PJA1	0.785547	0.00454035	1.31273	8.75111e-05	0.813841	0.000296
2760	GM2A	1.11593	0.000122	0.862642	0.000354169	0.812898	0.00017
23406	COTL1	0.959015	0.00128739	1.36551	6.58642e-05	0.81228	0.000353
57798	GATAD1	0.943656	0.000448	2.11193	1.24841e-06	0.809542	0.000164
1466	CSRP2	1.6096	0.000253	1.1504	0.0013252	0.809283	0.000862
55611	OTUB1	0.995511	0.00376195	1.06993	0.00025982	0.809242	0.00295
822	CAPG	0.748767	0.0224274	1.58848	0.000122778	0.805185	0.000948
10120	ACTR1B	0.639849	0.0372942	1.89101	2.65217e-05	0.804449	0.000878
57175	CORO1B	0.565692	0.02415	0.508002	0.029045	0.803741	0.000201
145748	LYSMD4	1.15448	0.00312488	0.813624	0.0155268	0.800884	0.00215
63874	ABHD4	1.58933	0.00105281	0.821228	0.0312034	0.800817	0.00576
5526	PPP2R5B	0.722469	0.0427742	1.09021	0.00305751	0.799679	0.000269
55829	SELENOS	0.691291	0.00199112	0.899345	0.000195539	0.79912	0.00153
677	ZFP36L1	1.04598	0.000862	1.84924	1.02205e-05	0.799045	0.000208
23625	FAM89B	0.743459	0.00271945	1.14907	8.42285e-05	0.798943	0.000132
25895	EEF1AKMT3	1.48783	0.000324	1.2072	0.000734142	0.797986	0.000243
10459	MAD2L2	0.72564	0.00617574	0.786133	0.00237568	0.79618	0.000279
10567	RABAC1	0.891301	0.000988	0.564663	0.0102019	0.794572	0.00143
79856	SNX22	0.783524	0.0363878	0.803209	0.0229539	0.79216	0.00318
54813	KLHL28	1.16555	0.00038	1.20897	0.000158584	0.791856	0.00158
51517	NCKIPSD	0.893916	0.00148096	1.11351	0.000190064	0.791302	0.000251
1152	CKB	0.571995	0.0405435	0.565002	0.0309408	0.79024	0.000179
51114	ZDHHC9	0.557693	0.0413582	1.35474	0.000116076	0.789714	0.000779
55163	PNPO	0.594586	0.00853906	1.11671	8.34304e-05	0.788503	0.00213
10162	LPCAT3	0.694123	0.0450332	1.31211	0.000755903	0.788395	0.000483
54921	CHTF8	0.54627	0.0111683	1.5289	8.01244e-06	0.786385	0.000255
23474	ETHE1	0.885843	0.0336839	1.46059	0.00124295	0.785503	0.00205
221830	TWISTNB	0.518583	0.0191466	1.10748	9.47507e-05	0.784865	0.000204
57176	VARS2	0.749931	0.00712127	1.5261	3.89598e-05	0.784679	0.000958
135154	SDHAF4	1.59163	0.000185	2.49914	4.71299e-06	0.782466	0.00242
93129	ORAI3	1.54714	0.000306	0.765111	0.0147818	0.782271	0.000301
5356	PLRG1	1.8053	0.00119868	1.43937	1.86838e-05	0.781958	0.00106
92579	G6PC3	0.832201	0.000955	1.08738	8.56821e-05	0.781705	0.000738
8508	NIPSNAP1	0.494451	0.0252452	0.832912	0.000719139	0.780012	0.000346
4267	CD99	1.21419	0.00163347	0.764528	0.00259829	0.777671	0.000214
6774	STAT3	0.889172	0.00858553	1.04737	0.0361062	0.776158	0.000917
2053	EPHX2	0.672481	0.0426092	0.743186	0.0186248	0.774875	0.00115
84929	FIBCD1	1.30569	0.00593171	1.6779	0.000734248	0.773682	0.000703
6612	SUMO3	0.813869	0.00224533	0.538822	0.0162991	0.772505	0.0017
79006	METRN	0.985863	0.000484	1.62075	9.24091e-06	0.772325	0.000277
10313	RTN3	0.557438	0.00951304	0.743171	0.00101033	0.771235	0.000184
11337	GABARAP	0.672396	0.00330577	0.82929	0.000501989	0.770556	0.000356
10974	ADIRF	1.35771	7.08e-05	1.82589	4.85224e-06	0.770426	0.000216
10922	FASTK	0.43339	0.0358259	1.30507	2.21728e-05	0.769462	0.00024
7542	ZFPL1	0.637064	0.0178667	1.20166	0.000203451	0.768597	0.00122
23363	OBSL1	1.13727	0.00188512	0.67843	0.0242298	0.767563	0.000445
11014	KDELR2	0.801283	0.00125898	0.480788	0.016952	0.766332	0.000197
2647	BLOC1S1	0.569164	0.0140888	0.894369	0.0005344	0.766232	0.000484
9274	BCL7C	0.771579	0.0148352	0.793175	0.00854623	0.764656	0.000945
345778	MTX3	1.34586	0.000284	2.07729	8.15573e-06	0.764486	0.000189
11243	PMF1	0.882921	0.00938708	0.672084	0.0273974	0.764444	0.00163
28992	MACROD1	0.597454	0.0241084	1.45579	5.33502e-05	0.760648	0.000403
51547	SIRT7	0.689688	0.0373465	1.198	0.00101364	0.759513	0.00139
160	AP2A1	0.726348	0.0328042	1.06382	0.00256451	0.759094	0.000745
54516	MTRF1L	0.909399	0.000493	1.3442	1.87505e-05	0.758943	0.000353
132299	OCIAD2	0.869132	0.00214071	0.955327	0.00067929	0.757349	0.000527
3654	IRAK1	1.89085	5.61e-05	1.50733	0.000123855	0.757128	0.000266
123	PLIN2	0.797544	0.00470835	1.47871	4.57043e-05	0.756842	0.00187
340542	BEX5	1.0356	0.00054	1.12749	0.000161745	0.756307	0.00811
84418	CYSTM1	0.616522	0.00463766	0.900002	0.000228771	0.756097	0.000389
3038	HAS3	1.66435	0.000603	1.34114	0.0012455	0.754639	0.000813
858	CAV2	1.46119	0.0020802	0.952792	0.0165759	0.753026	0.00138
1969	EPHA2	1.46861	0.000875	1.46575	0.000502011	0.75238	0.002
55851	PSENEN	0.830267	0.00155984	1.13927	0.000102303	0.752316	0.000485
400916	CHCHD10	0.670768	0.00490396	0.917087	0.000387483	0.751702	0.000294
57535	KIAA1324	0.886325	0.00642891	0.805373	0.0160031	0.750573	0.00118
84266	ALKBH7	0.508875	0.0302012	0.658344	0.00500054	0.749561	0.000319
6386	SDCBP	0.933137	0.000773	1.1107	0.000127517	0.74773	0.000357
27243	CHMP2A	0.834342	0.00571401	0.96181	0.00145771	0.746623	0.00103
7389	UROD	0.756857	0.00153649	0.941706	0.000198815	0.744371	0.000194
113419	TEX261	0.850042	0.00281502	1.06942	0.000363321	0.743942	0.000305
84993	UBL7	1.06583	0.0015382	0.831249	0.00448669	0.743592	0.000314
10589	DRAP1	0.868456	0.000613	0.658842	0.00214754	0.742756	0.00151
55781	RIOK2	0.792214	0.038314	1.46599	1.52853e-05	0.742751	0.000329
81876	RAB1B	0.880396	0.000753	0.645233	0.00327342	0.742211	0.000269
126299	ZNF428	0.538016	0.0334882	0.846589	0.00167505	0.741859	0.000387
9887	SMG7	0.5147	0.0341346	1.27357	7.78855e-05	0.739912	0.00546
9419	CRIPT	1.04347	0.00026	1.42146	1.68365e-05	0.737965	0.00079
147184	TMEM99	0.941963	0.00288427	1.85145	1.79059e-05	0.737653	0.00048
51596	CUTA	0.849643	0.000957	1.18476	5.56973e-05	0.736957	0.00021
4291	MLF1	1.11194	0.000736	1.26256	0.000167494	0.736876	0.00152
81873	ARPC5L	0.681748	0.00289515	1.29875	2.20107e-05	0.734104	0.00111
154791	FMC1	0.825578	0.00144008	1.09801	0.000142221	0.733317	0.000516
5355	PLP2	1.00386	0.000279	0.746994	0.00112304	0.731859	0.000483
26063	DECR2	0.625132	0.00716112	1.12307	9.07744e-05	0.731159	0.000418
222068	TMED4	1.67987	9.05e-05	0.771832	0.000801195	0.731051	0.00031
7528	YY1	0.820884	0.00295492	1.50248	1.48682e-05	0.729056	0.000238
5349	FXYD3	1.40154	0.000146	0.755577	0.00464748	0.729021	0.000732
5272	SERPINB9	0.508686	0.0343969	0.51904	0.0220977	0.728486	0.0023
1212	CLTB	0.883882	0.000931	0.800809	0.00103311	0.726133	0.00163
23177	CEP68	1.1327	0.00311455	1.00037	0.00419813	0.724424	0.000344
55585	UBE2Q1	0.844688	0.0273721	0.577046	0.00499944	0.724404	0.000706
90410	IFT20	0.785187	0.00140213	0.963873	0.000197966	0.723784	0.000241
10263	CDK2AP2	0.560866	0.0171075	0.765164	0.00176189	0.722225	0.000425
9130	FAM50A	0.568217	0.0220772	0.493206	0.0313934	0.721071	0.000521
26993	AKAP8L	0.760034	0.0337078	2.36176	1.66178e-05	0.720816	0.00109
11040	PIM2	0.593443	0.0404698	0.645846	0.0189891	0.720523	0.000303
1512	CTSH	0.62289	0.00955904	0.504138	0.0204891	0.714411	0.00129
55049	REX1BD	0.935909	0.000882	2.17505	1.8224e-06	0.713361	0.000466
8623	ASMTL	0.766342	0.00329257	0.547015	0.0152073	0.712952	0.000582
7286	TUFT1	0.506536	0.0310892	2.86771	4.28055e-07	0.712649	0.000621
373156	GSTK1	0.989942	0.00111132	1.73376	1.41692e-05	0.712462	0.000311
5264	PHYH	1.53237	0.00129775	1.05652	0.00803002	0.712342	0.00803
5430	POLR2A	0.543526	0.0190277	1.46357	1.97604e-05	0.711253	0.000743
1727	CYB5R3	0.578751	0.0215224	0.556617	0.0182678	0.707582	0.00053
23433	RHOQ	0.41078	0.0403351	1.42702	1.0238e-05	0.707376	0.000488
23641	LDOC1	0.451418	0.0402051	0.462032	0.0258156	0.705992	0.002
10490	VTI1B	0.695608	0.00327768	0.883608	0.00493613	0.704711	0.00033
5827	PXMP2	0.586896	0.0111314	0.815614	0.000922532	0.703919	0.000463
5424	POLD1	0.554063	0.0248936	1.3961	4.44815e-05	0.703328	0.000513
3275	PRMT2	1.17127	0.00023	1.17446	0.00387107	0.702754	0.000691
6277	S100A6	0.937287	0.00154527	0.834621	0.00195216	0.702339	0.00209
6472	SHMT2	0.599917	0.0163379	2.23718	2.05104e-06	0.699853	0.000472
440	ASNS	0.595973	0.00680334	3.2656	1.16105e-07	0.699824	0.000511
10245	TIMM17B	0.649728	0.0105764	0.642924	0.00744601	0.699819	0.000418
3485	IGFBP2	0.737599	0.0286462	0.679566	0.0303363	0.699216	0.000902
1052	CEBPD	0.804138	0.00788283	1.16221	0.000461702	0.698688	0.000642
84163	GTF2IRD2	0.689981	0.00813037	1.44152	3.80656e-05	0.69839	0.000866
9921	RNF10	0.891201	0.0119031	1.05152	0.000376372	0.695615	0.000521
10581	IFITM2	0.74748	0.0030081	0.582798	0.00851754	0.694551	0.00041
51079	NDUFA13	0.460522	0.0228291	0.722034	0.00101736	0.694179	0.0443
23241	PACS2	0.845415	0.0125041	0.807098	0.0109034	0.690406	0.00219
27244	SESN1	3.41258	1.66e-06	0.948715	0.00294564	0.68931	0.0012
5425	POLD2	0.703173	0.00490396	0.912929	0.000554891	0.688676	0.000594
51241	COX16	1.56611	5.66e-05	0.750035	0.00384875	0.68793	0.0105
9538	EI24	0.999055	0.000421	0.708535	0.00315867	0.687699	0.00525
1317	SLC31A1	0.70868	0.00404841	1.57991	1.11879e-05	0.687088	0.00145
163	AP2B1	0.935132	0.00480828	1.06502	0.00131573	0.686089	0.000789
8824	CES2	0.573311	0.00746283	1.08465	6.73965e-05	0.685576	0.00133
56647	BCCIP	1.21033	0.000744	1.17975	0.000492862	0.685055	0.00181
54539	NDUFB11	0.925607	0.000573	1.16699	6.35387e-05	0.684931	0.000384
84450	ZNF512	1.1802	0.00350297	1.79204	0.000125468	0.684861	0.000643
27034	ACAD8	1.09522	0.0159387	0.807273	0.0497272	0.684211	0.00109
374291	NDUFS7	0.734622	0.00402745	1.18868	9.51185e-05	0.683754	0.000487
10838	ZNF275	0.895733	0.00646009	1.11736	0.000997219	0.682546	0.00107
826	CAPNS1	0.66384	0.00337607	0.450333	0.0203338	0.679982	0.00124
84817	TXNDC17	0.578131	0.0055867	0.403035	0.0270071	0.679216	0.00147
10239	AP3S2	0.961458	0.00124073	2.06247	4.25496e-06	0.678963	0.000558
1725	DHPS	0.575155	0.0132115	0.862804	0.000675115	0.678665	0.000477
7076	TIMP1	0.943046	0.000309	0.56532	0.00491261	0.677179	0.000439
9391	CIAO1	1.33991	0.00015	1.5931	2.3695e-05	0.677011	0.000502
55471	NDUFAF7	0.589835	0.0141605	0.869919	0.000827105	0.675065	0.0218
2873	GPS1	0.743646	0.00726523	0.721504	0.0056163	0.674884	0.00358
8894	EIF2S2	1.11277	0.0234779	0.728943	0.00111842	0.674791	0.00116
51569	UFM1	0.780481	0.00879152	1.31735	0.00198172	0.673562	0.000867
26173	INTS1	1.04064	0.00470835	1.03399	0.00307298	0.673507	0.00942
51282	SCAND1	0.825004	0.00360359	1.57786	2.72961e-05	0.673026	0.00164
384	ARG2	1.26046	0.00014	1.94777	3.98947e-06	0.67172	0.00367
10741	RBBP9	0.544026	0.0424868	0.641349	0.0131234	0.670978	0.00114
80194	TMEM134	1.11055	0.000179	1.36817	2.23109e-05	0.66954	0.00117
9902	MRC2	0.565356	0.015508	0.563495	0.0106946	0.66797	0.00846
51604	PIGT	0.798839	0.00322204	0.841863	0.00141267	0.666011	0.000649
115098	CCDC124	0.859306	0.00220687	0.490119	0.0340543	0.664812	0.00131
258010	SVIP	0.979107	0.000461	0.624657	0.00489644	0.663135	0.00141
3217	HOXB7	1.51372	0.000185	2.01218	1.40343e-05	0.662543	0.00115
10983	CCNI	0.600803	0.0113524	1.23455	6.42747e-05	0.662264	0.00742
334	APLP2	0.912622	0.00104485	1.02449	0.00144217	0.662149	0.00101
84950	PRPF38A	1.50469	0.000182	0.825346	0.000930197	0.661436	0.00747
2810	SFN	1.45461	1.83e-05	0.905685	0.000216312	0.661404	0.000377
29894	CPSF1	0.748843	0.00386618	1.115	0.000160668	0.661294	0.00575
55316	RSAD1	0.636924	0.00990136	1.16495	0.000118726	0.660894	0.00221
4701	NDUFA7	1.06503	0.000277	1.5597	1.11554e-05	0.658948	0.000991
11188	NISCH	0.902015	0.0270687	1.22236	0.00277631	0.656631	0.00185
56965	PARP6	0.80417	0.00936443	1.41284	0.000146633	0.654906	0.0019
23463	ICMT	0.846536	0.00350492	0.773211	0.00383582	0.654863	0.000613
81602	CDADC1	0.91307	0.00105289	2.07449	2.54065e-06	0.654747	0.0015
307	ANXA4	1.15479	0.000275	0.588219	0.0115245	0.654304	0.00305
85013	TMEM128	1.10515	0.00031	1.76861	7.02047e-06	0.652462	0.000628
25941	TPGS2	0.75563	0.00145584	1.2118	0.000347461	0.651548	0.000448
5886	RAD23A	0.524849	0.0274644	1.00696	0.000329807	0.651376	0.00145
9812	DELE1	1.57	0.00056	2.37103	1.83335e-05	0.651354	0.0049
84681	HINT2	0.729921	0.00158662	1.43956	9.29113e-06	0.651289	0.000498
155054	ZNF425	0.932441	0.00621624	1.91142	3.15854e-05	0.651245	0.0061
1676	DFFA	0.429166	0.0465418	0.542117	0.0100135	0.650688	0.0022
23767	FLRT3	1.36136	0.00527519	2.37007	7.92464e-05	0.650206	0.0146
10410	IFITM3	0.750067	0.00389339	0.742869	0.00256343	0.649872	0.00592
84991	RBM17	1.52455	0.000135	1.12013	0.000562569	0.64967	0.00444
23229	ARHGEF9	0.533906	0.0427656	0.76568	0.00422242	0.648202	0.00747
54471	MIEF1	0.822807	0.00672966	1.71131	3.14341e-05	0.648172	0.000691
6051	RNPEP	0.905742	0.000977	0.716733	0.00262251	0.647953	0.000731
29099	COMMD9	0.485977	0.0432872	0.523852	0.0216143	0.647945	0.000703
5641	LGMN	0.872449	0.00551841	1.34773	0.000188943	0.64697	0.00141
54996	MARC2	0.787846	0.0225218	1.34243	0.000568883	0.646648	0.00329
10205	MPZL2	1.58973	0.000413	1.27856	0.00100224	0.646544	0.00101
60558	GUF1	0.981262	0.00188252	0.649092	0.0141025	0.644261	0.00112
100	ADA	0.796305	0.00638224	1.18147	0.000298203	0.642914	0.000677
79600	TCTN1	0.71938	0.0149037	0.768884	0.00684355	0.642657	0.000628
56948	SDR39U1	0.665596	0.0184538	1.46964	7.25924e-05	0.642582	0.00125
6016	RIT1	1.93284	9.49e-05	1.72734	9.80458e-05	0.641205	0.00105
116228	COX20	0.924314	0.00105715	1.21102	9.31402e-05	0.640689	0.000577
8574	AKR7A2	0.780949	0.00146127	1.19869	4.53546e-05	0.639982	0.00127
10618	TGOLN2	0.659585	0.00530749	0.411222	0.0439499	0.63981	0.0015
1777	DNASE2	0.646324	0.00420235	1.42695	1.25673e-05	0.639637	0.000565
25915	NDUFAF3	0.676327	0.0126813	1.1934	0.000207822	0.639049	0.000626
65003	MRPL11	0.7291	0.0043867	0.506251	0.0225008	0.637604	0.00465
282991	BLOC1S2	0.957241	0.00174505	0.785731	0.00371064	0.637272	0.0135
2896	GRN	0.921398	0.000942	0.682485	0.00383304	0.635468	0.00269
59274	TLNRD1	0.791954	0.00169143	1.14855	7.80214e-05	0.635402	0.000528
10943	MSL3	0.805083	0.00191921	0.489017	0.0224457	0.634911	0.000791
5565	PRKAB2	1.49922	5.49e-05	2.54941	9.70911e-07	0.633036	0.0043
5092	PCBD1	1.07993	0.000154	1.04061	9.99941e-05	0.632509	0.000564
25798	BRI3	0.636916	0.0194443	1.6858	2.29096e-05	0.632458	0.00182
5510	PPP1R7	0.645874	0.0053721	0.957315	0.00259233	0.629443	0.000507
5777	PTPN6	0.920757	0.0029118	1.33354	0.000141391	0.628221	0.000589
11334	TUSC2	1.05178	0.00202313	1.11348	0.000826979	0.62663	0.000974
1514	CTSL	0.914277	0.000761	1.29604	3.85448e-05	0.625706	0.000855
51667	NUB1	0.877221	0.00122125	1.70101	7.95694e-06	0.623288	0.00351
203	AK1	0.83818	0.00278235	0.590074	0.0393426	0.623024	0.000906
23596	OPN3	0.857941	0.0055146	1.04871	0.000951547	0.622332	0.00666
1643	DDB2	1.44423	3.14e-05	0.44641	0.027746	0.620975	0.000798
2987	GUK1	1.01128	0.000227	1.12343	5.74759e-05	0.62071	0.00112
84747	UNC119B	0.72456	0.00410398	1.35247	3.70886e-05	0.620633	0.000861
9878	TOX4	1.12447	0.0107252	1.72061	0.00045655	0.62044	0.000881
50848	F11R	0.47228	0.0241399	1.35492	1.78578e-05	0.62019	0.00326
51097	SCCPDH	0.542266	0.0336213	0.83913	0.0018698	0.61942	0.00449
6692	SPINT1	0.579444	0.0424617	0.58558	0.0291551	0.619095	0.00129
26270	FBXO6	0.801766	0.00467267	0.954153	0.000947525	0.618043	0.00171
10682	EBP	0.423536	0.0372966	1.27858	2.31561e-05	0.617292	0.0193
54555	DDX49	0.746192	0.00767199	1.03972	0.000136637	0.615897	0.00142
9785	DHX38	1.38858	0.000139	1.56785	3.08234e-05	0.613732	0.00355
1141	CHRNB2	0.853845	0.0116446	0.653587	0.0321736	0.61364	0.0108
2286	FKBP2	0.68854	0.0274965	0.565163	0.0496442	0.611006	0.000991
975	CD81	0.7088	0.00467751	0.758208	0.0019134	0.609396	0.000797
51647	CIAO2B	0.656646	0.0030176	0.849239	0.000324676	0.608817	0.000579
2194	FASN	0.51741	0.0465546	0.676722	0.0082148	0.608335	0.00361
120071	LARGE2	0.699411	0.0431197	0.744991	0.0228615	0.607641	0.0263
5281	PIGF	0.91767	0.000618	0.94605	0.000464155	0.606135	0.00209
83986	FAM234A	0.702704	0.00342037	0.699495	0.00217076	0.605173	0.00103
389	RHOC	0.896933	0.00222976	0.878977	0.00153261	0.604364	0.000854
51150	SDF4	0.692458	0.00322539	0.722877	0.00538309	0.603996	0.002
3916	LAMP1	0.736884	0.00422909	0.604104	0.00586157	0.603682	0.0174
4696	NDUFA3	0.841572	0.000899	1.04237	0.000114761	0.603646	0.00205
388722	C1orf53	1.26618	8.79e-05	1.20186	6.10632e-05	0.60252	0.00353
7846	TUBA1A	0.776999	0.00173565	1.53127	1.0306e-05	0.602024	0.00939
196264	MPZL3	0.657201	0.0147588	1.25773	0.000143979	0.601595	0.000951
706	TSPO	0.799597	0.00236065	0.991975	0.00032917	0.600951	0.00117
7263	TST	0.668903	0.0105822	0.467375	0.0453284	0.598312	0.00137
280636	SELENOH	0.830417	0.000722	0.978344	0.000126641	0.598101	0.00169
5830	PEX5	1.00896	0.000703	1.13255	0.00017297	0.597447	0.0283
51428	DDX41	0.761326	0.00338655	0.920699	0.000589281	0.59737	0.00579
57335	ZNF286A	0.603498	0.0125948	0.647632	0.00553803	0.59543	0.00346
29893	PSMC3IP	0.960412	0.000312	1.53912	7.02047e-06	0.594712	0.00509
23475	QPRT	0.682613	0.00221956	2.03519	1.0115e-06	0.589396	0.00338
9553	MRPL33	0.628057	0.00966026	1.01445	0.000275397	0.588496	0.00138
64853	AIDA	0.44869	0.0329289	0.803664	0.000684652	0.588162	0.00163
54344	DPM3	1.12202	0.000375	1.5797	1.97604e-05	0.587698	0.00284
55011	PIH1D1	0.442662	0.0497857	0.724224	0.00229433	0.586775	0.000933
9524	TECR	0.96173	0.000331	0.49097	0.0133568	0.585797	0.00164
2752	GLUL	1.25917	0.00037	0.90794	0.000286018	0.585735	0.00244
8940	TOP3B	0.910143	0.00311085	2.04655	8.52044e-05	0.58539	0.00124
1939	EIF2D	0.497688	0.0382078	0.650932	0.00631623	0.585326	0.000797
1465	CSRP1	0.593984	0.0115215	0.882252	0.000611747	0.584866	0.00116
79144	PPDPF	0.844829	0.001349	1.86516	6.26764e-06	0.58427	0.00203
4898	NRDC	0.614977	0.00646009	0.529779	0.010023	0.583743	0.00461
7138	TNNT1	0.53348	0.0153332	0.596974	0.0053456	0.5815	0.00117
25839	COG4	0.562592	0.0143396	0.729028	0.00197751	0.580719	0.000954
79090	TRAPPC6A	0.791513	0.00276594	1.96908	3.72413e-06	0.58016	0.00165
3423	IDS	0.953314	0.00109749	0.739466	0.00667978	0.579775	0.000948
6891	TAP2	1.00934	0.00863906	1.60224	0.000269939	0.577168	0.00484
10950	BTG3	1.67783	7.55e-05	1.6267	4.52742e-05	0.575502	0.00126
26227	PHGDH	0.90967	0.00115929	2.77008	5.31989e-07	0.575255	0.00195
22921	MSRB2	0.448225	0.0452516	1.19985	6.96471e-05	0.574579	0.00611
21	ABCA3	0.854029	0.00115138	0.500707	0.0177585	0.574564	0.00579
1389	CREBL2	0.491587	0.0311176	0.595402	0.00769482	0.570728	0.00215
427	ASAH1	0.656093	0.00343225	0.836604	0.00119311	0.570619	0.00453
29914	UBIAD1	0.813249	0.00213226	0.505592	0.0216674	0.570574	0.000865
5860	QDPR	0.644406	0.00980804	0.87498	0.000925641	0.570094	0.00656
7428	VHL	0.775841	0.0080528	1.95673	1.07854e-05	0.569911	0.002
10652	YKT6	0.533316	0.0459157	0.920964	0.00142912	0.568096	0.0032
6648	SOD2	0.795327	0.00235228	0.640481	0.0479229	0.566518	0.00128
119391	GSTO2	0.566272	0.0119869	0.919928	0.00034761	0.566359	0.00661
10437	IFI30	0.686739	0.00296072	0.389373	0.0435467	0.566066	0.00232
55540	IL17RB	1.39742	0.000226	1.17844	0.000377427	0.565809	0.00357
50865	HEBP1	0.441475	0.0408061	0.553007	0.00884792	0.564928	0.00115
84292	WDR83	1.0158	0.000842	1.01291	0.000483276	0.56452	0.00169
10069	RWDD2B	0.66539	0.00388245	2.18107	9.89457e-07	0.564039	0.00283
10067	SCAMP3	0.458225	0.0285677	0.823374	0.000548868	0.563035	0.00238
119032	BORCS7	1.08038	0.000853	0.919801	0.00143049	0.563003	0.00324
1819	DRG2	0.556075	0.0222051	0.54189	0.0176185	0.560482	0.00091
387882	C12orf75	0.446214	0.0472326	0.488859	0.0220019	0.559582	0.00184
54499	TMCO1	0.696528	0.00601894	0.469706	0.0337123	0.555964	0.0015
567	B2M	0.492391	0.0181505	0.588473	0.00436397	0.555673	0.00153
84299	MIEN1	0.770558	0.00188484	1.10613	9.31458e-05	0.554904	0.00158
55246	CCDC25	1.11103	0.0090091	2.04892	9.99215e-05	0.553195	0.00123
1719	DHFR	1.06393	0.000565	0.789216	0.00229605	0.551917	0.0056
79004	CUEDC2	0.893169	0.00416067	0.531817	0.0449509	0.551804	0.00125
2677	GGCX	0.651659	0.0161373	0.855035	0.00242187	0.549151	0.00678
55696	RBM22	0.862038	0.000853	1.43548	8.39465e-05	0.548568	0.0147
10330	CNPY2	0.673123	0.00473581	0.797396	0.000752175	0.547222	0.0015
4259	MGST3	0.723334	0.00325185	0.676312	0.0030582	0.545648	0.00242
6834	SURF1	0.609212	0.00787016	1.38073	2.12193e-05	0.54517	0.0012
694	BTG1	1.02437	0.00222781	1.18499	0.000501117	0.544931	0.00152
7390	UROS	0.894095	0.00144552	1.84767	6.21059e-06	0.544877	0.00204
54972	TMEM132A	0.782779	0.0352734	0.88795	0.0129565	0.544778	0.003
26751	SH3YL1	0.612805	0.00410253	0.480643	0.0110486	0.544759	0.00111
977	CD151	0.708058	0.00610047	0.529459	0.0204333	0.543606	0.00249
80762	NDFIP1	0.646959	0.00911006	0.57752	0.0338864	0.543404	0.0112
4738	NEDD8	0.624956	0.00428734	0.426664	0.0240332	0.543174	0.000942
2937	GSS	0.545158	0.0299578	0.510086	0.018101	0.542678	0.0021
81579	PLA2G12A	0.987409	0.00352576	1.07749	0.00123718	0.541931	0.00234
5208	PFKFB2	1.11338	0.000373	1.6109	1.65378e-05	0.540478	0.0153
25796	PGLS	0.630564	0.00776382	1.04943	0.00016923	0.540399	0.00493
6443	SGCB	0.912385	0.000377	1.73036	2.85566e-06	0.538535	0.016
1025	CDK9	1.49706	0.000652	2.33811	1.71882e-05	0.538362	0.00177
55975	KLHL7	0.755768	0.00271377	0.819885	0.000961336	0.53754	0.01
84317	CCDC115	0.994573	0.000269	0.805972	0.000602653	0.536324	0.00133
10916	MAGED2	0.682196	0.00535831	0.796685	0.00125173	0.535156	0.00839
7319	UBE2A	0.817341	0.00479293	0.679097	0.00398414	0.534389	0.00207
123803	NTAN1	0.979635	0.00358118	0.884516	0.00486299	0.533751	0.0011
6419	SETMAR	0.774909	0.00352579	0.962059	0.000515375	0.533671	0.00304
55128	TRIM68	0.718722	0.023201	2.80387	2.34548e-06	0.531537	0.0036
25873	RPL36	0.513391	0.020517	0.861107	0.00055766	0.531342	0.00386
90121	TSR2	0.750984	0.00449084	0.967017	0.000528936	0.530172	0.00721
2135	EXTL2	0.579382	0.0190746	0.597998	0.0109487	0.52946	0.00232
10053	AP1M2	1.02675	0.000435	0.493438	0.022813	0.529269	0.00278
2879	GPX4	0.48876	0.0328733	0.666384	0.00405545	0.529184	0.00166
340719	NANOS1	0.859313	0.00109748	0.943356	0.000331263	0.526506	0.00167
26272	FBXO4	0.776601	0.00635409	0.711041	0.00690725	0.525016	0.0267
170622	COMMD6	0.716836	0.0029462	1.11032	8.99896e-05	0.524042	0.00245
84656	GLYR1	0.534726	0.0210181	0.964989	0.000347461	0.520275	0.0129
51255	RNF181	0.463496	0.0217193	0.776016	0.000607306	0.518869	0.0033
2314	FLII	0.824094	0.0029528	0.835642	0.000483276	0.518584	0.00233
93974	ATP5IF1	1.06368	0.000851	0.445737	0.0293318	0.518082	0.00137
51011	FAHD2A	0.710252	0.00571401	1.48607	2.48262e-05	0.517806	0.00282
79671	NLRX1	0.900525	0.0225952	1.07579	0.00567202	0.517646	0.00225
65258	MPPE1	0.93031	0.00460033	1.46587	0.000133174	0.515506	0.00192
65109	UPF3B	0.605593	0.00688957	0.961891	0.000202352	0.515296	0.00338
5037	PEBP1	0.793024	0.00169143	0.93572	0.000323634	0.515143	0.00559
25776	CBY1	0.498613	0.0292595	1.12558	0.000115865	0.513748	0.00226
3491	CYR61	1.04278	0.00853042	1.20739	0.013244	0.512732	0.0109
493753	COA5	0.790861	0.00175393	1.38037	2.32146e-05	0.51257	0.00262
10975	UQCR11	0.618706	0.0039632	0.983007	0.000105632	0.511874	0.00166
25828	TXN2	0.80387	0.00555112	0.57981	0.0226742	0.511393	0.00567
9238	TBRG4	0.523413	0.0418759	0.557883	0.0220019	0.509667	0.00316
2021	ENDOG	0.952748	0.000336	0.480131	0.014518	0.508812	0.00237
84261	FBXW9	1.01921	0.000552	1.78385	6.90463e-06	0.508664	0.00738
50862	RNF141	1.08867	0.00597615	0.912303	0.0108465	0.508365	0.0104
5480	PPIC	0.681235	0.00500832	0.486193	0.0219903	0.507468	0.00768
9516	LITAF	0.482601	0.0222805	0.598774	0.00593687	0.50728	0.00257
23788	MTCH2	1.02218	0.000584	0.576401	0.0123266	0.506073	0.0024
30000	TNPO2	0.749245	0.0096643	1.72293	3.01841e-05	0.505732	0.00489
29058	TMEM230	0.723248	0.00404461	0.783319	0.000813712	0.505161	0.00592
7586	ZKSCAN1	1.14649	0.000118	2.47157	5.21171e-07	0.503154	0.00522
200634	KRTCAP3	0.6993	0.0166526	0.685443	0.0126554	0.503012	0.00171
10591	DNPH1	0.915623	0.000652	1.59874	8.33749e-06	0.50298	0.00393
22818	COPZ1	0.474837	0.0385346	0.828744	0.00102211	0.500301	0.0026
11052	CPSF6	0.639169	0.0105553	1.07075	0.000237699	0.499237	0.00194
84269	CHCHD5	0.588618	0.0392429	0.859645	0.00332896	0.497407	0.0123
51248	PDZD11	0.980893	0.000457	0.885655	0.000503265	0.496026	0.00353
8409	UXT	0.536766	0.0162923	0.51992	0.0131851	0.494939	0.00861
1652	DDT	0.680362	0.00326848	0.70502	0.0016009	0.494715	0.00293
220074	LRTOMT	1.04465	0.00783606	1.49398	0.000492862	0.494645	0.0237
65264	UBE2Z	0.70987	0.0486804	1.39615	0.000652435	0.493723	0.00737
475	ATOX1	0.801183	0.00183819	0.699842	0.00262693	0.493657	0.00199
54849	DEF8	0.714259	0.00195581	1.69007	3.00635e-05	0.492035	0.00358
127687	C1orf122	0.460831	0.0332747	0.715538	0.00180376	0.490957	0.00281
64343	AZI2	0.728113	0.0213102	2.18555	1.11707e-05	0.490417	0.00205
25824	PRDX5	0.706492	0.00312668	1.25636	2.64778e-05	0.489992	0.00571
1347	COX7A2	0.755377	0.00266506	1.05899	0.000159876	0.489799	0.00428
54935	DUSP23	0.480613	0.0465458	0.613884	0.00939777	0.488727	0.00167
126328	NDUFA11	0.625864	0.0238441	1.37131	0.00010674	0.488549	0.0122
2639	GCDH	0.804681	0.0154705	1.23223	0.000718893	0.487952	0.00258
381	ARF5	0.814119	0.00187461	0.917499	0.000497309	0.487943	0.00717
113791	PIK3IP1	0.59704	0.0415222	0.722637	0.0110298	0.487924	0.0224
7587	ZNF37A	1.0792	0.00332162	1.29674	0.000603003	0.487538	0.00225
57095	PITHD1	0.508367	0.0204682	0.881844	0.000439701	0.485769	0.00396
92312	MEX3A	0.499881	0.0329112	0.54935	0.0142387	0.48504	0.00932
5500	PPP1CB	0.877714	0.00813037	0.578196	0.0124916	0.484737	0.00789
2017	CTTN	1.38575	0.00135015	2.09928	4.57452e-05	0.483284	0.00681
6993	DYNLT1	0.640768	0.00352389	0.811374	0.000449179	0.48215	0.00699
10577	NPC2	0.63164	0.00871402	1.19093	8.32354e-05	0.482011	0.00272
84105	PCBD2	1.79678	0.00585481	1.91213	0.00250384	0.481496	0.00966
51125	GOLGA7	0.665211	0.00270476	0.850721	0.000310398	0.480348	0.00452
7264	TSTA3	0.746975	0.00636777	0.612732	0.0129699	0.479674	0.00314
3956	LGALS1	0.612337	0.00705359	0.46768	0.0209112	0.478955	0.00786
220002	CYB561A3	0.937895	0.00104394	0.901237	0.000783658	0.478759	0.0034
51263	MRPL30	0.489532	0.032371	0.523612	0.0161692	0.476925	0.0076
90850	ZNF598	0.880739	0.0420929	1.47786	0.00121869	0.474776	0.00373
5720	PSME1	0.716692	0.00278338	0.476965	0.0189891	0.474531	0.00536
2744	GLS	2.00796	0.000154	1.32305	0.000482547	0.474144	0.0182
256281	NUDT14	0.701534	0.00911442	1.40868	5.77613e-05	0.473728	0.0153
653784	MZT2A	0.584424	0.00737203	0.949447	0.000187889	0.473663	0.00309
54107	POLE3	0.612232	0.00614162	0.652922	0.00259829	0.473522	0.00226
729967	MORN2	0.877406	0.00211133	0.79303	0.00244392	0.470247	0.019
6950	TCP1	0.545706	0.0192315	0.822971	0.0129462	0.470174	0.00357
6625	SNRNP70	0.826649	0.000813	0.570025	0.00514572	0.469964	0.0101
4074	M6PR	0.583912	0.0079507	0.922579	0.000250789	0.469854	0.00581
26263	FBXO22	1.30394	5.38e-05	1.52901	9.0239e-06	0.469673	0.0176
29927	SEC61A1	0.86973	0.000741	0.838319	0.000530038	0.467966	0.00387
9296	ATP6V1F	0.674834	0.00373646	0.752894	0.00113855	0.467814	0.00411
51614	ERGIC3	0.735129	0.00162224	0.911347	0.000216946	0.467761	0.00291
2040	STOM	1.60672	7.73e-05	1.04344	0.000772716	0.466195	0.0347
4358	MPV17	1.13294	0.000226	0.809369	0.00117009	0.466047	0.00284
4601	MXI1	0.850977	0.00208908	1.26006	8.47002e-05	0.465645	0.0112
9158	FIBP	0.52927	0.0255372	0.60253	0.00871385	0.463907	0.00293
125150	ZSWIM7	0.486246	0.0274105	0.564535	0.00846124	0.462898	0.00322
6727	SRP14	0.433461	0.0333595	0.610042	0.00337941	0.462605	0.00435
11267	SNF8	0.680868	0.00718537	0.76207	0.00229095	0.461254	0.00587
23593	HEBP2	0.627805	0.00551841	1.1394	6.31772e-05	0.460726	0.00304
11112	HIBADH	0.729242	0.00230989	0.404166	0.0402803	0.459456	0.00415
22916	NCBP2	0.606208	0.0156602	1.11416	0.000204872	0.458995	0.00296
10327	AKR1A1	0.736925	0.00567225	1.84564	7.6283e-06	0.458647	0.00714
23787	MTCH1	0.467983	0.0306132	0.502102	0.0149569	0.458586	0.00416
55845	BRK1	0.90285	0.00295608	1.04071	0.000701214	0.455435	0.00791
29087	THYN1	0.697089	0.0190972	0.66483	0.0168822	0.455296	0.0155
92400	RBM18	0.898883	0.00170649	1.17557	0.000159367	0.455241	0.0132
23479	ISCU	0.906948	0.000383	1.09688	5.66013e-05	0.454366	0.00355
391356	PTRHD1	0.672435	0.00373646	0.58774	0.00535343	0.453581	0.00382
5699	PSMB10	0.748205	0.0290419	1.11544	0.00195216	0.450971	0.00747
84333	PCGF5	1.20317	0.00108968	1.05597	0.00150216	0.450573	0.027
10195	ALG3	0.590582	0.0133612	0.616598	0.00697204	0.449602	0.00866
90637	ZFAND2A	0.823731	0.00111944	1.49499	1.11879e-05	0.446539	0.018
175	AGA	0.766271	0.00650927	0.668753	0.011306	0.446413	0.00428
23587	ELP5	0.629112	0.0171738	0.419735	0.0407012	0.446305	0.00919
51635	DHRS7	0.654452	0.00419118	0.643207	0.00290625	0.445586	0.00787
4521	NUDT1	1.00861	0.000227	0.819396	0.000495969	0.445394	0.00675
161291	TMEM30B	0.941051	0.000568	0.806152	0.000895654	0.444368	0.0115
847	CAT	1.03003	0.000199	0.52752	0.00899298	0.443051	0.0321
51690	LSM7	0.456643	0.0305038	0.514777	0.0113457	0.442208	0.00382
51293	CD320	0.924393	0.00240709	0.801439	0.003624	0.440472	0.00496
23582	CCNDBP1	0.609902	0.00901982	1.31425	3.52167e-05	0.44031	0.0113
327	APEH	0.567834	0.030795	0.53481	0.0293635	0.439209	0.00835
1716	DGUOK	0.696075	0.00327812	1.30338	2.84092e-05	0.438394	0.00472
51069	MRPL2	0.881901	0.020476	0.963433	0.00856373	0.438135	0.00831
6749	SSRP1	0.715238	0.00412038	0.827023	0.000997219	0.437094	0.00835
38	ACAT1	0.791166	0.00108203	0.63869	0.00254889	0.436305	0.00382
23480	SEC61G	0.588883	0.0103771	0.534998	0.0119196	0.435317	0.00688
3028	HSD17B10	0.718017	0.00195186	0.433718	0.0234326	0.433789	0.00626
8678	BECN1	0.786126	0.008765	0.894326	0.00256717	0.433428	0.00586
5872	RAB13	0.556279	0.0104127	0.629441	0.00322821	0.431753	0.00588
221545	C6orf136	1.06396	0.0259751	0.944852	0.0329378	0.431188	0.0075
140823	ROMO1	0.491547	0.0196988	0.815587	0.00056923	0.43112	0.00729
56061	UBFD1	0.735373	0.00314604	1.02081	0.000207106	0.430677	0.0103
84284	NTPCR	1.11237	0.000433	0.764412	0.00290251	0.429348	0.0129
3958	LGALS3	0.77556	0.00222976	0.731344	0.00196843	0.429242	0.00937
3030	HADHA	0.67497	0.0101839	0.504969	0.0438178	0.428888	0.00431
55630	SLC39A4	0.808822	0.00533891	0.905052	0.00164866	0.428101	0.00479
79101	TAF1D	0.54805	0.0405435	0.661037	0.0109105	0.4256	0.0497
821	CANX	1.01299	0.00428479	0.994481	0.00299727	0.425593	0.00421
10897	YIF1A	0.465534	0.0476728	1.41564	3.17859e-05	0.425088	0.00758
56005	MYDGF	0.504153	0.048235	0.480821	0.0438268	0.422539	0.00884
4728	NDUFS8	0.493762	0.0135866	0.683111	0.00121226	0.422235	0.00803
10491	CRTAP	0.832479	0.0368385	0.862728	0.0220019	0.421935	0.00568
4502	MT2A	0.953119	0.00039	1.35059	1.966e-05	0.420967	0.0312
6138	RPL15	1.91884	0.000342	0.854157	0.000413863	0.418069	0.0129
389541	LAMTOR4	0.634784	0.00459378	0.680515	0.00184595	0.416693	0.0172
7453	WARS	0.406033	0.0460679	1.41549	5.03255e-05	0.41656	0.00535
1978	EIF4EBP1	0.519185	0.0195594	2.13206	1.42781e-06	0.416312	0.00459
64210	MMS19	0.632799	0.011718	1.01901	0.000359117	0.414398	0.00677
127544	RNF19B	1.67341	0.000747	1.80068	0.0012549	0.413838	0.0332
3364	HUS1	0.778365	0.0227454	1.46074	0.000295136	0.413802	0.0138
493856	CISD2	0.48286	0.0321278	0.681344	0.00315462	0.411944	0.0047
5134	PDCD2	1.21319	0.00111162	0.919102	0.00392908	0.411086	0.00635
30815	ST6GALNAC6	0.640105	0.0202128	0.848398	0.00259033	0.4104	0.0161
8798	DYRK4	0.626952	0.0313761	1.38573	0.000148658	0.409237	0.00529
9761	MLEC	1.15782	9.95e-05	1.5257	7.72896e-06	0.408746	0.007
399909	PCNX3	0.988039	0.00372105	0.744693	0.01262	0.40857	0.0227
9406	ZRANB2	0.638377	0.00880745	0.776013	0.00169607	0.408432	0.0316
55374	TMCO6	0.890723	0.00236065	1.24675	0.000141831	0.408308	0.0276
100128731	OST4	0.63714	0.00311528	0.619573	0.00228986	0.408017	0.00684
10061	ABCF2	1.57266	0.000818	4.14311	8.64457e-07	0.40655	0.0391
7126	TNFAIP1	0.793187	0.00401714	1.33542	7.29393e-05	0.405201	0.0183
152206	CCDC13	0.96583	0.00816217	1.33933	0.000638792	0.40408	0.0241
9581	PREPL	0.758309	0.00430818	1.10347	0.000214199	0.404	0.0163
11187	PKP3	0.712884	0.00210981	0.506148	0.0105259	0.403413	0.00899
10946	SF3A3	1.18059	0.00135015	1.19029	0.000746951	0.400303	0.019
57542	KLHL42	1.12529	0.000143	1.03739	0.00012523	0.399912	0.043
11017	SNRNP27	0.647714	0.00494567	1.12827	7.37791e-05	0.399541	0.00605
203069	R3HCC1	0.543641	0.0363878	0.907054	0.00127911	0.398945	0.0291
5954	RCN1	0.86405	0.000441	1.95829	1.16259e-06	0.39858	0.00641
374395	TMEM179B	0.730278	0.00624863	1.50132	3.11673e-05	0.393927	0.0109
130814	PQLC3	0.723892	0.0056188	1.13681	0.000172006	0.392406	0.0211
2512	FTL	0.957129	0.000367	0.792257	0.000731426	0.391167	0.00579
6923	ELOB	1.2265	0.000362	0.76959	0.000703617	0.389014	0.013
740	MRPL49	0.519971	0.0288024	0.633606	0.00676186	0.388791	0.0142
29094	LGALSL	0.722763	0.0117616	0.933287	0.00160805	0.386018	0.0498
27433	TOR2A	1.24378	0.00188512	1.28448	0.00091031	0.385771	0.0117
2495	FTH1	0.825871	0.0011916	1.07522	0.000110809	0.384896	0.00686
254359	ZDHHC24	0.833187	0.00288275	0.996873	0.000528936	0.384078	0.0203
29984	RHOD	0.75225	0.0030439	0.417049	0.0489786	0.381698	0.0145
6046	BRD2	0.734706	0.00203372	1.89737	2.1555e-06	0.380466	0.0157
7284	TUFM	0.666888	0.00734191	0.737907	0.00250839	0.380023	0.0118
1802	DPH2	0.669719	0.0218771	0.727334	0.00953597	0.378631	0.0105
57189	KIAA1147	0.492298	0.0497194	0.840657	0.00173932	0.378479	0.0133
10360	NPM3	0.563687	0.0133926	0.66708	0.00325057	0.37832	0.0132
4192	MDK	0.560672	0.0156983	0.70007	0.00278727	0.378139	0.0174
1376	CPT2	0.663434	0.00659918	0.584066	0.00901532	0.377725	0.0089
51447	IP6K2	1.52804	6.64e-05	2.5582	1.22105e-06	0.377489	0.0338
56900	TMEM167B	0.770571	0.00216049	1.38608	2.3587e-05	0.375856	0.0109
8763	CD164	0.454432	0.0393366	0.477877	0.0219535	0.375275	0.00822
91647	ATPAF2	1.0985	0.00179108	1.04706	0.00146172	0.373918	0.00864
51060	TXNDC12	0.677625	0.00404461	0.897712	0.000384781	0.373674	0.0104
6498	SKIL	0.821667	0.0181448	0.895925	0.00754162	0.371837	0.0131
522	ATP5PF	0.630599	0.00589695	0.390346	0.0489201	0.371157	0.00922
8479	HIRIP3	0.749232	0.0132398	0.834976	0.00466295	0.369571	0.0138
79036	KXD1	0.507242	0.0378703	0.484996	0.0336846	0.369452	0.0103
80745	THUMPD2	0.611232	0.0456278	1.91079	2.45475e-05	0.369259	0.012
8724	SNX3	0.493488	0.0163517	0.636157	0.0023962	0.368988	0.0271
55968	NSFL1C	0.875725	0.000773	1.02289	0.00782454	0.368753	0.00754
64172	OSGEPL1	0.586635	0.0299237	0.640212	0.0315431	0.367992	0.0263
29988	SLC2A8	0.685904	0.0181081	1.12673	0.000544982	0.367371	0.0322
404672	GTF2H5	0.751678	0.0147854	0.560941	0.0443667	0.366396	0.0184
28956	LAMTOR2	0.673402	0.0120367	0.873853	0.00160152	0.366354	0.0155
55556	ENOSF1	0.681822	0.00799025	0.701088	0.00437357	0.364598	0.0295
83658	DYNLRB1	0.555446	0.00965137	1.11107	6.33927e-05	0.364414	0.013
8839	WISP2	0.950678	0.000949	1.64514	1.2981e-05	0.363132	0.0204
25980	AAR2	0.624045	0.02035	1.18665	0.000229616	0.362314	0.0106
22949	PTGR1	1.21501	0.000184	0.789317	0.00177557	0.361492	0.0168
51398	WDR83OS	0.443171	0.0352593	0.678321	0.00213651	0.360999	0.0114
51548	SIRT6	0.57185	0.024136	0.935754	0.00204241	0.359921	0.0284
9810	RNF40	0.717564	0.0132893	1.66955	3.37622e-05	0.357808	0.0147
51004	COQ6	0.891829	0.00123424	0.849859	0.000996983	0.357524	0.0192
10450	PPIE	0.601898	0.036583	1.82811	2.15438e-05	0.357243	0.0122
2787	GNG5	0.514357	0.0220147	0.683245	0.00284354	0.357092	0.0187
27032	ATP2C1	0.701449	0.00898396	1.58037	2.57664e-05	0.356244	0.0197
114049	BUD23	0.52825	0.0289444	0.612527	0.00907704	0.355825	0.011
54858	PGPEP1	0.767529	0.0124093	0.796854	0.00665488	0.355551	0.0255
64792	IFT22	1.71518	0.000219	0.989695	0.00443586	0.355358	0.0156
51024	FIS1	0.557518	0.0317577	0.527948	0.0294901	0.354155	0.0213
84324	SARNP	0.673602	0.0244582	1.62735	5.7826e-05	0.353249	0.016
83549	UCK1	0.731449	0.00194916	0.391576	0.0418213	0.352402	0.0189
84265	POLR3GL	0.665504	0.0268984	1.82435	2.78936e-05	0.351914	0.0445
1476	CSTB	0.555231	0.00726861	0.741489	0.000720823	0.349805	0.0153
10467	ZNHIT1	0.887433	0.00151213	0.868607	0.0010259	0.347687	0.0145
59286	UBL5	0.771187	0.010108	0.891397	0.00272841	0.346442	0.0113
30	ACAA1	0.948891	0.00417314	1.04258	0.0014175	0.346064	0.0154
9827	RGP1	0.498465	0.0456716	0.974337	0.000614865	0.345823	0.015
51102	MECR	0.933149	0.0312752	1.43762	0.0017504	0.344401	0.0146
219738	FAM241B	0.773539	0.0128656	0.588631	0.0360834	0.344028	0.0352
212	ALAS2	1.799	3.68e-05	2.12099	6.0175e-06	0.342394	0.0257
5204	PFDN5	0.562322	0.00749213	0.564466	0.00471923	0.342079	0.0312
50717	DCAF8	1.38095	0.0021908	1.57781	0.000536145	0.339589	0.0315
2799	GNS	0.825835	0.00194454	0.605331	0.00815478	0.339148	0.0229
6748	SSR4	0.412873	0.0337	0.41593	0.0231064	0.336836	0.0184
116540	MRPL53	0.489894	0.0154768	0.640525	0.00204636	0.335754	0.0333
5660	PSAP	0.559862	0.0117616	0.422544	0.0348082	0.329906	0.0158
25996	REXO2	1.02454	0.00496435	0.692276	0.0019134	0.329714	0.018
6146	RPL22	0.784382	0.00161363	0.793509	0.000882345	0.328548	0.0167
8570	KHSRP	0.469943	0.0475947	0.920658	0.000646999	0.324017	0.0149
5441	POLR2L	0.465442	0.0212522	0.366627	0.0473594	0.322972	0.0247
10553	HTATIP2	1.32847	0.000363	0.930945	0.00217431	0.320871	0.0362
7009	TMBIM6	0.627287	0.00428234	0.80544	0.000510046	0.320633	0.0252
3417	IDH1	0.480466	0.0281064	0.921775	0.000340748	0.317219	0.0234
23450	SF3B3	1.32372	0.000217	0.983073	0.000862504	0.316352	0.0343
5621	PRNP	1.03322	0.00156925	1.94064	1.26853e-05	0.315733	0.0236
440574	MINOS1	0.700936	0.00479293	0.476697	0.0269463	0.313813	0.0337
80306	MED28	0.57914	0.0116852	1.15826	7.97607e-05	0.312456	0.0212
4758	NEU1	0.744023	0.0128105	1.12078	0.000633207	0.312438	0.0176
4726	NDUFS6	0.449486	0.0328827	0.430987	0.0287591	0.311544	0.0215
6652	SORD	0.970132	0.00417314	0.449263	0.023235	0.309811	0.0255
6284	S100A13	0.740105	0.00461442	0.56356	0.0144924	0.308904	0.0288
1603	DAD1	0.716772	0.00158788	0.464709	0.0135139	0.307967	0.0483
23585	TMEM50A	0.548549	0.00773571	0.772718	0.000538749	0.305403	0.0285
222962	SLC29A4	0.689969	0.0276145	0.827415	0.00706004	0.304918	0.0203
521	ATP5ME	0.712912	0.00266026	0.673645	0.00160664	0.303906	0.0238
64976	MRPL40	0.671124	0.00324382	1.02563	0.000110197	0.303674	0.0282
57111	RAB25	0.545183	0.0151517	0.976803	0.000235429	0.303251	0.0258
10920	COPS8	0.574634	0.0309846	1.00229	0.000499004	0.303191	0.0226
56915	EXOSC5	0.62151	0.00686985	0.639875	0.00368507	0.301365	0.0334
10007	GNPDA1	1.33506	0.000342	0.724448	0.00977876	0.30047	0.0288
79719	AAGAB	0.878699	0.00234131	0.733926	0.00444573	0.298492	0.0239
439	ASNA1	0.51254	0.0470061	0.798401	0.00286661	0.298339	0.044
1666	DECR1	0.705966	0.00335024	0.779641	0.00107776	0.297955	0.0289
56983	POGLUT1	1.02537	0.000336	0.709118	0.00295947	0.297744	0.0247
191	AHCY	0.476469	0.0202128	0.407867	0.0308525	0.28925	0.0496
27230	SERP1	0.599546	0.0192373	0.643622	0.00881946	0.287473	0.032
51124	IER3IP1	0.763113	0.020457	1.09644	0.00156934	0.287222	0.0421
10159	ATP6AP2	0.831619	0.00101928	0.39006	0.0476441	0.285779	0.0492
23324	MAN2B2	0.889881	0.00743473	0.778386	0.0105534	0.285629	0.0363
7295	TXN	0.762922	0.0048277	1.15216	0.000189626	0.277244	0.0447
55111	PLEKHJ1	0.739347	0.00430724	1.11088	0.000171805	0.276428	0.0488
79137	RETREG2	0.527926	0.028405	0.610671	0.00898573	0.275775	0.0356
4860	PNP	0.644766	0.0103153	0.795278	0.0018475	0.275659	0.0352
65265	C8orf33	1.14283	0.000523	1.45829	5.37512e-05	0.275381	0.0388
51013	EXOSC1	0.473927	0.0368128	1.08321	0.000148806	0.269568	0.0419
26519	TIMM10	0.53751	0.0353236	0.693865	0.00618288	0.26822	0.0427
79627	OGFRL1	1.55646	0.000742	1.58155	0.000367548	0.265971	0.0473
80273	GRPEL1	0.530224	0.0274956	1.06317	0.000242546	0.259785	0.0364
30851	TAX1BP3	0.715683	0.00306466	0.837424	0.000659272	0.258728	0.0491
81572	PDRG1	0.61151	0.0154183	1.54641	2.31329e-05	0.258722	0.0422
4708	NDUFB2	0.676953	0.00401692	0.710183	0.00183424	0.255011	0.0462

## Sheet: Common downregulated
		AF		ONC		RITA
Entrez ID	Gene Symbol	log2FC	FDR	log2FC	FDR	log2FC	FDR
64326	COP1	-1.25024	0.000159	-2.33252	1.43673e-06	-0.246996	0.0433
10248	POP7	-0.584204	0.00821513	-0.52538	0.0099604	-0.256745	0.0412
58155	PTBP2	-0.627137	0.048235	-1.24126	0.000615141	-0.257833	0.0467
167227	DCP2	-0.806481	0.00867772	-0.808714	0.000808878	-0.261199	0.0437
4331	MNAT1	-1.62667	0.000123	-1.43948	0.000139185	-0.267323	0.042
5889	RAD51C	-0.750006	0.00188087	-0.956799	0.000209484	-0.267601	0.0479
96459	FNIP1	-3.05102	1.56e-05	-3.35866	4.1995e-06	-0.269908	0.0422
9531	BAG3	-0.468284	0.0255521	-1.72044	3.8539e-06	-0.27426	0.0402
166647	ADGRA3	-0.806338	0.00222635	-1.4817	2.11216e-05	-0.282618	0.0484
8723	SNX4	-0.688661	0.017512	-0.610692	0.0225949	-0.284047	0.0394
9261	MAPKAPK2	-0.764778	0.00179348	-0.94036	0.0181699	-0.296809	0.0278
122786	FRMD6	-1.59566	1.43e-05	-2.08201	1.35228e-06	-0.296976	0.0319
10023	FRAT1	-0.593045	0.0496743	-0.777712	0.00880718	-0.298102	0.0464
8526	DGKE	-0.892835	0.0138543	-1.38116	0.000581986	-0.303134	0.0431
94081	SFXN1	-1.74088	3.03e-05	-3.81935	1.60295e-07	-0.306219	0.0205
54788	DNAJB12	-0.825158	0.0297588	-0.667568	0.0118551	-0.307962	0.0183
32	ACACB	-0.796689	0.0302949	-0.683508	0.0446685	-0.311379	0.0461
9063	PIAS2	-1.55053	0.001456	-0.848	0.000943745	-0.312449	0.0423
23312	DMXL2	-1.23628	0.00299851	-1.45077	0.000629177	-0.314423	0.0448
124411	ZNF720	-1.79279	0.000151	-1.96068	4.17128e-05	-0.317923	0.0167
10735	STAG2	-0.764527	0.00167087	-0.994809	0.000217793	-0.318122	0.0487
991	CDC20	-0.736256	0.00995184	-0.550482	0.0314223	-0.318834	0.0309
4682	NUBP1	-0.632619	0.0153478	-0.7067	0.00540568	-0.320763	0.0262
221150	SKA3	-0.585241	0.0357115	-0.547591	0.0351951	-0.321607	0.0323
79718	TBL1XR1	-0.69547	0.00415359	-0.738278	0.0017662	-0.322401	0.0178
9209	LRRFIP2	-1.24477	0.000845	-0.981405	0.00232656	-0.322645	0.0264
79954	NOL10	-0.683071	0.00958258	-1.3594	6.48197e-05	-0.324635	0.0243
54926	UBE2R2	-1.05516	0.000197	-0.810711	0.000622012	-0.32591	0.0152
55133	SRBD1	-1.1585	0.000501	-1.65137	2.41947e-05	-0.32805	0.0467
3161	HMMR	-1.38674	3.69e-05	-1.15699	6.07862e-05	-0.328752	0.0253
143458	LDLRAD3	-1.83621	0.00021	-1.67417	0.000200852	-0.331306	0.0164
2140	EYA3	-0.671163	0.0144165	-0.983812	0.000884601	-0.334926	0.0395
23078	VWA8	-0.930022	0.0445679	-1.92629	0.000398078	-0.335131	0.0183
84881	RPUSD4	-0.82245	0.0199192	-1.01852	0.00391803	-0.335136	0.0317
10254	STAM2	-1.31467	0.0049283	-1.49367	0.000214376	-0.339388	0.0356
79982	DNAJB14	-0.616183	0.0135132	-0.455051	0.0431335	-0.339682	0.0174
51379	CRLF3	-0.884172	0.00168901	-0.473834	0.0375034	-0.341865	0.0387
55069	TMEM248	-0.670408	0.00495215	-0.580642	0.00750444	-0.344073	0.0185
11335	CBX3	-0.948214	0.0242773	-1.70077	0.000441669	-0.34871	0.0161
55100	WDR70	-2.73067	9.3e-05	-4.11064	3.1095e-06	-0.349275	0.029
83737	ITCH	-1.66227	0.000317	-1.50645	0.000333943	-0.350937	0.0397
29102	DROSHA	-0.83246	0.0193065	-1.73692	0.000111898	-0.35424	0.0135
24144	TFIP11	-0.66424	0.0343813	-0.809489	0.00839837	-0.354812	0.0471
60313	GPBP1L1	-1.36215	0.000108	-0.490208	0.0324784	-0.355457	0.0234
5962	RDX	-0.451048	0.0272232	-0.717729	0.00963583	-0.356216	0.0273
8634	RTCA	-0.884402	0.00220778	-0.666385	0.00777778	-0.358407	0.0458
79139	DERL1	-0.404385	0.0489939	-0.564355	0.0235696	-0.359114	0.00949
6840	SVIL	-2.30895	6.69e-05	-2.7848	9.32539e-06	-0.359602	0.0184
202	CRYBG1	-1.23777	0.0100634	-2.53016	5.76747e-05	-0.361006	0.0374
152503	SH3D19	-0.927179	0.0226295	-2.12075	7.5028e-05	-0.36129	0.0338
23348	DOCK9	-1.51334	0.000153	-2.33926	4.38588e-06	-0.366779	0.0151
5533	PPP3CC	-1.16658	0.000731	-0.920371	0.00198162	-0.368747	0.0235
4886	NPY1R	-0.675606	0.00499805	-2.25183	1.16259e-06	-0.368877	0.0213
9364	RAB28	-1.91254	0.00034	-1.73085	4.87506e-05	-0.369052	0.0119
6259	RYK	-1.93719	4.3e-05	-1.90691	2.30634e-05	-0.372657	0.0187
79675	FASTKD1	-1.06889	0.00150277	-2.43937	3.4818e-06	-0.37317	0.0253
23165	NUP205	-0.609671	0.0211498	-1.29291	0.000112964	-0.373735	0.0105
79882	ZC3H14	-1.22759	0.00027	-1.30774	5.23505e-05	-0.37509	0.00714
2004	ELK3	-0.560328	0.0391528	-1.19854	0.0002596	-0.375853	0.016
7988	ZNF212	-0.741011	0.0250304	-0.819924	0.0100371	-0.3774	0.0225
23473	CAPN7	-0.693828	0.0186005	-0.995277	0.00140829	-0.377782	0.0136
25957	PNISR	-1.7966	0.000438	-2.02215	0.000103704	-0.378204	0.037
55023	PHIP	-0.879387	0.0266047	-1.4969	0.000719139	-0.378897	0.0255
91147	TMEM67	-0.813616	0.031398	-0.972906	0.0083965	-0.381777	0.0423
339500	ZNF678	-2.01477	0.00636777	-1.93402	0.00521631	-0.38424	0.00819
152189	CMTM8	-1.7045	5.32e-05	-1.41798	8.71902e-05	-0.384923	0.021
406	ARNTL	-1.31862	0.00793025	-0.541291	0.0315444	-0.38521	0.0258
9716	AQR	-0.558475	0.0340854	-1.54886	3.58363e-05	-0.385523	0.0114
115548	FCHO2	-3.46562	9.09e-06	-4.14159	1.46257e-06	-0.388612	0.0192
55756	INTS9	-1.37876	0.00871856	-2.16377	0.000295184	-0.390362	0.0253
58497	PRUNE1	-0.789524	0.00387306	-1.06929	0.00764955	-0.391063	0.00783
64786	TBC1D15	-0.734953	0.00226147	-1.33998	2.26576e-05	-0.391646	0.0378
145581	LRFN5	-1.34334	0.000845	-2.16414	1.83335e-05	-0.393109	0.0263
10048	RANBP9	-1.2531	0.000305	-1.8848	0.000119415	-0.393862	0.0124
1665	DHX15	-0.743043	0.00271023	-2.38195	8.29527e-07	-0.395118	0.0102
23598	PATZ1	-1.75416	8.58e-06	-0.74609	0.00127839	-0.39587	0.0358
2122	MECOM	-1.46364	0.000523	-1.61779	0.000359565	-0.395992	0.00617
23111	SPART	-0.90209	0.00391608	-2.0863	8.58626e-06	-0.39631	0.0298
8405	SPOP	-0.953206	0.00265124	-0.697074	0.0109163	-0.39729	0.0416
2099	ESR1	-2.67872	1.46e-06	-3.69932	1.16105e-07	-0.398077	0.00671
403341	ZBTB34	-1.60716	5.13e-05	-1.17554	0.00020357	-0.398371	0.0239
1488	CTBP2	-1.79525	1.15e-05	-1.50789	1.73336e-05	-0.398898	0.00919
8672	EIF4G3	-0.773206	0.0497583	-2.28663	4.10885e-05	-0.399687	0.014
55755	CDK5RAP2	-1.05579	0.020686	-0.804693	0.00112304	-0.401203	0.0082
10939	AFG3L2	-0.763023	0.00164166	-0.786157	0.000794798	-0.40122	0.0189
79086	SMIM7	-1.71932	0.000702	-1.99335	0.000138156	-0.403619	0.0114
80071	CCDC15	-1.26092	0.00107489	-1.65227	9.45504e-05	-0.404565	0.0425
5049	PAFAH1B2	-0.484647	0.0322705	-0.472579	0.0259666	-0.408333	0.0101
285489	DOK7	-1.47554	0.00073	-3.57572	1.22105e-06	-0.410796	0.0174
9859	CEP170	-2.59188	0.000633	-2.09349	0.00148229	-0.410808	0.00737
4628	MYH10	-0.943197	0.00232919	-2.46529	2.28888e-06	-0.412645	0.0105
9184	BUB3	-0.935957	0.00054	-1.40407	1.85473e-05	-0.413998	0.00786
54910	SEMA4C	-2.29308	2.28e-06	-2.6674	4.3984e-07	-0.414063	0.0204
57659	ZBTB4	-1.09462	0.00325913	-0.998934	0.00226907	-0.416435	0.0118
23517	MTREX	-0.759263	0.00660113	-1.72565	1.70884e-05	-0.416882	0.0126
5286	PIK3C2A	-0.982528	0.0183495	-0.942335	0.00507391	-0.41798	0.0155
5583	PRKCH	-2.08061	0.000971	-3.70804	1.09262e-05	-0.418695	0.0185
158	ADSL	-0.532042	0.0135132	-1.08791	0.000111898	-0.41874	0.00906
51678	MPP6	-1.37044	0.00241528	-0.88557	0.0196981	-0.42017	0.036
27130	INVS	-0.896474	0.0385102	-1.58569	0.000936371	-0.420694	0.0456
9650	MTFR1	-0.58796	0.0463875	-0.558334	0.0429304	-0.420707	0.0167
79657	RPAP3	-0.587699	0.0336675	-1.70767	2.56519e-05	-0.421383	0.00535
8239	USP9X	-0.485278	0.0243984	-1.44265	1.43927e-05	-0.425421	0.0173
84108	PCGF6	-1.37369	0.00315613	-1.28285	0.00299046	-0.425554	0.0267
4883	NPR3	-1.22263	0.00247762	-0.912806	0.00911879	-0.425755	0.0146
2963	GTF2F2	-0.766984	0.0268064	-0.742433	0.0221749	-0.426096	0.0184
55388	MCM10	-0.690756	0.0102673	-1.24762	0.000135845	-0.428551	0.00786
57545	CC2D2A	-1.13954	0.0155629	-1.45242	0.00242351	-0.429917	0.0244
5747	PTK2	-1.95839	0.00035	-2.85138	3.08509e-06	-0.432775	0.0154
22800	RRAS2	-2.40914	1.94e-05	-2.41936	9.24091e-06	-0.434755	0.00711
342371	ATXN1L	-1.04263	0.000612	-0.898069	0.000930609	-0.435084	0.0124
56984	PSMG2	-0.574491	0.00731308	-0.848896	0.000362004	-0.435236	0.00393
7182	NR2C2	-2.49604	1.29e-05	-2.04409	2.36733e-05	-0.435472	0.0459
79446	WDR25	-0.587446	0.0391528	-0.618959	0.0216005	-0.436183	0.0237
49855	SCAPER	-2.09254	0.00187484	-1.76395	0.00336516	-0.436592	0.00598
4651	MYO10	-0.722225	0.0429785	-0.982777	0.00583974	-0.437609	0.0107
11056	DDX52	-0.902282	0.040107	-1.0386	0.0213429	-0.437949	0.0158
10725	NFAT5	-1.76113	1.28e-05	-1.9073	3.78195e-06	-0.440439	0.00657
3308	HSPA4	-0.432934	0.0309996	-1.8112	7.00523e-06	-0.440573	0.00477
8452	CUL3	-1.03196	0.000311	-2.19272	0.000210821	-0.440658	0.00366
150962	PUS10	-1.11694	0.00234131	-1.48866	0.000284379	-0.44116	0.00879
4928	NUP98	-1.50463	0.00035	-1.89246	3.92838e-05	-0.441515	0.008
140838	NANP	-1.32946	0.000457	-0.8404	0.00512518	-0.441558	0.0497
8295	TRRAP	-0.827241	0.00834441	-1.89571	2.11891e-05	-0.442129	0.0119
130574	LYPD6	-1.15213	0.0375871	-1.23588	0.0188439	-0.442546	0.0466
25842	ASF1A	-0.612515	0.0206058	-1.00797	0.00278258	-0.445942	0.0363
23122	CLASP2	-1.565	0.000371	-1.43325	7.42606e-05	-0.446921	0.00859
22876	INPP5F	-0.865444	0.0087542	-1.23357	0.0005788	-0.447884	0.0389
9821	RB1CC1	-0.721492	0.038168	-1.16684	0.00167807	-0.450264	0.0174
1479	CSTF3	-0.589684	0.0461142	-1.35411	0.000595503	-0.450723	0.00537
54799	MBTD1	-1.52774	0.00206685	-1.75889	5.10102e-05	-0.451179	0.0229
7112	TMPO	-1.44567	0.00018	-2.66976	1.68524e-06	-0.451443	0.0104
79631	EFL1	-1.03275	0.00587473	-1.0853	0.00271968	-0.454263	0.00298
128061	C1orf131	-0.645114	0.00841794	-0.531955	0.0164484	-0.454354	0.00347
9937	DCLRE1A	-0.634242	0.0117853	-0.826728	0.00151419	-0.455106	0.0494
157697	ERICH1	-1.70795	0.00204079	-2.07824	0.000320621	-0.460884	0.00496
11137	PWP1	-0.406941	0.0488936	-0.564816	0.00618336	-0.461415	0.00394
53407	STX18	-1.83948	3.48e-05	-0.563049	0.0310791	-0.461464	0.0169
9686	VGLL4	-1.86298	9.47e-06	-0.722976	0.0026099	-0.464569	0.00491
22874	PLEKHA6	-0.949016	0.0128619	-1.00006	0.00632357	-0.464773	0.00461
57634	EP400	-1.51437	0.00637136	-1.31225	0.00377774	-0.464994	0.00214
114883	OSBPL9	-0.732695	0.00227399	-0.971859	0.000196958	-0.465165	0.00314
374986	MIGA1	-1.43883	0.000227	-1.52199	7.97607e-05	-0.465264	0.0484
55732	C1orf112	-0.680151	0.0136168	-1.66161	2.47305e-05	-0.465618	0.00833
5347	PLK1	-1.91003	5.77e-05	-1.06091	0.00153169	-0.466144	0.00986
55288	RHOT1	-1.0519	0.00022	-0.786004	0.000837355	-0.466453	0.0275
22875	ENPP4	-1.19919	0.00919822	-2.27823	8.44633e-05	-0.469233	0.0182
55789	DEPDC1B	-0.988112	0.00278574	-0.776789	0.00753931	-0.469367	0.0166
64215	DNAJC1	-0.91596	0.000909	-0.77123	0.0124494	-0.469749	0.00427
126282	TNFAIP8L1	-2.2282	0.00015	-1.81052	0.000318771	-0.469855	0.0393
23512	SUZ12	-0.883916	0.001654	-1.20908	0.000112034	-0.469912	0.00541
4781	NFIB	-1.19472	0.000144	-1.98916	2.60601e-06	-0.470525	0.00938
10690	FUT9	-2.41052	0.000162	-4.9283	8.78859e-07	-0.471473	0.0189
54856	GON4L	-1.82467	0.000133	-0.946713	0.00526438	-0.471514	0.00315
23335	WDR7	-2.25979	0.000646	-3.50027	1.80484e-05	-0.471872	0.027
8874	ARHGEF7	-2.92845	0.000319	-2.95242	0.000159947	-0.472551	0.0247
2776	GNAQ	-0.955528	0.000946	-2.80496	4.28055e-07	-0.47308	0.015
9093	DNAJA3	-0.814252	0.00109295	-0.632469	0.00329406	-0.473298	0.0133
57534	MIB1	-0.643901	0.0436442	-1.2674	0.000549736	-0.474332	0.0403
55112	WDR60	-1.83769	0.00036	-2.16828	6.26348e-05	-0.475212	0.00342
79161	TMEM243	-0.426573	0.042051	-0.828648	0.000565858	-0.475572	0.00441
51460	SFMBT1	-2.05068	0.000297	-1.98448	0.000196139	-0.475663	0.049
23158	TBC1D9	-2.02834	4.42e-06	-1.36081	2.6087e-05	-0.47583	0.00232
2932	GSK3B	-1.89028	6.31e-05	-1.99425	2.12975e-05	-0.476589	0.00701
4999	ORC2	-2.38402	3.31e-06	-1.47295	3.17859e-05	-0.477641	0.00227
23301	EHBP1	-2.02405	5.21e-05	-2.11292	1.85628e-05	-0.477956	0.00341
3009	HIST1H1B	-0.984292	0.00310677	-1.09096	0.000966831	-0.478434	0.0431
2000	ELF4	-0.669889	0.0268077	-1.29205	0.000307376	-0.478811	0.0147
23243	ANKRD28	-1.09447	0.00139619	-1.96035	1.54818e-05	-0.47901	0.00338
11193	WBP4	-2.61826	3.62e-05	-1.0621	0.00705102	-0.479597	0.00816
90025	UBE3D	-0.840782	0.0284083	-0.970283	0.00911299	-0.479719	0.0244
10240	MRPS31	-1.21787	0.000111	-1.62793	7.84059e-06	-0.481	0.00448
55818	KDM3A	-0.628723	0.0369544	-0.581129	0.0386498	-0.482601	0.0292
57007	ACKR3	-2.28388	1.57e-05	-2.97164	1.48406e-06	-0.483269	0.00332
143884	CWF19L2	-1.11666	0.0142428	-0.997049	0.017828	-0.48332	0.0343
51176	LEF1	-0.603024	0.0297928	-0.575653	0.0265142	-0.483538	0.00942
57228	SMAGP	-0.526274	0.0329105	-0.481746	0.0359468	-0.484528	0.0029
51762	RAB8B	-0.744418	0.017643	-1.36169	0.000249307	-0.484745	0.021
10600	USP16	-0.530882	0.021769	-0.764371	0.0016794	-0.485336	0.00359
10914	PAPOLA	-0.597625	0.0452011	-0.839992	0.00513921	-0.485459	0.0032
10299	MARCH6	-0.469341	0.0349702	-1.73926	9.88243e-05	-0.485648	0.0114
23200	ATP11B	-1.20618	0.00990527	-1.30159	0.00412392	-0.486094	0.0142
10733	PLK4	-2.30757	5.54e-06	-1.93311	7.84059e-06	-0.486484	0.0467
79064	TMEM223	-1.32225	0.000615	-1.35918	0.000277732	-0.486806	0.011
64151	NCAPG	-0.764596	0.00390404	-0.463136	0.0431255	-0.486952	0.00975
25896	INTS7	-0.843828	0.00272905	-0.795576	0.00241989	-0.486993	0.013
9320	TRIP12	-0.774446	0.00108002	-1.07018	6.65222e-05	-0.487195	0.0241
9700	ESPL1	-1.38441	0.000115	-1.81515	9.28132e-06	-0.487275	0.00429
9295	SRSF11	-1.80237	0.000205	-1.78745	0.000109718	-0.487819	0.0128
6421	SFPQ	-0.578496	0.00920772	-2.14539	1.8224e-06	-0.488982	0.00328
7003	TEAD1	-1.48462	2.81e-05	-2.56571	5.31989e-07	-0.489376	0.0243
29843	SENP1	-1.03839	0.00591735	-1.01747	0.00426552	-0.48988	0.00348
23528	ZNF281	-1.30702	0.000624	-1.15468	0.000801367	-0.489932	0.00719
4853	NOTCH2	-0.854069	0.00280091	-1.28603	6.273e-05	-0.49035	0.00228
388677	NOTCH2NLA	-0.823722	0.00185714	-2.66622	2.45475e-05	-0.49035	0.00228
151648	SGO1	-0.703322	0.0108498	-1.37261	8.58304e-05	-0.49272	0.005
91404	SESTD1	-1.00465	0.00269965	-1.53083	0.000119638	-0.49543	0.0335
55691	FRMD4A	-1.15418	0.00261471	-2.41576	1.08683e-05	-0.495719	0.0254
55728	N4BP2	-2.12908	0.00281755	-1.54826	0.00018852	-0.496628	0.0147
57223	PPP4R3B	-2.12142	0.000221	-2.14824	0.000102341	-0.496994	0.0233
3419	IDH3A	-0.386488	0.0498603	-0.928791	0.000169036	-0.497251	0.00245
25936	NSL1	-0.863905	0.00759899	-0.834498	0.00603569	-0.497854	0.0257
51182	HSPA14	-2.2414	0.000232	-2.55274	4.97417e-05	-0.49787	0.00188
2130	EWSR1	-1.06585	0.002573	-1.29132	0.000283741	-0.499074	0.00182
54704	PDP1	-1.27916	0.000733	-1.46874	0.00015468	-0.499874	0.0218
257019	FRMD3	-0.664472	0.0406408	-0.616867	0.0415562	-0.500831	0.0227
4144	MAT2A	-1.50587	1.5e-05	-2.50305	4.02421e-07	-0.501917	0.0136
57600	FNIP2	-1.38987	0.00354628	-1.74506	0.000479785	-0.501962	0.0198
80315	CPEB4	-1.01743	0.0118879	-1.47575	0.000747432	-0.502071	0.00733
6294	SAFB	-0.735535	0.00636244	-1.5576	2.59868e-05	-0.502081	0.00454
9489	PGS1	-0.880164	0.00156055	-1.62071	1.43992e-05	-0.503905	0.0379
29979	UBQLN1	-0.453075	0.0391998	-1.30872	3.35632e-05	-0.504005	0.00197
3760	KCNJ3	-1.02647	0.0353326	-0.958815	0.0350842	-0.504558	0.00391
6872	TAF1	-0.968539	0.0277804	-1.07634	0.0110385	-0.504614	0.0231
23331	TTC28	-1.08732	0.000649	-0.833117	0.0021372	-0.505588	0.00237
9738	CCP110	-0.758991	0.00537768	-0.708574	0.00519356	-0.506352	0.00875
51312	SLC25A37	-1.07045	0.0120835	-1.2255	0.0035779	-0.507402	0.0029
23244	PDS5A	-0.930819	0.00180071	-1.35521	8.08589e-05	-0.509999	0.0099
8776	MTMR1	-0.399284	0.0423796	-0.717607	0.000969993	-0.510946	0.00221
89958	SAPCD2	-0.601281	0.0083888	-0.756231	0.00128024	-0.511777	0.00949
54537	SHLD2	-0.541113	0.0118451	-0.996398	0.00014244	-0.511851	0.00155
84902	CEP89	-0.979684	0.000825	-0.874263	0.0010101	-0.512671	0.0236
10296	MAEA	-1.05731	0.000357	-1.1738	9.29217e-05	-0.513346	0.00428
54822	TRPM7	-1.03701	0.00308052	-2.14739	1.91108e-05	-0.514177	0.00466
54841	BIVM	-1.34938	0.00917902	-1.04952	0.0241331	-0.517084	0.0198
7187	TRAF3	-1.57343	0.00306012	-2.25688	0.000159876	-0.517329	0.00304
23431	AP4E1	-0.611024	0.011932	-1.77817	7.34301e-05	-0.51741	0.00261
27085	MTBP	-1.32415	0.00118637	-1.22208	0.00118685	-0.51748	0.00914
8633	UNC5C	-1.62443	0.000687	-1.37833	0.00115963	-0.51812	0.0187
5074	PAWR	-1.54599	0.000731	-0.905163	0.000621791	-0.51935	0.00129
3930	LBR	-0.677174	0.015367	-0.495655	0.049735	-0.520812	0.0229
56475	RPRM	-1.21834	0.00109295	-1.06793	0.00152229	-0.521098	0.00322
1894	ECT2	-0.990808	0.00104277	-1.88305	7.71075e-06	-0.52157	0.00315
1452	CSNK1A1	-0.701772	0.00327649	-0.563042	0.0215683	-0.524754	0.00513
9231	DLG5	-0.796193	0.00120366	-0.869225	0.000383621	-0.524778	0.00406
9989	PPP4R1	-0.79033	0.00181343	-1.24474	4.82069e-05	-0.52563	0.00211
337876	CHSY3	-1.03526	0.0197901	-0.914157	0.0260306	-0.525783	0.00955
55785	FGD6	-1.17189	0.000331	-1.04524	0.000393821	-0.52605	0.00621
84083	ZRANB3	-2.19864	0.000259	-2.83369	2.39813e-05	-0.527171	0.00566
57684	ZBTB26	-1.64882	0.0036573	-1.59245	0.00282015	-0.527391	0.00354
387119	CEP85L	-1.03432	0.0303934	-1.17531	0.0107966	-0.527629	0.0183
57187	THOC2	-0.527488	0.0197598	-1.39483	0.000157112	-0.529081	0.00134
23133	PHF8	-0.809829	0.024876	-0.661654	0.0464127	-0.529859	0.022
196527	ANO6	-0.81495	0.00473581	-1.99189	7.36824e-06	-0.530603	0.00291
23774	BRD1	-2.34483	1.67e-05	-1.04009	0.00143769	-0.531476	0.00294
23119	HIC2	-0.712429	0.015802	-1.49392	8.42804e-05	-0.532017	0.00215
286410	ATP11C	-0.900276	0.00876599	-2.87361	2.64525e-06	-0.532281	0.00776
9836	LCMT2	-1.08498	0.00992733	-1.1806	0.00392111	-0.532524	0.00213
63929	XPNPEP3	-1.0166	0.00667371	-1.02354	0.00411419	-0.532683	0.00142
158880	USP51	-1.07353	0.00712544	-0.78052	0.0269856	-0.533009	0.016
65125	WNK1	-0.779765	0.00159235	-0.657113	0.00285129	-0.533232	0.00106
54962	TIPIN	-0.99495	0.000778	-0.865859	0.00111907	-0.533278	0.0014
3688	ITGB1	-0.951093	0.00143299	-0.862243	0.00160987	-0.533926	0.0144
5558	PRIM2	-1.19686	0.000897	-1.95061	1.81344e-05	-0.53412	0.0121
2972	BRF1	-1.40809	0.002813	-0.937673	0.0191143	-0.534157	0.00151
57575	PCDH10	-3.24491	4.31e-06	-4.49836	3.47411e-07	-0.535197	0.00253
10409	BASP1	-0.935468	0.000459	-0.472762	0.018334	-0.535976	0.00237
80013	MINDY3	-0.496875	0.0345443	-0.646061	0.00575228	-0.538825	0.0036
23140	ZZEF1	-0.794636	0.0174964	-1.1026	0.0016209	-0.539275	0.0235
55226	NAT10	-0.596963	0.0438366	-0.977906	0.00188332	-0.539532	0.00113
9960	USP3	-0.755309	0.00152973	-2.03361	8.91388e-05	-0.539863	0.00157
5782	PTPN12	-1.52236	6.36e-05	-1.33504	7.47606e-05	-0.54193	0.00317
5465	PPARA	-0.788132	0.0141091	-1.1828	0.00073175	-0.54335	0.00353
4649	MYO9A	-1.08806	0.00381731	-1.38445	0.000475745	-0.543444	0.00378
9373	PLAA	-0.660754	0.0399427	-0.822154	0.00392545	-0.544191	0.00285
26503	SLC17A5	-1.65465	0.00327649	-1.9625	0.000226227	-0.544227	0.00772
23761	PISD	-1.0966	0.00183819	-0.970603	0.00242439	-0.545355	0.0119
9923	ZBTB40	-1.20006	0.00834441	-1.16529	0.00648045	-0.548217	0.00165
79670	TUT7	-2.04732	0.00170409	-2.75992	0.000128682	-0.548877	0.00282
8567	MADD	-0.694003	0.00708222	-0.762232	0.00253047	-0.549836	0.0136
440590	ZYG11A	-1.90403	0.000226	-1.7408	0.000213855	-0.551292	0.00969
8021	NUP214	-1.03077	0.0166691	-2.24535	6.98412e-05	-0.551508	0.0146
84722	PSRC1	-1.54991	0.000277	-1.11735	0.00137749	-0.551687	0.00221
1374	CPT1A	-0.594991	0.0404648	-2.20407	4.76365e-06	-0.551985	0.00113
26097	CHTOP	-0.847377	0.000853	-0.632933	0.00330382	-0.552476	0.00191
57082	KNL1	-1.52709	0.000326	-2.30999	1.07226e-05	-0.555516	0.00775
8087	FXR1	-0.884515	0.00117855	-0.805713	0.00453244	-0.555706	0.00179
996	CDC27	-1.5054	8.48e-05	-1.60928	2.6087e-05	-0.555817	0.00924
29117	BRD7	-0.573083	0.0143063	-0.946335	0.000386329	-0.556432	0.00297
23214	XPO6	-0.93839	0.00158561	-0.695383	0.0062735	-0.556826	0.0118
23350	U2SURP	-1.28733	5.32e-05	-3.14191	5.12697e-06	-0.557299	0.00134
6482	ST3GAL1	-1.03637	0.0171028	-0.813234	0.0400748	-0.559126	0.0168
9831	ZNF623	-1.39493	0.000862	-1.06863	0.00284837	-0.55937	0.00184
11214	AKAP13	-2.61519	2.48e-06	-3.16865	4.02421e-07	-0.559416	0.00129
4325	MMP16	-2.12397	0.000752	-2.64281	9.14705e-05	-0.559433	0.00254
9604	RNF14	-0.481475	0.046605	-1.2064	0.000112849	-0.560243	0.011
8527	DGKD	-0.586939	0.007325	-1.18692	4.20637e-05	-0.560404	0.000976
7150	TOP1	-0.529652	0.0108471	-0.898182	0.000225634	-0.561535	0.00406
123228	SENP8	-0.489092	0.0473848	-1.28844	8.32906e-05	-0.562035	0.0179
23683	PRKD3	-1.43842	0.000179	-1.56459	5.16289e-05	-0.562857	0.00306
8050	PDHX	-0.653661	0.00311455	-0.500327	0.00979149	-0.564836	0.00335
55253	TYW1	-1.85893	0.000162	-2.17884	2.82671e-05	-0.565356	0.00636
5194	PEX13	-0.709459	0.0103179	-0.715266	0.0344081	-0.565504	0.00218
55604	CARMIL1	-2.67023	3.9e-05	-3.85596	1.78716e-06	-0.565667	0.019
79726	WDR59	-1.59734	0.00813037	-2.14619	2.88825e-05	-0.566104	0.00125
54888	NSUN2	-0.54393	0.0145763	-1.05113	0.000132518	-0.568803	0.00175
55578	SUPT20H	-1.81299	8.9e-06	-0.445353	0.0320427	-0.56938	0.00556
4810	NHS	-0.581647	0.0252193	-0.665495	0.00835677	-0.569485	0.00933
6542	SLC7A2	-0.816293	0.00691358	-1.04359	0.000916577	-0.570433	0.00413
79886	CAAP1	-1.16287	0.000688	-0.56251	0.0309505	-0.570829	0.00144
374378	GALNT18	-1.40094	0.000299	-1.78329	3.06233e-05	-0.570902	0.0205
11169	WDHD1	-0.753145	0.0118493	-1.47793	9.19434e-05	-0.571353	0.0266
23272	FAM208A	-1.18028	0.000564	-1.48976	6.21533e-05	-0.572101	0.00179
22930	RAB3GAP1	-0.673015	0.00465856	-0.524366	0.0129058	-0.572651	0.00195
4602	MYB	-1.51368	9.13e-05	-2.23784	3.46053e-06	-0.575277	0.0106
8925	HERC1	-1.11045	0.00102121	-2.96706	9.48318e-07	-0.575787	0.0144
84068	SLC10A7	-1.53502	0.000555	-1.28291	0.00103001	-0.577599	0.00315
29946	SERTAD3	-1.43583	0.00353759	-0.902827	0.0307966	-0.578066	0.00231
83695	RHNO1	-0.886659	0.0068532	-0.776982	0.00962496	-0.579786	0.000761
4001	LMNB1	-0.500032	0.02185	-1.42518	1.64297e-05	-0.582554	0.0273
10274	STAG1	-1.63131	2.66e-05	-2.60106	7.63518e-07	-0.58312	0.00179
80821	DDHD1	-1.49473	0.000126	-2.22839	4.44835e-06	-0.583485	0.0125
25782	RAB3GAP2	-1.15869	0.00113505	-1.33522	0.000245976	-0.583746	0.00724
7004	TEAD4	-1.71573	6.15e-05	-1.34579	0.000153893	-0.586831	0.00186
10036	CHAF1A	-1.28006	0.000476	-1.85755	2.04787e-05	-0.588661	0.00221
84440	RAB11FIP4	-0.989337	0.0143678	-1.10458	0.00504355	-0.588839	0.00451
5530	PPP3CA	-0.839126	0.000726	-2.24038	6.93165e-07	-0.589319	0.00184
54464	XRN1	-1.21768	0.00518489	-2.96086	8.42932e-06	-0.591165	0.00649
7597	ZBTB25	-1.30161	0.000481	-1.10449	0.000811618	-0.592855	0.00334
79733	E2F8	-2.05038	0.000311	-1.8305	0.000363512	-0.593668	0.00295
79699	ZYG11B	-0.842522	0.00188123	-1.67568	1.05571e-05	-0.594425	0.000727
7813	EVI5	-0.989541	0.0310075	-1.21954	0.00692819	-0.595815	0.0143
8648	NCOA1	-1.15935	0.00398838	-3.49327	1.98725e-05	-0.599035	0.00265
55626	AMBRA1	-1.80199	0.000175	-1.65309	0.000160019	-0.599251	0.0151
5170	PDPK1	-1.23538	8e-05	-0.40134	0.0423142	-0.599559	0.0018
84955	NUDCD1	-0.806027	0.000823	-1.19753	3.06233e-05	-0.600015	0.00166
10171	RCL1	-1.99851	0.000167	-1.39263	0.00102048	-0.600226	0.00623
84162	KIAA1109	-1.09958	0.00508851	-1.40783	0.000635579	-0.600441	0.00833
7290	HIRA	-0.803408	0.011369	-1.04886	0.00143443	-0.600601	0.00271
23212	RRS1	-0.593999	0.00538425	-0.53308	0.0065884	-0.601206	0.000948
200845	KCTD6	-1.61941	0.00031	-1.13358	0.000336275	-0.60133	0.00164
4082	MARCKS	-1.04894	0.0433579	-1.44477	0.0054935	-0.601527	0.0237
55207	ARL8B	-0.715725	0.00259706	-1.03849	0.000122272	-0.602047	0.00167
79595	SAP130	-2.18529	0.000558	-2.78339	5.77956e-05	-0.602069	0.000641
6733	SRPK2	-1.83891	1.28e-05	-2.84822	1.64667e-06	-0.602248	0.0058
196441	ZFC3H1	-0.761369	0.00370936	-1.93077	4.44835e-06	-0.602373	0.00478
10949	HNRNPA0	-0.908952	0.000822	-1.12209	0.0001065	-0.605052	0.00105
10464	PIBF1	-2.27132	0.000748	-2.08367	0.000749121	-0.605448	0.00208
546	ATRX	-0.937775	0.00500247	-1.13018	0.000943745	-0.610592	0.000821
473	RERE	-1.15045	0.00833136	-0.876899	0.0244481	-0.611719	0.000615
3184	HNRNPD	-2.28228	0.000666	-2.14111	2.22021e-06	-0.612955	0.00114
89970	RSPRY1	-1.1568	0.00213731	-1.39957	0.000351586	-0.614684	0.00988
164	AP1G1	-0.787033	0.001456	-1.01819	0.000143327	-0.615076	0.000737
10538	BATF	-0.482446	0.0359681	-0.779215	0.0015538	-0.615116	0.000702
10098	TSPAN5	-0.734406	0.00405131	-1.3097	5.01431e-05	-0.617042	0.00859
112724	RDH13	-1.18699	0.0232803	-1.35879	0.00755274	-0.618834	0.00551
57460	PPM1H	-2.5848	1.46e-05	-3.84036	6.68248e-07	-0.619504	0.00188
51362	CDC40	-0.606629	0.0404744	-0.569078	0.0395138	-0.619742	0.000516
220929	ZNF438	-1.04273	0.00186936	-1.56618	6.81974e-05	-0.620188	0.011
83734	ATG10	-1.75648	0.000256	-1.76358	0.000128494	-0.621131	0.000463
5618	PRLR	-1.06522	0.00271812	-1.90762	3.10849e-05	-0.621228	0.00168
27436	EML4	-0.785557	0.046935	-1.14358	7.47606e-05	-0.621327	0.00174
29090	TIMM21	-0.467964	0.0317564	-0.515027	0.0135598	-0.623249	0.00179
10611	PDLIM5	-1.05638	0.00611589	-3.28468	2.10301e-06	-0.62385	0.0372
83891	SNX25	-0.924841	0.00667301	-1.28648	0.000492862	-0.624442	0.00833
2059	EPS8	-1.001	0.000498	-1.57745	1.25412e-05	-0.624738	0.00126
26019	UPF2	-0.79849	0.00421151	-0.804317	0.00250305	-0.624753	0.00243
79902	NUP85	-0.604837	0.0225959	-3.17215	4.45112e-07	-0.62538	0.000963
3660	IRF2	-0.742355	0.0460066	-0.781736	0.0260625	-0.625511	0.00708
23248	RPRD2	-1.75972	0.00015	-1.49852	0.000228792	-0.626655	0.00488
64216	TFB2M	-0.590049	0.0213024	-0.590595	0.0145956	-0.62717	0.00314
79811	SLTM	-0.996187	0.00240149	-1.51037	8.37908e-05	-0.627876	0.000673
51366	UBR5	-1.30464	0.000154	-2.18411	1.93471e-06	-0.628031	0.00111
55669	MFN1	-1.13303	0.000357	-2.19228	5.83307e-06	-0.629023	0.0018
79840	NHEJ1	-0.941577	0.0220223	-1.09678	0.00639668	-0.629423	0.00726
79648	MCPH1	-2.49753	0.00115608	-1.8642	0.0044812	-0.630139	0.00122
2187	FANCB	-1.33018	0.021231	-1.34028	0.0140303	-0.63019	0.00202
6907	TBL1X	-1.4088	8.14e-05	-1.40354	4.04356e-05	-0.63048	0.000557
23077	MYCBP2	-0.829904	0.0132764	-2.45633	6.85212e-06	-0.630556	0.00218
9014	TAF1B	-1.34581	3.85e-05	-1.11621	6.55042e-05	-0.631233	0.0118
9749	PHACTR2	-1.13009	0.00208105	-2.2715	1.09262e-05	-0.632788	0.00229
23635	SSBP2	-2.2298	3.62e-05	-3.49277	1.04939e-06	-0.632808	0.0334
55809	TRERF1	-2.06162	1.9e-05	-2.84286	1.24841e-06	-0.633787	0.00296
55833	UBAP2	-0.568	0.03045	-2.10274	4.6073e-06	-0.634171	0.00146
5108	PCM1	-1.41762	0.000134	-0.922232	0.00244354	-0.635233	0.0204
29068	ZBTB44	-1.18957	0.00232913	-1.30869	0.000740516	-0.63558	0.00477
25820	ARIH1	-1.59219	0.000296	-1.77109	7.55535e-05	-0.636152	0.00177
23580	CDC42EP4	-0.986376	0.000568	-0.898805	0.000588428	-0.636945	0.000577
26065	LSM14A	-0.898428	0.00201057	-0.726079	0.00126954	-0.638365	0.000536
5884	RAD17	-1.6344	0.000159	-0.607617	0.0333306	-0.639732	0.00205
5195	PEX14	-1.47034	7.09e-05	-2.00852	6.273e-05	-0.63991	0.012
140609	NEK7	-1.04419	0.000836	-1.67569	1.85473e-05	-0.640933	0.00181
9860	LRIG2	-1.555	0.00327768	-1.94114	0.000457318	-0.641082	0.00886
145508	CEP128	-1.48584	0.000264	-3.06359	1.24841e-06	-0.641363	0.00222
55422	ZNF331	-0.960369	0.0272597	-1.33854	0.00275696	-0.641679	0.0014
83605	CCM2	-0.788447	0.0073685	-1.18907	0.000317053	-0.641967	0.00284
5073	PARN	-0.970547	0.000744	-1.92956	4.10692e-06	-0.642347	0.0377
1112	FOXN3	-2.68405	2.55e-05	-3.549	2.10301e-06	-0.642905	0.000741
2033	EP300	-0.972238	0.013791	-1.30389	0.00150975	-0.643857	0.00187
10533	ATG7	-0.50369	0.0343138	-1.7758	7.40865e-06	-0.644149	0.00129
9882	TBC1D4	-0.887056	0.00317717	-1.55699	4.23946e-05	-0.644557	0.00611
7337	UBE3A	-1.6978	1.77e-05	-1.22212	7.73227e-05	-0.644753	0.000842
1063	CENPF	-1.46011	2.05e-05	-1.24247	2.92806e-05	-0.645123	0.000535
26059	ERC2	-1.26163	0.0190882	-1.46588	0.0054777	-0.645424	0.00047
7957	EPM2A	-0.700167	0.00551841	-0.614062	0.0077348	-0.645509	0.00584
7756	ZNF207	-0.565221	0.0105789	-0.695937	0.0172339	-0.645712	0.000848
84930	MASTL	-1.20984	0.00122594	-1.00399	0.00243886	-0.646408	0.00249
5431	POLR2B	-0.700393	0.00282784	-1.21042	4.12826e-05	-0.646628	0.000604
23131	GPATCH8	-2.41967	7.3e-05	-1.41282	0.00140529	-0.647714	0.00586
51360	MBTPS2	-0.76331	0.00210981	-1.02321	0.00016923	-0.647864	0.0029
9318	COPS2	-0.52055	0.0182108	-0.991047	0.036991	-0.648632	0.000901
26018	LRIG1	-1.4096	0.00056	-1.88977	4.07771e-05	-0.649204	0.000807
10165	SLC25A13	-0.541394	0.0306806	-2.64195	8.96885e-07	-0.649619	0.000548
6478	SIAH2	-1.5686	2.14e-05	-0.562988	0.00916541	-0.653289	0.00165
10973	ASCC3	-0.644571	0.0307489	-2.3002	5.83641e-06	-0.655425	0.00709
283149	BCL9L	-1.09639	0.000265	-0.566336	0.0102394	-0.655537	0.00302
9736	USP34	-1.07845	0.0011668	-2.0516	8.70424e-06	-0.65617	0.000737
55140	ELP3	-1.25414	0.0039585	-1.05478	0.00712497	-0.656311	0.00729
148423	C1orf52	-1.27723	0.000102	-0.579372	0.00906783	-0.656784	0.00163
9697	TRAM2	-0.995121	0.000487	-1.99911	2.60601e-06	-0.656915	0.000543
3099	HK2	-1.34782	0.000917	-1.77792	7.68254e-05	-0.657768	0.00227
92140	MTDH	-0.469351	0.0387374	-1.27602	4.95919e-05	-0.659289	0.00184
10128	LRPPRC	-1.50266	0.00598995	-1.62818	3.70886e-05	-0.660307	0.000716
7874	USP7	-0.558925	0.0140268	-1.37089	6.78598e-05	-0.66061	0.000369
3836	KPNA1	-0.868516	0.00792259	-1.48752	0.000142221	-0.660962	0.00148
339745	SPOPL	-1.6182	0.000353	-1.84449	7.71678e-05	-0.66299	0.000455
55614	KIF16B	-0.820509	0.00102915	-1.10103	0.000256759	-0.664478	0.011
317762	CCDC85C	-1.53133	0.000324	-1.25033	0.000703374	-0.665101	0.00193
55635	DEPDC1	-1.16424	7.93e-05	-2.22836	0.000579942	-0.665829	0.0106
1826	DSCAM	-1.81815	0.000317	-2.5845	5.90337e-05	-0.666286	0.00335
149420	PDIK1L	-1.06624	0.00776863	-1.16392	0.00290532	-0.66771	0.0014
1662	DDX10	-2.94444	1.09e-06	-2.28806	1.47559e-06	-0.668016	0.00114
5822	PWP2	-0.835256	0.00104358	-1.22894	4.20911e-05	-0.668627	0.000468
51523	CXXC5	-1.56508	5.74e-05	-2.59543	1.24281e-06	-0.669231	0.000416
79842	ZBTB3	-0.789043	0.0090442	-0.882133	0.0195568	-0.66935	0.032
9759	HDAC4	-1.10027	0.00163123	-1.03793	0.00142212	-0.669964	0.0386
10051	SMC4	-0.773808	0.00189234	-1.58055	8.97819e-06	-0.671049	0.000346
51530	ZC3HC1	-0.841411	0.00338687	-0.726724	0.00522151	-0.672351	0.00044
55778	ZNF839	-1.23256	0.00344504	-1.45996	0.000691777	-0.672496	0.0019
55589	BMP2K	-0.68172	0.0280502	-1.43294	0.000179356	-0.673273	0.0268
5770	PTPN1	-0.774618	0.00149997	-0.432161	0.0281123	-0.673695	0.000583
7486	WRN	-1.08417	0.0243064	-1.50416	0.00245181	-0.673903	0.00622
9833	MELK	-0.989697	0.00074	-1.67654	1.13824e-05	-0.674936	0.00268
23392	ECPAS	-0.866088	0.0204445	-1.29852	0.00118569	-0.675913	0.00379
51143	DYNC1LI1	-1.09013	0.000714	-0.592106	0.0177367	-0.676244	0.00152
11073	TOPBP1	-1.42239	0.000239	-2.45074	3.39513e-06	-0.67687	0.000397
126231	ZNF573	-1.42823	0.0220223	-1.47716	0.0126769	-0.677693	0.00957
2530	FUT8	-1.54605	4.48e-05	-3.01241	4.02421e-07	-0.678293	0.00224
23397	NCAPH	-1.4523	0.00176394	-2.03785	0.000100953	-0.678612	0.00033
11275	KLHL2	-0.741886	0.00349926	-1.12846	0.000123735	-0.679456	0.0014
63892	THADA	-1.75232	0.000754	-2.56678	3.05981e-05	-0.679928	0.00118
10265	IRX5	-1.36556	6.18e-05	-1.59284	1.07789e-05	-0.681069	0.00178
114991	ZNF618	-1.20995	0.000695	-1.40404	0.000135668	-0.681352	0.00717
7750	ZMYM2	-1.78081	1.44e-05	-1.4819	2.35637e-05	-0.6822	0.00374
9262	STK17B	-1.31412	0.00012	-0.608396	0.00939777	-0.683778	0.00241
9169	SCAF11	-1.38169	0.000217	-1.41125	9.51933e-05	-0.684268	0.000322
114932	MRFAP1L1	-0.727806	0.00286505	-0.967455	0.000252386	-0.68576	0.0015
133522	PPARGC1B	-1.55312	0.00161637	-2.45651	4.10885e-05	-0.68709	0.00127
5927	KDM5A	-1.66607	0.000224	-1.9185	4.41104e-05	-0.68716	0.000896
80818	ZNF436	-0.575708	0.0284518	-0.689242	0.00737652	-0.687574	0.000984
27000	DNAJC2	-0.903836	0.000395	-0.599976	0.00331636	-0.688208	0.00139
197131	UBR1	-1.7366	0.000239	-2.56098	9.21213e-06	-0.688468	0.00192
163589	TDRD5	-1.79482	0.00113182	-2.17497	0.000172505	-0.688609	0.00594
6683	SPAST	-1.02865	0.00195186	-1.90923	1.73005e-05	-0.690469	0.000489
1654	DDX3X	-0.992	0.000332	-1.99583	3.1422e-06	-0.690944	0.000756
9031	BAZ1B	-1.19779	0.000165	-0.634259	0.00579657	-0.691927	0.000345
51720	UIMC1	-2.06021	2.87e-06	-1.37282	1.65266e-05	-0.693169	0.0011
1386	ATF2	-1.21851	0.000413	-1.50197	0.000492384	-0.694784	0.00133
9748	SLK	-1.01804	0.0162417	-1.17604	0.00471757	-0.695355	0.000874
10260	DENND4A	-0.898639	0.0368844	-0.900464	0.0261223	-0.696901	0.00202
23033	DOP1A	-2.02891	0.00078	-1.37614	0.00545445	-0.698129	0.00101
9870	AREL1	-0.707581	0.0177973	-0.788722	0.00649551	-0.699493	0.00037
51496	CTDSPL2	-1.40247	0.000103	-1.0964	0.000271871	-0.700057	0.00486
23678	SGK3	-1.85422	0.00137707	-2.28055	0.00019201	-0.700427	0.00113
5469	MED1	-1.21244	0.00146315	-1.15958	7.73227e-05	-0.700581	0.000892
55622	TTC27	-0.888398	0.0056635	-2.7216	2.12464e-06	-0.700906	0.00051
51341	ZBTB7A	-1.63127	7.85e-05	-1.44371	0.00119134	-0.70178	0.00675
54707	GPN2	-1.12467	0.00136197	-1.873	2.41915e-05	-0.702132	0.000515
5205	ATP8B1	-1.38185	0.00115805	-3.55452	2.3851e-06	-0.702703	0.000703
154810	AMOTL1	-0.939202	0.0027479	-1.12246	0.000503072	-0.703232	0.00679
91120	ZNF682	-1.88213	0.000144	-1.32081	0.000836487	-0.703709	0.0254
84937	ZNRF1	-1.23485	0.000141	-1.67319	9.373e-06	-0.706492	0.00322
147007	TMEM199	-0.726891	0.0183876	-0.871383	0.00435222	-0.706649	0.000915
23527	ACAP2	-2.18684	0.000198	-2.29799	5.61902e-06	-0.706805	0.00148
26033	ATRNL1	-1.15666	0.00417545	-1.28304	0.00133352	-0.707785	0.00105
667	DST	-0.861851	0.00119683	-2.14894	1.60966e-06	-0.71003	0.000951
51058	ZNF691	-0.74276	0.0391444	-0.728303	0.0308548	-0.710059	0.00154
84725	PLEKHA8	-2.34827	1.13e-05	-2.50661	3.67111e-06	-0.710228	0.00356
23144	ZC3H3	-1.12569	0.0154789	-0.893216	0.0348082	-0.710676	0.0145
200765	TIGD1	-1.0294	0.00458775	-1.54263	0.000187938	-0.712548	0.00103
9218	VAPA	-0.582041	0.0254229	-1.37065	7.21886e-05	-0.712696	0.000421
57209	ZNF248	-1.30978	0.00698317	-1.42331	0.00266364	-0.712765	0.000451
1741	DLG3	-1.78155	0.000212	-1.40042	0.000573223	-0.715141	0.000349
81617	CAB39L	-0.841186	0.001899	-1.50683	2.12193e-05	-0.71552	0.0164
81627	TRMT1L	-0.598799	0.0183958	-1.36713	5.7826e-05	-0.716038	0.00174
219844	HYLS1	-2.1419	2.24e-05	-1.00658	0.00183054	-0.71667	0.000334
56288	PARD3	-1.789	6.05e-05	-2.50325	4.96798e-06	-0.717591	0.0022
1739	DLG1	-2.45114	0.00014	-2.98613	1.68167e-06	-0.71791	0.000763
285315	C3orf33	-0.974197	0.00235248	-0.56086	0.0342056	-0.718012	0.00651
170394	PWWP2B	-1.21177	0.00054	-1.1068	0.000551538	-0.718663	0.000347
26130	GAPVD1	-1.30019	0.000212	-1.97296	6.81369e-06	-0.719539	0.000294
3764	KCNJ8	-1.33281	0.0156547	-1.08436	0.0103513	-0.720146	0.000705
6549	SLC9A2	-1.16345	0.0418003	-1.52727	0.00695454	-0.72057	0.00198
26267	FBXO10	-1.17836	0.000622	-1.08717	0.000593326	-0.720701	0.00458
9331	B4GALT6	-2.37836	0.00108968	-2.94502	0.000141862	-0.722216	0.00349
10420	TESK2	-1.22322	0.00636395	-1.50682	0.0010603	-0.722813	0.000274
22990	PCNX1	-1.41441	0.00129286	-1.71321	0.000199725	-0.724414	0.00104
6728	SRP19	-0.802612	0.0012264	-0.949176	0.000223008	-0.724604	0.00071
159195	USP54	-1.66019	0.00524185	-1.63337	0.00367243	-0.725337	0.0105
6426	SRSF1	-1.1246	0.000857	-2.39304	3.08509e-06	-0.726097	0.00664
4155	MBP	-1.40643	0.00882048	-1.13596	0.019166	-0.727081	0.00242
340481	ZDHHC21	-0.545434	0.0487606	-2.09015	6.57828e-05	-0.727896	0.00579
9497	SLC4A7	-2.10832	5.12e-05	-3.05011	2.23496e-06	-0.72866	0.00607
55689	YEATS2	-0.989991	0.0192968	-0.785368	0.0422686	-0.729481	0.00834
57685	CACHD1	-1.31334	0.00338067	-1.49167	0.000902866	-0.729656	0.0102
23161	SNX13	-1.5827	0.000235	-1.86715	3.94616e-05	-0.729901	0.00108
7594	ZNF43	-1.09605	0.000814	-1.34899	0.000107338	-0.730424	0.00217
5983	RFC3	-0.760887	0.00245904	-1.90703	3.76672e-06	-0.731723	0.0005
55676	SLC30A6	-0.527496	0.0439193	-0.915905	0.00129564	-0.73181	0.00789
80829	ZFP91	-0.765837	0.00350492	-0.656955	0.00562098	-0.73441	0.000501
8504	PEX3	-0.553283	0.0311503	-2.14132	3.63807e-06	-0.735389	0.0212
79959	CEP76	-1.3397	0.000437	-1.09508	0.000949875	-0.735492	0.000626
57522	SRGAP1	-2.69973	1.6e-05	-3.2094	2.63658e-06	-0.736822	0.00758
5814	PURB	-0.918964	0.0144293	-0.783084	0.00469784	-0.737086	0.00179
10507	SEMA4D	-1.52907	0.00105116	-1.54822	0.000554295	-0.737596	0.00941
29028	ATAD2	-1.29424	0.000162	-1.19699	0.000140053	-0.739365	0.00023
3621	ING1	-1.52063	0.000205	-1.11542	0.000670991	-0.740439	0.00812
79813	EHMT1	-2.01118	0.000112	-3.01941	1.73435e-06	-0.740498	0.000573
9252	RPS6KA5	-2.51361	3.93e-06	-3.87709	1.82072e-07	-0.740911	0.00107
10413	YAP1	-1.35389	0.00013	-1.57693	2.31561e-05	-0.741134	0.000432
23007	PLCH1	-2.83314	3.21e-05	-2.96159	1.17155e-05	-0.741472	0.0111
4149	MAX	-1.17764	0.000151	-0.753614	0.00523954	-0.741669	0.000253
23387	SIK3	-2.15385	0.000159	-2.44742	3.43095e-05	-0.743454	0.0119
8089	YEATS4	-2.12132	2.14e-05	-1.88713	2.27479e-05	-0.745558	0.00171
3093	UBE2K	-0.657548	0.013791	-1.2485	0.000139185	-0.746591	0.000496
65094	JMJD4	-1.11524	0.00422909	-1.17774	0.00186219	-0.746664	0.00346
7082	TJP1	-0.875081	0.00260213	-0.542104	0.0159149	-0.747146	0.000294
79577	CDC73	-0.885438	0.000977	-0.770927	0.00142289	-0.747265	0.000635
10512	SEMA3C	-0.646589	0.00431538	-1.35344	1.83003e-05	-0.747618	0.000397
51076	CUTC	-1.27348	0.000209	-0.62033	0.0115077	-0.747648	0.000335
55247	NEIL3	-2.9237	1.52e-05	-1.57908	0.000485213	-0.753387	0.0145
9869	SETDB1	-1.73654	0.000196	-1.99504	3.89855e-05	-0.753435	0.000689
9474	ATG5	-1.09415	0.0007	-0.821152	0.00260584	-0.755176	0.00246
8394	PIP5K1A	-1.74979	1.17e-05	-0.503662	0.0337016	-0.755267	0.0149
644096	SDHAF1	-0.807458	0.0196934	-0.766938	0.0178104	-0.758515	0.000702
8871	SYNJ2	-1.36287	0.0114589	-1.92731	0.000850518	-0.758525	0.00178
7026	NR2F2	-1.27234	0.000145	-2.30526	1.56546e-06	-0.759664	0.000924
84318	CCDC77	-0.580902	0.0126428	-0.959081	0.000330842	-0.760684	0.00362
5451	POU2F1	-2.75314	7.08e-05	-2.01743	0.000288296	-0.760868	0.0011
4591	TRIM37	-0.488017	0.0163379	-1.27846	0.000106235	-0.761422	0.00103
7746	ZSCAN9	-0.985052	0.0477405	-1.03413	0.0275497	-0.762401	0.00243
54462	CCSER2	-1.69816	2.58e-05	-1.0161	0.00118835	-0.76257	0.00158
80005	DOCK5	-0.550464	0.0490525	-0.783501	0.00532422	-0.763475	0.000416
51621	KLF13	-1.14557	0.0178851	-1.12615	0.0134039	-0.76406	0.0155
8819	SAP30	-1.97257	0.000165	-1.55819	0.000427214	-0.768033	0.00606
7181	NR2C1	-1.50493	0.0032164	-1.85118	0.000496123	-0.768473	0.00372
222255	ATXN7L1	-1.5844	0.000639	-1.79885	0.00014462	-0.768697	0.00155
2803	GOLGA4	-0.781433	0.00515113	-1.45127	5.01431e-05	-0.769098	0.000255
85453	TSPYL5	-0.556822	0.0118605	-0.510589	0.0129524	-0.769288	0.00038
153830	RNF145	-1.22285	0.00147616	-2.04241	2.57136e-05	-0.769781	0.00109
10492	SYNCRIP	-1.41805	0.00898504	-4.00457	5.83307e-06	-0.77009	0.000338
2976	GTF3C2	-0.74656	0.00442574	-1.55128	1.96856e-05	-0.771926	0.000247
64062	RBM26	-1.01808	0.00500291	-1.03383	0.00376486	-0.771962	0.000872
6760	SS18	-0.702013	0.00455764	-0.70912	0.00266699	-0.772431	0.000291
55761	TTC17	-1.45361	0.00933426	-2.17896	0.00044187	-0.772543	0.00162
1763	DNA2	-1.15684	0.00184589	-2.09885	1.88843e-05	-0.773457	0.000606
7153	TOP2A	-1.1149	0.000471	-1.47862	3.70886e-05	-0.773836	0.000392
701	BUB1B	-1.91598	0.000172	-2.39901	1.92395e-05	-0.774079	0.000343
55131	RBM28	-0.89513	0.00430505	-0.631867	0.0203838	-0.775841	0.000422
25831	HECTD1	-1.0675	0.000269	-1.4423	1.83335e-05	-0.777836	0.000211
5893	RAD52	-0.841797	0.0454214	-0.68448	0.00729392	-0.779555	0.000272
219771	CCNY	-1.50341	0.00912048	-1.06121	0.00055504	-0.78025	0.00042
11191	PTENP1	-0.761776	0.0312989	-0.797471	0.0174712	-0.781136	0.000232
137695	TMEM68	-1.90242	0.000128	-1.76212	0.000105961	-0.781281	0.000934
56243	KIAA1217	-0.794474	0.0459068	-0.874523	0.0207757	-0.782729	0.000526
6120	RPE	-0.562672	0.0171204	-0.89667	0.000622539	-0.782738	0.00151
5529	PPP2R5E	-1.09369	0.000128	-1.3163	1.82338e-05	-0.78342	0.000307
128710	SLX4IP	-1.63158	2.31e-05	-0.705695	0.00318184	-0.783446	0.0385
153364	MBLAC2	-1.34805	0.00106152	-1.61045	0.000176808	-0.783681	0.00238
9710	KIAA0355	-1.99595	0.000172	-1.63366	0.000351536	-0.786362	0.00208
2107	ETF1	-0.68145	0.00278235	-0.588671	0.00428257	-0.788954	0.000183
55654	TMEM127	-0.573536	0.0216652	-1.56624	2.13125e-05	-0.788984	0.000152
8453	CUL2	-0.830195	0.00247396	-1.75138	9.50535e-06	-0.789006	0.00168
84976	DISP1	-0.726232	0.0116076	-0.914169	0.0231064	-0.789608	0.000729
286827	TRIM59	-1.94213	6.68e-05	-0.93717	0.00430552	-0.790027	0.0286
117178	SSX2IP	-1.46145	0.00202459	-2.29453	5.5464e-05	-0.790788	0.00063
23137	SMC5	-0.726232	0.0451407	-1.41724	0.000610884	-0.791292	0.000241
54737	MPHOSPH8	-1.51787	0.000134	-2.05111	9.02005e-06	-0.791482	0.00103
54815	GATAD2A	-0.886211	0.00496228	-1.25157	0.00031458	-0.791701	0.000615
84181	CHD6	-2.52068	1.86e-05	-2.77156	4.86669e-06	-0.792114	0.00375
9100	USP10	-0.989578	0.000788	-1.3186	0.000747359	-0.796201	0.000268
4678	NASP	-1.61462	0.00589871	-2.79773	3.47411e-07	-0.796221	0.000852
51719	CAB39	-0.736265	0.0039953	-0.709649	0.00311922	-0.796533	0.00196
55182	RNF220	-1.02973	0.0260201	-0.89247	0.0370626	-0.797322	0.0325
11342	RNF13	-1.17234	0.000163	-1.40609	2.42196e-05	-0.798055	0.000813
54629	MINDY2	-0.948483	0.0421777	-1.39111	0.00359681	-0.799223	0.000413
29966	STRN3	-3.34453	2.6e-06	-2.33402	1.03322e-05	-0.800278	0.0149
389677	RBM12B	-1.93456	1.26e-05	-1.16292	0.000186022	-0.804116	0.000218
23002	DAAM1	-1.18734	0.000302	-1.40065	5.21044e-05	-0.806918	0.000271
79598	CEP97	-1.47595	0.00146524	-1.65863	0.000386329	-0.807813	0.0018
56852	RAD18	-1.79041	0.00189439	-1.33692	0.00713349	-0.808706	0.000626
9202	ZMYM4	-1.57283	2.14e-05	-1.74	5.31541e-06	-0.808973	0.0112
6789	STK4	-0.791742	0.00258972	-0.495617	0.0244429	-0.809319	0.000194
387263	C6orf120	-0.848924	0.00319571	-0.987999	0.000719108	-0.810099	0.00821
9053	MAP7	-1.26319	0.00190336	-1.64829	0.000182542	-0.81135	0.000164
10495	ENOX2	-1.66928	0.00134543	-2.09948	0.000160493	-0.811362	0.00016
6651	SON	-1.33703	0.000184	-1.51376	4.02656e-05	-0.811802	0.00044
9654	TTLL4	-1.1596	0.0301749	-1.25253	0.0141709	-0.813994	0.000221
4897	NRCAM	-1.18384	0.00133551	-1.78189	4.73602e-05	-0.815441	0.00019
9525	VPS4B	-0.636658	0.0335596	-1.02078	0.00148077	-0.818367	0.000482
80764	THAP7	-1.02223	0.00063	-0.664956	0.00574528	-0.818778	0.000245
7175	TPR	-0.858425	0.000778	-1.53524	5.4954e-05	-0.819033	0.000233
4773	NFATC2	-2.41248	2.6e-05	-2.47719	1.06661e-05	-0.82067	0.00468
9444	QKI	-1.44039	0.000135	-1.70131	2.18068e-05	-0.821223	0.000672
285527	FRYL	-2.04101	0.000203	-3.13879	1.35355e-05	-0.82237	0.00172
1837	DTNA	-1.7862	0.000422	-1.90783	0.000144309	-0.823816	0.000904
6670	SP3	-1.0937	0.00109295	-0.738909	0.0185876	-0.824359	0.000321
51773	RSF1	-1.27022	0.000125	-2.19329	0.000422057	-0.824417	0.000132
51194	IPO11	-0.71878	0.0207463	-3.10768	1.1405e-06	-0.825135	0.00366
4293	MAP3K9	-2.89291	0.000102	-2.35664	0.000200204	-0.825296	0.00115
9815	GIT2	-1.61414	7.81e-05	-0.839926	0.00233377	-0.825838	0.0012
400629	TEX19	-1.2456	0.0253796	-1.80249	0.00198235	-0.826714	0.0128
5501	PPP1CC	-0.653388	0.00376788	-1.07731	7.83583e-05	-0.827345	0.000116
6093	ROCK1	-1.19196	0.000314	-1.47476	6.45348e-05	-0.828	0.00024
64110	MAGEF1	-0.467953	0.021278	-1.16197	3.94126e-05	-0.828237	0.000225
23435	TARDBP	-0.584087	0.00685746	-2.13005	9.42058e-07	-0.82927	0.000368
2181	ACSL3	-0.917899	0.000476	-1.75292	3.4818e-06	-0.8293	0.000231
84186	ZCCHC7	-2.61707	3.93e-06	-1.81359	0.00265115	-0.832478	0.00189
51528	JKAMP	-0.749179	0.00390097	-1.85752	1.18836e-05	-0.832874	0.000154
8266	UBL4A	-1.53199	0.000137	-1.81715	2.16814e-05	-0.833187	0.000255
9694	EMC2	-0.810803	0.00122491	-0.80222	0.000765515	-0.833426	0.00031
9475	ROCK2	-1.61179	0.00220306	-2.76029	3.36656e-05	-0.83366	0.000262
55605	KIF21A	-2.05781	0.000127	-2.53822	1.55787e-05	-0.833699	0.000145
7020	TFAP2A	-0.620496	0.0196079	-1.75086	1.52853e-05	-0.834068	0.00053
56980	PRDM10	-1.80082	0.000106	-1.76183	6.03112e-05	-0.835127	0.000167
54556	ING3	-1.71681	6.69e-05	-1.54901	0.000378562	-0.835137	0.00293
83752	LONP2	-0.802304	0.00597959	-1.43723	0.000173596	-0.837764	0.000293
2956	MSH6	-0.87807	0.000956	-3.08193	3.47411e-07	-0.837825	0.000134
84750	FUT10	-1.37876	0.000417	-1.35927	0.000249	-0.837921	0.000145
51514	DTL	-1.45117	0.000114	-1.90048	9.28132e-06	-0.838171	0.00048
6867	TACC1	-0.774154	0.0288249	-3.02499	1.62823e-05	-0.839143	0.000208
23567	ZNF346	-1.21338	0.00182568	-1.24395	0.000922532	-0.840694	0.00038
201627	DENND6A	-1.35136	0.00313565	-2.81364	1.34242e-05	-0.841673	0.00243
5412	UBL3	-1.05005	0.0017447	-2.58748	2.51955e-06	-0.84263	0.000141
23329	TBC1D30	-3.60019	2.92e-05	-3.69574	1.20109e-05	-0.842687	0.00169
9933	PUM3	-1.10341	0.000216	-0.434054	0.0354971	-0.843029	0.000337
92558	BICDL1	-1.49585	0.000648	-2.96698	3.67995e-06	-0.843634	0.000218
55844	PPP2R2D	-1.34108	0.00037	-1.04571	0.0011026	-0.844906	0.000551
84216	TMEM117	-1.91679	0.000218	-2.74003	1.01516e-05	-0.845779	0.0055
6996	TDG	-0.852638	0.000692	-1.21595	3.36046e-05	-0.846056	0.00037
134957	STXBP5	-0.678581	0.0279007	-1.10331	0.00104394	-0.846177	0.000524
51651	PTRH2	-0.581116	0.0194443	-0.957251	0.000587023	-0.846244	0.000149
90417	KNSTRN	-1.73285	8.61e-05	-1.04489	0.00133259	-0.846413	0.000227
64328	XPO4	-0.870976	0.0371246	-1.14769	0.000284009	-0.848912	0.000721
4772	NFATC1	-1.54944	0.00297588	-2.1564	0.000190831	-0.849421	0.000727
4891	SLC11A2	-1.3205	0.000184	-2.12686	4.01471e-06	-0.850528	0.00032
10979	FERMT2	-1.01579	0.000224	-1.69544	0.000191996	-0.851512	0.00261
6654	SOS1	-1.44168	0.000194	-0.902923	0.00237496	-0.856029	0.000862
11196	SEC23IP	-0.852876	0.000858	-2.36365	6.68248e-07	-0.856936	0.0011
253943	YTHDF3	-0.769102	0.0198658	-0.77462	0.00521933	-0.859111	0.00052
55706	NDC1	-0.702945	0.0298116	-2.95879	2.01249e-06	-0.860428	0.000176
54876	DCAF16	-1.54911	0.000187	-2.24928	7.87751e-06	-0.861133	0.0012
84553	FAXC	-1.42558	0.00268609	-1.44123	0.00151518	-0.863287	0.000419
7022	TFAP2C	-1.58373	2.72e-05	-1.94769	2.09924e-05	-0.863389	0.000114
4234	METTL1	-1.22478	0.000481	-1.09163	0.000581957	-0.863678	0.00013
4289	MKLN1	-1.544	0.000135	-1.22217	0.00033648	-0.864174	0.00661
56242	ZNF253	-1.3475	0.0007	-1.17979	0.000957611	-0.864246	0.00355
27304	MOCS3	-0.827147	0.00601066	-1.45583	8.52044e-05	-0.864283	0.00552
55119	PRPF38B	-0.496478	0.0308724	-1.73324	6.85212e-06	-0.866192	0.0015
23235	SIK2	-0.80614	0.021218	-0.905075	0.00758385	-0.866814	0.000607
10658	CELF1	-1.15282	0.0001	-2.10364	1.05369e-06	-0.868538	0.00124
26575	RGS17	-1.27743	0.0164502	-1.18715	0.0166764	-0.870009	0.00459
54801	HAUS6	-1.44153	0.0115185	-1.84752	0.00164653	-0.870256	0.000128
55149	MTPAP	-1.1174	0.000185	-1.68639	0.000144769	-0.87275	0.000355
81034	SLC25A32	-1.64161	9.43e-06	-0.913631	0.000227729	-0.873523	0.000298
23143	LRCH1	-1.74661	0.000302	-1.47107	0.000528222	-0.873855	0.00455
9043	SPAG9	-1.24003	0.0111395	-2.2855	0.000130641	-0.874423	0.00056
375444	C5orf34	-1.67372	0.00015	-1.34387	0.000344326	-0.877083	0.000269
10436	EMG1	-0.868079	0.000632	-0.422871	0.0280749	-0.878659	0.000163
84259	DCUN1D5	-1.28091	4.31e-05	-0.889012	0.000249144	-0.879843	0.000344
22890	ZBTB1	-1.54698	1.63e-05	-1.27025	2.93738e-05	-0.881463	0.000345
79913	ACTR5	-1.57695	0.00143925	-2.18569	8.80266e-05	-0.882587	8.44e-05
53344	CHIC1	-0.836423	0.0142983	-1.04225	0.00252425	-0.882625	0.011
57472	CNOT6	-0.982987	0.00163613	-2.3768	2.64126e-06	-0.883045	7.66e-05
5771	PTPN2	-0.611156	0.00838185	-0.895487	0.00164132	-0.883207	0.000107
84376	HOOK3	-0.569956	0.00933426	-0.424236	0.030405	-0.88344	0.000131
116039	OSR2	-2.2861	1.46e-05	-1.7965	3.53007e-05	-0.884061	0.000179
5727	PTCH1	-1.37031	0.00982998	-1.35996	0.00677525	-0.88565	0.000344
60625	DHX35	-1.40529	0.00135602	-0.872492	0.015009	-0.887026	0.00288
7158	TP53BP1	-0.71828	0.0260565	-1.17589	0.000913692	-0.88722	0.0181
6857	SYT1	-3.66965	3.77e-07	-4.41891	6.40615e-08	-0.887708	0.000218
10721	POLQ	-1.82679	0.00068	-1.93649	0.000249144	-0.889852	0.000144
55096	EBLN2	-0.971015	0.00912597	-0.938132	0.00734159	-0.890309	0.000797
4931	NVL	-1.7432	6.82e-05	-1.55772	7.0744e-05	-0.891769	0.000271
136051	ZNF786	-1.22755	0.00220924	-0.992725	0.00510823	-0.892591	0.000537
22882	ZHX2	-3.82052	7.36e-06	-3.77594	3.67111e-06	-0.892794	0.000238
27316	RBMX	-0.624059	0.00848302	-2.02526	2.29683e-06	-0.894476	0.000171
93323	HAUS8	-1.55637	0.00477033	-1.13154	0.019127	-0.895569	0.0002
22868	FASTKD2	-0.598198	0.0353841	-2.03499	9.77569e-06	-0.897124	0.00111
92106	OXNAD1	-0.912212	0.00252515	-0.822945	0.00295077	-0.897966	0.000866
64418	TMEM168	-0.926574	0.00307026	-2.18641	5.73108e-06	-0.899214	0.000637
54014	BRWD1	-2.28853	0.000459	-2.41637	1.83698e-05	-0.899712	0.00337
163882	CNST	-2.06709	0.000355	-1.18066	0.0226451	-0.899727	0.000933
160335	TMTC2	-2.34213	8.17e-06	-2.69895	1.59621e-06	-0.900477	0.00071
84190	METTL25	-0.998254	0.0250304	-2.28815	8.47002e-05	-0.90107	0.00047
26053	AUTS2	-1.15293	0.0159281	-0.908759	0.0368461	-0.901718	0.000626
23054	NCOA6	-1.08457	0.00252089	-1.10881	0.00132467	-0.902536	0.000211
5279	PIGC	-0.898668	0.00400616	-1.34896	0.000158685	-0.903093	0.000372
22852	ANKRD26	-0.993212	0.0188051	-0.98425	0.0135173	-0.904342	0.00212
9928	KIF14	-2.36223	0.000129	-1.90859	0.000277772	-0.904405	0.000117
79759	ZNF668	-1.28053	0.0138543	-1.27483	0.00953597	-0.905855	0.00132
55832	CAND1	-0.882129	0.0083035	-1.98194	6.12866e-06	-0.907768	0.000102
60386	SLC25A19	-0.773337	0.00549272	-0.683199	0.00737419	-0.908571	0.00051
10564	ARFGEF2	-0.914154	0.00264168	-1.86966	1.25673e-05	-0.909717	0.000206
79828	METTL8	-0.824979	0.0101494	-1.71247	5.16289e-05	-0.911474	0.0003
55170	PRMT6	-0.813671	0.00848099	-0.826077	0.0050396	-0.911577	0.00013
6198	RPS6KB1	-0.638607	0.00430818	-0.572101	0.00532241	-0.911972	0.000156
81550	TDRD3	-1.37814	0.00417545	-1.28555	0.000622539	-0.913444	0.00343
26054	SENP6	-0.720092	0.0089659	-0.634485	0.0122116	-0.91598	0.00092
2263	FGFR2	-1.68122	0.00264148	-2.34844	0.000293556	-0.916382	0.00033
10667	FARS2	-1.39717	0.00483875	-2.70017	3.55245e-05	-0.916407	0.0163
23051	ZHX3	-1.28181	0.00813838	-1.60961	0.00124802	-0.916463	0.00119
57673	BEND3	-1.3005	0.0035167	-1.56698	0.000629507	-0.916742	0.000102
55143	CDCA8	-1.26775	0.000656	-0.552678	0.0484153	-0.917188	0.00629
149371	EXOC8	-1.81915	0.000702	-2.05322	0.000165664	-0.917798	0.000397
161882	ZFPM1	-0.92935	0.00705676	-0.758299	0.0147609	-0.918051	0.000326
195828	ZNF367	-2.385	0.000503	-3.22095	3.51609e-05	-0.918063	0.000612
90	ACVR1	-1.97109	4.59e-05	-1.34988	0.000293129	-0.9181	0.000561
54971	BANP	-3.23411	5.43e-06	-1.74711	0.000144309	-0.91817	0.000123
55719	SLF2	-0.92673	0.0314355	-1.42725	0.00439955	-0.918296	0.00121
10640	EXOC5	-0.479912	0.0288757	-0.667258	0.00301348	-0.918498	0.000156
10198	MPHOSPH9	-1.7548	0.000782	-2.34296	6.004e-05	-0.920205	0.000456
54497	HEATR5B	-1.73916	0.00776863	-2.7489	0.000242687	-0.920781	0.00545
51755	CDK12	-2.06461	0.000334	-2.02082	8.64634e-05	-0.921344	0.000168
50807	ASAP1	-3.33668	2.72e-06	-3.77171	6.34314e-07	-0.921523	0.000184
1062	CENPE	-2.33267	3.03e-05	-2.29514	1.65378e-05	-0.921674	0.000139
151246	SGO2	-1.64248	2.72e-05	-0.728653	0.00677028	-0.924219	0.000284
84986	ARHGAP19	-1.68888	2.52e-05	-1.58828	1.84065e-05	-0.924645	0.000149
55038	CDCA4	-1.27579	0.000437	-0.845771	0.00367621	-0.927194	0.000178
165055	CCDC138	-1.27025	0.0392566	-1.76378	0.00457098	-0.928138	0.00375
155435	RBM33	-2.66755	1.4e-05	-1.10447	0.00575292	-0.928389	0.000154
55127	HEATR1	-1.0135	0.00451435	-1.34922	0.000422376	-0.929996	8.1e-05
2188	FANCF	-1.00801	0.0042247	-0.873058	0.00639683	-0.930173	0.00835
9611	NCOR1	-0.661177	0.0312549	-1.39867	0.000200175	-0.930708	0.00131
8317	CDC7	-0.657727	0.0301745	-0.84722	0.00512457	-0.933925	0.00238
23545	ATP6V0A2	-1.95785	0.000337	-1.22915	0.00406884	-0.934339	0.0011
138199	CARNMT1	-0.79622	0.0184139	-1.03324	0.00263713	-0.934934	0.00875
9792	SERTAD2	-1.21449	0.00056	-1.09395	0.000626718	-0.936694	9.74e-05
29841	GRHL1	-1.29472	0.000909	-2.89535	2.39766e-06	-0.936946	0.000479
10927	SPIN1	-1.14408	0.000107	-0.694989	0.00158396	-0.937492	0.000125
27349	MCAT	-0.864316	0.0335626	-1.16067	0.00457098	-0.938124	0.000485
891	CCNB1	-0.895447	0.00233659	-1.24647	0.000145191	-0.945413	0.000832
79888	LPCAT1	-0.482636	0.0494645	-1.54411	2.39103e-05	-0.946351	0.000341
4430	MYO1B	-0.690698	0.00400848	-1.30021	3.41936e-05	-0.947509	0.000482
57494	RIMKLB	-2.62903	6.26e-05	-2.97059	1.34704e-05	-0.949452	0.000501
9147	NEMF	-0.5645	0.0333171	-1.57436	3.36172e-05	-0.95198	0.000268
5290	PIK3CA	-0.691996	0.0113264	-1.0611	0.00594467	-0.952293	0.000611
23041	MON2	-1.24225	0.000127	-2.02988	2.57543e-06	-0.955242	0.000304
9648	GCC2	-0.944572	0.00607636	-1.04542	0.00203119	-0.955847	0.00015
123096	SLC25A29	-1.12427	0.00850417	-2.15776	7.16708e-05	-0.956802	0.00127
91750	LIN52	-3.31287	3.59e-06	-2.10049	2.97095e-05	-0.957329	0.00156
121665	SPPL3	-1.34846	0.000188	-2.09481	5.07191e-06	-0.957897	0.000148
25926	NOL11	-0.818244	0.000955	-0.707313	0.00145186	-0.958842	6.71e-05
51123	ZNF706	-0.441192	0.0471918	-0.605876	0.00627805	-0.958859	7.33e-05
5921	RASA1	-1.58959	1.81e-05	-1.54964	1.04145e-05	-0.962875	0.00112
1352	COX10	-1.09839	0.00343481	-0.632916	0.0452253	-0.96323	0.00245
10513	APPBP2	-0.896074	0.000396	-0.698496	0.00118523	-0.963406	7.02e-05
3781	KCNN2	-1.23538	0.0012737	-1.44427	0.000252386	-0.964001	0.0038
55278	QRSL1	-1.1468	0.00409621	-1.16354	0.00232914	-0.964081	0.00143
59338	PLEKHA1	-0.614707	0.0164568	-0.517082	0.0277415	-0.964217	0.000789
171392	ZNF675	-1.08079	0.000382	-1.09034	0.000192414	-0.966365	0.000164
9135	RABEP1	-1.13897	0.000783	-1.92251	1.25412e-05	-0.966599	7.38e-05
54617	INO80	-2.08636	5.12e-05	-1.76482	7.54925e-05	-0.966812	0.000623
132320	SCLT1	-0.874723	0.00406536	-1.75018	2.31383e-05	-0.966869	0.000684
201626	PDE12	-0.620049	0.0199955	-1.41596	0.00107897	-0.9688	0.000119
22878	TRAPPC8	-1.33752	0.000137	-2.17576	2.78498e-06	-0.97014	0.000238
121260	SLC15A4	-0.697404	0.0136168	-0.512283	0.044447	-0.970933	0.0004
84134	TOMM40L	-0.58314	0.0315647	-0.924678	0.00146271	-0.973002	0.00014
5087	PBX1	-1.03494	0.00204765	-1.65631	7.44108e-06	-0.973312	0.000206
81619	TSPAN14	-1.45511	0.00014	-1.41408	8.52044e-05	-0.976594	7.84e-05
116988	AGAP3	-1.22049	0.00171526	-1.3563	0.000498632	-0.978014	0.000675
81931	ZNF93	-1.10002	0.00117622	-0.751932	0.0473086	-0.979986	0.000463
140862	ISM1	-0.962385	0.0245784	-2.61466	2.6087e-05	-0.980122	0.00445
7871	SLMAP	-1.65625	0.00111264	-2.66331	2.46952e-05	-0.980366	9.55e-05
159	ADSS	-1.16922	0.00143745	-1.64158	8.08589e-05	-0.980579	0.000374
80255	SLC35F5	-1.07711	0.000807	-1.88785	1.00311e-05	-0.980708	0.000403
54454	ATAD2B	-1.71597	0.000154	-3.33469	1.11795e-06	-0.981061	5.61e-05
63897	HEATR6	-0.510339	0.0159697	-0.451758	0.0208875	-0.981104	5.02e-05
1946	EFNA5	-1.17323	0.011712	-1.60058	0.00111202	-0.982468	0.00328
23417	MLYCD	-0.987473	0.0223588	-1.1297	0.00724698	-0.984255	0.000466
81610	FAM83D	-1.73818	8.69e-06	-1.18586	5.10102e-05	-0.984735	7.06e-05
55760	DHX32	-1.1957	0.000125	-1.42051	1.93703e-05	-0.985104	9.72e-05
55858	TMEM165	-0.897011	0.0130306	-2.12986	2.85728e-05	-0.985724	7.38e-05
63027	SLC22A23	-2.0661	0.00031	-2.58758	3.54961e-05	-0.985855	0.000218
50618	ITSN2	-2.10665	7.16e-05	-2.00858	4.82892e-05	-0.986583	0.000378
9617	MTRF1	-1.36949	0.00289082	-1.85287	0.000225107	-0.987202	0.00141
56704	JPH1	-1.58222	0.000588	-1.82589	0.000118091	-0.987345	0.00013
23299	BICD2	-0.711927	0.0059852	-0.720397	0.00353692	-0.988192	0.000101
102	ADAM10	-0.70263	0.0302269	-2.61592	4.42042e-06	-0.989618	0.00167
79020	C7orf25	-1.20445	0.000421	-0.836195	0.00264975	-0.991529	0.000395
4763	NF1	-0.560836	0.0340331	-1.76923	0.000531566	-0.991899	0.000151
57148	RALGAPB	-1.23632	0.000319	-1.61561	2.74589e-05	-0.993148	0.000247
27332	ZNF638	-1.49302	5.5e-05	-0.932076	0.000661025	-0.993487	0.000163
26747	NUFIP1	-1.247	0.000121	-1.37386	0.00383658	-0.994178	0.000424
23314	SATB2	-2.18274	7.57e-05	-2.68562	9.29113e-06	-0.997499	6.51e-05
57703	CWC22	-1.52063	0.000209	-0.952608	0.00252961	-0.998091	8.56e-05
55160	ARHGEF10L	-1.63791	0.000816	-2.11377	7.85523e-05	-0.999053	0.000644
27086	FOXP1	-3.06033	3.65e-06	-1.95223	4.43993e-05	-1.00011	8.77e-05
23360	FNBP4	-1.54121	8.88e-05	-1.1895	0.00025446	-1.00263	0.000118
10802	SEC24A	-1.09958	0.000396	-2.73374	6.43278e-07	-1.00518	0.000641
27125	AFF4	-1.2552	0.000242	-0.720181	0.00509661	-1.0056	0.000363
965	CD58	-1.26112	9.57e-05	-1.29008	3.97762e-05	-1.00958	0.00229
56990	CDC42SE2	-1.41469	3.65e-05	-1.71802	7.97607e-05	-1.01082	0.000586
170506	DHX36	-0.767338	0.00105289	-0.516931	0.00754812	-1.01252	7.71e-05
8220	ESS2	-0.700554	0.0299181	-0.781923	0.0117122	-1.01255	0.0017
60436	TGIF2	-2.05841	2.02e-05	-1.81339	2.29096e-05	-1.01262	6.77e-05
55172	DNAAF2	-1.11693	0.000268	-0.857908	0.00086747	-1.01292	0.000204
79612	NAA16	-1.45521	0.00278626	-2.08328	0.000145338	-1.01357	0.000829
5706	PSMC6	-0.528591	0.0122322	-0.827137	0.000462034	-1.0137	0.000608
81539	SLC38A1	-0.581922	0.00622064	-1.11694	4.95974e-05	-1.01403	6.13e-05
51061	TXNDC11	-1.99911	0.000602	-2.08737	0.00024264	-1.01486	0.000311
6671	SP4	-1.37065	5.72e-05	-0.545609	0.0115969	-1.01545	0.00161
55591	VEZT	-0.981385	0.000937	-2.33452	0.000209957	-1.01589	0.000216
9517	SPTLC2	-1.7528	0.000143	-1.73474	7.74202e-05	-1.01593	0.000116
23362	PSD3	-3.46489	4.42e-06	-4.23704	6.45776e-07	-1.0162	0.00012
23142	DCUN1D4	-1.32132	0.00284592	-1.3986	1.92902e-05	-1.01966	0.00038
7405	UVRAG	-4.20248	8.96e-06	-4.01849	5.58968e-06	-1.01987	0.0002
56992	KIF15	-1.6124	0.000244	-1.07077	0.00205177	-1.02245	0.000274
54502	RBM47	-1.99668	3.9e-06	-2.74691	3.46541e-07	-1.02323	8.02e-05
2195	FAT1	-0.934531	0.0114478	-1.87278	7.68254e-05	-1.02537	6.16e-05
3007	HIST1H1D	-4.20934	3.59e-06	-3.21763	8.68518e-06	-1.02692	0.00177
3337	DNAJB1	-0.67008	0.00779354	-1.22998	8.68503e-05	-1.02969	3.96e-05
10363	HMG20A	-0.805136	0.00179201	-1.18735	7.40019e-05	-1.02981	0.000101
29123	ANKRD11	-2.53191	4.42e-06	-2.0315	8.87239e-06	-1.0301	7.59e-05
9334	B4GALT5	-0.887736	0.00260295	-1.74197	1.62721e-05	-1.03284	8.02e-05
55102	ATG2B	-1.04369	0.000714	-2.53389	8.57298e-06	-1.03322	0.000101
26115	TANC2	-3.18876	5.07e-05	-5.23245	2.69342e-06	-1.03349	8.58e-05
6871	TADA2A	-1.40267	0.00230855	-1.24044	0.00305113	-1.03354	0.00012
641	BLM	-2.0892	1.13e-05	-2.6413	1.29521e-06	-1.03361	6.2e-05
53944	CSNK1G1	-2.44806	3.25e-06	-2.51432	1.23567e-06	-1.03404	4.53e-05
79892	MCMBP	-0.672075	0.0230141	-1.45653	0.000525142	-1.03593	0.000139
29915	HCFC2	-1.22441	0.00220078	-1.53594	0.000281647	-1.03686	0.000573
23210	JMJD6	-2.43682	9.62e-06	-2.40063	5.05239e-06	-1.03958	3.45e-05
54443	ANLN	-1.00566	0.00292265	-3.20584	9.01127e-07	-1.03986	0.000217
51018	RRP15	-0.918683	0.00297863	-0.922858	0.00176985	-1.04005	0.000905
10142	AKAP9	-1.2948	0.00126127	-1.94838	4.45679e-05	-1.04048	0.000692
26750	RPS6KC1	-2.43887	7.19e-05	-3.06877	7.6864e-06	-1.04279	0.000598
79074	C2orf49	-2.68183	8.62e-05	-3.36716	9.28132e-06	-1.04313	0.000548
23347	SMCHD1	-2.00345	3.85e-05	-2.66043	2.06898e-06	-1.04628	6.12e-05
22908	SACM1L	-0.697098	0.0366231	-1.08407	0.00203412	-1.04867	0.000107
84081	NSRP1	-1.05581	0.00027	-0.482355	0.0203092	-1.05077	0.0014
57619	SHROOM3	-1.06889	0.00136986	-1.07955	0.000862105	-1.05247	0.00122
23338	JADE2	-2.6122	5.65e-06	-2.13149	9.77569e-06	-1.05474	0.000183
79830	ZMYM1	-2.00789	8.94e-05	-0.881621	0.00982026	-1.05483	4.96e-05
54780	NSMCE4A	-0.767706	0.002813	-1.89135	4.02147e-06	-1.05749	0.00066
23215	PRRC2C	-1.06148	0.000334	-1.17317	7.66838e-05	-1.05865	0.00012
64282	TENT4B	-1.52845	0.000284	-1.35345	5.43152e-05	-1.05896	0.00066
4751	NEK2	-0.874765	0.0154183	-0.986303	0.00514931	-1.05918	0.000787
55298	RNF121	-1.02873	0.00111211	-1.09873	0.000408151	-1.05941	0.000246
285331	CCDC66	-0.898099	0.00431989	-0.558268	0.038196	-1.06035	0.00314
79832	QSER1	-0.821084	0.00610072	-1.02107	0.000950015	-1.06037	4e-05
64924	SLC30A5	-0.609525	0.0229258	-1.21248	0.000197841	-1.0608	9.16e-05
136	ADORA2B	-0.552182	0.0248114	-1.58996	1.80484e-05	-1.06208	0.000667
11232	POLG2	-1.86454	5.84e-05	-1.17572	0.000663704	-1.06556	0.000128
1677	DFFB	-0.652023	0.0118493	-0.763497	0.00302073	-1.06619	0.000277
7884	SLBP	-0.764972	0.00240305	-0.953689	0.000323944	-1.06641	0.000123
9197	SLC33A1	-1.04206	0.00301738	-1.87595	1.77986e-06	-1.06677	5.18e-05
253959	RALGAPA1	-1.71024	0.000103	-3.54257	5.65977e-07	-1.06683	0.000206
8805	TRIM24	-1.92093	7.5e-06	-1.01297	0.000244833	-1.06946	0.000321
153129	SLC38A9	-2.06656	3.87e-05	-3.08661	1.4629e-06	-1.07056	0.000133
394	ARHGAP5	-1.88325	3.44e-05	-1.78164	2.40021e-05	-1.07233	0.000249
55159	RFWD3	-1.52967	0.000155	-1.47448	0.000100425	-1.07261	4.06e-05
84775	ZNF607	-1.63405	0.000283	-1.42582	0.00038389	-1.07282	0.00224
116068	LYSMD3	-0.958105	0.00780505	-0.949429	0.00532038	-1.07467	4.12e-05
54881	TEX10	-2.00707	9.13e-05	-1.89936	6.46231e-05	-1.07572	8.31e-05
3607	FOXK2	-2.08461	2.49e-05	-0.976626	0.00173541	-1.07575	0.000119
905	CCNT2	-2.65846	0.000331	-2.66099	0.000175756	-1.0766	0.000164
10087	COL4A3BP	-1.39456	2.47e-05	-1.73995	1.21483e-05	-1.077	0.000467
1977	EIF4E	-0.48327	0.0277537	-1.08117	0.00176752	-1.07726	8.56e-05
580	BARD1	-2.26718	5.34e-05	-1.54076	0.000357774	-1.0792	0.000595
11254	SLC6A14	-1.15682	0.0005	-0.997479	0.000755723	-1.08053	0.000538
92181	UBTD2	-1.23115	0.000326	-0.99669	0.000748189	-1.08411	0.000464
4254	KITLG	-1.3443	4.68e-05	-2.39476	6.43278e-07	-1.08555	9.02e-05
25836	NIPBL	-2.00327	4.34e-06	-2.58083	7.9301e-05	-1.08612	0.000329
55227	LRRC1	-1.6838	0.000476	-3.23069	3.37409e-06	-1.08775	9.67e-05
55638	SYBU	-0.892156	0.018312	-1.01267	0.00601729	-1.08858	0.000843
80018	NAA25	-1.5065	0.0009	-1.86694	4.66223e-06	-1.08934	0.000132
64859	NABP1	-2.1531	0.000134	-1.42956	0.00153965	-1.08967	0.000439
10294	DNAJA2	-0.692967	0.0243786	-0.949152	0.000426913	-1.08967	4.38e-05
93183	PIGM	-0.736513	0.00648304	-2.06389	4.29529e-06	-1.09008	8.28e-05
132949	AASDH	-1.87459	7.41e-05	-1.31231	0.000415854	-1.09308	0.000128
60491	NIF3L1	-0.486869	0.0215679	-1.02806	0.000119755	-1.09392	3.98e-05
26271	FBXO5	-1.69222	1.81e-05	-1.50926	1.85473e-05	-1.09425	5.72e-05
26043	UBXN7	-1.79188	0.000269	-1.20149	0.00212145	-1.09433	0.000283
80351	TNKS2	-1.26982	0.00017	-1.76491	4.9626e-06	-1.09444	0.00208
23503	ZFYVE26	-0.752336	0.0435091	-1.58564	0.000340742	-1.09489	0.00126
9690	UBE3C	-0.782731	0.00224533	-0.897938	0.000412163	-1.09749	0.00119
151393	RMDN2	-0.685853	0.0462978	-0.639134	0.0465575	-1.10093	0.00376
57539	WDR35	-0.898726	0.0237524	-1.4058	5.62497e-05	-1.10094	0.000173
27236	ARFIP1	-0.999997	0.00222382	-1.23787	0.000313154	-1.10129	0.000363
8505	PARG	-0.593016	0.00950947	-1.08729	0.00011123	-1.10197	0.000819
29967	LRP12	-1.78112	0.000752	-1.9585	0.00021445	-1.10319	0.00028
23001	WDFY3	-2.26346	0.000211	-2.04968	0.000211458	-1.10341	0.00013
25929	GEMIN5	-0.864651	0.00197542	-0.508607	0.0269856	-1.10348	5.26e-05
5316	PKNOX1	-1.25483	0.00601623	-0.787301	0.0468739	-1.10372	0.000109
11083	DIDO1	-1.90742	0.000139	-1.50376	0.000360284	-1.10376	0.000203
57621	ZBTB2	-1.97058	1.64e-05	-1.4797	5.46508e-05	-1.1054	0.000152
9369	NRXN3	-3.46302	2.56e-06	-4.13331	4.37245e-07	-1.10612	0.00076
10038	PARP2	-0.906739	0.00214837	-0.725777	0.0212769	-1.10654	0.0001
23506	BICRAL	-1.53775	0.000111	-2.49483	2.85821e-05	-1.10917	0.00647
79723	SUV39H2	-0.676695	0.00548978	-0.870992	0.000666077	-1.11219	5.15e-05
6645	SNTB2	-1.02233	0.00112691	-1.67435	2.23109e-05	-1.1127	0.00199
57708	MIER1	-2.18492	0.000409	-1.58508	0.00195473	-1.11284	0.000346
85459	CEP295	-1.46695	0.00768625	-1.53549	0.0037453	-1.11364	0.00151
84135	UTP15	-1.22018	0.00397872	-1.01722	0.00753395	-1.11752	0.000136
23108	RAP1GAP2	-1.87176	2.78e-05	-1.04253	0.000734248	-1.11886	8.53e-05
5728	PTEN	-0.94577	0.000852	-1.92539	1.89029e-05	-1.12078	0.000184
5287	PIK3C2B	-0.904594	0.00102068	-1.62148	1.1031e-05	-1.12158	5.26e-05
122961	ISCA2	-0.634388	0.0107894	-0.605265	0.00939577	-1.12163	0.000119
150468	CKAP2L	-1.90863	2.86e-05	-0.728422	0.00831314	-1.12166	0.000179
5311	PKD2	-0.906515	0.0268984	-1.38731	0.00148505	-1.12191	0.000128
11320	MGAT4A	-1.41905	0.00161236	-2.34887	3.00397e-05	-1.12222	0.000173
8945	BTRC	-1.83544	8.87e-05	-2.10638	1.71737e-05	-1.12224	8.95e-05
2491	CENPI	-1.38836	0.000319	-2.74456	0.000237699	-1.12236	0.000779
157922	CAMSAP1	-2.23391	3.47e-06	-2.04605	2.64004e-06	-1.12303	3.3e-05
55610	VPS50	-1.00983	0.0008	-2.20419	8.26697e-05	-1.1231	9.17e-05
6428	SRSF3	-0.823999	0.00118225	-3.69408	5.97114e-07	-1.12376	7.05e-05
3832	KIF11	-2.14124	0.00018	-3.11286	7.60115e-06	-1.12533	6.18e-05
140688	NOL4L	-3.23374	0.000164	-3.34024	6.70882e-05	-1.12592	0.000271
5289	PIK3C3	-1.5428	5.91e-05	-1.92318	6.6568e-06	-1.12625	5.81e-05
387032	ZKSCAN4	-0.482757	0.0176169	-0.739588	0.000846249	-1.12667	0.000541
2549	GAB1	-2.14365	1.21e-05	-2.07055	7.36824e-06	-1.12744	0.000137
51230	PHF20	-2.59615	2.11e-05	-2.18294	1.53244e-05	-1.12956	0.000144
79915	ATAD5	-1.57734	0.000428	-1.5811	0.000227455	-1.13113	0.00216
57620	STIM2	-1.83345	8.24e-05	-2.5744	4.29529e-06	-1.13141	5.73e-05
57591	MRTFA	-0.658164	0.0336813	-0.758601	0.0112756	-1.1325	0.000341
259266	ASPM	-1.64394	2.22e-05	-1.84274	5.09875e-06	-1.13251	0.000248
5903	RANBP2	-1.52919	0.000547	-2.53422	9.77569e-06	-1.13384	0.000104
7371	UCK2	-1.34508	0.000133	-0.627987	0.00980811	-1.13816	2.41e-05
80264	ZNF430	-1.08481	0.0125041	-0.98473	0.0143846	-1.13922	0.000468
84816	RTN4IP1	-1.78473	5.36e-05	-3.05982	8.85064e-07	-1.14175	0.000268
57478	USP31	-2.13026	0.00429982	-0.835057	0.00827599	-1.14206	0.000258
7073	TIAL1	-0.919681	0.023179	-1.8617	0.000177773	-1.14313	9.02e-05
402682	UFSP1	-1.64922	0.000557	-1.2174	0.0023342	-1.14324	0.000126
55534	MAML3	-1.09369	0.0308142	-1.39638	0.00556257	-1.14331	9e-05
57724	EPG5	-1.86553	0.000152	-2.22669	2.33479e-05	-1.14439	0.00301
10001	MED6	-1.41393	5.88e-05	-2.31748	1.23567e-06	-1.14544	6.24e-05
54532	USP53	-1.48704	0.00542601	-1.07182	0.0222921	-1.1472	0.000144
55005	RMND1	-0.684207	0.0178485	-1.09727	0.000628909	-1.14721	3.26e-05
116150	NUS1	-0.900083	0.000845	-0.800866	0.00105206	-1.14736	0.000142
5514	PPP1R10	-1.2739	0.0012768	-1.48683	0.00107283	-1.14833	0.00277
84945	ABHD13	-0.81152	0.0125611	-1.09988	0.0012632	-1.14965	0.00207
112970	KTI12	-1.48156	0.000818	-1.62401	0.000242375	-1.15112	4.97e-05
11044	TENT4A	-1.93327	9.41e-06	-0.925385	0.000644625	-1.15186	6.97e-05
7804	LRP8	-1.04028	0.000503	-3.04643	3.47411e-07	-1.15242	0.000183
7702	ZNF143	-1.77794	0.000222	-0.707495	0.0342928	-1.15277	0.000969
399665	FAM102A	-1.35755	0.0115782	-1.97333	0.000714786	-1.15345	8.36e-05
11236	RNF139	-1.15197	9.34e-05	-0.747009	0.000890224	-1.15501	4.08e-05
10150	MBNL2	-1.33114	0.000594	-1.73138	5.34739e-05	-1.15541	4.24e-05
11138	TBC1D8	-1.40683	0.017351	-1.1574	0.0324155	-1.15632	7.38e-05
80331	DNAJC5	-1.17453	0.00190113	-1.03148	0.00263522	-1.15657	0.00014
54407	SLC38A2	-3.02083	4.82e-07	-2.15183	1.20123e-06	-1.15726	0.000133
5796	PTPRK	-1.36905	0.000576	-2.39789	7.15662e-06	-1.15955	3.32e-05
130507	UBR3	-1.3272	0.000136	-3.3382	2.85659e-07	-1.15961	0.000294
57403	RAB22A	-1.14261	0.000167	-1.4239	1.92395e-05	-1.15978	3.02e-05
55870	ASH1L	-2.26374	4.86e-06	-2.97027	3.64028e-06	-1.1601	0.000364
26953	RANBP6	-1.36115	0.00223805	-2.42959	2.56722e-05	-1.16015	0.000169
4739	NEDD9	-0.638403	0.048348	-0.691041	0.0102928	-1.16432	0.000884
79760	GEMIN7	-0.705042	0.0170356	-1.27545	6.33997e-05	-1.16481	0.000312
114791	TUBGCP5	-1.2725	0.000633	-1.37124	0.000205359	-1.16624	0.000663
23522	KAT6B	-3.46378	1.66e-06	-4.40429	2.25382e-07	-1.16724	9.74e-05
3839	KPNA3	-0.961466	0.000961	-2.26901	1.81087e-06	-1.16821	0.000158
51427	ZNF107	-1.81325	0.00128204	-1.89948	0.000545433	-1.16905	0.00501
868	CBLB	-2.65136	1.81e-05	-2.82469	5.79629e-06	-1.16917	0.000115
79697	RIOX1	-0.582062	0.00898504	-0.403003	0.0414626	-1.17029	3.21e-05
3775	KCNK1	-1.62341	3.47e-05	-1.60561	1.80639e-05	-1.17035	4.44e-05
55254	TMEM39A	-2.99903	2.03e-05	-1.18597	0.00494729	-1.17258	0.000135
7518	XRCC4	-1.79188	9.07e-05	-2.81506	7.69418e-06	-1.17431	0.000857
93594	TBC1D31	-2.45623	2.92e-06	-1.64291	1.65378e-05	-1.17509	6.24e-05
2060	EPS15	-2.00625	0.000199	-2.67678	1.47366e-05	-1.17715	6.77e-05
10672	GNA13	-0.525923	0.0258286	-0.792209	0.0339304	-1.17733	4.08e-05
5001	ORC5	-2.14875	5.58e-06	-1.78815	6.31707e-05	-1.17756	0.000281
51479	ANKFY1	-0.999455	0.000525	-1.87246	4.27674e-06	-1.17764	3.31e-05
79230	ZNF557	-1.05647	0.00607786	-0.93774	0.00791828	-1.17879	0.00103
23507	LRRC8B	-1.02783	0.00472362	-1.27105	0.00073911	-1.17922	0.000191
3516	RBPJ	-1.06485	0.000188	-0.735617	0.00121781	-1.17926	0.000187
545	ATR	-0.948492	0.0101366	-1.88259	7.05207e-05	-1.18024	0.000107
23294	ANKS1A	-2.75609	2.33e-05	-2.81955	9.81959e-06	-1.18081	3.46e-05
84144	SYDE2	-0.801043	0.0464787	-1.08067	0.00682805	-1.18096	3.74e-05
55640	FLVCR2	-1.38996	0.000632	-1.96228	3.2828e-05	-1.18284	0.00197
2768	GNA12	-1.67935	0.000227	-2.10944	2.47574e-05	-1.18351	4.01e-05
246175	CNOT6L	-2.35992	3.11e-05	-3.80048	8.26115e-07	-1.18559	0.000758
5937	RBMS1	-2.687	4.34e-06	-3.28355	6.43278e-07	-1.18584	0.000121
57589	RIC1	-1.9287	0.00732417	-2.66269	0.000579678	-1.18692	0.000241
55284	UBE2W	-1.54045	0.000384	-1.22747	0.000990652	-1.18709	0.000245
55914	ERBIN	-1.3877	9.18e-05	-1.2601	8.56821e-05	-1.18936	0.0174
6788	STK3	-1.2055	0.000919	-2.65742	2.65088e-06	-1.19176	0.000451
8027	STAM	-2.10881	0.000138	-1.7638	0.000235851	-1.19336	3.54e-05
55573	CDV3	-0.683246	0.00307026	-0.565543	0.0155377	-1.1934	3.16e-05
51132	RLIM	-1.13654	0.000545	-1.36573	8.34915e-05	-1.19448	9.42e-05
4189	DNAJB9	-1.24587	0.0039059	-0.88255	0.00183661	-1.19462	0.00124
149041	RC3H1	-2.7266	3.39e-05	-3.49466	3.31925e-06	-1.19515	5.96e-05
7697	ZNF138	-0.863979	0.0319467	-0.905842	0.0177201	-1.19655	0.00162
55677	IWS1	-2.37875	8.96e-06	-1.88192	1.95142e-05	-1.20046	5.02e-05
25880	TMEM186	-1.04448	0.000689	-1.40524	4.95974e-05	-1.20061	1.99e-05
23398	PPWD1	-1.22896	0.00049	-1.08093	0.000646999	-1.20158	0.000211
493911	PHOSPHO2	-1.26858	0.00883892	-1.19877	0.00808047	-1.2022	0.000115
83732	RIOK1	-1.12998	0.000454	-0.525249	0.0277945	-1.20392	0.000156
9877	ZC3H11A	-0.881298	0.000803	-0.52893	0.0114768	-1.20492	3.97e-05
1456	CSNK1G3	-1.60135	0.00027	-0.812734	0.0115554	-1.20502	0.000983
84458	LCOR	-2.03384	1.28e-05	-2.68273	1.16259e-06	-1.20556	0.00181
11235	PDCD10	-0.817015	0.00144883	-0.959323	0.000280921	-1.20582	0.000102
51276	ZNF571	-0.961418	0.000921	-0.547168	0.0172316	-1.20704	0.000135
10054	UBA2	-0.905584	0.0126503	-1.03111	0.00388758	-1.20775	0.000225
51274	KLF3	-0.909593	0.00974931	-1.18732	0.00124843	-1.20854	3.87e-05
6197	RPS6KA3	-0.569514	0.0237901	-1.2005	0.00013931	-1.20966	8.95e-05
90693	CCDC126	-1.07344	0.0187383	-1.30129	0.00416031	-1.21037	0.000879
7109	TRAPPC10	-1.20136	0.00109295	-1.65587	6.88619e-05	-1.21055	0.000277
84640	USP38	-0.744449	0.019899	-1.14194	0.000176343	-1.21151	6.07e-05
10664	CTCF	-1.69832	1.98e-05	-0.618152	0.0078388	-1.21496	2.25e-05
9663	LPIN2	-1.57945	0.025338	-2.0067	0.00449978	-1.2159	4.76e-05
203522	INTS6L	-0.94477	0.0144446	-0.747543	0.0331816	-1.21609	0.000601
11179	ZNF277	-2.54785	1.25e-05	-2.42318	8.50784e-06	-1.2181	5.28e-05
64750	SMURF2	-2.42773	5.83e-06	-1.96364	3.4818e-06	-1.21817	5.67e-05
7718	ZNF165	-2.79118	2.48e-06	-2.245	3.76672e-06	-1.21915	0.000127
64858	DCLRE1B	-1.36534	3.03e-05	-1.47436	9.00469e-06	-1.22032	3.38e-05
9922	IQSEC1	-1.28744	0.00141807	-2.41385	1.14676e-05	-1.22104	0.00123
57526	PCDH19	-1.35112	6.15e-05	-2.95805	3.16473e-07	-1.22341	4.41e-05
7037	TFRC	-0.732055	0.0028404	-1.45469	1.64626e-05	-1.22466	3.31e-05
7514	XPO1	-1.71613	1.05e-05	-2.48798	6.13715e-07	-1.22492	2.78e-05
11216	AKAP10	-1.36988	0.00697933	-1.53119	0.00223429	-1.22548	3.28e-05
10224	ZNF443	-2.24912	3.65e-05	-2.38554	1.19776e-05	-1.22653	0.000163
25948	KBTBD2	-2.89566	3.62e-05	-1.35346	9.19236e-05	-1.22746	5.04e-05
253143	PRR14L	-1.44584	0.000229	-0.443622	0.043591	-1.22912	1.68e-05
57606	SLAIN2	-0.564898	0.0249644	-0.981709	0.000572705	-1.22929	9.74e-05
148254	ZNF555	-1.92686	0.000955	-1.96308	0.000479694	-1.23008	0.000218
56890	MDM1	-1.11728	0.0250113	-1.37559	0.00534355	-1.232	0.000435
23186	RCOR1	-2.46086	3.81e-05	-1.04222	0.00571336	-1.23304	2.98e-05
54874	FNBP1L	-1.29246	0.0139642	-1.30598	0.00882512	-1.23326	0.0016
57509	MTUS1	-1.98789	0.000151	-1.94066	1.41692e-05	-1.2358	0.000161
57609	DIP2B	-2.65275	5.13e-05	-3.7476	2.64004e-06	-1.23638	7.69e-05
113251	LARP4	-0.948265	0.0452372	-1.95955	1.64465e-05	-1.23719	7.57e-05
5775	PTPN4	-2.43383	5.64e-06	-4.01002	1.82072e-07	-1.23732	3.08e-05
11059	WWP1	-1.92933	3.19e-06	-2.61329	3.17491e-07	-1.23857	2.41e-05
26234	FBXL5	-1.37551	0.0132895	-2.07295	0.00066129	-1.23866	0.000195
57448	BIRC6	-1.37895	0.000328	-3.72319	1.60781e-06	-1.24062	0.000389
163051	ZNF709	-1.50632	0.000292	-1.79722	4.6342e-05	-1.24093	0.000296
9569	GTF2IRD1	-2.23915	6.2e-06	-2.31364	2.34841e-06	-1.24111	1.99e-05
10426	TUBGCP3	-2.41739	1.16e-05	-1.53675	0.00011366	-1.24274	4.01e-05
357	SHROOM2	-0.987265	0.00102955	-1.38315	5.80708e-05	-1.24274	0.000624
26091	HERC4	-1.01291	0.000331	-3.10497	1.98394e-07	-1.24303	4.61e-05
23080	AVL9	-1.59425	0.000124	-1.41819	0.000134551	-1.24588	7.37e-05
8821	INPP4B	-1.46228	0.000462	-2.88736	2.70393e-06	-1.24827	3.52e-05
6310	ATXN1	-3.5634	2.61e-06	-3.99461	6.27293e-07	-1.24884	0.000127
137209	ZNF572	-2.32083	0.00018	-2.13791	0.000160315	-1.2502	0.000435
4659	PPP1R12A	-1.9262	7.21e-06	-1.28179	4.79355e-05	-1.25177	3.79e-05
8301	PICALM	-0.893652	0.00154779	-1.32659	6.06356e-05	-1.25225	0.00327
10743	RAI1	-2.16916	0.00137775	-2.30523	0.000533538	-1.25393	9.4e-05
25788	RAD54B	-1.43215	0.000263	-1.9522	1.69902e-05	-1.25573	3.52e-05
375484	SIMC1	-1.29916	0.00184615	-2.84767	5.36666e-06	-1.25601	0.000111
4086	SMAD1	-1.89735	4.41e-05	-0.553039	0.0460684	-1.25608	0.000328
5523	PPP2R3A	-1.45982	0.00233463	-1.4892	5.7852e-05	-1.25664	3.67e-05
7727	ZNF174	-1.56039	0.00372032	-1.51157	0.00281843	-1.25677	1.97e-05
126295	ZNF57	-1.98107	7.1e-05	-0.770636	0.0158645	-1.25709	6.77e-05
63943	FKBPL	-1.74449	0.00262845	-1.67148	0.00209724	-1.25772	2.32e-05
79728	PALB2	-1.06261	0.00140846	-0.676888	0.0134357	-1.25861	0.000111
55632	G2E3	-3.0655	1.4e-06	-3.00789	6.40099e-07	-1.25944	0.000115
7357	UGCG	-2.87391	8.17e-06	-3.7977	7.54754e-07	-1.26376	0.00017
5048	PAFAH1B1	-2.30548	4.5e-06	-3.16525	3.87007e-07	-1.26758	4.71e-05
9321	TRIP11	-1.51537	0.00216167	-1.73034	0.000531457	-1.26883	2.77e-05
55070	DET1	-2.03137	7.11e-05	-1.01858	0.00362437	-1.27141	5.75e-05
51575	ESF1	-1.64591	0.0025513	-0.931673	0.00190593	-1.27191	3.21e-05
6526	SLC5A3	-1.7709	1.44e-05	-2.38913	1.1405e-06	-1.27399	3.42e-05
23112	TNRC6B	-1.61171	0.000154	-1.58191	8.83893e-05	-1.27406	1.56e-05
157313	CDCA2	-1.31704	0.000124	-0.795225	0.0135078	-1.27681	0.000146
146923	RUNDC1	-1.43923	0.000268	-0.567388	0.0413481	-1.27719	0.00231
8445	DYRK2	-2.29989	0.000353	-2.25176	0.000218635	-1.27784	0.000104
22862	FNDC3A	-1.74663	0.000284	-2.38215	1.83136e-05	-1.27906	3.17e-05
84923	FAM104A	-1.54319	1.67e-05	-0.743514	0.00116063	-1.27938	1.93e-05
51111	KMT5B	-0.996245	0.00740879	-1.50045	0.0023515	-1.28015	2.29e-05
144577	C12orf66	-0.704626	0.0224501	-0.632609	0.0270563	-1.28129	0.00011
9817	KEAP1	-0.483657	0.0231144	-1.08268	8.84857e-05	-1.28181	7.37e-05
8603	FAM193A	-1.65897	0.0144214	-1.62895	0.0107749	-1.28209	2.06e-05
26057	ANKRD17	-1.07949	0.000227	-0.908364	0.000386689	-1.28262	3.73e-05
55164	SHQ1	-1.00501	0.00122537	-2.54166	1.52482e-06	-1.28364	0.000538
1875	E2F5	-1.52047	0.000268	-0.732316	0.0152306	-1.28467	1.92e-05
59084	ENPP5	-1.92865	0.000422	-2.11923	0.000118273	-1.28473	0.000139
54843	SYTL2	-1.76157	1.11e-05	-1.80606	4.5878e-06	-1.28506	2.22e-05
11183	MAP4K5	-1.07408	0.00189238	-1.76156	3.81084e-05	-1.28669	0.000247
9829	DNAJC6	-3.11901	1.46e-05	-2.55918	2.61311e-05	-1.28921	5.64e-05
90826	PRMT9	-1.14746	0.00670472	-0.908468	0.0165209	-1.29037	1.38e-05
51096	UTP18	-0.765882	0.00597124	-2.988	6.04197e-07	-1.29112	0.00069
5373	PMM2	-1.3977	0.00160314	-1.31673	0.00140696	-1.29114	1.47e-05
10199	MPHOSPH10	-0.749195	0.00256552	-0.448407	0.0302816	-1.29333	1.99e-05
57224	NHSL1	-1.79975	0.00042	-2.07808	8.43034e-05	-1.29343	0.000387
9456	HOMER1	-1.63302	0.000126	-2.16387	9.56706e-06	-1.29391	2.89e-05
9584	RBM39	-2.02133	1.27e-05	-2.32687	2.59216e-06	-1.2942	2.41e-05
5427	POLE2	-1.10728	0.000116	-2.45229	4.37245e-07	-1.29421	0.000144
26269	FBXO8	-1.70071	0.00152872	-1.6725	0.00100599	-1.29476	0.000303
5000	ORC4	-0.841097	0.0015661	-0.949722	0.01338	-1.29703	0.000286
6461	SHB	-2.97699	5.76e-05	-2.9472	2.95125e-05	-1.30177	9.76e-05
27300	ZNF544	-1.72534	0.000149	-0.59888	0.0486356	-1.30509	4.31e-05
90381	TICRR	-1.45346	0.00031	-0.604925	0.0358163	-1.30793	0.000153
64318	NOC3L	-1.48216	6.11e-05	-0.988826	0.000469026	-1.30824	0.0002
79447	PAGR1	-1.44356	0.000267	-1.70291	4.53546e-05	-1.30829	3.3e-05
5150	PDE7A	-1.41505	0.000402	-0.996452	0.00233038	-1.30906	0.000377
59343	SENP2	-1.48485	8.52e-05	-1.71204	1.61691e-05	-1.31096	1.7e-05
23358	USP24	-1.29618	0.00231768	-1.93393	8.92509e-05	-1.31154	7.17e-05
1477	CSTF1	-0.844016	0.00597959	-1.08625	0.000734934	-1.313	5.07e-05
2909	ARHGAP35	-2.14585	5.64e-06	-1.85656	6.59729e-06	-1.31301	2e-05
5966	REL	-1.2576	0.00494567	-1.88338	0.000206246	-1.31453	0.000296
222584	FAM83B	-3.00245	1.48e-05	-4.04814	1.16259e-06	-1.31676	5.02e-05
10403	NDC80	-3.52669	2.77e-07	-1.88611	4.04677e-06	-1.3189	2.27e-05
25843	MOB4	-1.18736	0.000334	-1.30605	0.000175756	-1.31925	1.43e-05
55852	TEX2	-1.49552	4.12e-05	-2.18602	1.74213e-06	-1.32021	2.85e-05
1432	MAPK14	-1.48614	0.000345	-1.71631	7.02512e-05	-1.32161	4.14e-05
8036	SHOC2	-1.78922	7.64e-06	-1.12388	7.63694e-05	-1.32171	5.29e-05
221710	SMIM13	-1.14343	0.00111944	-1.06653	0.012764	-1.32384	4.91e-05
80012	PHC3	-1.17832	0.000322	-0.841182	0.00171437	-1.32939	5.28e-05
55074	OXR1	-0.688533	0.0106098	-0.569684	0.020145	-1.33108	0.000334
54894	RNF43	-2.32005	5.54e-05	-2.02259	6.65222e-05	-1.33187	6.03e-05
57520	HECW2	-1.59692	0.004019	-2.14244	0.000349777	-1.33303	0.00069
5581	PRKCE	-1.5545	0.0209067	-1.62174	0.0114069	-1.33338	5.26e-05
7074	TIAM1	-2.18096	0.00644367	-2.68455	0.00108282	-1.33355	0.00252
23075	SWAP70	-0.874477	0.0415113	-1.54822	0.00103797	-1.33392	0.000319
254394	MCM9	-1.02594	0.00843122	-1.995	6.47981e-05	-1.33418	0.000154
132864	CPEB2	-1.67438	0.00892944	-2.06167	0.00158435	-1.33744	0.000239
9126	SMC3	-1.44615	5.3e-05	-1.04742	0.000225798	-1.34028	1.84e-05
29761	USP25	-2.07575	8.87e-05	-1.30466	0.00103797	-1.34201	0.000105
9662	CEP135	-1.42997	0.000346	-2.39538	5.81344e-06	-1.34833	0.000258
375748	ERCC6L2	-0.953762	0.0112988	-1.6417	0.000213588	-1.34938	1.57e-05
84612	PARD6B	-1.75991	0.000118	-1.82567	4.53546e-05	-1.35445	3.9e-05
51742	ARID4B	-2.85152	3.55e-06	-3.00504	1.17194e-06	-1.35461	2.61e-05
8621	CDK13	-1.7047	6.79e-05	-1.69434	3.41936e-05	-1.3552	3.92e-05
26512	INTS6	-1.8583	3.81e-05	-0.945295	0.00181846	-1.35558	3.02e-05
150275	CCDC117	-0.619936	0.0248118	-0.820699	0.00338252	-1.35561	1.99e-05
171024	SYNPO2	-1.25297	0.0113631	-1.10794	0.00438511	-1.36002	3.67e-05
6502	SKP2	-0.786264	0.043102	-1.1355	0.000250738	-1.361	0.000179
7798	LUZP1	-1.66454	0.000144	-1.56857	0.000108292	-1.3619	0.000537
23185	LARP4B	-1.98189	2.01e-05	-1.70905	6.76756e-05	-1.36241	0.000972
10625	IVNS1ABP	-1.84082	0.000102	-1.76284	6.61316e-05	-1.36349	2.41e-05
3480	IGF1R	-3.05898	9.09e-06	-4.04278	8.50168e-07	-1.36853	1.62e-05
25962	VIRMA	-2.0144	0.000242	-0.632506	0.00485677	-1.36891	0.000716
80155	NAA15	-1.66219	0.000454	-2.23909	1.78417e-06	-1.36993	2.61e-05
10057	ABCC5	-1.10318	0.000219	-2.35232	8.85064e-07	-1.3705	1.86e-05
23047	PDS5B	-2.59076	2.56e-06	-2.98692	5.31989e-07	-1.37186	1.21e-05
55269	PSPC1	-0.921371	0.00122289	-3.19284	3.17491e-07	-1.37306	0.00292
10579	TACC2	-1.83518	0.000461	-1.91136	0.000187889	-1.37376	0.000173
221785	ZSCAN25	-1.45184	5.13e-05	-0.610668	0.00768089	-1.37686	0.00105
388650	FAM69A	-2.15059	0.000387	-3.22987	1.33941e-05	-1.37696	6e-05
528	ATP6V1C1	-1.3082	0.0049959	-3.33895	5.83307e-06	-1.37968	1.97e-05
30849	PIK3R4	-0.896734	0.00167538	-1.71901	1.19019e-05	-1.38188	3.32e-05
153396	TMEM161B	-2.55988	0.000481	-3.10669	6.92937e-05	-1.38363	7.05e-05
7903	ST8SIA4	-1.31794	0.00196939	-1.88354	0.000100527	-1.38497	8.88e-05
5318	PKP2	-1.2595	0.00558972	-1.94137	0.000194838	-1.38664	0.00252
57551	TAOK1	-1.56728	0.00194077	-1.98555	0.000228771	-1.38764	0.00149
55037	PTCD3	-0.693854	0.00242079	-1.38667	1.33163e-05	-1.38826	0.00115
114885	OSBPL11	-1.28671	0.000639	-1.46964	0.000139185	-1.39024	3.21e-05
11177	BAZ1A	-1.33268	0.000115	-1.73294	9.77569e-06	-1.39112	6.56e-05
6809	STX3	-0.902523	0.00914687	-1.70898	8.56821e-05	-1.39163	3.31e-05
22828	SCAF8	-2.11805	5.58e-06	-1.21684	9.79629e-05	-1.39347	1.79e-05
79191	IRX3	-1.84667	5.22e-06	-2.11923	1.04939e-06	-1.39366	1.12e-05
23389	MED13L	-2.86846	1.65e-06	-2.81314	7.84113e-07	-1.39627	2.26e-05
55315	SLC29A3	-0.749044	0.00765941	-1.44703	6.06356e-05	-1.39838	0.00011
9728	SECISBP2L	-1.49844	6.97e-05	-1.98537	5.19306e-06	-1.40037	0.000568
55039	TRMT12	-1.69273	8.28e-05	-1.33041	0.0002069	-1.40041	1.65e-05
5994	RFXAP	-2.05982	7.5e-05	-2.29842	1.7513e-05	-1.40093	0.00038
80314	EPC1	-2.41147	5.65e-06	-1.08299	0.000562877	-1.40111	0.000281
8932	MBD2	-0.484684	0.0193877	-0.874133	0.000313051	-1.40281	0.000336
79736	TEFM	-1.37109	0.00015	-2.49573	1.56546e-06	-1.40389	7e-05
168451	THAP5	-1.10095	0.00161703	-1.55512	8.7805e-05	-1.40412	0.000391
400569	MED11	-0.782347	0.0229834	-1.82857	6.59502e-05	-1.40504	4.32e-05
57002	YAE1	-2.2644	0.000878	-1.88302	0.0017246	-1.40608	0.000587
7733	ZNF180	-0.964397	0.00676799	-1.42901	0.000323146	-1.40692	5.04e-05
4288	MKI67	-0.685136	0.00698684	-0.798755	0.00171089	-1.40899	0.00754
283254	HARBI1	-1.4713	0.00464927	-1.17857	0.0110447	-1.40946	7.34e-05
56907	SPIRE1	-2.40295	7.54e-06	-3.259	6.27293e-07	-1.41048	3.97e-05
91768	CABLES1	-2.15518	0.00019	-3.19589	6.98567e-06	-1.4107	5.9e-05
50650	ARHGEF3	-1.05386	0.00787699	-1.25555	0.00169653	-1.41077	0.000123
55930	MYO5C	-0.608583	0.00645561	-0.975657	0.000176044	-1.41094	0.00109
154807	VKORC1L1	-1.56573	0.000658	-1.38524	0.000108597	-1.41114	7.03e-05
4534	MTM1	-1.74554	3.94e-05	-1.57672	3.777e-05	-1.41127	1.4e-05
23469	PHF3	-1.51161	5.4e-05	-0.775005	0.00238875	-1.41268	1.35e-05
205327	C2orf69	-1.42064	9.41e-05	-1.03612	0.000400824	-1.41277	1.21e-05
7372	UMPS	-0.77813	0.00130479	-0.68579	0.00176912	-1.41406	1.01e-05
121536	AEBP2	-2.41903	9.05e-06	-2.59503	2.74889e-06	-1.4147	2.6e-05
26354	GNL3	-0.780793	0.00351571	-0.886435	0.000945148	-1.41592	1.57e-05
113444	SMIM12	-0.912825	0.00178866	-1.34373	7.47606e-05	-1.41624	1.25e-05
9678	PHF14	-0.836515	0.0167034	-1.26877	0.0284763	-1.4165	0.000116
57711	ZNF529	-1.12821	0.00708718	-0.797071	0.030919	-1.41761	0.00184
5586	PKN2	-1.15028	8.52e-05	-1.05884	7.24489e-05	-1.41809	3.16e-05
125228	FAM210A	-1.5593	0.00314415	-2.54345	6.89031e-05	-1.4181	5.75e-05
57630	SH3RF1	-2.35877	0.000322	-2.3716	0.000163995	-1.42457	5.43e-05
9425	CDYL	-3.42744	1.92e-06	-2.16085	1.41099e-05	-1.42543	3.07e-05
219333	USP12	-2.35663	0.000284	-2.50636	9.73462e-05	-1.42599	8.24e-06
8726	EED	-1.13736	0.000173	-1.21939	5.5431e-05	-1.42631	4.24e-05
6314	ATXN7	-2.27895	0.000226	-1.64315	0.00110634	-1.42821	1.82e-05
1602	DACH1	-0.675665	0.0171289	-1.0336	0.000823696	-1.42978	0.00164
9987	HNRNPDL	-1.24625	0.00163347	-2.5656	1.7154e-06	-1.43	4.14e-05
23160	WDR43	-1.53027	0.00017	-1.20565	0.00045082	-1.43027	9.06e-06
65983	GRAMD2B	-1.71432	0.0106116	-2.48558	0.000651847	-1.43083	3.21e-05
23390	ZDHHC17	-2.63859	1.48e-05	-2.89617	4.01052e-06	-1.43175	1.84e-05
55647	RAB20	-1.29142	0.00342317	-1.92933	0.000137514	-1.43599	9.75e-05
324	APC	-1.7376	5.61e-05	-1.82508	1.92935e-05	-1.4366	7e-05
1387	CREBBP	-2.39523	0.000226	-1.74534	0.00120472	-1.4378	8.81e-06
2969	GTF2I	-1.25848	0.000167	-1.51757	2.40128e-05	-1.43906	2.26e-05
55196	KIAA1551	-1.31905	0.00161623	-1.02933	0.00468688	-1.44007	3.45e-05
221178	SPATA13	-1.74125	6.82e-05	-2.65539	2.15017e-06	-1.44054	5.26e-05
90627	STARD13	-1.93518	0.00181162	-2.38525	0.000256906	-1.44057	2.92e-05
57508	INTS2	-1.67267	0.000106	-2.38736	4.92341e-06	-1.44341	9.49e-06
5922	RASA2	-3.4772	4.27e-05	-3.04474	5.0332e-05	-1.44474	2.61e-05
84250	SLF1	-2.45243	6.28e-05	-1.97318	0.000131792	-1.44523	8.81e-06
55320	MIS18BP1	-1.94751	7.36e-05	-2.63642	4.83402e-06	-1.44898	2.43e-05
7465	WEE1	-0.995037	0.000791	-1.16426	0.00211321	-1.45219	1.2e-05
80742	PRR3	-0.830001	0.00330297	-0.890752	0.00128863	-1.45266	7.03e-05
29079	MED4	-1.17988	0.00031	-1.36328	6.15694e-05	-1.45429	8.41e-06
113115	MTFR2	-3.25426	1.13e-05	-2.28632	3.73848e-05	-1.45646	4.92e-05
23269	MGA	-2.31064	1.19e-05	-1.60148	6.54554e-05	-1.45676	0.000156
8899	PRPF4B	-0.815715	0.0120835	-2.86464	1.79871e-05	-1.45849	6.5e-05
51592	TRIM33	-1.57348	1.21e-05	-2.25583	1.96421e-06	-1.46112	9.87e-06
27291	R3HCC1L	-0.880259	0.00284389	-1.50459	0.00525742	-1.46378	3.41e-05
64083	GOLPH3	-1.3161	0.000324	-1.38273	0.000121715	-1.46595	0.000176
4217	MAP3K5	-2.44124	0.000327	-1.82261	0.00130008	-1.47123	0.000212
57512	GPR158	-2.14216	4.35e-05	-3.0481	2.16151e-06	-1.47128	9.77e-05
55773	TBC1D23	-1.28754	0.000733	-1.36474	0.000270355	-1.4715	3.54e-05
6875	TAF4B	-1.42137	0.00111881	-2.18858	3.36172e-05	-1.47189	1.78e-05
267004	PGBD3	-1.44181	0.000451	-1.30245	0.000496466	-1.47249	3.14e-05
79866	BORA	-1.5576	5.93e-05	-0.635942	0.0104211	-1.47593	8.44e-05
64398	MPP5	-1.15397	0.000135	-0.839967	0.000602393	-1.47746	3.09e-05
85464	SSH2	-1.46119	0.0234898	-1.26462	0.0337675	-1.47781	0.000105
1024	CDK8	-2.27441	2.68e-05	-2.28974	1.25815e-05	-1.47792	2.14e-05
57541	ZNF398	-1.12508	0.00217469	-1.19928	0.000853582	-1.47805	3.71e-05
160897	GPR180	-1.64382	0.000515	-2.49593	1.6512e-05	-1.48002	6.42e-05
65979	PHACTR4	-1.79085	0.000123	-2.28834	1.17885e-05	-1.48011	1.51e-05
26098	EDRF1	-1.14759	0.00144413	-1.98946	1.966e-05	-1.48041	1.85e-05
4247	MGAT2	-1.00698	0.000305	-1.36776	2.44486e-05	-1.48168	2.16e-05
23291	FBXW11	-2.3022	3.79e-06	-2.02245	3.76759e-06	-1.48194	4.95e-05
254225	RNF169	-1.27472	0.0098767	-0.885312	0.0440329	-1.48377	6.97e-06
124491	TMEM170A	-1.12655	0.000506	-1.17888	0.000199725	-1.48518	1.94e-05
400566	C17orf97	-1.56879	0.00047	-1.37741	0.000628909	-1.48599	0.00127
6239	RREB1	-3.06167	2.41e-06	-2.1785	7.95694e-06	-1.48695	1.25e-05
57154	SMURF1	-2.826	0.0001	-2.95992	3.55245e-05	-1.49059	0.000274
10243	GPHN	-1.90891	0.000245	-4.84018	4.02421e-07	-1.49096	0.000376
3708	ITPR1	-1.10775	0.0457047	-1.90127	0.00147685	-1.49145	0.000388
1022	CDK7	-1.1241	0.000197	-0.450814	0.0303583	-1.49335	1.2e-05
81930	KIF18A	-3.00782	2.3e-05	-1.80375	0.000362488	-1.49617	0.000416
3097	HIVEP2	-1.7514	0.000528	-1.88786	0.000170069	-1.50415	3.41e-05
25778	DSTYK	-1.16283	0.000288	-0.713515	0.00401908	-1.50434	2.55e-05
55286	C4orf19	-2.05565	1.6e-05	-2.53507	2.10301e-06	-1.50629	5.02e-05
114799	ESCO1	-2.05698	5.6e-06	-0.868033	0.000836487	-1.50777	8.41e-06
10605	PAIP1	-1.62969	0.00248528	-2.37894	0.000111684	-1.50907	0.000114
25972	UNC50	-0.73235	0.00917865	-1.51461	4.77331e-05	-1.5094	1.95e-05
148213	ZNF681	-1.71916	0.00129775	-1.38989	0.00303874	-1.51214	2.6e-05
8500	PPFIA1	-2.68308	5.57e-05	-1.88053	0.000301673	-1.51765	1.84e-05
55813	UTP6	-1.3422	8.84e-05	-1.20767	8.71902e-05	-1.52191	9.74e-05
5914	RARA	-3.51623	1.13e-06	-1.89741	1.65378e-05	-1.52296	6.9e-05
51524	TMEM138	-1.45324	0.000199	-0.99086	0.00140162	-1.52658	9.06e-06
22856	CHSY1	-2.02989	8.09e-06	-1.65223	1.43498e-05	-1.52773	1.77e-05
221079	ARL5B	-0.810654	0.0265119	-0.832465	0.0161307	-1.52891	1.19e-05
55909	BIN3	-1.1859	0.00436915	-0.698116	0.0490043	-1.53153	0.000121
55125	CEP192	-2.56082	7.58e-06	-2.27953	7.36824e-06	-1.53315	5.39e-05
56937	PMEPA1	-1.2484	0.00217119	-0.975209	0.00619385	-1.53455	5.52e-05
7644	ZNF91	-3.41934	7.5e-06	-3.17963	5.33111e-06	-1.53564	0.000278
54821	ERCC6L	-1.03351	0.00538786	-1.16675	0.0015715	-1.53592	2.01e-05
51363	CHST15	-4.30494	1.41e-06	-4.23467	6.43278e-07	-1.53672	1.65e-05
26046	LTN1	-1.41671	0.000392	-1.66097	7.08492e-05	-1.54175	3.81e-05
5981	RFC1	-1.58158	0.000273	-2.10154	2.08965e-05	-1.54186	7.56e-06
79572	ATP13A3	-0.690288	0.0171331	-2.11047	7.58783e-06	-1.5438	2.54e-05
9743	ARHGAP32	-1.48057	0.0103744	-1.84498	0.00174619	-1.553	0.000255
9969	MED13	-1.53617	0.000138	-1.75508	7.68254e-05	-1.55603	2.56e-05
85461	TANC1	-4.07222	2.77e-07	-4.61745	6.40615e-08	-1.55715	8.56e-05
2625	GATA3	-2.51833	1.33e-06	-1.86773	4.82144e-06	-1.56172	1.9e-05
22841	RAB11FIP2	-1.62211	0.00220154	-2.05763	0.000260636	-1.56178	0.000144
55355	HJURP	-2.74943	2.9e-06	-1.164	0.000367034	-1.56277	1.23e-05
8897	MTMR3	-1.93639	9.43e-06	-1.13567	0.000158489	-1.56507	0.000121
5495	PPM1B	-1.08954	0.000584	-0.921195	0.00100906	-1.56829	5.13e-05
100132406	NBPF10	-0.598677	0.00884799	-0.528988	0.0118774	-1.56894	1.24e-05
54764	ZRANB1	-1.49993	0.000137	-1.02202	0.000771951	-1.56915	1.02e-05
23239	PHLPP1	-2.93721	1e-05	-3.21266	2.73345e-06	-1.57148	0.000139
57649	PHF12	-1.65204	0.000576	-1.23869	0.00217816	-1.57245	6.32e-05
55609	ZNF280C	-1.94962	0.000451	-1.18698	0.00635625	-1.57412	5.64e-05
57799	RAB40C	-1.77985	0.00018	-1.42131	0.000434515	-1.57604	1.87e-05
9493	KIF23	-1.80889	3.62e-05	-0.917263	0.00176308	-1.58052	8.53e-06
23024	PDZRN3	-1.44594	0.000118	-1.89424	9.61813e-06	-1.58362	5.84e-05
9440	MED17	-1.88434	0.000753	-1.78534	0.00060653	-1.58405	1.2e-05
9683	N4BP1	-2.06682	0.000247	-1.01273	0.0129618	-1.58574	3.87e-05
8161	COIL	-1.21747	0.00129057	-1.41454	1.46324e-05	-1.58618	2.54e-05
93166	PRDM6	-2.37134	0.000166	-3.201	1.12974e-05	-1.59325	0.000197
84057	MND1	-1.55811	0.000997	-2.02855	9.14381e-05	-1.59339	3.02e-05
5638	PRRG1	-1.28098	0.00035	-1.64357	3.43876e-05	-1.59367	5.72e-05
23219	FBXO28	-2.7597	1.97e-05	-1.26615	0.00186608	-1.5963	7.39e-06
200424	TET3	-1.95318	5.48e-05	-1.44878	0.00019846	-1.59661	4.01e-05
28512	NKIRAS1	-1.35134	0.00044	-1.34478	0.000245976	-1.59877	3.55e-05
1942	EFNA1	-1.0325	0.015337	-1.78302	0.000310512	-1.59946	2.39e-05
162239	ZFP1	-2.17723	8.05e-06	-1.1673	0.000238599	-1.59953	7.41e-06
253260	RICTOR	-2.14912	1.44e-05	-3.82143	1.81087e-06	-1.60245	3.45e-05
5142	PDE4B	-1.5469	0.00240709	-1.60715	0.00113188	-1.60312	4.14e-05
4214	MAP3K1	-2.32642	0.00014	-2.21358	9.79261e-05	-1.60741	1.03e-05
388552	BLOC1S3	-1.35559	0.00117381	-2.15854	2.81504e-05	-1.60789	0.000147
22944	KIN	-3.61894	1.04e-05	-2.01953	0.000253666	-1.61038	1.86e-05
92935	MARS2	-2.21936	2.65e-05	-3.65087	6.43278e-07	-1.6106	0.000356
29923	HILPDA	-0.916274	0.00061	-2.03422	1.7102e-06	-1.61116	0.000219
54477	PLEKHA5	-2.6133	1.78e-05	-2.98236	3.72413e-06	-1.6113	4.72e-05
23198	PSME4	-1.83855	0.0004	-3.11055	6.32086e-06	-1.61455	0.000166
3717	JAK2	-2.35136	2.42e-05	-2.97832	2.63614e-06	-1.61666	8.3e-05
7403	KDM6A	-2.70719	1.41e-05	-2.88135	4.60009e-06	-1.61681	5.19e-06
57695	USP37	-2.44582	2.11e-05	-2.12165	2.64916e-05	-1.62183	5.96e-05
2863	GPR39	-2.16792	0.000102	-1.8903	0.000124338	-1.62299	3.21e-05
83860	TAF3	-1.83004	0.00079	-1.90407	0.000334657	-1.62365	3.34e-05
58508	KMT2C	-3.67632	1.46e-06	-4.28475	2.42031e-07	-1.62616	0.000364
124790	HEXIM2	-1.1102	0.0100048	-0.98536	0.0130533	-1.62803	8.98e-05
55617	TASP1	-2.5711	1.64e-05	-3.80104	7.73849e-07	-1.6304	7.41e-06
6497	SKI	-1.57394	0.000875	-1.55434	8.42804e-05	-1.63242	7.63e-06
56913	C1GALT1	-0.975379	0.000834	-1.70421	1.06452e-05	-1.63582	2.98e-05
51422	PRKAG2	-1.48605	0.000317	-2.5553	4.52362e-06	-1.63722	2.48e-05
65056	GPBP1	-1.88228	2.79e-05	-2.26549	9.99215e-05	-1.64098	6.33e-06
84085	FBXO30	-1.6948	0.00127221	-1.39432	0.00266364	-1.64365	0.000133
7707	ZNF148	-1.65793	1.24e-05	-1.51567	0.000363513	-1.64379	6.74e-05
54726	OTUD4	-1.96097	2.83e-05	-1.44187	0.000109025	-1.64452	4.27e-05
23379	ICE1	-1.52789	1.98e-05	-0.724468	0.00151682	-1.64693	1.8e-05
10560	SLC19A2	-2.08411	0.000151	-2.58875	1.79179e-05	-1.64778	5.02e-05
10845	CLPX	-1.54674	4.21e-05	-1.2196	9.99215e-05	-1.65194	6.66e-06
113510	HELQ	-1.33105	0.0105318	-1.45636	0.00405631	-1.65221	8.74e-06
55628	ZNF407	-2.3294	0.000178	-2.50416	5.58625e-05	-1.65488	0.000176
4850	CNOT4	-2.17663	9.05e-05	-1.74956	0.000194968	-1.65673	1.78e-05
115	ADCY9	-2.73527	0.000185	-5.47514	1.08892e-06	-1.65705	2.7e-05
23195	MDN1	-0.975084	0.027269	-1.64825	0.000779267	-1.65999	2.77e-05
54438	GFOD1	-1.83799	0.000327	-1.56626	0.000532332	-1.66026	4.92e-05
83690	CRISPLD1	-2.10654	6.82e-05	-3.99833	6.40099e-07	-1.66064	0.000253
9120	SLC16A6	-2.6999	5.59e-05	-1.88327	5.7142e-05	-1.66097	0.000207
57614	RELCH	-1.83918	0.000284	-2.03093	7.61219e-05	-1.6674	2.21e-05
57325	KAT14	-0.685344	0.0366469	-1.02285	0.00263806	-1.66884	7.8e-05
8604	SLC25A12	-2.43865	1.13e-05	-3.27745	9.30508e-07	-1.67314	7.41e-06
23189	KANK1	-0.71796	0.0288085	-1.12675	0.00138592	-1.67342	6.66e-06
25852	ARMC8	-1.5236	8.14e-05	-2.94921	3.84429e-06	-1.67523	0.000432
8660	IRS2	-2.15054	1.96e-05	-0.920747	0.00287228	-1.67663	3.87e-05
8455	ATRN	-1.71376	0.0250132	-2.85273	0.000769135	-1.67828	0.00123
8732	RNGTT	-2.92843	1.64e-05	-3.84056	9.42058e-07	-1.68193	8.53e-06
51232	CRIM1	-1.32427	0.00597086	-2.10133	0.00017176	-1.68219	0.000135
64419	MTMR14	-0.65659	0.023922	-0.822671	0.00455445	-1.68329	0.00395
5291	PIK3CB	-1.85287	0.000187	-2.69369	7.83881e-06	-1.68406	2.57e-05
151987	PPP4R2	-1.85838	5.47e-05	-1.88307	0.000422806	-1.68443	4.83e-06
8554	PIAS1	-1.96561	4.1e-05	-2.08909	1.32665e-05	-1.68584	2.21e-05
4215	MAP3K3	-1.12968	0.0189334	-1.70026	0.00104286	-1.68608	7.64e-06
23067	SETD1B	-2.15474	5.26e-06	-1.37044	4.57924e-05	-1.68755	7.38e-05
54838	WBP1L	-1.36553	0.000106	-1.11743	0.000204281	-1.69011	4.91e-06
27340	UTP20	-0.838291	0.0023062	-2.39333	1.35252e-06	-1.69166	1.2e-05
55252	ASXL2	-1.92206	0.000568	-2.49253	5.22688e-05	-1.69792	0.000117
84920	ALG10	-0.926923	0.0104593	-2.14645	0.000946439	-1.69881	5.73e-05
6790	AURKA	-2.57673	1.48e-06	-1.59978	1.11879e-05	-1.69921	4.2e-06
9443	MED7	-1.21362	8.43e-05	-1.92832	3.60554e-06	-1.69935	4.31e-05
129401	NUP35	-2.73815	3.9e-06	-2.40551	3.8539e-06	-1.70101	1.72e-05
7639	ZNF85	-1.48872	8.52e-05	-0.483271	0.0442015	-1.70301	8.63e-06
65986	ZBTB10	-2.38301	0.000205	-2.68238	4.70178e-05	-1.70433	0.000849
121512	FGD4	-3.22327	1.26e-05	-3.7169	2.53688e-06	-1.70603	8.36e-06
29072	SETD2	-2.03067	7.92e-05	-2.08377	3.23911e-05	-1.70701	8.76e-06
25841	ABTB2	-1.20468	0.00906885	-1.21534	0.00562824	-1.71678	0.000276
323	APBB2	-2.27358	5.27e-06	-2.51547	1.32583e-06	-1.72601	5.03e-05
58517	RBM25	-2.45375	1.83e-05	-2.68328	9.42058e-07	-1.72913	1.11e-05
23515	MORC3	-1.69317	0.00027	-1.16062	0.001849	-1.73145	0.000686
22850	ADNP2	-2.25411	7.21e-06	-1.38571	8.16092e-05	-1.73238	6.28e-05
145270	PRIMA1	-2.19201	0.000248	-3.16882	1.08872e-05	-1.7325	6.6e-05
3298	HSF2	-1.6152	0.00254236	-1.82906	0.000668073	-1.73307	1.94e-05
79960	JADE1	-2.01312	0.000138	-0.855687	0.0171474	-1.734	6.61e-06
85025	TMEM60	-0.91572	0.0013244	-2.85511	5.31989e-07	-1.73547	2.1e-05
286826	LIN9	-1.83725	7.92e-05	-1.46666	0.000177997	-1.73579	6.27e-06
114825	PWWP2A	-1.49869	0.00176358	-1.36629	0.00192795	-1.73637	4.2e-06
84285	EIF1AD	-1.19854	0.0011134	-1.28364	0.000401575	-1.74061	0.000609
9958	USP15	-2.16783	2.75e-05	-1.74198	5.85374e-05	-1.74269	8.64e-06
23271	CAMSAP2	-2.01421	4.09e-05	-2.21475	1.05739e-05	-1.74282	1.56e-05
3949	LDLR	-4.08004	1.13e-06	-2.22664	1.52853e-05	-1.7445	3.07e-05
6655	SOS2	-2.12107	0.00158689	-1.72567	0.000385024	-1.7448	0.000153
6744	ITPRID2	-0.911261	0.0130306	-1.1193	0.00248668	-1.74508	0.000165
79833	GEMIN6	-1.27089	0.000222	-1.80523	1.07604e-05	-1.74737	5.92e-06
23405	DICER1	-1.10284	0.000852	-2.37811	2.79823e-06	-1.7502	4.6e-05
2186	BPTF	-1.20451	0.000215	-2.123	0.000160261	-1.75141	2.78e-05
22807	IKZF2	-1.59818	0.00255304	-2.04661	0.000286958	-1.75264	2.18e-05
58486	ZBED5	-2.82456	2.85e-06	-2.67984	1.71357e-06	-1.75663	1.52e-05
23232	TBC1D12	-2.63952	2.61e-06	-2.82985	7.92236e-07	-1.76026	8.76e-06
9585	KIF20B	-1.65539	0.000226	-2.73791	4.157e-06	-1.76036	0.000157
148304	C1orf74	-1.37231	0.000955	-1.28344	0.000862174	-1.76223	2.21e-05
123169	LEO1	-1.46805	2.18e-05	-0.989442	0.000151934	-1.76288	6.91e-06
57584	ARHGAP21	-1.15555	0.0014943	-1.20127	0.000672213	-1.76325	0.000134
7582	ZNF33B	-1.66772	0.00231768	-1.33824	0.00559745	-1.77185	3.54e-05
2131	EXT1	-2.65037	7.41e-06	-3.25805	9.89457e-07	-1.7745	7.42e-06
154043	CNKSR3	-2.02779	2.52e-05	-1.49554	9.41364e-05	-1.77636	0.000564
1997	ELF1	-2.07354	4.21e-06	-1.51897	1.37711e-05	-1.78064	2.1e-05
3658	IREB2	-2.31556	3.65e-05	-3.30166	1.81087e-06	-1.78475	6.93e-06
4088	SMAD3	-1.54683	9.41e-05	-1.70039	2.41009e-05	-1.7891	7.48e-06
7204	TRIO	-0.990314	0.00246199	-1.48946	9.03813e-05	-1.79069	5.02e-05
6400	SEL1L	-1.26551	0.000375	-1.11324	0.00123808	-1.79077	8.74e-06
55092	TMEM51	-2.02595	0.00027	-2.17142	8.72664e-05	-1.79125	1.6e-05
84056	KATNAL1	-2.99906	5.32e-05	-2.78276	4.19443e-05	-1.79307	0.000384
55667	DENND4C	-2.35961	4.21e-05	-2.335	2.16814e-05	-1.79409	0.000104
79977	GRHL2	-4.25864	1.13e-06	-3.35883	1.4629e-06	-1.79684	5.24e-05
58489	ABHD17C	-0.919292	0.0109926	-1.67229	0.000140935	-1.79782	8.42e-06
51010	EXOSC3	-1.28314	0.000126	-1.7953	1.9555e-05	-1.80853	0.000108
116984	ARAP2	-1.23444	0.00692969	-1.43399	0.00173524	-1.81523	7.15e-06
57396	CLK4	-1.45938	0.00847793	-2.27652	0.000297479	-1.81624	6.93e-06
5029	P2RY2	-2.40082	6.16e-05	-3.79187	1.59621e-06	-1.81873	6.1e-05
4091	SMAD6	-2.20738	1.01e-05	-2.53222	2.07845e-06	-1.82458	0.000119
55094	GPATCH1	-2.4642	9.76e-06	-3.02785	1.35252e-06	-1.82808	0.000125
9698	PUM1	-3.58356	1.32e-06	-2.5154	8.78859e-07	-1.82853	3.52e-05
63920	ZBED8	-1.93926	0.000957	-1.89272	0.000644997	-1.83626	8.53e-06
2960	GTF2E1	-1.27061	0.000124	-1.16919	0.000106791	-1.84436	3.59e-06
57552	NCEH1	-0.815554	0.0476044	-2.59635	2.33282e-05	-1.8451	0.000272
8454	CUL1	-1.71628	2.72e-05	-1.32058	7.70789e-05	-1.84717	1e-05
55291	PPP6R3	-1.27058	6.14e-05	-1.3277	2.20005e-05	-1.8519	2.59e-05
57700	FAM160B1	-3.42348	4.9e-05	-3.59309	1.70538e-05	-1.85248	0.000255
92	ACVR2A	-2.76683	0.000996	-1.74956	0.00521261	-1.85622	9.33e-06
7088	TLE1	-2.94679	5.54e-06	-2.04199	2.73811e-05	-1.85727	9.88e-05
2908	NR3C1	-1.72926	9.5e-06	-2.45242	3.75089e-06	-1.86112	9.92e-06
81573	ANKRD13C	-2.16851	0.000196	-2.34581	4.84872e-05	-1.86128	4.4e-05
51455	REV1	-2.05157	5.74e-05	-2.18584	1.80639e-05	-1.86174	7.41e-06
26030	PLEKHG3	-1.15058	0.0107158	-1.34995	0.00265115	-1.87326	0.000167
57532	NUFIP2	-1.01296	0.0008	-0.613498	0.0051073	-1.87523	7.48e-06
158358	KIAA2026	-1.75933	0.0024542	-2.23671	0.000288794	-1.87569	1.84e-05
80746	TSEN2	-2.18761	2.79e-06	-3.33434	1.36506e-07	-1.88025	2.41e-05
133015	PACRGL	-0.924637	0.00788704	-0.640918	0.0369875	-1.88313	7.72e-06
8139	GAN	-0.818429	0.0359996	-1.09468	0.00511402	-1.88358	1.35e-05
55084	SOBP	-2.14941	0.000135	-3.6417	2.15076e-06	-1.88396	5.18e-05
26524	LATS2	-2.11466	5.71e-05	-0.907733	0.00117968	-1.88574	6.93e-06
8613	PLPP3	-1.11281	0.00947529	-0.992604	0.00446024	-1.88803	2.41e-05
23064	SETX	-2.09364	6.82e-05	-2.00084	4.49656e-05	-1.89119	7.05e-05
8503	PIK3R3	-1.5979	8.66e-05	-1.60196	4.13122e-05	-1.89579	4.23e-06
55366	LGR4	-2.26034	6.29e-06	-2.22475	3.23205e-06	-1.89988	1.84e-05
899	CCNF	-3.33722	4.53e-05	-2.86252	6.17564e-05	-1.90046	1.72e-05
22887	FOXJ3	-3.25219	1.89e-06	-1.29143	0.000317293	-1.90456	7.15e-06
861	RUNX1	-2.5132	4.34e-05	-2.17543	5.58723e-05	-1.90907	1.99e-05
55802	DCP1A	-2.34258	6.47e-05	-0.914633	0.0143306	-1.91113	1.99e-05
113263	GLCCI1	-2.50578	1.02e-05	-3.28398	9.70911e-07	-1.91569	1.01e-05
10714	POLD3	-2.29064	7.48e-06	-1.74227	2.0117e-05	-1.92015	3.13e-06
25942	SIN3A	-3.153	1.25e-06	-1.80565	1.29776e-05	-1.92056	2.71e-06
160760	PPTC7	-1.26731	8.13e-05	-0.956396	0.000271009	-1.92117	4.29e-06
10926	DBF4	-1.37282	9.61e-05	-0.694854	0.0045085	-1.92273	4.7e-06
57147	SCYL3	-1.43622	0.00026	-1.38395	0.000174284	-1.92329	7.78e-05
55775	TDP1	-1.11967	0.00015	-2.63533	4.02421e-07	-1.92382	2.32e-05
7549	ZNF2	-0.677113	0.027661	-1.45579	0.000150305	-1.9252	9.57e-06
166968	MIER3	-1.37743	0.000103	-0.587473	0.0130332	-1.92623	1.82e-05
23116	TOGARAM1	-1.45384	0.00376788	-2.56341	4.99778e-05	-1.93451	7.08e-06
10527	IPO7	-1.49897	0.000791	-2.68652	8.55983e-06	-1.93525	4.83e-06
4863	NPAT	-1.96109	0.000952	-2.26206	0.000200143	-1.94117	6.27e-06
11218	DDX20	-0.773665	0.0140719	-1.08755	0.00113682	-1.9483	7.21e-06
168374	ZNF92	-1.04088	0.00208105	-1.08616	0.000941899	-1.9521	0.000187
221037	JMJD1C	-3.03692	4.44e-06	-2.62673	4.96798e-06	-1.95248	5.5e-06
7110	TMF1	-1.72869	0.00268717	-2.00693	0.000599438	-1.9525	4.69e-05
10892	MALT1	-1.29372	0.000287	-2.89542	8.77162e-07	-1.96609	8.05e-06
23266	ADGRL2	-2.28917	0.0002	-2.82599	2.4442e-05	-1.96656	9.27e-05
10181	RBM5	-1.87808	0.000123	-1.12337	0.00199682	-1.96791	8.42e-06
11011	TLK2	-3.45193	1.59e-06	-1.9262	2.44756e-05	-1.96814	1.2e-05
57120	GOPC	-0.853629	0.0013176	-1.34535	0.000836332	-1.96881	4.2e-06
262	AMD1	-1.74347	1.26e-05	-1.92973	3.23205e-06	-1.96955	3.83e-06
57496	MRTFB	-2.41499	3.14e-06	-3.2332	3.28389e-07	-1.97367	9.61e-06
163081	ZNF567	-1.41252	0.00319955	-0.963001	0.0189244	-1.97775	2.16e-05
25816	TNFAIP8	-0.84011	0.0174366	-1.67162	0.00013658	-1.98057	9.02e-05
889	KRIT1	-2.32003	4.86e-06	-4.25301	8.29735e-08	-1.98392	6.18e-05
56929	FEM1C	-1.45005	0.00131686	-1.28679	0.00171122	-1.9907	6.66e-06
57690	TNRC6C	-1.95719	0.00042	-2.4893	4.39974e-05	-1.99167	6.93e-06
56888	KCMF1	-1.88278	7.19e-05	-1.83532	4.15984e-05	-1.99191	0.00151
340252	ZNF680	-3.09582	6.76e-06	-3.15746	2.75188e-06	-1.99695	2.89e-05
55636	CHD7	-2.92513	5.57e-06	-3.10717	1.76539e-06	-1.99915	6.59e-05
55703	POLR3B	-2.69609	2.61e-06	-3.18416	4.78951e-07	-2.00487	3.92e-06
25805	BAMBI	-2.33249	2.79e-06	-2.58743	6.90513e-07	-2.00555	2.17e-06
51735	RAPGEF6	-5.18974	1.33e-06	-5.47227	4.23737e-07	-2.00572	1.99e-05
23060	ZNF609	-2.24341	6.11e-05	-2.26312	2.7686e-05	-2.01486	3.47e-06
85462	FHDC1	-1.1362	0.00052	-1.22438	0.000167509	-2.01605	3.91e-05
9733	SART3	-1.76606	4.12e-05	-0.733654	0.00688236	-2.02167	3.92e-06
7326	UBE2G1	-2.1823	1.07e-05	-2.20147	2.12917e-05	-2.02224	2.34e-06
7543	ZFX	-1.55989	0.000462	-1.75969	0.00203032	-2.02394	9.4e-05
55552	ZNF823	-2.17754	0.000239	-2.34811	7.39855e-05	-2.03024	7.17e-05
79170	PRR15L	-1.84332	0.00847693	-3.22516	0.000133293	-2.0303	3.83e-06
8772	FADD	-1.52457	0.000106	-1.71071	2.39103e-05	-2.03399	4.79e-06
5597	MAPK6	-1.44906	4.95e-05	-0.599361	0.00823768	-2.03721	1.1e-05
55814	BDP1	-2.80418	3.68e-05	-3.78369	2.61167e-06	-2.04099	4.12e-06
4092	SMAD7	-2.09902	0.000495	-2.75074	4.23695e-05	-2.0446	2.52e-05
8412	BCAR3	-1.87154	0.000226	-2.42055	2.02351e-05	-2.04991	6.99e-05
3673	ITGA2	-2.20201	1.28e-05	-2.98238	9.88704e-07	-2.05387	1.2e-05
57210	SLC45A4	-2.23748	0.000886	-2.51031	0.000225455	-2.05558	1.41e-05
5326	PLAGL2	-1.71651	0.0106098	-2.24491	0.00130882	-2.05616	0.000204
6018	RLF	-2.59042	1.86e-05	-1.69045	0.000158956	-2.07125	1.03e-05
54877	ZCCHC2	-2.7378	1.74e-06	-3.57197	1.98394e-07	-2.07496	5.22e-06
10179	RBM7	-1.73613	4.32e-05	-1.31897	0.000133014	-2.07537	1.84e-05
83479	DDX59	-1.53271	5.36e-05	-1.15863	0.000170655	-2.0757	1.2e-05
23240	TMEM131L	-1.33135	0.0194683	-1.37195	0.0113212	-2.07714	6.29e-06
57178	ZMIZ1	-2.79255	4.86e-06	-2.79883	2.17092e-06	-2.07836	7.66e-06
1131	CHRM3	-2.80422	2.42e-05	-2.86605	1.02462e-05	-2.08153	1.3e-05
64921	CASD1	-1.84334	0.00026	-1.98766	8.04989e-05	-2.08233	7.41e-06
26058	GIGYF2	-3.00691	3.02e-06	-3.57105	5.31989e-07	-2.08493	2.45e-05
55109	AGGF1	-2.41855	9.76e-06	-2.36838	5.28528e-06	-2.09977	3.59e-06
126074	SWSAP1	-1.05663	0.00253363	-2.58464	3.76759e-06	-2.10053	0.000118
54545	MTMR12	-1.78764	3.77e-05	-1.93935	1.06661e-05	-2.1103	8.36e-05
23174	ZCCHC14	-1.76849	1.44e-05	-2.13314	2.15076e-06	-2.11551	4.37e-06
4040	LRP6	-3.55246	2.19e-05	-3.36379	1.55165e-05	-2.11897	0.000222
85415	RHPN2	-3.96919	1.35e-05	-4.10299	5.22849e-06	-2.12086	3.03e-06
259230	SGMS1	-2.51124	0.000593	-3.13797	6.98367e-05	-2.13052	1.17e-05
9816	URB2	-1.98719	3.42e-05	-1.2294	0.000438115	-2.13057	8.53e-06
23063	WAPL	-2.14549	4.07e-06	-2.28466	5.07885e-06	-2.13123	3.32e-06
196528	ARID2	-3.48252	3.94e-05	-3.77561	4.8163e-06	-2.13738	2.7e-06
54439	RBM27	-2.47659	1.27e-06	-1.54897	7.83881e-06	-2.14971	7.64e-06
23013	SPEN	-1.58708	0.000149	-1.57596	7.90121e-05	-2.15061	4.62e-05
7272	TTK	-2.27022	4.34e-05	-2.11233	3.41754e-05	-2.15838	6.35e-06
55958	KLHL9	-0.936408	0.000861	-1.60384	1.26154e-05	-2.16315	9.61e-06
9712	USP6NL	-1.87115	0.000396	-1.89959	0.0001916	-2.16366	3.5e-06
6433	SFSWAP	-1.65474	0.000156	-1.71652	6.25173e-05	-2.16405	6.97e-06
26084	ARHGEF26	-2.5627	2.08e-06	-4.31754	6.40615e-08	-2.16542	2.34e-06
55105	GPATCH2	-2.62212	6.79e-05	-3.22684	3.54961e-05	-2.16989	5.26e-06
26035	GLCE	-0.734557	0.032294	-2.01535	3.57232e-05	-2.17523	1.79e-05
4170	MCL1	-1.22901	0.000224	-1.4493	3.74031e-05	-2.18011	6.99e-06
84919	PPP1R15B	-2.01572	4.86e-06	-2.32741	9.64893e-07	-2.19237	3.32e-06
8289	ARID1A	-2.47263	4.3e-06	-1.08959	0.000441756	-2.19621	2.03e-06
83548	COG3	-2.19597	4.23e-05	-2.66004	5.75678e-06	-2.19797	1.86e-05
10124	ARL4A	-1.77881	3.85e-05	-1.83531	1.52853e-05	-2.19839	4.02e-06
10042	HMGXB4	-2.22554	6.59e-06	-2.80466	8.19401e-07	-2.19994	1.18e-05
7048	TGFBR2	-1.68203	0.00101212	-2.40965	4.91461e-05	-2.20215	0.000324
83990	BRIP1	-1.95742	0.00073	-3.31372	1.12132e-05	-2.20392	8.8e-06
2737	GLI3	-1.79313	0.00129057	-2.49002	7.84023e-05	-2.20421	1.61e-05
285172	FAM126B	-2.91427	4.88e-05	-3.79799	4.15832e-06	-2.20545	0.000116
79666	PLEKHF2	-2.97928	5.29e-06	-3.00086	2.31244e-06	-2.20891	6.89e-06
9819	TSC22D2	-0.914494	0.00465856	-1.13754	0.000698011	-2.20982	2.1e-06
7775	ZNF232	-1.76151	0.000945	-1.43808	0.0020778	-2.21234	8.53e-06
80312	TET1	-2.20245	0.000392	-2.21397	0.000202352	-2.21652	2.61e-05
596	BCL2	-3.3138	9.11e-07	-5.25206	2.73402e-08	-2.22937	1.85e-06
84437	MSANTD4	-2.1118	0.00042	-0.906258	0.00715593	-2.23	7.47e-06
22884	WDR37	-2.5111	8.61e-05	-2.13861	0.000123611	-2.23807	9.75e-05
64768	IPPK	-1.7401	0.00026	-2.10569	3.69195e-05	-2.23852	9.33e-06
7562	ZNF708	-1.16686	0.00219454	-1.49762	0.000238903	-2.2422	0.000274
8829	NRP1	-0.879208	0.0392773	-4.27289	1.23567e-06	-2.24246	1e-05
57688	ZSWIM6	-4.30751	4.43e-06	-4.3332	1.94348e-06	-2.24393	2.01e-06
55183	RIF1	-2.63746	2.66e-06	-2.65592	1.1405e-06	-2.25607	3.48e-06
51174	TUBD1	-2.96661	1.95e-06	-3.62715	3.28389e-07	-2.25737	1.12e-05
463	ZFHX3	-2.67839	0.000175	-4.43808	3.18844e-06	-2.25995	4.17e-05
84146	ZNF644	-2.65793	6.42e-06	-1.20391	0.000598455	-2.2637	4.8e-06
6416	MAP2K4	-1.51339	0.00621624	-2.35083	0.000208178	-2.26383	1.09e-05
9044	BTAF1	-3.46908	6.57e-05	-3.80052	1.71882e-05	-2.264	5.52e-05
5295	PIK3R1	-1.91842	0.000224	-2.05904	7.0744e-05	-2.2672	2.34e-06
11228	RASSF8	-3.93668	7.94e-06	-2.05088	0.000286319	-2.26747	2.7e-06
9972	NUP153	-2.90116	6e-07	-2.59356	4.45112e-07	-2.27316	2.03e-06
80205	CHD9	-3.30021	7e-06	-3.2547	3.55997e-06	-2.27462	6.89e-06
51585	PCF11	-1.31925	0.000152	-0.82672	0.00187463	-2.27881	1.84e-05
54521	WDR44	-1.92544	0.00104277	-2.31952	0.000163226	-2.27967	1.31e-05
4216	MAP3K4	-1.92438	9.05e-06	-2.40145	1.14401e-06	-2.2838	1.52e-05
79660	PPP1R3B	-3.16258	4.33e-05	-3.04308	2.70093e-05	-2.31298	6.06e-06
890	CCNA2	-1.50603	0.000177	-2.54239	2.82476e-06	-2.31606	1.71e-05
55917	CTTNBP2NL	-2.27752	3.6e-05	-1.52933	0.000259048	-2.31881	2.41e-06
56916	SMARCAD1	-2.56972	7.75e-06	-2.03698	1.62966e-05	-2.32453	4.87e-06
9849	ZNF518A	-2.40216	0.0005	-1.60399	0.00399713	-2.32469	2.1e-06
4690	NCK1	-3.53288	1.57e-06	-1.79985	4.45734e-05	-2.32885	3.32e-06
147339	C18orf25	-1.65458	6.68e-05	-0.707244	0.00885086	-2.33292	6.07e-05
1876	E2F6	-2.0901	0.000299	-2.08369	0.000160668	-2.33576	3.45e-06
7227	TRPS1	-2.48551	3.93e-06	-2.20619	3.71423e-06	-2.33598	2.54e-05
5509	PPP1R3D	-1.43145	0.00994396	-1.90798	0.00106127	-2.34363	6.95e-05
64919	BCL11B	-3.10435	6.31e-05	-2.23938	2.29224e-05	-2.34634	0.000118
64225	ATL2	-1.7144	1.22e-05	-1.18202	7.00591e-05	-2.35953	1.53e-06
199692	ZNF627	-2.5064	2.79e-06	-1.3612	6.32176e-05	-2.36519	6.66e-06
255488	RNF144B	-2.13794	0.000598	-2.15336	0.000310912	-2.36898	9.64e-06
56342	PPAN	-1.8228	0.00016	-1.71357	0.0001236	-2.38569	1.85e-06
10818	FRS2	-1.40583	0.000145	-1.29542	0.000127839	-2.40229	3.43e-06
79142	PHF23	-1.86069	2.37e-05	-1.52736	4.32717e-05	-2.40316	1.69e-06
23035	PHLPP2	-1.95713	2.78e-05	-1.71511	3.30253e-05	-2.4048	2.43e-05
1948	EFNB2	-1.35775	0.000103	-1.84213	6.61361e-06	-2.41674	1.94e-06
27	ABL2	-2.54275	4.88e-05	-1.89723	0.000169562	-2.41684	1.85e-06
260425	MAGI3	-2.14596	0.0078729	-2.81988	0.000884639	-2.41695	2.41e-05
80204	FBXO11	-2.89889	1.02e-05	-1.87895	8.81809e-05	-2.42413	1.37e-06
9655	SOCS5	-2.57084	5.54e-05	-2.70183	1.89357e-05	-2.4262	1.4e-05
148867	SLC30A7	-1.57402	0.000798	-2.69893	1.13927e-05	-2.44123	1.96e-05
23036	ZNF292	-2.01592	5.35e-05	-2.51667	2.12193e-05	-2.44184	3.12e-05
55731	FAM222B	-1.53197	0.000215	-1.359	0.000251279	-2.45397	1.85e-06
10184	LHFPL2	-1.61277	0.000866	-0.952565	0.0134244	-2.45788	4.26e-05
55294	FBXW7	-1.09369	0.0411893	-2.47511	0.000188644	-2.46439	4.24e-06
23394	ADNP	-2.66035	1.32e-06	-1.79779	5.05239e-06	-2.47142	1.74e-06
81607	NECTIN4	-0.862601	0.00817433	-2.22225	9.56706e-06	-2.48217	0.000362
55051	NRDE2	-1.51921	0.00289689	-1.90246	0.000387483	-2.48985	2.1e-06
5128	CDK17	-3.45952	4.34e-06	-2.57143	1.3056e-05	-2.49071	1.2e-05
22943	DKK1	-2.98184	4.82e-07	-2.74196	3.38497e-07	-2.49526	1.37e-06
9258	MFHAS1	-1.24494	9.61e-05	-2.50543	6.27293e-07	-2.49689	0.000123
151903	CCDC12	-2.8072	2.27e-06	-2.53859	1.67153e-06	-2.50053	1.89e-06
4848	CNOT2	-2.03964	8.58e-06	-1.28647	3.59253e-05	-2.50684	2.08e-06
54891	INO80D	-2.49809	3.93e-05	-2.42737	2.30726e-05	-2.52156	8.17e-05
10678	B3GNT2	-2.27248	0.000303	-2.36448	0.000120681	-2.53602	0.000128
200576	PIKFYVE	-2.95253	0.00027	-3.38429	5.62497e-05	-2.5452	8.15e-06
64778	FNDC3B	-4.53012	1.25e-06	-4.8275	3.47411e-07	-2.56077	6.98e-05
29110	TBK1	-1.76212	5.84e-05	-2.06745	9.79546e-06	-2.5617	3.83e-06
22954	TRIM32	-1.21976	0.00115805	-2.97836	1.76539e-06	-2.5624	7.71e-06
7994	KAT6A	-3.26788	1.2e-05	-2.38216	4.73602e-05	-2.56648	1.15e-06
9098	USP6	-2.75586	3.47e-06	-2.66569	1.85052e-06	-2.56657	3.69e-05
5774	PTPN3	-1.83645	0.000129	-2.18493	1.98432e-05	-2.57267	1.38e-06
254170	FBXO33	-1.16089	0.00491928	-2.4217	2.16465e-05	-2.57299	1.35e-06
3667	IRS1	-2.79718	1.79e-06	-2.92884	6.27293e-07	-2.57498	1.76e-06
4899	NRF1	-2.27005	6.04e-05	-2.48013	1.62526e-05	-2.57631	9.5e-06
163227	ZNF100	-1.18731	0.00985322	-1.68029	0.000701429	-2.57718	5.25e-06
29994	BAZ2B	-4.00476	4.39e-07	-4.01858	1.86485e-07	-2.58505	1.53e-06
8411	EEA1	-1.69465	0.000975	-4.03812	9.32539e-06	-2.58756	3.19e-06
9874	TLK1	-2.57647	3.59e-06	-3.00946	6.74851e-07	-2.59719	8.8e-06
54665	RSBN1	-2.24609	2.52e-06	-1.63006	7.6864e-06	-2.60049	8.05e-06
91748	ELMSAN1	-2.6981	1.25e-06	-1.8843	3.72413e-06	-2.62019	8.24e-06
55727	BTBD7	-2.38631	1.39e-05	-1.73344	5.67976e-05	-2.62101	1.21e-05
152006	RNF38	-1.7438	0.000135	-2.14247	1.69902e-05	-2.62598	4.2e-06
54554	WDR5B	-3.13542	1.86e-05	-3.03638	1.11815e-05	-2.63053	2.55e-05
3096	HIVEP1	-2.49526	7.37e-05	-2.39705	4.7283e-05	-2.63167	2.71e-05
993	CDC25A	-1.80344	8.96e-06	-2.36193	8.7473e-07	-2.63935	3.27e-06
23023	TMCC1	-2.65254	2.49e-05	-3.35229	2.68193e-06	-2.64001	7.48e-06
22823	MTF2	-2.14921	1.28e-05	-1.61979	5.76747e-05	-2.641	1.37e-06
84946	LTV1	-1.34917	7.64e-05	-1.62052	1.09351e-05	-2.64171	1.53e-06
25909	AHCTF1	-2.87086	1.66e-06	-3.10993	4.81442e-07	-2.64562	1.55e-05
1060	CENPC	-2.05678	4.34e-05	-2.44013	6.85212e-06	-2.64856	7.87e-06
56946	EMSY	-3.43378	1.98e-05	-3.0069	1.64667e-06	-2.65689	2.51e-06
23253	ANKRD12	-4.49924	7.48e-07	-3.77439	6.85646e-07	-2.65936	7.93e-06
23613	ZMYND8	-2.92644	8.29e-06	-5.34013	1.36979e-07	-2.66648	3.45e-06
54778	RNF111	-2.71818	0.00104324	-2.42106	0.00130804	-2.66904	1.23e-05
78996	CYREN	-1.50093	0.000125	-1.37477	0.000110957	-2.66934	2.76e-06
151963	MB21D2	-1.81377	1.45e-05	-2.40442	1.24841e-06	-2.68003	7.41e-06
57697	FANCM	-2.94299	1.3e-05	-3.05444	4.98799e-06	-2.68201	1.84e-05
9411	ARHGAP29	-1.47508	0.0336173	-1.95106	0.00501309	-2.7045	3.83e-06
55030	FBXO34	-2.64215	1.34e-05	-2.38134	1.3056e-05	-2.72555	2.1e-06
9693	RAPGEF2	-4.6593	1.34e-06	-3.94179	1.35706e-06	-2.7279	1.35e-05
1105	CHD1	-3.74509	1.42e-07	-3.58288	7.33212e-08	-2.73586	4.8e-06
10308	ZNF267	-2.96319	7.03e-05	-2.31629	0.00018181	-2.7366	5.69e-06
3796	KIF2A	-1.95507	6.79e-05	-1.90392	2.14836e-05	-2.7381	1.37e-06
64759	TNS3	-3.69971	6.18e-06	-4.84634	6.27293e-07	-2.74495	2.72e-06
96764	TGS1	-1.28289	0.00961132	-1.01533	0.0230754	-2.74688	8.74e-06
6877	TAF5	-3.04878	2.28e-06	-4.38722	1.36979e-07	-2.75176	1.67e-06
3720	JARID2	-3.74838	3.25e-06	-4.11823	8.64457e-07	-2.78181	1.29e-05
1955	MEGF9	-1.73493	7.44e-05	-4.41633	1.41632e-07	-2.78492	2e-06
91833	WDR20	-2.73041	8.05e-06	-2.01574	2.70093e-05	-2.78693	9.64e-06
9451	EIF2AK3	-1.69735	0.00031	-1.72848	0.000144348	-2.80838	5.22e-06
79848	CSPP1	-1.95156	0.000921	-2.66489	6.13027e-05	-2.81639	7.84e-05
2043	EPHA4	-3.64803	1.25e-06	-3.04265	1.23567e-06	-2.81845	3.83e-06
10194	TSHZ1	-1.00686	0.00667371	-1.14049	0.00194888	-2.82573	5.25e-06
64895	PAPOLG	-2.79822	2.93e-05	-2.24604	2.358e-05	-2.8262	5.66e-05
92595	ZNF764	-2.72286	2.79e-06	-2.84222	9.70911e-07	-2.84401	6.66e-06
9534	ZNF254	-1.3187	0.000793	-0.611095	0.0319066	-2.87973	4.31e-05
57568	SIPA1L2	-3.3283	1.25e-06	-2.61159	1.81087e-06	-2.87987	4.83e-06
205717	USF3	-1.83776	7.03e-05	-2.73234	2.61167e-06	-2.90941	4.31e-05
657	BMPR1A	-3.57461	3.55e-06	-3.5795	1.56682e-06	-2.91103	9.64e-06
55088	CCDC186	-1.22529	0.000318	-1.5443	3.5052e-05	-2.91579	7.75e-06
5926	ARID4A	-2.46206	3.84e-05	-1.86553	0.000119638	-2.94015	4.32e-06
54880	BCOR	-1.58228	0.000578	-1.04768	0.0047753	-2.9409	5.65e-06
84133	ZNRF3	-4.90835	6.73e-06	-4.2353	7.96715e-06	-2.95312	7.77e-05
148479	PHF13	-2.01976	0.000117	-1.72596	0.000166242	-2.95702	4.7e-06
347902	AMIGO2	-2.64482	0.000354	-3.08843	6.57625e-05	-2.95821	1.04e-05
284058	KANSL1	-2.61016	2.6e-06	-2.25565	2.65709e-06	-2.96381	1.52e-06
10427	SEC24B	-2.50026	5.81e-06	-2.17455	6.60895e-06	-3.02405	1.53e-06
1998	ELF2	-2.68255	0.000109	-2.60679	6.48071e-05	-3.02515	1.03e-06
94134	ARHGAP12	-3.47461	3.07e-06	-3.05246	2.93669e-06	-3.05664	3.67e-05
112840	WDR89	-2.19376	2.52e-05	-1.31427	0.000453321	-3.06433	6.66e-06
117143	TADA1	-2.17072	0.000214	-2.69144	2.5343e-05	-3.09667	8.76e-06
222194	RSBN1L	-2.65493	0.000105	-3.10072	1.8119e-05	-3.10546	8.63e-06
9778	KIAA0232	-2.10057	0.000287	-1.69753	0.000662242	-3.1389	3.62e-06
1385	CREB1	-2.18899	0.000292	-0.679379	0.0158638	-3.16605	6.46e-07
57182	ANKRD50	-4.02422	2.6e-06	-4.40374	6.78472e-07	-3.18557	6.46e-07
6874	TAF4	-3.95673	1.66e-06	-3.51824	1.38432e-06	-3.2116	2.09e-06
10395	DLC1	-2.33666	3.14e-05	-4.51356	2.55872e-06	-3.22011	2.34e-06
23592	LEMD3	-1.80193	0.000137	-1.76428	7.8702e-05	-3.24516	1.55e-06
171023	ASXL1	-3.12088	7.94e-06	-2.80452	7.28321e-06	-3.28099	2.01e-06
84132	USP42	-2.60106	5.38e-06	-1.52366	8.23123e-05	-3.28155	5.53e-06
51141	INSIG2	-1.77061	0.0011835	-2.5262	6.00317e-05	-3.33159	3.59e-06
1871	E2F3	-2.13929	9.05e-06	-1.9093	9.06147e-06	-3.34593	9.11e-07
56478	EIF4ENIF1	-2.57658	8.19e-06	-1.84414	3.4335e-05	-3.39544	6.66e-06
55167	MSL2	-3.70885	3.77e-07	-3.37023	3.14247e-07	-3.42304	5.65e-06
64864	RFX7	-2.89374	3.75e-06	-2.54866	3.7027e-06	-3.43196	6.48e-07
26122	EPC2	-2.63726	0.00031	-1.44647	0.0083965	-3.45712	3.84e-05
490	ATP2B1	-0.999248	0.000284	-1.32136	1.61008e-05	-3.47385	2.01e-06
23211	ZC3H4	-3.47742	1.81e-06	-2.66019	3.75462e-06	-3.57179	5.65e-06
1058	CENPA	-4.28078	5.45e-07	-2.99886	1.4414e-06	-3.585	1.37e-06
6934	TCF7L2	-4.57578	1.09e-06	-4.77585	3.38497e-07	-3.602	1.5e-06
23369	PUM2	-2.75266	4.36e-06	-2.67507	2.34841e-06	-3.63034	1.85e-06
200734	SPRED2	-2.97493	0.000137	-1.01384	0.0494176	-3.64471	9.09e-07
54790	TET2	-4.13765	3.26e-07	-3.5172	3.47411e-07	-3.65204	1.5e-06
8226	PUDP	-2.23336	1.6e-05	-3.40228	6.43278e-07	-3.70229	2.34e-06
51701	NLK	-2.76963	5.64e-06	-3.05934	1.44979e-06	-3.75026	1.71e-06
8491	MAP4K3	-3.94137	4.07e-06	-4.14061	1.38432e-06	-3.78668	3.33e-06
81839	VANGL1	-2.32782	1.19e-05	-1.98651	1.62823e-05	-3.83402	5.85e-06
55904	KMT2E	-2.50207	3.02e-06	-1.55099	0.000475745	-3.9613	7.24e-07
9857	CEP350	-3.46974	2.62e-05	-3.30353	1.7665e-05	-4.01312	1.37e-06
10451	VAV3	-4.02933	1.4e-06	-4.32817	4.02421e-07	-4.03288	8.28e-07
154743	BMT2	-4.84231	8.94e-07	-5.32203	2.03095e-07	-4.16391	2.1e-06
27327	TNRC6A	-3.30365	2.33e-05	-2.28464	1.43673e-06	-4.23891	5.75e-07
1945	EFNA4	-3.51608	1.25e-06	-4.08708	2.28038e-07	-4.51477	5.47e-06
84159	ARID5B	-4.92247	2.08e-06	-5.18522	6.60952e-07	-4.54571	4.74e-07
8204	NRIP1	-3.0297	8.26e-06	-4.16237	5.24278e-06	-4.83637	9.09e-07

## Sheet: DEGs in 3 drugs sorted
		AF		ONC		RITA			DE in 3 drugs	DE in 2 drugs	DE in 1 drugs
Entrez ID	Gene Symbol	log2FC	FDR	log2FC	FDR	log2FC	FDR
29094	LGALSL	0.722763	0.0117616	0.933287	0.00160805	0.386018	0.0498
79101	TAF1D	0.54805	0.0405435	0.661037	0.0109105	0.4256	0.0497
191	AHCY	0.476469	0.0202128	0.407867	0.0308525	0.28925	0.0496
9937	DCLRE1A	-0.634242	0.0117853	-0.826728	0.00151419	-0.455106	0.0494
10159	ATP6AP2	0.831619	0.00101928	0.39006	0.0476441	0.285779	0.0492
30851	TAX1BP3	0.715683	0.00306466	0.837424	0.000659272	0.258728	0.0491
51460	SFMBT1	-2.05068	0.000297	-1.98448	0.000196139	-0.475663	0.049
29896	TRA2A	1.56161	0.00646518	2.61131	1.94045e-05	-0.312957	0.049
55111	PLEKHJ1	0.739347	0.00430724	1.11088	0.000171805	0.276428	0.0488
10735	STAG2	-0.764527	0.00167087	-0.994809	0.000217793	-0.318122	0.0487
374986	MIGA1	-1.43883	0.000227	-1.52199	7.97607e-05	-0.465264	0.0484
166647	ADGRA3	-0.806338	0.00222635	-1.4817	2.11216e-05	-0.282618	0.0484
1603	DAD1	0.716772	0.00158788	0.464709	0.0135139	0.307967	0.0483
57679	ALS2	-1.12753	0.00455733	0.810425	0.0194731	-0.550878	0.0479
5889	RAD51C	-0.750006	0.00188087	-0.956799	0.000209484	-0.267601	0.0479
51390	AIG1	0.816857	0.00858466	-0.641279	0.0185049	0.423624	0.0477
79627	OGFRL1	1.55646	0.000742	1.58155	0.000367548	0.265971	0.0473
24144	TFIP11	-0.66424	0.0343813	-0.809489	0.00839837	-0.354812	0.0471
26959	HBP1	0.97693	0.0051745	0.688302	0.0240854	-0.623629	0.0469
253461	ZBTB38	0.667203	0.0256961	1.27702	0.000510365	-0.41548	0.0468
10733	PLK4	-2.30757	5.54e-06	-1.93311	7.84059e-06	-0.486484	0.0467
55133	SRBD1	-1.1585	0.000501	-1.65137	2.41947e-05	-0.32805	0.0467
58155	PTBP2	-0.627137	0.048235	-1.24126	0.000615141	-0.257833	0.0467
130574	LYPD6	-1.15213	0.0375871	-1.23588	0.0188439	-0.442546	0.0466
23029	RBM34	-0.50705	0.0170356	0.824506	0.000540172	-0.37638	0.0464
10023	FRAT1	-0.593045	0.0496743	-0.777712	0.00880718	-0.298102	0.0464
4708	NDUFB2	0.676953	0.00401692	0.710183	0.00183424	0.255011	0.0462
32	ACACB	-0.796689	0.0302949	-0.683508	0.0446685	-0.311379	0.0461
9414	TJP2	-1.00283	0.00231768	-1.97048	1.42599e-05	0.26745	0.0461
7182	NR2C2	-2.49604	1.29e-05	-2.04409	2.36733e-05	-0.435472	0.0459
8634	RTCA	-0.884402	0.00220778	-0.666385	0.00777778	-0.358407	0.0458
27130	INVS	-0.896474	0.0385102	-1.58569	0.000936371	-0.420694	0.0456
9687	GREB1	-0.694449	0.0125962	-0.880944	0.00194891	0.316436	0.0456
23312	DMXL2	-1.23628	0.00299851	-1.45077	0.000629177	-0.314423	0.0448
7295	TXN	0.762922	0.0048277	1.15216	0.000189626	0.277244	0.0447
83544	DNAL1	-0.568515	0.0287408	-0.99817	0.000646999	0.349345	0.0447
81704	DOCK8	-1.14825	0.00519398	-2.49416	1.76466e-05	0.464872	0.0447
84265	POLR3GL	0.665504	0.0268984	1.82435	2.78936e-05	0.351914	0.0445
51079	NDUFA13	0.460522	0.0228291	0.722034	0.00101736	0.694179	0.0443
439	ASNA1	0.51254	0.0470061	0.798401	0.00286661	0.298339	0.044
6397	SEC14L1	-0.788624	0.0223409	-1.71694	0.000203728	0.443639	0.0439
167227	DCP2	-0.806481	0.00867772	-0.808714	0.000808878	-0.261199	0.0437
1453	CSNK1D	-0.796013	0.0062351	0.752074	0.00237357	-0.459068	0.0435
8464	SUPT3H	-1.4322	0.00387471	-1.1224	0.0105133	0.407509	0.0435
64326	COP1	-1.25024	0.000159	-2.33252	1.43673e-06	-0.246996	0.0433
3009	HIST1H1B	-0.984292	0.00310677	-1.09096	0.000966831	-0.478434	0.0431
8526	DGKE	-0.892835	0.0138543	-1.38116	0.000581986	-0.303134	0.0431
57542	KLHL42	1.12529	0.000143	1.03739	0.00012523	0.399912	0.043
6720	SREBF1	-0.664552	0.0138624	-0.597578	0.0432938	0.384232	0.0429
124540	MSI2	-0.850603	0.00821513	-1.91323	1.73846e-06	0.276593	0.0428
28996	HIPK2	-1.73325	0.00181162	-2.99809	2.53083e-05	0.498691	0.0428
26519	TIMM10	0.53751	0.0353236	0.693865	0.00618288	0.26822	0.0427
91862	MARVELD3	0.943971	0.00287591	0.79099	0.00531293	-0.691815	0.0425
80071	CCDC15	-1.26092	0.00107489	-1.65227	9.45504e-05	-0.404565	0.0425
5255	PHKA1	0.64033	0.0126841	-0.780821	0.0462746	0.282498	0.0424
91147	TMEM67	-0.813616	0.031398	-0.972906	0.0083965	-0.381777	0.0423
28962	OSTM1	0.799874	0.0326571	-0.676417	0.0123424	-0.381246	0.0423
9063	PIAS2	-1.55053	0.001456	-0.848	0.000943745	-0.312449	0.0423
96459	FNIP1	-3.05102	1.56e-05	-3.35866	4.1995e-06	-0.269908	0.0422
81572	PDRG1	0.61151	0.0154183	1.54641	2.31329e-05	0.258722	0.0422
51124	IER3IP1	0.763113	0.020457	1.09644	0.00156934	0.287222	0.0421
5631	PRPS1	0.852101	0.0259627	-0.541638	0.0208153	-0.437672	0.042
4331	MNAT1	-1.62667	0.000123	-1.43948	0.000139185	-0.267323	0.042
51013	EXOSC1	0.473927	0.0368128	1.08321	0.000148806	0.269568	0.0419
8405	SPOP	-0.953206	0.00265124	-0.697074	0.0109163	-0.39729	0.0416
10248	POP7	-0.584204	0.00821513	-0.52538	0.0099604	-0.256745	0.0412
84282	RNF135	1.12871	0.00113058	1.37478	1.79871e-05	-0.461635	0.0411
8777	MPDZ	-1.0549	0.0168139	-2.02704	0.000165664	0.381608	0.0411
10432	RBM14	-1.42009	0.000141	-0.995389	0.0308314	0.488095	0.0408
11338	U2AF2	0.778197	0.029565	-0.589409	0.0458348	0.301136	0.0407
5562	PRKAA1	-0.70251	0.019409	1.48521	0.000103	0.42981	0.0404
57534	MIB1	-0.643901	0.0436442	-1.2674	0.000549736	-0.474332	0.0403
9531	BAG3	-0.468284	0.0255521	-1.72044	3.8539e-06	-0.27426	0.0402
11091	WDR5	-0.552021	0.0458597	1.35083	2.3281e-05	0.330969	0.0401
55249	YY1AP1	-0.531842	0.0340294	0.860773	0.00142158	-0.308699	0.04
83737	ITCH	-1.66227	0.000317	-1.50645	0.000333943	-0.350937	0.0397
2140	EYA3	-0.671163	0.0144165	-0.983812	0.000884601	-0.334926	0.0395
8723	SNX4	-0.688661	0.017512	-0.610692	0.0225949	-0.284047	0.0394
126282	TNFAIP8L1	-2.2282	0.00015	-1.81052	0.000318771	-0.469855	0.0393
10061	ABCF2	1.57266	0.000818	4.14311	8.64457e-07	0.40655	0.0391
22876	INPP5F	-0.865444	0.0087542	-1.23357	0.0005788	-0.447884	0.0389
65265	C8ORF33	1.14283	0.000523	1.45829	5.37512e-05	0.275381	0.0388
51379	CRLF3	-0.884172	0.00168901	-0.473834	0.0375034	-0.341865	0.0387
9759	HDAC4	-1.10027	0.00163123	-1.03793	0.00142212	-0.669964	0.0386
128710	SLX4IP	-1.63158	2.31e-05	-0.705695	0.00318184	-0.783446	0.0385
9489	PGS1	-0.880164	0.00156055	-1.62071	1.43992e-05	-0.503905	0.0379
64786	TBC1D15	-0.734953	0.00226147	-1.33998	2.26576e-05	-0.391646	0.0378
5073	PARN	-0.970547	0.000744	-1.92956	4.10692e-06	-0.642347	0.0377
202	CRYBG1	-1.23777	0.0100634	-2.53016	5.76747e-05	-0.361006	0.0374
10611	PDLIM5	-1.05638	0.00611589	-3.28468	2.10301e-06	-0.62385	0.0372
25957	PNISR	-1.7966	0.000438	-2.02215	0.000103704	-0.378204	0.037
80273	GRPEL1	0.530224	0.0274956	1.06317	0.000242546	0.259785	0.0364
25842	ASF1A	-0.612515	0.0206058	-1.00797	0.00278258	-0.445942	0.0363
23324	MAN2B2	0.889881	0.00743473	0.778386	0.0105534	0.285629	0.0363
10553	HTATIP2	1.32847	0.000363	0.930945	0.00217431	0.320871	0.0362
51678	MPP6	-1.37044	0.00241528	-0.88557	0.0196981	-0.42017	0.036
23598	PATZ1	-1.75416	8.58e-06	-0.74609	0.00127839	-0.39587	0.0358
10254	STAM2	-1.31467	0.0049283	-1.49367	0.000214376	-0.339388	0.0356
79137	RETREG2	0.527926	0.028405	0.610671	0.00898573	0.275775	0.0356
27161	AGO2	-3.43735	5.45e-07	-3.25694	3.28389e-07	-0.382995	0.0352
4860	PNP	0.644766	0.0103153	0.795278	0.0018475	0.275659	0.0352
219738	FAM241B	0.773539	0.0128656	0.588631	0.0360834	0.344028	0.0352
219	ALDH1B1	0.680698	0.00544739	-0.629107	0.00558937	0.368356	0.035
2040	STOM	1.60672	7.73e-05	1.04344	0.000772716	0.466195	0.0347
143884	CWF19L2	-1.11666	0.0142428	-0.997049	0.017828	-0.48332	0.0343
23450	SF3B3	1.32372	0.000217	0.983073	0.000862504	0.316352	0.0343
64781	CERK	-0.648251	0.0114176	-1.50841	2.79021e-05	0.299344	0.0341
152503	SH3D19	-0.927179	0.0226295	-2.12075	7.5028e-05	-0.36129	0.0338
51447	IP6K2	1.52804	6.64e-05	2.5582	1.22105e-06	0.377489	0.0338
440574	MINOS1	0.700936	0.00479293	0.476697	0.0269463	0.313813	0.0337
91404	SESTD1	-1.00465	0.00269965	-1.53083	0.000119638	-0.49543	0.0335
23635	SSBP2	-2.2298	3.62e-05	-3.49277	1.04939e-06	-0.632808	0.0334
56915	EXOSC5	0.62151	0.00686985	0.639875	0.00368507	0.301365	0.0334
116540	MRPL53	0.489894	0.0154768	0.640525	0.00204636	0.335754	0.0333
4779	NFE2L1	0.609967	0.00508933	1.76781	2.68193e-06	-0.355058	0.0332
127544	RNF19B	1.67341	0.000747	1.80068	0.0012549	0.413838	0.0332
91746	YTHDC1	-0.596293	0.0107158	0.809759	0.0186113	-0.35194	0.0331
55182	RNF220	-1.02973	0.0260201	-0.89247	0.0370626	-0.797322	0.0325
221150	SKA3	-0.585241	0.0357115	-0.547591	0.0351951	-0.321607	0.0323
64081	PBLD	0.507587	0.0330956	0.758284	0.00229885	-0.497317	0.0322
29988	SLC2A8	0.685904	0.0181081	1.12673	0.000544982	0.367371	0.0322
847	CAT	1.03003	0.000199	0.52752	0.00899298	0.443051	0.0321
79842	ZBTB3	-0.789043	0.0090442	-0.882133	0.0195568	-0.66935	0.032
27230	SERP1	0.599546	0.0192373	0.643622	0.00881946	0.287473	0.032
122786	FRMD6	-1.59566	1.43e-05	-2.08201	1.35228e-06	-0.296976	0.0319
84881	RPUSD4	-0.82245	0.0199192	-1.01852	0.00391803	-0.335136	0.0317
80139	ZNF703	-1.08574	0.00231768	-1.73379	5.7142e-05	0.30954	0.0317
9406	ZRANB2	0.638377	0.00880745	0.776013	0.00169607	0.408432	0.0316
50717	DCAF8	1.38095	0.0021908	1.57781	0.000536145	0.339589	0.0315
5204	PFDN5	0.562322	0.00749213	0.564466	0.00471923	0.342079	0.0312
4502	MT2A	0.953119	0.00039	1.35059	1.966e-05	0.420967	0.0312
81555	YIPF5	1.01125	0.00411794	0.989979	0.00292789	-0.482876	0.0309
991	CDC20	-0.736256	0.00995184	-0.550482	0.0314223	-0.318834	0.0309
51594	NBAS	-0.733734	0.044328	-0.866617	0.00936334	0.356583	0.0306
146057	TTBK2	-0.958958	0.00195683	-0.988978	0.000956599	0.27956	0.0302
23111	SPART	-0.90209	0.00391608	-2.0863	8.58626e-06	-0.39631	0.0298
55556	ENOSF1	0.681822	0.00799025	0.701088	0.00437357	0.364598	0.0295
55818	KDM3A	-0.628723	0.0369544	-0.581129	0.0386498	-0.482601	0.0292
203069	R3HCC1	0.543641	0.0363878	0.907054	0.00127911	0.398945	0.0291
55100	WDR70	-2.73067	9.3e-05	-4.11064	3.1095e-06	-0.349275	0.029
1666	DECR1	0.705966	0.00335024	0.779641	0.00107776	0.297955	0.0289
10007	GNPDA1	1.33506	0.000342	0.724448	0.00977876	0.30047	0.0288
6284	S100A13	0.740105	0.00461442	0.56356	0.0144924	0.308904	0.0288
286827	TRIM59	-1.94213	6.68e-05	-0.93717	0.00430552	-0.790027	0.0286
10551	AGR2	0.468287	0.0178851	-0.428902	0.0195711	-0.534013	0.0286
23585	TMEM50A	0.548549	0.00773571	0.772718	0.000538749	0.305403	0.0285
51548	SIRT6	0.57185	0.024136	0.935754	0.00204241	0.359921	0.0284
162989	DEDD2	1.25377	0.004019	0.77506	0.0369267	-0.500913	0.0283
5830	PEX5	1.00896	0.000703	1.13255	0.00017297	0.597447	0.0283
8826	IQGAP1	0.624844	0.014874	-1.34298	0.000147946	-0.339231	0.0282
64976	MRPL40	0.671124	0.00324382	1.02563	0.000110197	0.303674	0.0282
10668	CGRRF1	-0.596169	0.0362996	0.872026	0.00296341	-0.705093	0.028
444	ASPH	0.702938	0.00313637	-0.786153	0.00955109	-0.490145	0.028
55973	BCAP29	1.01229	0.001088	1.6214	2.02351e-05	-0.451722	0.028
9261	MAPKAPK2	-0.764778	0.00179348	-0.94036	0.0181699	-0.296809	0.0278
402778	IFITM10	0.579694	0.0467333	-0.752474	0.00861102	0.657435	0.0278
10801	SEPT9	-0.550159	0.0152907	-1.49787	1.41254e-05	0.464435	0.0277
55374	TMCO6	0.890723	0.00236065	1.24675	0.000141831	0.408308	0.0276
55288	RHOT1	-1.0519	0.00022	-0.786004	0.000837355	-0.466453	0.0275
4001	LMNB1	-0.500032	0.02185	-1.42518	1.64297e-05	-0.582554	0.0273
5962	RDX	-0.451048	0.0272232	-0.717729	0.00963583	-0.356216	0.0273
81559	TRIM11	-1.37353	0.00159085	0.88488	0.00140542	0.465746	0.0272
8724	SNX3	0.493488	0.0163517	0.636157	0.0023962	0.368988	0.0271
23335	WDR7	-2.25979	0.000646	-3.50027	1.80484e-05	-0.471872	0.027
205564	SENP5	-1.32355	7.18e-05	0.732339	0.00287734	-0.446434	0.027
84333	PCGF5	1.20317	0.00108968	1.05597	0.00150216	0.450573	0.027
55589	BMP2K	-0.68172	0.0280502	-1.43294	0.000179356	-0.673273	0.0268
23306	NEMP1	-1.35007	0.0156856	-2.04913	0.000775057	0.402548	0.0268
84108	PCGF6	-1.37369	0.00315613	-1.28285	0.00299046	-0.425554	0.0267
26272	FBXO4	0.776601	0.00635409	0.711041	0.00690725	0.525016	0.0267
11169	WDHD1	-0.753145	0.0118493	-1.47793	9.19434e-05	-0.571353	0.0266
51100	SH3GLB1	0.860361	0.000731	0.521761	0.0497816	-0.323367	0.0266
9209	LRRFIP2	-1.24477	0.000845	-0.981405	0.00232656	-0.322645	0.0264
64795	RMND5A	-0.607356	0.00816305	0.57951	0.00701147	0.317772	0.0264
145581	LRFN5	-1.34334	0.000845	-2.16414	1.83335e-05	-0.393109	0.0263
79947	DHDDS	-0.785766	0.0148004	-0.856726	0.00603129	0.34692	0.0263
64172	OSGEPL1	0.586635	0.0299237	0.640212	0.0315431	0.367992	0.0263
25938	HEATR5A	-1.54259	0.000632	-2.52634	1.22824e-05	0.444873	0.0263
120071	LARGE2	0.699411	0.0431197	0.744991	0.0228615	0.607641	0.0263
4682	NUBP1	-0.632619	0.0153478	-0.7067	0.00540568	-0.320763	0.0262
10730	YME1L1	1.12809	0.00504802	1.99238	6.87324e-05	-0.295261	0.0262
10629	TAF6L	-1.17536	0.0215868	-1.51404	0.00336776	0.387663	0.0261
285268	ZNF621	0.522302	0.0468163	1.77859	1.47298e-05	-0.741103	0.026
406	ARNTL	-1.31862	0.00793025	-0.541291	0.0315444	-0.38521	0.0258
57111	RAB25	0.545183	0.0151517	0.976803	0.000235429	0.303251	0.0258
25936	NSL1	-0.863905	0.00759899	-0.834498	0.00603569	-0.497854	0.0257
212	ALAS2	1.799	3.68e-05	2.12099	6.0175e-06	0.342394	0.0257
152926	PPM1K	-1.43317	0.00372352	-0.905822	0.0313364	0.610969	0.0257
55023	PHIP	-0.879387	0.0266047	-1.4969	0.000719139	-0.378897	0.0255
6652	SORD	0.970132	0.00417314	0.449263	0.023235	0.309811	0.0255
54858	PGPEP1	0.767529	0.0124093	0.796854	0.00665488	0.355551	0.0255
91120	ZNF682	-1.88213	0.000144	-1.32081	0.000836487	-0.703709	0.0254
55691	FRMD4A	-1.15418	0.00261471	-2.41576	1.08683e-05	-0.495719	0.0254
113179	ADAT3	-1.02522	0.0178937	-0.820138	0.0381776	0.486798	0.0254
55756	INTS9	-1.37876	0.00871856	-2.16377	0.000295184	-0.390362	0.0253
79675	FASTKD1	-1.06889	0.00150277	-2.43937	3.4818e-06	-0.37317	0.0253
3161	HMMR	-1.38674	3.69e-05	-1.15699	6.07862e-05	-0.328752	0.0253
8379	MAD1L1	-2.33561	9.34e-06	-3.2513	6.43278e-07	0.362668	0.0253
7009	TMBIM6	0.627287	0.00428234	0.80544	0.000510046	0.320633	0.0252
22897	CEP164	-0.565702	0.0236069	0.61049	0.0107919	0.373691	0.0252
4173	MCM4	1.03611	0.00265794	-1.7992	2.51955e-06	-0.365524	0.0251
8874	ARHGEF7	-2.92845	0.000319	-2.95242	0.000159947	-0.472551	0.0247
56983	POGLUT1	1.02537	0.000336	0.709118	0.00295947	0.297744	0.0247
5441	POLR2L	0.465442	0.0212522	0.366627	0.0473594	0.322972	0.0247
56255	TMX4	0.888397	0.00337678	1.12928	0.000416696	-0.448227	0.0246
90025	UBE3D	-0.840782	0.0284083	-0.970283	0.00911299	-0.479719	0.0244
57545	CC2D2A	-1.13954	0.0155629	-1.45242	0.00242351	-0.429917	0.0244
53836	GPR87	2.8574	3.85e-05	0.896945	0.0295752	1.09619	0.0244
7003	TEAD1	-1.48462	2.81e-05	-2.56571	5.31989e-07	-0.489376	0.0243
79954	NOL10	-0.683071	0.00958258	-1.3594	6.48197e-05	-0.324635	0.0243
10904	BLCAP	0.587649	0.0213761	-0.815033	0.0020826	-0.493467	0.0242
200539	ANKRD23	-0.914507	0.0115848	-0.938071	0.00664712	0.367402	0.0242
9320	TRIP12	-0.774446	0.00108002	-1.07018	6.65222e-05	-0.487195	0.0241
152206	CCDC13	0.96583	0.00816217	1.33933	0.000638792	0.40408	0.0241
403341	ZBTB34	-1.60716	5.13e-05	-1.17554	0.00020357	-0.398371	0.0239
79719	AAGAB	0.878699	0.00234131	0.733926	0.00444573	0.298492	0.0239
521	ATP5ME	0.712912	0.00266026	0.673645	0.00160664	0.303906	0.0238
4082	MARCKS	-1.04894	0.0433579	-1.44477	0.0054935	-0.601527	0.0237
79446	WDR25	-0.587446	0.0391528	-0.618959	0.0216005	-0.436183	0.0237
220074	LRTOMT	1.04465	0.00783606	1.49398	0.000492862	0.494645	0.0237
84902	CEP89	-0.979684	0.000825	-0.874263	0.0010101	-0.512671	0.0236
5621	PRNP	1.03322	0.00156925	1.94064	1.26853e-05	0.315733	0.0236
23140	ZZEF1	-0.794636	0.0174964	-1.1026	0.0016209	-0.539275	0.0235
5533	PPP3CC	-1.16658	0.000731	-0.920371	0.00198162	-0.368747	0.0235
60313	GPBP1L1	-1.36215	0.000108	-0.490208	0.0324784	-0.355457	0.0234
7320	UBE2B	-0.868436	0.00117408	1.0685	0.000344326	-0.34006	0.0234
3417	IDH1	0.480466	0.0281064	0.921775	0.000340748	0.317219	0.0234
57223	PPP4R3B	-2.12142	0.000221	-2.14824	0.000102341	-0.496994	0.0233
6566	SLC16A1	0.708252	0.00333964	1.48936	0.000235525	-0.635122	0.0232
6872	TAF1	-0.968539	0.0277804	-1.07634	0.0110385	-0.504614	0.0231
57506	MAVS	-0.736361	0.0127117	-0.635163	0.0191955	0.512677	0.023
3930	LBR	-0.677174	0.015367	-0.495655	0.049735	-0.520812	0.0229
54799	MBTD1	-1.52774	0.00206685	-1.75889	5.10102e-05	-0.451179	0.0229
2799	GNS	0.825835	0.00194454	0.605331	0.00815478	0.339148	0.0229
3177	SLC29A2	-0.901789	0.00530397	1.37969	6.43559e-05	0.360964	0.0229
10018	BCL2L11	-1.85251	3.61e-05	0.617669	0.0123266	-0.765412	0.0228
257019	FRMD3	-0.664472	0.0406408	-0.616867	0.0415562	-0.500831	0.0227
399909	PCNX3	0.988039	0.00372105	0.744693	0.01262	0.40857	0.0227
8837	CFLAR	-0.582082	0.00930607	-1.65364	5.83307e-06	0.469195	0.0227
10920	COPS8	0.574634	0.0309846	1.00229	0.000499004	0.303191	0.0226
7988	ZNF212	-0.741011	0.0250304	-0.819924	0.0100371	-0.3774	0.0225
113791	PIK3IP1	0.59704	0.0415222	0.722637	0.0110298	0.487924	0.0224
23133	PHF8	-0.809829	0.024876	-0.661654	0.0464127	-0.529859	0.022
1789	DNMT3B	-0.779501	0.00905172	-1.15906	0.00045082	0.578441	0.022
55758	RCOR3	-1.17983	0.00251051	1.65029	6.36082e-05	-0.564276	0.0219
144455	E2F7	1.23401	0.000127	-0.542035	0.0133152	-0.396504	0.0219
221092	HNRNPUL2	0.480304	0.0497457	-0.548362	0.0437163	0.298078	0.0219
90550	MCU	-0.854325	0.00389206	-1.1785	0.00027757	0.338955	0.0219
54704	PDP1	-1.27916	0.000733	-1.46874	0.00015468	-0.499874	0.0218
57761	TRIB3	-0.966799	0.000658	1.08948	0.000157563	-0.344948	0.0218
55471	NDUFAF7	0.589835	0.0141605	0.869919	0.000827105	0.675065	0.0218
10208	USPL1	-1.18939	0.000383	0.628367	0.0124888	-0.667802	0.0216
4731	NDUFV3	-1.48047	0.00145901	0.839014	0.000437677	0.347016	0.0216
4726	NDUFS6	0.449486	0.0328827	0.430987	0.0287591	0.311544	0.0215
4886	NPY1R	-0.675606	0.00499805	-2.25183	1.16259e-06	-0.368877	0.0213
7332	UBE2L3	0.897021	0.0139847	-0.498247	0.0146007	-0.3582	0.0213
51024	FIS1	0.557518	0.0317577	0.527948	0.0294901	0.354155	0.0213
84726	PRRC2B	-0.681082	0.0273561	0.960229	0.00872479	0.369436	0.0213
8504	PEX3	-0.553283	0.0311503	-2.14132	3.63807e-06	-0.735389	0.0212
80306	MED28	0.57914	0.0116852	1.15826	7.97607e-05	0.312456	0.0212
130814	PQLC3	0.723892	0.0056188	1.13681	0.000172006	0.392406	0.0211
637	BID	0.485048	0.0471036	-0.592205	0.0210921	0.421492	0.0211
51762	RAB8B	-0.744418	0.017643	-1.36169	0.000249307	-0.484745	0.021
152189	CMTM8	-1.7045	5.32e-05	-1.41798	8.71902e-05	-0.384923	0.021
55846	ITFG2	0.744416	0.0427467	2.13132	4.02969e-05	-0.765631	0.0207
374378	GALNT18	-1.40094	0.000299	-1.78329	3.06233e-05	-0.570902	0.0205
94081	SFXN1	-1.74088	3.03e-05	-3.81935	1.60295e-07	-0.306219	0.0205
5108	PCM1	-1.41762	0.000134	-0.922232	0.00244354	-0.635233	0.0204
54910	SEMA4C	-2.29308	2.28e-06	-2.6674	4.3984e-07	-0.414063	0.0204
8839	WISP2	0.950678	0.000949	1.64514	1.2981e-05	0.363132	0.0204
29901	SAC3D1	0.731943	0.00486917	-0.459127	0.040208	-0.363836	0.0203
222962	SLC29A4	0.689969	0.0276145	0.827415	0.00706004	0.304918	0.0203
254359	ZDHHC24	0.833187	0.00288275	0.996873	0.000528936	0.384078	0.0203
25803	SPDEF	-0.803583	0.00142103	-1.17366	6.15694e-05	0.609565	0.0203
54841	BIVM	-1.34938	0.00917902	-1.04952	0.0241331	-0.517084	0.0198
57600	FNIP2	-1.38987	0.00354628	-1.74506	0.000479785	-0.501962	0.0198
151194	METTL21A	-1.32774	0.000428	1.66725	0.000207106	-0.453432	0.0197
27032	ATP2C1	0.701449	0.00898396	1.58037	2.57664e-05	0.356244	0.0197
143187	VTI1A	-2.06513	0.000338	-1.66457	0.00080469	0.42373	0.0194
10682	EBP	0.423536	0.0372966	1.27858	2.31561e-05	0.617292	0.0193
115548	FCHO2	-3.46562	9.09e-06	-4.14159	1.46257e-06	-0.388612	0.0192
51004	COQ6	0.891829	0.00123424	0.849859	0.000996983	0.357524	0.0192
26003	GORASP2	-0.595909	0.00880745	0.544751	0.0326365	-0.30597	0.0191
55604	CARMIL1	-2.67023	3.9e-05	-3.85596	1.78716e-06	-0.565667	0.019
10946	SF3A3	1.18059	0.00135015	1.19029	0.000746951	0.400303	0.019
729967	MORN2	0.877406	0.00211133	0.79303	0.00244392	0.470247	0.019
10690	FUT9	-2.41052	0.000162	-4.9283	8.78859e-07	-0.471473	0.0189
10939	AFG3L2	-0.763023	0.00164166	-0.786157	0.000794798	-0.40122	0.0189
83549	UCK1	0.731449	0.00194916	0.391576	0.0418213	0.352402	0.0189
8633	UNC5C	-1.62443	0.000687	-1.37833	0.00115963	-0.51812	0.0187
8624	PSMG1	0.882207	0.0185468	-1.02492	0.00530301	-0.442262	0.0187
6259	RYK	-1.93719	4.3e-05	-1.90691	2.30634e-05	-0.372657	0.0187
2787	GNG5	0.514357	0.0220147	0.683245	0.00284354	0.357092	0.0187
5583	PRKCH	-2.08061	0.000971	-3.70804	1.09262e-05	-0.418695	0.0185
55069	TMEM248	-0.670408	0.00495215	-0.580642	0.00750444	-0.344073	0.0185
2963	GTF2F2	-0.766984	0.0268064	-0.742433	0.0221749	-0.426096	0.0184
6840	SVIL	-2.30895	6.69e-05	-2.7848	9.32539e-06	-0.359602	0.0184
6748	SSR4	0.412873	0.0337	0.41593	0.0231064	0.336836	0.0184
404672	GTF2H5	0.751678	0.0147854	0.560941	0.0443667	0.366396	0.0184
387119	CEP85L	-1.03432	0.0303934	-1.17531	0.0107966	-0.527629	0.0183
23078	VWA8	-0.930022	0.0445679	-1.92629	0.000398078	-0.335131	0.0183
54788	DNAJB12	-0.825158	0.0297588	-0.667568	0.0118551	-0.307962	0.0183
7126	TNFAIP1	0.793187	0.00401714	1.33542	7.29393e-05	0.405201	0.0183
81554	RCC1L	0.423675	0.0370278	-0.693551	0.00148229	0.444226	0.0183
22875	ENPP4	-1.19919	0.00919822	-2.27823	8.44633e-05	-0.469233	0.0182
2744	GLS	2.00796	0.000154	1.32305	0.000482547	0.474144	0.0182
7158	TP53BP1	-0.71828	0.0260565	-1.17589	0.000913692	-0.88722	0.0181
25996	REXO2	1.02454	0.00496435	0.692276	0.0019134	0.329714	0.018
90637	ZFAND2A	0.823731	0.00111944	1.49499	1.11879e-05	0.446539	0.018
123228	SENP8	-0.489092	0.0473848	-1.28844	8.32906e-05	-0.562035	0.0179
7422	VEGFA	-1.25531	8.83e-05	1.54506	1.07632e-05	0.371465	0.0179
79718	TBL1XR1	-0.69547	0.00415359	-0.738278	0.0017662	-0.322401	0.0178
22848	AAK1	-1.25925	0.000966	-1.50014	0.000163191	0.414706	0.0178
4758	NEU1	0.744023	0.0128105	1.12078	0.000633207	0.312438	0.0176
26263	FBXO22	1.30394	5.38e-05	1.52901	9.0239e-06	0.469673	0.0176
55914	ERBIN	-1.3877	9.18e-05	-1.2601	8.56821e-05	-1.18936	0.0174
9821	RB1CC1	-0.721492	0.038168	-1.16684	0.00167807	-0.450264	0.0174
285489	DOK7	-1.47554	0.00073	-3.57572	1.22105e-06	-0.410796	0.0174
79982	DNAJB14	-0.616183	0.0135132	-0.455051	0.0431335	-0.339682	0.0174
4192	MDK	0.560672	0.0156983	0.70007	0.00278727	0.378139	0.0174
3916	LAMP1	0.736884	0.00422909	0.604104	0.00586157	0.603682	0.0174
8239	USP9X	-0.485278	0.0243984	-1.44265	1.43927e-05	-0.425421	0.0173
9988	DMTF1	-0.56785	0.0254609	1.28896	9.20237e-05	-0.7733	0.0172
389541	LAMTOR4	0.634784	0.00459378	0.680515	0.00184595	0.416693	0.0172
53407	STX18	-1.83948	3.48e-05	-0.563049	0.0310791	-0.461464	0.0169
51421	AMOTL2	-0.50404	0.0185468	2.10026	1.23567e-06	0.459896	0.0169
6482	ST3GAL1	-1.03637	0.0171028	-0.813234	0.0400748	-0.559126	0.0168
22949	PTGR1	1.21501	0.000184	0.789317	0.00177557	0.361492	0.0168
9650	MTFR1	-0.58796	0.0463875	-0.558334	0.0429304	-0.420707	0.0167
124411	ZNF720	-1.79279	0.000151	-1.96068	4.17128e-05	-0.317923	0.0167
6146	RPL22	0.784382	0.00161363	0.793509	0.000882345	0.328548	0.0167
10116	FEM1B	-0.896818	0.0303842	0.836571	0.000730262	-0.952425	0.0166
55789	DEPDC1B	-0.988112	0.00278574	-0.776789	0.00753931	-0.469367	0.0166
81617	CAB39L	-0.841186	0.001899	-1.50683	2.12193e-05	-0.71552	0.0164
143458	LDLRAD3	-1.83621	0.00021	-1.67417	0.000200852	-0.331306	0.0164
10667	FARS2	-1.39717	0.00483875	-2.70017	3.55245e-05	-0.916407	0.0163
9581	PREPL	0.758309	0.00430818	1.10347	0.000214199	0.404	0.0163
10458	BAIAP2	-0.692557	0.0197901	-1.03962	0.00113039	0.617956	0.0163
11335	CBX3	-0.948214	0.0242773	-1.70077	0.000441669	-0.34871	0.0161
30815	ST6GALNAC6	0.640105	0.0202128	0.848398	0.00259033	0.4104	0.0161
158880	USP51	-1.07353	0.00712544	-0.78052	0.0269856	-0.533009	0.016
2004	ELK3	-0.560328	0.0391528	-1.19854	0.0002596	-0.375853	0.016
84324	SARNP	0.673602	0.0244582	1.62735	5.7826e-05	0.353249	0.016
6443	SGCB	0.912385	0.000377	1.73036	2.85566e-06	0.538535	0.016
11056	DDX52	-0.902282	0.040107	-1.0386	0.0213429	-0.437949	0.0158
5660	PSAP	0.559862	0.0117616	0.422544	0.0348082	0.329906	0.0158
26353	HSPB8	0.501312	0.0139555	-0.682583	0.00139024	0.389509	0.0158
6046	BRD2	0.734706	0.00203372	1.89737	2.1555e-06	0.380466	0.0157
64792	IFT22	1.71518	0.000219	0.989695	0.00443586	0.355358	0.0156
51621	KLF13	-1.14557	0.0178851	-1.12615	0.0134039	-0.76406	0.0155
5286	PIK3C2A	-0.982528	0.0183495	-0.942335	0.00507391	-0.41798	0.0155
28956	LAMTOR2	0.673402	0.0120367	0.873853	0.00160152	0.366354	0.0155
29087	THYN1	0.697089	0.0190972	0.66483	0.0168822	0.455296	0.0155
5747	PTK2	-1.95839	0.00035	-2.85138	3.08509e-06	-0.432775	0.0154
30	ACAA1	0.948891	0.00417314	1.04258	0.0014175	0.346064	0.0154
1476	CSTB	0.555231	0.00726861	0.741489	0.000720823	0.349805	0.0153
256281	NUDT14	0.701534	0.00911442	1.40868	5.77613e-05	0.473728	0.0153
5208	PFKFB2	1.11338	0.000373	1.6109	1.65378e-05	0.540478	0.0153
51663	ZFR	-0.883977	0.00076	0.778975	0.00250022	-0.353367	0.0152
54926	UBE2R2	-1.05516	0.000197	-0.810711	0.000622012	-0.32591	0.0152
55626	AMBRA1	-1.80199	0.000175	-1.65309	0.000160019	-0.599251	0.0151
23348	DOCK9	-1.51334	0.000153	-2.33926	4.38588e-06	-0.366779	0.0151
2776	GNAQ	-0.955528	0.000946	-2.80496	4.28055e-07	-0.47308	0.015
9827	RGP1	0.498465	0.0456716	0.974337	0.000614865	0.345823	0.015
29966	STRN3	-3.34453	2.6e-06	-2.33402	1.03322e-05	-0.800278	0.0149
8394	PIP5K1A	-1.74979	1.17e-05	-0.503662	0.0337016	-0.755267	0.0149
8570	KHSRP	0.469943	0.0475947	0.920658	0.000646999	0.324017	0.0149
51317	PHF21A	-2.53053	4.86e-06	-1.52405	6.13027e-05	0.435406	0.0149
22839	DLGAP4	-0.803388	0.0102475	1.847	0.000296723	-0.437693	0.0148
55728	N4BP2	-2.12908	0.00281755	-1.54826	0.00018852	-0.496628	0.0147
2000	ELF4	-0.669889	0.0268077	-1.29205	0.000307376	-0.478811	0.0147
5094	PCBP2	-2.03669	0.000401	0.759082	0.000950637	0.340406	0.0147
9810	RNF40	0.717564	0.0132893	1.66955	3.37622e-05	0.357808	0.0147
55696	RBM22	0.862038	0.000853	1.43548	8.39465e-05	0.548568	0.0147
8021	NUP214	-1.03077	0.0166691	-2.24535	6.98412e-05	-0.551508	0.0146
4883	NPR3	-1.22263	0.00247762	-0.912806	0.00911879	-0.425755	0.0146
23326	USP22	-0.460818	0.0388761	0.685391	0.0312268	-0.34277	0.0146
51102	MECR	0.933149	0.0312752	1.43762	0.0017504	0.344401	0.0146
23767	FLRT3	1.36136	0.00527519	2.37007	7.92464e-05	0.650206	0.0146
55247	NEIL3	-2.9237	1.52e-05	-1.57908	0.000485213	-0.753387	0.0145
23144	ZC3H3	-1.12569	0.0154789	-0.893216	0.0348082	-0.710676	0.0145
55180	LINS1	-1.08758	0.00615334	1.69288	0.000622539	-0.350039	0.0145
10467	ZNHIT1	0.887433	0.00151213	0.868607	0.0010259	0.347687	0.0145
29984	RHOD	0.75225	0.0030439	0.417049	0.0489786	0.381698	0.0145
8925	HERC1	-1.11045	0.00102121	-2.96706	9.48318e-07	-0.575787	0.0144
3688	ITGB1	-0.951093	0.00143299	-0.862243	0.00160987	-0.533926	0.0144
7813	EVI5	-0.989541	0.0310075	-1.21954	0.00692819	-0.595815	0.0143
55233	MOB1A	0.849338	0.000946	0.558189	0.00791828	-0.386212	0.0143
23200	ATP11B	-1.20618	0.00990527	-1.30159	0.00412392	-0.486094	0.0142
740	MRPL49	0.519971	0.0288024	0.633606	0.00676186	0.388791	0.0142
8672	EIF4G3	-0.773206	0.0497583	-2.28663	4.10885e-05	-0.399687	0.014
114793	FMNL2	-1.52727	2.64e-05	-1.88523	3.31965e-06	0.395975	0.014
388	RHOB	-0.924002	0.000377	-1.01673	0.000104043	0.436847	0.014
10775	POP4	1.47593	0.00404461	-0.541383	0.00995923	-0.397303	0.0138
8479	HIRIP3	0.749232	0.0132398	0.834976	0.00466295	0.369571	0.0138
3364	HUS1	0.778365	0.0227454	1.46074	0.000295136	0.413802	0.0138
79647	AKIRIN1	-0.421858	0.036583	1.218	3.01657e-05	0.446417	0.0138
9886	RHOBTB1	-0.812046	0.0119661	-1.19826	0.000670924	0.476191	0.0138
8567	MADD	-0.694003	0.00708222	-0.762232	0.00253047	-0.549836	0.0136
4144	MAT2A	-1.50587	1.5e-05	-2.50305	4.02421e-07	-0.501917	0.0136
23473	CAPN7	-0.693828	0.0186005	-0.995277	0.00140829	-0.377782	0.0136
1039	CDR2	-0.890027	0.0039632	0.661994	0.0143174	-0.365396	0.0136
10380	BPNT1	0.579527	0.0292085	-0.596655	0.0270804	0.643767	0.0136
29102	DROSHA	-0.83246	0.0193065	-1.73692	0.000111898	-0.35424	0.0135
282991	BLOC1S2	0.957241	0.00174505	0.785731	0.00371064	0.637272	0.0135
9093	DNAJA3	-0.814252	0.00109295	-0.632469	0.00329406	-0.473298	0.0133
57189	KIAA1147	0.492298	0.0497194	0.840657	0.00173932	0.378479	0.0133
10360	NPM3	0.563687	0.0133926	0.66708	0.00325057	0.37832	0.0132
92400	RBM18	0.898883	0.00170649	1.17557	0.000159367	0.455241	0.0132
6498	SKIL	0.821667	0.0181448	0.895925	0.00754162	0.371837	0.0131
25896	INTS7	-0.843828	0.00272905	-0.795576	0.00241989	-0.486993	0.013
83658	DYNLRB1	0.555446	0.00965137	1.11107	6.33927e-05	0.364414	0.013
6923	ELOB	1.2265	0.000362	0.76959	0.000703617	0.389014	0.013
6138	RPL15	1.91884	0.000342	0.854157	0.000413863	0.418069	0.0129
84284	NTPCR	1.11237	0.000433	0.764412	0.00290251	0.429348	0.0129
84656	GLYR1	0.534726	0.0210181	0.964989	0.000347461	0.520275	0.0129
400629	TEX19	-1.2456	0.0253796	-1.80249	0.00198235	-0.826714	0.0128
9295	SRSF11	-1.80237	0.000205	-1.78745	0.000109718	-0.487819	0.0128
55161	TMEM33	0.58047	0.0238441	-0.479303	0.0404557	-0.505912	0.0127
5663	PSEN1	-0.731017	0.0268985	1.41117	0.000313434	-0.4874	0.0127
5717	PSMD11	1.10725	0.0302467	-1.03846	0.00013823	-0.371888	0.0127
23517	MTREX	-0.759263	0.00660113	-1.72565	1.70884e-05	-0.416882	0.0126
2975	GTF3C1	-0.563029	0.0104395	-0.984119	0.000174279	0.442282	0.0126
80821	DDHD1	-1.49473	0.000126	-2.22839	4.44835e-06	-0.583485	0.0125
286006	LSMEM1	1.28191	0.0270728	2.08479	0.00100379	1.09139	0.0125
342371	ATXN1L	-1.04263	0.000612	-0.898069	0.000930609	-0.435084	0.0124
10048	RANBP9	-1.2531	0.000305	-1.8848	0.000119415	-0.393862	0.0124
84269	CHCHD5	0.588618	0.0392429	0.859645	0.00332896	0.497407	0.0123
159371	SLC35G1	0.846176	0.00195608	2.55659	8.69228e-07	-0.659968	0.0122
10450	PPIE	0.601898	0.036583	1.82811	2.15438e-05	0.357243	0.0122
126328	NDUFA11	0.625864	0.0238441	1.37131	0.00010674	0.488549	0.0122
9818	NUP58	1.90091	9.67e-06	1.60182	3.43876e-05	-0.61098	0.0121
5558	PRIM2	-1.19686	0.000897	-1.95061	1.81344e-05	-0.53412	0.0121
23181	DIP2A	-0.900585	0.0418824	0.844315	0.00284744	0.651105	0.0121
5195	PEX14	-1.47034	7.09e-05	-2.00852	6.273e-05	-0.63991	0.012
80745	THUMPD2	0.611232	0.0456278	1.91079	2.45475e-05	0.369259	0.012
23387	SIK3	-2.15385	0.000159	-2.44742	3.43095e-05	-0.743454	0.0119
23761	PISD	-1.0966	0.00183819	-0.970603	0.00242439	-0.545355	0.0119
8295	TRRAP	-0.827241	0.00834441	-1.89571	2.11891e-05	-0.442129	0.0119
9364	RAB28	-1.91254	0.00034	-1.73085	4.87506e-05	-0.369052	0.0119
9014	TAF1B	-1.34581	3.85e-05	-1.11621	6.55042e-05	-0.631233	0.0118
23214	XPO6	-0.93839	0.00158561	-0.695383	0.0062735	-0.556826	0.0118
57659	ZBTB4	-1.09462	0.00325913	-0.998934	0.00226907	-0.416435	0.0118
4194	MDM4	-1.17381	0.00822173	0.809467	0.00486301	-0.375669	0.0118
7284	TUFM	0.666888	0.00734191	0.737907	0.00250839	0.380023	0.0118
27433	TOR2A	1.24378	0.00188512	1.28448	0.00091031	0.385771	0.0117
255812	SDHAP1	-1.93355	0.00108855	-2.6549	7.01863e-05	0.405976	0.0117
9213	XPR1	-0.762735	0.00189439	-1.73832	4.42144e-06	0.494058	0.0117
9765	ZFYVE16	1.23287	0.0141117	-2.64476	6.73164e-05	-0.762717	0.0115
161291	TMEM30B	0.941051	0.000568	0.806152	0.000895654	0.444368	0.0115
10299	MARCH6	-0.469341	0.0349702	-1.73926	9.88243e-05	-0.485648	0.0114
79086	SMIM7	-1.71932	0.000702	-1.99335	0.000138156	-0.403619	0.0114
9716	AQR	-0.558475	0.0340854	-1.54886	3.58363e-05	-0.385523	0.0114
51398	WDR83OS	0.443171	0.0352593	0.678321	0.00213651	0.360999	0.0114
59286	UBL5	0.771187	0.010108	0.891397	0.00272841	0.346442	0.0113
23582	CCNDBP1	0.609902	0.00901982	1.31425	3.52167e-05	0.44031	0.0113
9202	ZMYM4	-1.57283	2.14e-05	-1.74	5.31541e-06	-0.808973	0.0112
51082	POLR1D	-1.30055	3.94e-05	2.08694	4.83402e-06	-0.465702	0.0112
10238	DCAF7	-0.638774	0.00595439	0.459262	0.0399946	0.435495	0.0112
4601	MXI1	0.850977	0.00208908	1.26006	8.47002e-05	0.465645	0.0112
80762	NDFIP1	0.646959	0.00911006	0.57752	0.0338864	0.543404	0.0112
23007	PLCH1	-2.83314	3.21e-05	-2.96159	1.17155e-05	-0.741472	0.0111
53344	CHIC1	-0.836423	0.0142983	-1.04225	0.00252425	-0.882625	0.011
56180	MOSPD1	0.878813	0.00495301	1.40602	0.000131079	-0.722601	0.011
55614	KIF16B	-0.820509	0.00102915	-1.10103	0.000256759	-0.664478	0.011
220929	ZNF438	-1.04273	0.00186936	-1.56618	6.81974e-05	-0.620188	0.011
9604	RNF14	-0.481475	0.046605	-1.2064	0.000112849	-0.560243	0.011
79064	TMEM223	-1.32225	0.000615	-1.35918	0.000277732	-0.486806	0.011
114049	BUD23	0.52825	0.0289444	0.612527	0.00907704	0.355825	0.011
56900	TMEM167B	0.770571	0.00216049	1.38608	2.3587e-05	0.375856	0.0109
374395	TMEM179B	0.730278	0.00624863	1.50132	3.11673e-05	0.393927	0.0109
3491	CYR61	1.04278	0.00853042	1.20739	0.013244	0.512732	0.0109
1141	CHRNB2	0.853845	0.0116446	0.653587	0.0321736	0.61364	0.0108
8864	PER2	-1.7373	0.000168	0.752381	0.0182745	-0.794263	0.0107
4651	MYO10	-0.722225	0.0429785	-0.982777	0.00583974	-0.437609	0.0107
10847	SRCAP	0.617412	0.031263	0.625718	0.0206916	-0.717555	0.0106
55635	DEPDC1	-1.16424	7.93e-05	-2.22836	0.000579942	-0.665829	0.0106
4602	MYB	-1.51368	9.13e-05	-2.23784	3.46053e-06	-0.575277	0.0106
25980	AAR2	0.624045	0.02035	1.18665	0.000229616	0.362314	0.0106
159195	USP54	-1.66019	0.00524185	-1.63337	0.00367243	-0.725337	0.0105
4628	MYH10	-0.943197	0.00232919	-2.46529	2.28888e-06	-0.412645	0.0105
23165	NUP205	-0.609671	0.0211498	-1.29291	0.000112964	-0.373735	0.0105
1802	DPH2	0.669719	0.0218771	0.727334	0.00953597	0.378631	0.0105
51241	COX16	1.56611	5.66e-05	0.750035	0.00384875	0.68793	0.0105
7112	TMPO	-1.44567	0.00018	-2.66976	1.68524e-06	-0.451443	0.0104
51060	TXNDC12	0.677625	0.00404461	0.897712	0.000384781	0.373674	0.0104
50862	RNF141	1.08867	0.00597615	0.912303	0.0108465	0.508365	0.0104
79036	KXD1	0.507242	0.0378703	0.484996	0.0336846	0.369452	0.0103
56061	UBFD1	0.735373	0.00314604	1.02081	0.000207106	0.430677	0.0103
57685	CACHD1	-1.31334	0.00338067	-1.49167	0.000902866	-0.729656	0.0102
1665	DHX15	-0.743043	0.00271023	-2.38195	8.29527e-07	-0.395118	0.0102
5049	PAFAH1B2	-0.484647	0.0322705	-0.472579	0.0259666	-0.408333	0.0101
6625	SNRNP70	0.826649	0.000813	0.570025	0.00514572	0.469964	0.0101
3226	HOXC10	-0.394302	0.0491448	0.832102	0.000408356	0.581762	0.0101
23225	NUP210	0.684373	0.0181883	-0.696568	0.00366062	-0.601318	0.01
55975	KLHL7	0.755768	0.00271377	0.819885	0.000961336	0.53754	0.01
23244	PDS5A	-0.930819	0.00180071	-1.35521	8.08589e-05	-0.509999	0.0099
89970	RSPRY1	-1.1568	0.00213731	-1.39957	0.000351586	-0.614684	0.00988
5347	PLK1	-1.91003	5.77e-05	-1.06091	0.00153169	-0.466144	0.00986
26207	PITPNC1	-0.421405	0.0442995	-0.693903	0.0018475	0.40327	0.00985
64151	NCAPG	-0.764596	0.00390404	-0.463136	0.0431255	-0.486952	0.00975
23008	KLHDC10	-0.730298	0.00433274	0.546779	0.0137842	-1.1795	0.0097
440590	ZYG11A	-1.90403	0.000226	-1.7408	0.000213855	-0.551292	0.00969
84105	PCBD2	1.79678	0.00585481	1.91213	0.00250384	0.481496	0.00966
4335	MNT	-1.27449	0.00422909	-0.987036	0.0122116	0.643273	0.00966
5701	PSMC2	0.602824	0.00677406	-0.783788	0.000794755	-0.381064	0.00965
126231	ZNF573	-1.42823	0.0220223	-1.47716	0.0126769	-0.677693	0.00957
337876	CHSY3	-1.03526	0.0197901	-0.914157	0.0260306	-0.525783	0.00955
89958	SAPCD2	-0.601281	0.0083888	-0.756231	0.00128024	-0.511777	0.00949
58516	SINHCAF	-1.02829	0.000813	0.811184	0.0008854	-0.451092	0.00949
79139	DERL1	-0.404385	0.0489939	-0.564355	0.0235696	-0.359114	0.00949
51176	LEF1	-0.603024	0.0297928	-0.575653	0.0265142	-0.483538	0.00942
26173	INTS1	1.04064	0.00470835	1.03399	0.00307298	0.673507	0.00942
10507	SEMA4D	-1.52907	0.00105116	-1.54822	0.000554295	-0.737596	0.00941
2877	GPX2	1.09964	0.00716112	-1.00981	0.00768125	0.449573	0.00941
7846	TUBA1A	0.776999	0.00173565	1.53127	1.0306e-05	0.602024	0.00939
4781	NFIB	-1.19472	0.000144	-1.98916	2.60601e-06	-0.470525	0.00938
3958	LGALS3	0.77556	0.00222976	0.731344	0.00196843	0.429242	0.00937
4810	NHS	-0.581647	0.0252193	-0.665495	0.00835677	-0.569485	0.00933
92312	MEX3A	0.499881	0.0329112	0.54935	0.0142387	0.48504	0.00932
996	CDC27	-1.5054	8.48e-05	-1.60928	2.6087e-05	-0.555817	0.00924
522	ATP5PF	0.630599	0.00589695	0.390346	0.0489201	0.371157	0.00922
1488	CTBP2	-1.79525	1.15e-05	-1.50789	1.73336e-05	-0.398898	0.00919
23587	ELP5	0.629112	0.0171738	0.419735	0.0407012	0.446305	0.00919
27085	MTBP	-1.32415	0.00118637	-1.22208	0.00118685	-0.51748	0.00914
1656	DDX6	0.61226	0.0423636	0.467489	0.0310569	-1.02486	0.00906
158	ADSL	-0.532042	0.0135132	-1.08791	0.000111898	-0.41874	0.00906
11187	PKP3	0.712884	0.00210981	0.506148	0.0105259	0.403413	0.00899
56261	GPCPD1	-1.01089	0.015197	1.42204	0.00163088	-0.460281	0.00896
1376	CPT2	0.663434	0.00659918	0.584066	0.00901532	0.377725	0.0089
65244	SPATS2	-1.31164	9.95e-05	-0.964413	0.000400004	0.564214	0.0089
9885	OSBPL2	-0.664263	0.00551841	-0.963347	0.00652586	0.510476	0.00889
9860	LRIG2	-1.555	0.00327768	-1.94114	0.000457318	-0.641082	0.00886
23646	PLD3	0.966338	0.0221942	1.31001	0.00252477	1.00243	0.00885
56005	MYDGF	0.504153	0.048235	0.480821	0.0438268	0.422539	0.00884
150962	PUS10	-1.11694	0.00234131	-1.48866	0.000284379	-0.44116	0.00879
1544	CYP1A2	2.18571	0.00025	-1.50338	0.00168055	-0.462515	0.00878
64927	TTC23	-1.01526	0.0408588	0.50344	0.0251711	-0.438496	0.00876
138199	CARNMT1	-0.79622	0.0184139	-1.03324	0.00263713	-0.934934	0.00875
9738	CCP110	-0.758991	0.00537768	-0.708574	0.00519356	-0.506352	0.00875
10195	ALG3	0.590582	0.0133612	0.616598	0.00697204	0.449602	0.00866
91647	ATPAF2	1.0985	0.00179108	1.04706	0.00146172	0.373918	0.00864
8509	NDST2	1.66182	0.017512	1.69324	0.0107478	-0.886599	0.00863
8409	UXT	0.536766	0.0162923	0.51992	0.0131851	0.494939	0.00861
10098	TSPAN5	-0.734406	0.00405131	-1.3097	5.01431e-05	-0.617042	0.00859
23122	CLASP2	-1.565	0.000371	-1.43325	7.42606e-05	-0.446921	0.00859
50488	MINK1	-1.05156	0.00107774	-1.27259	0.000163838	0.414321	0.00854
9902	MRC2	0.565356	0.015508	0.563495	0.0106946	0.66797	0.00846
8303	SNN	0.565914	0.0461979	-0.930674	0.00198162	-0.470245	0.00843
10916	MAGED2	0.682196	0.00535831	0.796685	0.00125173	0.535156	0.00839
2188	FANCF	-1.00801	0.0042247	-0.873058	0.00639683	-0.930173	0.00835
6749	SSRP1	0.715238	0.00412038	0.827023	0.000997219	0.437094	0.00835
327	APEH	0.567834	0.030795	0.53481	0.0293635	0.439209	0.00835
55689	YEATS2	-0.989991	0.0192968	-0.785368	0.0422686	-0.729481	0.00834
83891	SNX25	-0.924841	0.00667301	-1.28648	0.000492862	-0.624442	0.00833
84162	KIAA1109	-1.09958	0.00508851	-1.40783	0.000635579	-0.600441	0.00833
55732	C1ORF112	-0.680151	0.0136168	-1.66161	2.47305e-05	-0.465618	0.00833
26048	ZNF500	-1.18819	0.00858553	-0.98443	0.0163511	0.378106	0.00833
51069	MRPL2	0.881901	0.020476	0.963433	0.00856373	0.438135	0.00831
8763	CD164	0.454432	0.0393366	0.477877	0.0219535	0.375275	0.00822
387263	C6ORF120	-0.848924	0.00319571	-0.987999	0.000719108	-0.810099	0.00821
55755	CDK5RAP2	-1.05579	0.020686	-0.804693	0.00112304	-0.401203	0.0082
8315	BRAP	-0.793111	0.0443242	1.2327	0.000227956	-0.493393	0.00819
339500	ZNF678	-2.01477	0.00636777	-1.93402	0.00521631	-0.38424	0.00819
11193	WBP4	-2.61826	3.62e-05	-1.0621	0.00705102	-0.479597	0.00816
3621	ING1	-1.52063	0.000205	-1.11542	0.000670991	-0.740439	0.00812
64756	ATPAF1	0.61629	0.00999669	-1.18536	0.00824253	0.492846	0.00812
340542	BEX5	1.0356	0.00054	1.12749	0.000161745	0.756307	0.00811
64718	UNKL	0.931625	0.00554919	-0.502403	0.0432225	0.443276	0.00806
4258	MGST2	0.841808	0.00364401	-0.515196	0.035919	0.397803	0.00804
79083	MLPH	-0.834889	0.0046745	-0.966193	0.00114329	0.524577	0.00804
4728	NDUFS8	0.493762	0.0135866	0.683111	0.00121226	0.422235	0.00803
5264	PHYH	1.53237	0.00129775	1.05652	0.00803002	0.712342	0.00803
23223	RRP12	0.938872	0.0355877	0.549136	0.0129415	-0.426426	0.00802
4928	NUP98	-1.50463	0.00035	-1.89246	3.92838e-05	-0.441515	0.008
55845	BRK1	0.90285	0.00295608	1.04071	0.000701214	0.455435	0.00791
55676	SLC30A6	-0.527496	0.0439193	-0.915905	0.00129564	-0.73181	0.00789
5500	PPP1CB	0.877714	0.00813037	0.578196	0.0124916	0.484737	0.00789
51635	DHRS7	0.654452	0.00419118	0.643207	0.00290625	0.445586	0.00787
55388	MCM10	-0.690756	0.0102673	-1.24762	0.000135845	-0.428551	0.00786
9184	BUB3	-0.935957	0.00054	-1.40407	1.85473e-05	-0.413998	0.00786
3956	LGALS1	0.612337	0.00705359	0.46768	0.0209112	0.478955	0.00786
58497	PRUNE1	-0.789524	0.00387306	-1.06929	0.00764955	-0.391063	0.00783
286410	ATP11C	-0.900276	0.00876599	-2.87361	2.64525e-06	-0.532281	0.00776
57082	KNL1	-1.52709	0.000326	-2.30999	1.07226e-05	-0.555516	0.00775
26503	SLC17A5	-1.65465	0.00327649	-1.9625	0.000226227	-0.544227	0.00772
5480	PPIC	0.681235	0.00500832	0.486193	0.0219903	0.507468	0.00768
57018	CCNL1	-1.03178	0.000561	-1.49949	0.000424358	0.56584	0.00762
51263	MRPL30	0.489532	0.032371	0.523612	0.0161692	0.476925	0.0076
57522	SRGAP1	-2.69973	1.6e-05	-3.2094	2.63658e-06	-0.736822	0.00758
10897	YIF1A	0.465534	0.0476728	1.41564	3.17859e-05	0.425088	0.00758
50485	SMARCAL1	-0.642872	0.0051338	-0.649132	0.00304569	0.443389	0.00758
4288	MKI67	-0.685136	0.00698684	-0.798755	0.00171089	-1.40899	0.00754
55968	NSFL1C	0.875725	0.000773	1.02289	0.00782454	0.368753	0.00754
221545	C6ORF136	1.06396	0.0259751	0.944852	0.0329378	0.431188	0.0075
5699	PSMB10	0.748205	0.0290419	1.11544	0.00195216	0.450971	0.00747
23229	ARHGEF9	0.533906	0.0427656	0.76568	0.00422242	0.648202	0.00747
84950	PRPF38A	1.50469	0.000182	0.825346	0.000930197	0.661436	0.00747
7267	TTC3	0.458482	0.0286922	-1.23356	0.00143303	0.379675	0.00744
10983	CCNI	0.600803	0.0113524	1.23455	6.42747e-05	0.662264	0.00742
84261	FBXW9	1.01921	0.000552	1.78385	6.90463e-06	0.508664	0.00738
9859	CEP170	-2.59188	0.000633	-2.09349	0.00148229	-0.410808	0.00737
65264	UBE2Z	0.70987	0.0486804	1.39615	0.000652435	0.493723	0.00737
80315	CPEB4	-1.01743	0.0118879	-1.47575	0.000747432	-0.502071	0.00733
55140	ELP3	-1.25414	0.0039585	-1.05478	0.00712497	-0.656311	0.00729
140823	ROMO1	0.491547	0.0196988	0.815587	0.00056923	0.43112	0.00729
3842	TNPO1	0.828332	0.0087542	-0.868715	0.0127605	-0.600877	0.00727
79840	NHEJ1	-0.941577	0.0220223	-1.09678	0.00639668	-0.629423	0.00726
25782	RAB3GAP2	-1.15869	0.00113505	-1.33522	0.000245976	-0.583746	0.00724
90121	TSR2	0.750984	0.00449084	0.967017	0.000528936	0.530172	0.00721
23528	ZNF281	-1.30702	0.000624	-1.15468	0.000801367	-0.489932	0.00719
114991	ZNF618	-1.20995	0.000695	-1.40404	0.000135668	-0.681352	0.00717
381	ARF5	0.814119	0.00187461	0.917499	0.000497309	0.487943	0.00717
57530	CGN	-1.11072	0.00304343	-2.05338	6.43754e-05	0.56759	0.00716
79882	ZC3H14	-1.22759	0.00027	-1.30774	5.23505e-05	-0.37509	0.00714
6470	SHMT1	0.434082	0.0346061	-0.517056	0.00963125	0.454991	0.00714
10327	AKR1A1	0.736925	0.00567225	1.84564	7.6283e-06	0.458647	0.00714
22800	RRAS2	-2.40914	1.94e-05	-2.41936	9.24091e-06	-0.434755	0.00711
10973	ASCC3	-0.644571	0.0307489	-2.3002	5.83641e-06	-0.655425	0.00709
3660	IRF2	-0.742355	0.0460066	-0.781736	0.0260625	-0.625511	0.00708
2932	GSK3B	-1.89028	6.31e-05	-1.99425	2.12975e-05	-0.476589	0.00701
9761	MLEC	1.15782	9.95e-05	1.5257	7.72896e-06	0.408746	0.007
6993	DYNLT1	0.640768	0.00352389	0.811374	0.000449179	0.48215	0.00699
23480	SEC61G	0.588883	0.0103771	0.534998	0.0119196	0.435317	0.00688
2495	FTH1	0.825871	0.0011916	1.07522	0.000110809	0.384896	0.00686
5935	RBM3	1.67042	5.23e-05	0.57181	0.023937	-0.379853	0.00684
100128731	OST4	0.63714	0.00311528	0.619573	0.00228986	0.408017	0.00684
55791	LRIF1	-1.43342	0.00111264	1.04405	0.00500628	-0.499361	0.00681
2017	CTTN	1.38575	0.00135015	2.09928	4.57452e-05	0.483284	0.00681
154810	AMOTL1	-0.939202	0.0027479	-1.12246	0.000503072	-0.703232	0.00679
2677	GGCX	0.651659	0.0161373	0.855035	0.00242187	0.549151	0.00678
64210	MMS19	0.632799	0.011718	1.01901	0.000359117	0.414398	0.00677
51341	ZBTB7A	-1.63127	7.85e-05	-1.44371	0.00119134	-0.70178	0.00675
4521	NUDT1	1.00861	0.000227	0.819396	0.000495969	0.445394	0.00675
22821	RASA3	-1.5295	0.000283	-1.41399	0.000256146	0.519983	0.00675
2099	ESR1	-2.67872	1.46e-06	-3.69932	1.16105e-07	-0.398077	0.00671
1906	EDN1	-1.75052	0.000384	-0.804492	0.0260441	0.525193	0.0067
7328	UBE2H	-1.24503	0.000613	-0.744619	0.00917698	0.424877	0.00666
23596	OPN3	0.857941	0.0055146	1.04871	0.000951547	0.622332	0.00666
6426	SRSF1	-1.1246	0.000857	-2.39304	3.08509e-06	-0.726097	0.00664
54915	YTHDF1	-0.50587	0.0302949	0.54588	0.0143133	-0.804087	0.00663
4289	MKLN1	-1.544	0.000135	-1.22217	0.00033648	-0.864174	0.00661
119391	GSTO2	0.566272	0.0119869	0.919928	0.00034761	0.566359	0.00661
10725	NFAT5	-1.76113	1.28e-05	-1.9073	3.78195e-06	-0.440439	0.00657
5860	QDPR	0.644406	0.00980804	0.87498	0.000925641	0.570094	0.00656
285315	C3ORF33	-0.974197	0.00235248	-0.56086	0.0342056	-0.718012	0.00651
54464	XRN1	-1.21768	0.00518489	-2.96086	8.42932e-06	-0.591165	0.00649
23506	BICRAL	-1.53775	0.000111	-2.49483	2.85821e-05	-1.10917	0.00647
5954	RCN1	0.86405	0.000441	1.95829	1.16259e-06	0.39858	0.00641
55253	TYW1	-1.85893	0.000162	-2.17884	2.82671e-05	-0.565356	0.00636
518	ATP5MC3	0.902664	0.00363719	-0.606041	0.00368507	0.547832	0.00636
5134	PDCD2	1.21319	0.00111162	0.919102	0.00392908	0.411086	0.00635
9117	SEC22C	-2.16634	0.000445	1.08209	0.00019846	-0.691143	0.0063
55143	CDCA8	-1.26775	0.000656	-0.552678	0.0484153	-0.917188	0.00629
23609	MKRN2	-0.473931	0.0300842	1.36553	3.55242e-05	-0.504205	0.00628
8407	TAGLN2	0.623484	0.00422135	-0.593114	0.00361413	0.384849	0.00628
3028	HSD17B10	0.718017	0.00195186	0.433718	0.0234326	0.433789	0.00626
10171	RCL1	-1.99851	0.000167	-1.39263	0.00102048	-0.600226	0.00623
7486	WRN	-1.08417	0.0243064	-1.50416	0.00245181	-0.673903	0.00622
55785	FGD6	-1.17189	0.000331	-1.04524	0.000393821	-0.52605	0.00621
2122	MECOM	-1.46364	0.000523	-1.61779	0.000359565	-0.395992	0.00617
192669	AGO3	-1.01108	0.000689	-0.634152	0.00772576	-0.649765	0.00615
140890	SREK1	0.671968	0.00357736	0.690904	0.00184857	-0.453838	0.00614
55729	ATF7IP	-1.81241	0.000823	1.08085	0.000161806	-0.635364	0.00612
9882	TBC1D4	-0.887056	0.00317717	-1.55699	4.23946e-05	-0.644557	0.00611
22921	MSRB2	0.448225	0.0452516	1.19985	6.96471e-05	0.574579	0.00611
155054	ZNF425	0.932441	0.00621624	1.91142	3.15854e-05	0.651245	0.0061
9497	SLC4A7	-2.10832	5.12e-05	-3.05011	2.23496e-06	-0.72866	0.00607
8819	SAP30	-1.97257	0.000165	-1.55819	0.000427214	-0.768033	0.00606
11017	SNRNP27	0.647714	0.00494567	1.12827	7.37791e-05	0.399541	0.00605
94101	ORMDL1	1.05121	0.00809942	0.941089	0.000184392	1.1147	0.00601
49855	SCAPER	-2.09254	0.00187484	-1.76395	0.00336516	-0.436592	0.00598
163589	TDRD5	-1.79482	0.00113182	-2.17497	0.000172505	-0.688609	0.00594
29058	TMEM230	0.723248	0.00404461	0.783319	0.000813712	0.505161	0.00592
10410	IFITM3	0.750067	0.00389339	0.742869	0.00256343	0.649872	0.00592
157	GRK3	-1.5399	0.0210079	-1.729	0.0075069	0.76912	0.0059
5872	RAB13	0.556279	0.0104127	0.629441	0.00322821	0.431753	0.00588
11267	SNF8	0.680868	0.00718537	0.76207	0.00229095	0.461254	0.00587
23131	GPATCH8	-2.41967	7.3e-05	-1.41282	0.00140529	-0.647714	0.00586
8678	BECN1	0.786126	0.008765	0.894326	0.00256717	0.433428	0.00586
7957	EPM2A	-0.700167	0.00551841	-0.614062	0.0077348	-0.645509	0.00584
4074	M6PR	0.583912	0.0079507	0.922579	0.000250789	0.469854	0.00581
6733	SRPK2	-1.83891	1.28e-05	-2.84822	1.64667e-06	-0.602248	0.0058
340481	ZDHHC21	-0.545434	0.0487606	-2.09015	6.57828e-05	-0.727896	0.00579
2512	FTL	0.957129	0.000367	0.792257	0.000731426	0.391167	0.00579
21	ABCA3	0.854029	0.00115138	0.500707	0.0177585	0.574564	0.00579
51428	DDX41	0.761326	0.00338655	0.920699	0.000589281	0.59737	0.00579
57103	TIGAR	0.871195	0.00128842	0.591828	0.00867926	-0.615003	0.00577
63874	ABHD4	1.58933	0.00105281	0.821228	0.0312034	0.800817	0.00576
29894	CPSF1	0.748843	0.00386618	1.115	0.000160668	0.661294	0.00575
285672	SREK1IP1	0.732612	0.0348166	-1.50802	0.00181507	-1.41116	0.00571
25824	PRDX5	0.706492	0.00312668	1.25636	2.64778e-05	0.489992	0.00571
219654	ZCCHC24	-1.16939	0.0023062	-1.30676	0.000657936	0.619259	0.00569
10491	CRTAP	0.832479	0.0368385	0.862728	0.0220019	0.421935	0.00568
25828	TXN2	0.80387	0.00555112	0.57981	0.0226742	0.511393	0.00567
84083	ZRANB3	-2.19864	0.000259	-2.83369	2.39813e-05	-0.527171	0.00566
831	CAST	0.622238	0.0121098	-0.571021	0.0131686	0.433764	0.00566
6248	RSC1A1	0.530936	0.0268971	1.47763	2.49899e-05	-0.659219	0.00563
1719	DHFR	1.06393	0.000565	0.789216	0.00229605	0.551917	0.0056
5037	PEBP1	0.793024	0.00169143	0.93572	0.000323634	0.515143	0.00559
55578	SUPT20H	-1.81299	8.9e-06	-0.445353	0.0320427	-0.56938	0.00556
27304	MOCS3	-0.827147	0.00601066	-1.45583	8.52044e-05	-0.864283	0.00552
112724	RDH13	-1.18699	0.0232803	-1.35879	0.00755274	-0.618834	0.00551
84216	TMEM117	-1.91679	0.000218	-2.74003	1.01516e-05	-0.845779	0.0055
5007	OSBP	-1.10813	0.000257	0.984938	0.00113801	-0.791418	0.0055
79591	ARMH3	-0.695138	0.0103398	-0.999923	0.000665077	0.408383	0.00547
9887	SMG7	0.5147	0.0341346	1.27357	7.78855e-05	0.739912	0.00546
54497	HEATR5B	-1.73916	0.00776863	-2.7489	0.000242687	-0.920781	0.00545
22894	DIS3	1.53117	0.00409038	0.778362	0.00167991	-0.652632	0.00542
23512	SUZ12	-0.883916	0.001654	-1.20908	0.000112034	-0.469912	0.00541
1479	CSTF3	-0.589684	0.0461142	-1.35411	0.000595503	-0.450723	0.00537
5720	PSME1	0.716692	0.00278338	0.476965	0.0189891	0.474531	0.00536
79657	RPAP3	-0.587699	0.0336675	-1.70767	2.56519e-05	-0.421383	0.00535
7453	WARS	0.406033	0.0460679	1.41549	5.03255e-05	0.41656	0.00535
8798	DYRK4	0.626952	0.0313761	1.38573	0.000148658	0.409237	0.00529
79613	TANGO6	-1.05206	0.0428989	-1.19779	0.0160678	0.505646	0.00527
9538	EI24	0.999055	0.000421	0.708535	0.00315867	0.687699	0.00525
7586	ZKSCAN1	1.14649	0.000118	2.47157	5.21171e-07	0.503154	0.00522
11201	POLI	-0.720655	0.032265	0.636931	0.0414897	0.663455	0.00522
8502	PKP4	-1.24744	0.0013244	-1.23919	5.34167e-05	0.620462	0.00521
6892	TAPBP	1.03637	0.00162105	1.3251	0.000175336	0.887587	0.00519
6882	TAF11	-0.500041	0.0260585	0.807539	0.013008	-0.477413	0.00518
6627	SNRPA1	1.12945	0.0387984	-0.595434	0.00835677	-0.416279	0.00516
1452	CSNK1A1	-0.701772	0.00327649	-0.563042	0.0215683	-0.524754	0.00513
29893	PSMC3IP	0.960412	0.000312	1.53912	7.02047e-06	0.594712	0.00509
3146	HMGB1	0.669516	0.0033931	-0.48956	0.0136893	0.428499	0.00506
51427	ZNF107	-1.81325	0.00128204	-1.89948	0.000545433	-1.16905	0.00501
81563	C1ORF21	-0.63294	0.0213363	-1.58034	3.81078e-05	0.416958	0.00501
151648	SGO1	-0.703322	0.0108498	-1.37261	8.58304e-05	-0.49272	0.005
7014	TERF2	-0.833716	0.0212569	1.04919	0.00382472	0.584657	0.00497
157697	ERICH1	-1.70795	0.00204079	-2.07824	0.000320621	-0.460884	0.00496
51293	CD320	0.924393	0.00240709	0.801439	0.003624	0.440472	0.00496
25796	PGLS	0.630564	0.00776382	1.04943	0.00016923	0.540399	0.00493
9686	VGLL4	-1.86298	9.47e-06	-0.722976	0.0026099	-0.464569	0.00491
9812	DELE1	1.57	0.00056	2.37103	1.83335e-05	0.651354	0.0049
30000	TNPO2	0.749245	0.0096643	1.72293	3.01841e-05	0.505732	0.00489
23248	RPRD2	-1.75972	0.00015	-1.49852	0.000228792	-0.626655	0.00488
8725	URI1	0.959655	0.0478874	-0.772715	0.00148203	-0.545779	0.00488
51496	CTDSPL2	-1.40247	0.000103	-1.0964	0.000271871	-0.700057	0.00486
6891	TAP2	1.00934	0.00863906	1.60224	0.000269939	0.577168	0.00484
51454	GULP1	-1.54479	0.00114836	-1.888	0.000164823	0.516942	0.0048
55630	SLC39A4	0.808822	0.00533891	0.905052	0.00164866	0.428101	0.00479
196441	ZFC3H1	-0.761369	0.00370936	-1.93077	4.44835e-06	-0.602373	0.00478
29068	ZBTB44	-1.18957	0.00232913	-1.30869	0.000740516	-0.63558	0.00477
3308	HSPA4	-0.432934	0.0309996	-1.8112	7.00523e-06	-0.440573	0.00477
7029	TFDP2	-1.05274	0.00061	-0.514465	0.0269169	0.701165	0.00477
122953	JDP2	-1.7295	0.00014	1.2463	0.000675115	-0.726848	0.00474
1716	DGUOK	0.696075	0.00327812	1.30338	2.84092e-05	0.438394	0.00472
493856	CISD2	0.48286	0.0321278	0.681344	0.00315462	0.411944	0.0047
4773	NFATC2	-2.41248	2.6e-05	-2.47719	1.06661e-05	-0.82067	0.00468
54822	TRPM7	-1.03701	0.00308052	-2.14739	1.91108e-05	-0.514177	0.00466
65003	MRPL11	0.7291	0.0043867	0.506251	0.0225008	0.637604	0.00465
25902	MTHFD1L	-0.554306	0.0152524	1.33817	2.97095e-05	-0.417947	0.00464
22902	RUFY3	-0.790418	0.0201926	-0.487387	0.0350313	0.659684	0.00464
80790	CMIP	-0.664235	0.00404438	-0.696427	0.00185489	0.636175	0.00462
22874	PLEKHA6	-0.949016	0.0128619	-1.00006	0.00632357	-0.464773	0.00461
4898	NRDC	0.614977	0.00646009	0.529779	0.010023	0.583743	0.00461
26575	RGS17	-1.27743	0.0164502	-1.18715	0.0166764	-0.870009	0.00459
1978	EIF4EBP1	0.519185	0.0195594	2.13206	1.42781e-06	0.416312	0.00459
26267	FBXO10	-1.17836	0.000622	-1.08717	0.000593326	-0.720701	0.00458
1075	CTSC	1.02873	0.00130065	0.6709	0.0361086	-1.29544	0.00456
23143	LRCH1	-1.74661	0.000302	-1.47107	0.000528222	-0.873855	0.00455
6294	SAFB	-0.735535	0.00636244	-1.5576	2.59868e-05	-0.502081	0.00454
9682	KDM4A	-0.887759	0.0188814	1.49151	0.00036272	0.459091	0.00453
427	ASAH1	0.656093	0.00343225	0.836604	0.00119311	0.570619	0.00453
51125	GOLGA7	0.665211	0.00270476	0.850721	0.000310398	0.480348	0.00452
22992	KDM2A	-1.11628	0.000224	-1.13436	0.00010139	0.604482	0.00452
84440	RAB11FIP4	-0.989337	0.0143678	-1.10458	0.00504355	-0.588839	0.00451
51097	SCCPDH	0.542266	0.0336213	0.83913	0.0018698	0.61942	0.00449
10240	MRPS31	-1.21787	0.000111	-1.62793	7.84059e-06	-0.481	0.00448
140862	ISM1	-0.962385	0.0245784	-2.61466	2.6087e-05	-0.980122	0.00445
9578	CDC42BPB	-1.0414	0.0444066	-1.69968	0.0019652	0.474139	0.00444
84991	RBM17	1.52455	0.000135	1.12013	0.000562569	0.64967	0.00444
8065	CUL5	-0.499781	0.0254018	1.16797	0.000711805	-0.493281	0.00442
79161	TMEM243	-0.426573	0.042051	-0.828648	0.000565858	-0.475572	0.00441
27030	MLH3	-0.709657	0.0107374	0.703584	0.00861448	-0.623235	0.00439
6541	SLC7A1	-0.910813	0.000435	1.7317	8.74774e-06	-0.410025	0.00439
92014	SLC25A51	1.2207	0.000222	1.79141	8.77266e-06	-0.746842	0.00437
6727	SRP14	0.433461	0.0333595	0.610042	0.00337941	0.462605	0.00435
57117	INTS12	-0.812385	0.00202672	0.712437	0.00283477	-0.473347	0.00432
3030	HADHA	0.67497	0.0101839	0.504969	0.0438178	0.428888	0.00431
5565	PRKAB2	1.49922	5.49e-05	2.54941	9.70911e-07	0.633036	0.0043
9700	ESPL1	-1.38441	0.000115	-1.81515	9.28132e-06	-0.487275	0.00429
11332	ACOT7	0.70156	0.0410233	-1.57648	0.000196958	0.451899	0.00429
10296	MAEA	-1.05731	0.000357	-1.1738	9.29217e-05	-0.513346	0.00428
175	AGA	0.766271	0.00650927	0.668753	0.011306	0.446413	0.00428
1347	COX7A2	0.755377	0.00266506	1.05899	0.000159876	0.489799	0.00428
1390	CREM	-0.612559	0.0183805	1.06752	0.00290625	-0.703202	0.00427
64215	DNAJC1	-0.91596	0.000909	-0.77123	0.0124494	-0.469749	0.00427
821	CANX	1.01299	0.00428479	0.994481	0.00299727	0.425593	0.00421
114327	EFHC1	-1.64683	0.00350014	-2.09857	0.000425831	0.439936	0.0042
23787	MTCH1	0.467983	0.0306132	0.502102	0.0149569	0.458586	0.00416
25771	TBC1D22A	-0.733104	0.00445582	-1.35989	4.25606e-05	0.547348	0.00416
11112	HIBADH	0.729242	0.00230989	0.404166	0.0402803	0.459456	0.00415
58492	ZNF77	-0.804197	0.0290384	1.23235	9.93113e-05	0.475713	0.00414
6542	SLC7A2	-0.816293	0.00691358	-1.04359	0.000916577	-0.570433	0.00413
9296	ATP6V1F	0.674834	0.00373646	0.752894	0.00113855	0.467814	0.00411
254427	PROSER2	-1.17255	0.000467	1.07714	0.000457659	-0.64838	0.00408
64847	SPATA20	0.952557	0.00209674	2.0611	6.81747e-06	0.825358	0.00407
23109	DDN	0.641795	0.0174512	1.19493	0.000216086	1.11374	0.00407
7150	TOP1	-0.529652	0.0108471	-0.898182	0.000225634	-0.561535	0.00406
9231	DLG5	-0.796193	0.00120366	-0.869225	0.000383621	-0.524778	0.00406
64779	MTHFSD	-1.18437	0.00127926	2.71772	1.92001e-05	-1.0655	0.00401
5268	SERPINB5	6.02645	1.2e-08	1.41924	4.36448e-05	1.18148	0.00398
57095	PITHD1	0.508367	0.0204682	0.881844	0.000439701	0.485769	0.00396
64419	MTMR14	-0.65659	0.023922	-0.822671	0.00455445	-1.68329	0.00395
11137	PWP1	-0.406941	0.0488936	-0.564816	0.00618336	-0.461415	0.00394
56984	PSMG2	-0.574491	0.00731308	-0.848896	0.000362004	-0.435236	0.00393
10591	DNPH1	0.915623	0.000652	1.59874	8.33749e-06	0.50298	0.00393
3760	KCNJ3	-1.02647	0.0353326	-0.958815	0.0350842	-0.504558	0.00391
28981	IFT81	-0.6997	0.0406304	-1.14769	0.00167449	0.589243	0.00388
29927	SEC61A1	0.86973	0.000741	0.838319	0.000530038	0.467966	0.00387
25873	RPL36	0.513391	0.020517	0.861107	0.00055766	0.531342	0.00386
8850	KAT2B	-0.748883	0.0103709	-1.49874	6.87276e-05	0.488089	0.00385
38	ACAT1	0.791166	0.00108203	0.63869	0.00254889	0.436305	0.00382
51690	LSM7	0.456643	0.0305038	0.514777	0.0113457	0.442208	0.00382
391356	PTRHD1	0.672435	0.00373646	0.58774	0.00535343	0.453581	0.00382
3781	KCNN2	-1.23538	0.0012737	-1.44427	0.000252386	-0.964001	0.0038
84549	MAK16	-0.888257	0.00104414	0.465571	0.0289532	-0.459788	0.0038
23392	ECPAS	-0.866088	0.0204445	-1.29852	0.00118569	-0.675913	0.00379
4649	MYO9A	-1.08806	0.00381731	-1.38445	0.000475745	-0.543444	0.00378
151393	RMDN2	-0.685853	0.0462978	-0.639134	0.0465575	-1.10093	0.00376
165055	CCDC138	-1.27025	0.0392566	-1.76378	0.00457098	-0.928138	0.00375
84181	CHD6	-2.52068	1.86e-05	-2.77156	4.86669e-06	-0.792114	0.00375
3978	LIG1	0.767027	0.0037475	-0.620571	0.0085025	0.494474	0.00375
3831	KLC1	-0.888081	0.00622064	0.649459	0.0232927	0.523508	0.00375
7750	ZMYM2	-1.78081	1.44e-05	-1.4819	2.35637e-05	-0.6822	0.00374
5537	PPP6C	-1.09634	0.014249	-2.46828	4.57621e-05	0.495241	0.00374
90850	ZNF598	0.880739	0.0420929	1.47786	0.00121869	0.474776	0.00373
7181	NR2C1	-1.50493	0.0032164	-1.85118	0.000496123	-0.768473	0.00372
384	ARG2	1.26046	0.00014	1.94777	3.98947e-06	0.67172	0.00367
51194	IPO11	-0.71878	0.0207463	-3.10768	1.1405e-06	-0.825135	0.00366
8452	CUL3	-1.03196	0.000311	-2.19272	0.000210821	-0.440658	0.00366
84318	CCDC77	-0.580902	0.0126428	-0.959081	0.000330842	-0.760684	0.00362
140739	UBE2F	-0.727468	0.00874077	-0.489523	0.045966	0.437789	0.00361
2194	FASN	0.51741	0.0465546	0.676722	0.0082148	0.608335	0.00361
80013	MINDY3	-0.496875	0.0345443	-0.646061	0.00575228	-0.538825	0.0036
55128	TRIM68	0.718722	0.023201	2.80387	2.34548e-06	0.531537	0.0036
55692	LUC7L	1.22751	0.00176375	0.957614	0.001438	-0.513995	0.00359
10600	USP16	-0.530882	0.021769	-0.764371	0.0016794	-0.485336	0.00359
54849	DEF8	0.714259	0.00195581	1.69007	3.00635e-05	0.492035	0.00358
2873	GPS1	0.743646	0.00726523	0.721504	0.0056163	0.674884	0.00358
85865	GTPBP10	-0.634061	0.0104477	1.29638	6.0342e-05	-1.021	0.00357
6950	TCP1	0.545706	0.0192315	0.822971	0.0129462	0.470174	0.00357
55540	IL17RB	1.39742	0.000226	1.17844	0.000377427	0.565809	0.00357
84725	PLEKHA8	-2.34827	1.13e-05	-2.50661	3.67111e-06	-0.710228	0.00356
56242	ZNF253	-1.3475	0.0007	-1.17979	0.000957611	-0.864246	0.00355
23479	ISCU	0.906948	0.000383	1.09688	5.66013e-05	0.454366	0.00355
9785	DHX38	1.38858	0.000139	1.56785	3.08234e-05	0.613732	0.00355
57684	ZBTB26	-1.64882	0.0036573	-1.59245	0.00282015	-0.527391	0.00354
84316	NAA38	0.652942	0.00302677	0.794828	0.000496187	0.481295	0.00354
5465	PPARA	-0.788132	0.0141091	-1.1828	0.00073175	-0.54335	0.00353
51248	PDZD11	0.980893	0.000457	0.885655	0.000503265	0.496026	0.00353
388722	C1ORF53	1.26618	8.79e-05	1.20186	6.10632e-05	0.60252	0.00353
51667	NUB1	0.877221	0.00122125	1.70101	7.95694e-06	0.623288	0.00351
9331	B4GALT6	-2.37836	0.00108968	-2.94502	0.000141862	-0.722216	0.00349
29843	SENP1	-1.03839	0.00591735	-1.01747	0.00426552	-0.48988	0.00348
128061	C1ORF131	-0.645114	0.00841794	-0.531955	0.0164484	-0.454354	0.00347
54919	DNAAF5	0.930569	0.00688909	-0.872949	0.00049804	0.592655	0.00347
65094	JMJD4	-1.11524	0.00422909	-1.17774	0.00186219	-0.746664	0.00346
57335	ZNF286A	0.603498	0.0125948	0.647632	0.00553803	0.59543	0.00346
81550	TDRD3	-1.37814	0.00417545	-1.28555	0.000622539	-0.913444	0.00343
55112	WDR60	-1.83769	0.00036	-2.16828	6.26348e-05	-0.475212	0.00342
23301	EHBP1	-2.02405	5.21e-05	-2.11292	1.85628e-05	-0.477956	0.00341
220002	CYB561A3	0.937895	0.00104394	0.901237	0.000783658	0.478759	0.0034
23243	ANKRD28	-1.09447	0.00139619	-1.96035	1.54818e-05	-0.47901	0.00338
65109	UPF3B	0.605593	0.00688957	0.961891	0.000202352	0.515296	0.00338
23475	QPRT	0.682613	0.00221956	2.03519	1.0115e-06	0.589396	0.00338
54014	BRWD1	-2.28853	0.000459	-2.41637	1.83698e-05	-0.899712	0.00337
1826	DSCAM	-1.81815	0.000317	-2.5845	5.90337e-05	-0.666286	0.00335
7625	ZNF74	1.2518	0.00169451	1.86369	6.54337e-05	-0.578485	0.00335
8050	PDHX	-0.653661	0.00311455	-0.500327	0.00979149	-0.564836	0.00335
7597	ZBTB25	-1.30161	0.000481	-1.10449	0.000811618	-0.592855	0.00334
59349	KLHL12	-0.618216	0.013334	0.712746	0.00381554	-0.474167	0.00333
57007	ACKR3	-2.28388	1.57e-05	-2.97164	1.48406e-06	-0.483269	0.00332
57678	GPAM	1.26377	0.000276	1.57285	3.30253e-05	-0.497499	0.0033
51255	RNF181	0.463496	0.0217193	0.776016	0.000607306	0.518869	0.0033
54996	MARC2	0.787846	0.0225218	1.34243	0.000568883	0.646648	0.00329
1946	EFNA5	-1.17323	0.011712	-1.60058	0.00111202	-0.982468	0.00328
6421	SFPQ	-0.578496	0.00920772	-2.14539	1.8224e-06	-0.488982	0.00328
8301	PICALM	-0.893652	0.00154779	-1.32659	6.06356e-05	-1.25225	0.00327
79000	AUNIP	-0.916547	0.00368665	0.860895	0.00335018	-0.755546	0.00326
50848	F11R	0.47228	0.0241399	1.35492	1.78578e-05	0.62019	0.00326
119032	BORCS7	1.08038	0.000853	0.919801	0.00143049	0.563003	0.00324
26127	FGFR1OP2	-0.56235	0.0299491	0.67685	0.00759997	0.67926	0.00323
84937	ZNRF1	-1.23485	0.000141	-1.67319	9.373e-06	-0.706492	0.00322
56475	RPRM	-1.21834	0.00109295	-1.06793	0.00152229	-0.521098	0.00322
125150	ZSWIM7	0.486246	0.0274105	0.564535	0.00846124	0.462898	0.00322
64860	ARMCX5	-1.25408	0.000271	1.14625	0.000266064	-0.810908	0.00321
10914	PAPOLA	-0.597625	0.0452011	-0.839992	0.00513921	-0.485459	0.0032
10652	YKT6	0.533316	0.0459157	0.920964	0.00142912	0.568096	0.0032
79856	SNX22	0.783524	0.0363878	0.803209	0.0229539	0.79216	0.00318
54205	CYCS	1.55945	0.000277	1.52183	0.0125235	1.25083	0.00318
5782	PTPN12	-1.52236	6.36e-05	-1.33504	7.47606e-05	-0.54193	0.00317
9238	TBRG4	0.523413	0.0418759	0.557883	0.0220019	0.509667	0.00316
84068	SLC10A7	-1.53502	0.000555	-1.28291	0.00103001	-0.577599	0.00315
1894	ECT2	-0.990808	0.00104277	-1.88305	7.71075e-06	-0.52157	0.00315
54856	GON4L	-1.82467	0.000133	-0.946713	0.00526438	-0.471514	0.00315
285331	CCDC66	-0.898099	0.00431989	-0.558268	0.038196	-1.06035	0.00314
64216	TFB2M	-0.590049	0.0213024	-0.590595	0.0145956	-0.62717	0.00314
114883	OSBPL9	-0.732695	0.00227399	-0.971859	0.000196958	-0.465165	0.00314
7264	TSTA3	0.746975	0.00636777	0.612732	0.0129699	0.479674	0.00314
653784	MZT2A	0.584424	0.00737203	0.949447	0.000187889	0.473663	0.00309
7559	ZNF12	-0.752988	0.00584024	1.25531	6.25173e-05	0.523026	0.00307
23683	PRKD3	-1.43842	0.000179	-1.56459	5.16289e-05	-0.562857	0.00306
995	CDC25C	-0.918934	0.00850032	-1.38716	0.00895888	0.697522	0.00306
307	ANXA4	1.15479	0.000275	0.588219	0.0115245	0.654304	0.00305
7187	TRAF3	-1.57343	0.00306012	-2.25688	0.000159876	-0.517329	0.00304
23593	HEBP2	0.627805	0.00551841	1.1394	6.31772e-05	0.460726	0.00304
55771	PRR11	-0.644764	0.012417	0.694477	0.0232161	0.475718	0.00304
6419	SETMAR	0.774909	0.00352579	0.962059	0.000515375	0.533671	0.00304
283149	BCL9L	-1.09639	0.000265	-0.566336	0.0102394	-0.655537	0.00302
57724	EPG5	-1.86553	0.000152	-2.22669	2.33479e-05	-1.14439	0.00301
54972	TMEM132A	0.782779	0.0352734	0.88795	0.0129565	0.544778	0.003
5034	P4HB	0.54591	0.0247242	-0.398205	0.0493021	0.661788	0.003
79631	EFL1	-1.03275	0.00587473	-1.0853	0.00271968	-0.454263	0.00298
29117	BRD7	-0.573083	0.0143063	-0.946335	0.000386329	-0.556432	0.00297
55809	TRERF1	-2.06162	1.9e-05	-2.84286	1.24841e-06	-0.633787	0.00296
22916	NCBP2	0.606208	0.0156602	1.11416	0.000204872	0.458995	0.00296
79733	E2F8	-2.05038	0.000311	-1.8305	0.000363512	-0.593668	0.00295
11060	WWP2	-0.602714	0.0370995	-1.39257	0.00136953	0.482015	0.00295
55611	OTUB1	0.995511	0.00376195	1.06993	0.00025982	0.809242	0.00295
23774	BRD1	-2.34483	1.67e-05	-1.04009	0.00143769	-0.531476	0.00294
54556	ING3	-1.71681	6.69e-05	-1.54901	0.000378562	-0.835137	0.00293
9158	FIBP	0.52927	0.0255372	0.60253	0.00871385	0.463907	0.00293
1652	DDT	0.680362	0.00326848	0.70502	0.0016009	0.494715	0.00293
55269	PSPC1	-0.921371	0.00122289	-3.19284	3.17491e-07	-1.37306	0.00292
196527	ANO6	-0.81495	0.00473581	-1.99189	7.36824e-06	-0.530603	0.00291
51614	ERGIC3	0.735129	0.00162224	0.911347	0.000216946	0.467761	0.00291
51360	MBTPS2	-0.76331	0.00210981	-1.02321	0.00016923	-0.647864	0.0029
51312	SLC25A37	-1.07045	0.0120835	-1.2255	0.0035779	-0.507402	0.0029
57228	SMAGP	-0.526274	0.0329105	-0.481746	0.0359468	-0.484528	0.0029
60625	DHX35	-1.40529	0.00135602	-0.872492	0.015009	-0.887026	0.00288
7726	TRIM26	-0.765417	0.0114349	1.13339	8.47548e-05	0.47075	0.00287
55621	TRMT1	0.786555	0.00825684	1.05081	0.000637044	0.829614	0.00287
811	CALR	0.716584	0.0284518	0.411948	0.0406133	0.890476	0.00287
9373	PLAA	-0.660754	0.0399427	-0.822154	0.00392545	-0.544191	0.00285
83605	CCM2	-0.788447	0.0073685	-1.18907	0.000317053	-0.641967	0.00284
4358	MPV17	1.13294	0.000226	0.809369	0.00117009	0.466047	0.00284
54344	DPM3	1.12202	0.000375	1.5797	1.97604e-05	0.587698	0.00284
10069	RWDD2B	0.66539	0.00388245	2.18107	9.89457e-07	0.564039	0.00283
55558	PLXNA3	0.77198	0.0301749	0.786735	0.0193033	0.87086	0.00283
79670	TUT7	-2.04732	0.00170409	-2.75992	0.000128682	-0.548877	0.00282
51011	FAHD2A	0.710252	0.00571401	1.48607	2.48262e-05	0.517806	0.00282
127687	C1ORF122	0.460831	0.0332747	0.715538	0.00180376	0.490957	0.00281
1657	DMXL1	-1.85963	0.000804	-2.57368	4.84872e-05	0.550438	0.0028
4714	NDUFB8	0.786263	0.00159495	1.10137	9.14705e-05	0.830964	0.0028
10053	AP1M2	1.02675	0.000435	0.493438	0.022813	0.529269	0.00278
5514	PPP1R10	-1.2739	0.0012768	-1.48683	0.00107283	-1.14833	0.00277
400073	C12ORF76	1.85985	0.000116	3.41642	1.16259e-06	1.02418	0.00275
51478	HSD17B7	0.689927	0.00688192	1.64303	1.32132e-05	-0.693999	0.00273
10577	NPC2	0.63164	0.00871402	1.19093	8.32354e-05	0.482011	0.00272
7290	HIRA	-0.803408	0.011369	-1.04886	0.00143443	-0.600601	0.00271
2896	GRN	0.921398	0.000942	0.682485	0.00383304	0.635468	0.00269
9833	MELK	-0.989697	0.00074	-1.67654	1.13824e-05	-0.674936	0.00268
64788	LMF1	-1.05962	0.00966026	-0.996556	0.009106	0.690099	0.00268
8648	NCOA1	-1.15935	0.00398838	-3.49327	1.98725e-05	-0.599035	0.00265
493753	COA5	0.790861	0.00175393	1.38037	2.32146e-05	0.51257	0.00262
10979	FERMT2	-1.01579	0.000224	-1.69544	0.000191996	-0.851512	0.00261
23431	AP4E1	-0.611024	0.011932	-1.77817	7.34301e-05	-0.51741	0.00261
22818	COPZ1	0.474837	0.0385346	0.828744	0.00102211	0.500301	0.0026
9647	PPM1F	-1.12696	0.0152142	-1.27333	0.00500215	0.907081	0.00259
2639	GCDH	0.804681	0.0154705	1.23223	0.000718893	0.487952	0.00258
9516	LITAF	0.482601	0.0222805	0.598774	0.00593687	0.50728	0.00257
2690	GHR	-1.58526	0.00500247	-2.31673	0.00024976	0.773073	0.00257
4325	MMP16	-2.12397	0.000752	-2.64281	9.14705e-05	-0.559433	0.00254
57575	PCDH10	-3.24491	4.31e-06	-4.49836	3.47411e-07	-0.535197	0.00253
5318	PKP2	-1.2595	0.00558972	-1.94137	0.000194838	-1.38664	0.00252
7074	TIAM1	-2.18096	0.00644367	-2.68455	0.00108282	-1.33355	0.00252
51526	OSER1	-1.65943	7.73e-05	0.913045	0.000956771	0.532854	0.00252
6210	RPS15A	2.88186	3.14e-06	1.94992	1.64626e-05	0.839958	0.0025
84930	MASTL	-1.20984	0.00122594	-1.00399	0.00243886	-0.646408	0.00249
29115	SAP30BP	-0.600308	0.0121444	0.828526	0.00107569	-0.578025	0.00249
977	CD151	0.708058	0.00610047	0.529459	0.0204333	0.543606	0.00249
9474	ATG5	-1.09415	0.0007	-0.821152	0.00260584	-0.755176	0.00246
1352	COX10	-1.09839	0.00343481	-0.632916	0.0452253	-0.96323	0.00245
3419	IDH3A	-0.386488	0.0498603	-0.928791	0.000169036	-0.497251	0.00245
170622	COMMD6	0.716836	0.0029462	1.11032	8.99896e-05	0.524042	0.00245
2752	GLUL	1.25917	0.00037	0.90794	0.000286018	0.585735	0.00244
201627	DENND6A	-1.35136	0.00313565	-2.81364	1.34242e-05	-0.841673	0.00243
7746	ZSCAN9	-0.985052	0.0477405	-1.03413	0.0275497	-0.762401	0.00243
26019	UPF2	-0.79849	0.00421151	-0.804317	0.00250305	-0.624753	0.00243
4155	MBP	-1.40643	0.00882048	-1.13596	0.019166	-0.727081	0.00242
4259	MGST3	0.723334	0.00325185	0.676312	0.0030582	0.545648	0.00242
135154	SDHAF4	1.59163	0.000185	2.49914	4.71299e-06	0.782466	0.00242
7552	ZNF711	-1.00067	0.002273	0.868743	0.00338253	-0.872133	0.00241
9262	STK17B	-1.31412	0.00012	-0.608396	0.00939777	-0.683778	0.00241
23788	MTCH2	1.02218	0.000584	0.576401	0.0123266	0.506073	0.0024
22900	CARD8	-1.19113	0.0165551	-0.902616	0.0455603	0.727147	0.0024
10548	TM9SF1	0.478021	0.0287429	-0.670347	0.0306789	0.865878	0.00239
8317	CDC7	-0.657727	0.0301745	-0.84722	0.00512457	-0.933925	0.00238
153364	MBLAC2	-1.34805	0.00106152	-1.61045	0.000176808	-0.783681	0.00238
25888	ZNF473	-1.30481	0.0150688	1.27317	0.0116795	-0.609176	0.00238
10067	SCAMP3	0.458225	0.0285677	0.823374	0.000548868	0.563035	0.00238
4122	MAN2A2	1.22736	0.00466439	1.25522	7.47606e-05	1.4532	0.00238
10409	BASP1	-0.935468	0.000459	-0.472762	0.018334	-0.535976	0.00237
23331	TTC28	-1.08732	0.000649	-0.833117	0.0021372	-0.505588	0.00237
2021	ENDOG	0.952748	0.000336	0.480131	0.014518	0.508812	0.00237
81579	PLA2G12A	0.987409	0.00352576	1.07749	0.00123718	0.541931	0.00234
2314	FLII	0.824094	0.0029528	0.835642	0.000483276	0.518584	0.00233
23158	TBC1D9	-2.02834	4.42e-06	-1.36081	2.6087e-05	-0.47583	0.00232
2135	EXTL2	0.579382	0.0190746	0.597998	0.0109487	0.52946	0.00232
10437	IFI30	0.686739	0.00296072	0.389373	0.0435467	0.566066	0.00232
146923	RUNDC1	-1.43923	0.000268	-0.567388	0.0413481	-1.27719	0.00231
29946	SERTAD3	-1.43583	0.00353759	-0.902827	0.0307966	-0.578066	0.00231
5272	SERPINB9	0.508686	0.0343969	0.51904	0.0220977	0.728486	0.0023
162394	SLFN5	2.2014	7.02e-05	3.82541	1.03194e-06	0.968692	0.0023
965	CD58	-1.26112	9.57e-05	-1.29008	3.97762e-05	-1.00958	0.00229
9749	PHACTR2	-1.13009	0.00208105	-2.2715	1.09262e-05	-0.632788	0.00229
388677	NOTCH2NLA	-0.823722	0.00185714	-2.66622	2.45475e-05	-0.49035	0.00228
4853	NOTCH2	-0.854069	0.00280091	-1.28603	6.273e-05	-0.49035	0.00228
3099	HK2	-1.34782	0.000917	-1.77792	7.68254e-05	-0.657768	0.00227
4999	ORC2	-2.38402	3.31e-06	-1.47295	3.17859e-05	-0.477641	0.00227
54107	POLE3	0.612232	0.00614162	0.652922	0.00259829	0.473522	0.00226
25776	CBY1	0.498613	0.0292595	1.12558	0.000115865	0.513748	0.00226
9527	GOSR1	-0.876281	0.00123556	0.723518	0.00494068	-0.587213	0.00225
7587	ZNF37A	1.0792	0.00332162	1.29674	0.000603003	0.487538	0.00225
79671	NLRX1	0.900525	0.0225952	1.07579	0.00567202	0.517646	0.00225
84775	ZNF607	-1.63405	0.000283	-1.42582	0.00038389	-1.07282	0.00224
2530	FUT8	-1.54605	4.48e-05	-3.01241	4.02421e-07	-0.678293	0.00224
54908	SPDL1	-0.447634	0.0219087	0.490766	0.00905889	-0.498003	0.00224
145508	CEP128	-1.48584	0.000264	-3.06359	1.24841e-06	-0.641363	0.00222
10036	CHAF1A	-1.28006	0.000476	-1.85755	2.04787e-05	-0.588661	0.00221
84722	PSRC1	-1.54991	0.000277	-1.11735	0.00137749	-0.551687	0.00221
8776	MTMR1	-0.399284	0.0423796	-0.717607	0.000969993	-0.510946	0.00221
55316	RSAD1	0.636924	0.00990136	1.16495	0.000118726	0.660894	0.00221
56288	PARD3	-1.789	6.05e-05	-2.50325	4.96798e-06	-0.717591	0.0022
1676	DFFA	0.429166	0.0465418	0.542117	0.0100135	0.650688	0.0022
23241	PACS2	0.845415	0.0125041	0.807098	0.0109034	0.690406	0.00219
23077	MYCBP2	-0.829904	0.0132764	-2.45633	6.85212e-06	-0.630556	0.00218
5194	PEX13	-0.709459	0.0103179	-0.715266	0.0344081	-0.565504	0.00218
7594	ZNF43	-1.09605	0.000814	-1.34899	0.000107338	-0.730424	0.00217
79915	ATAD5	-1.57734	0.000428	-1.5811	0.000227455	-1.13113	0.00216
23119	HIC2	-0.712429	0.015802	-1.49392	8.42804e-05	-0.532017	0.00215
1389	CREBL2	0.491587	0.0311176	0.595402	0.00769482	0.570728	0.00215
145748	LYSMD4	1.15448	0.00312488	0.813624	0.0155268	0.800884	0.00215
57634	EP400	-1.51437	0.00637136	-1.31225	0.00377774	-0.464994	0.00214
9836	LCMT2	-1.08498	0.00992733	-1.1806	0.00392111	-0.532524	0.00213
55163	PNPO	0.594586	0.00853906	1.11671	8.34304e-05	0.788503	0.00213
22852	ANKRD26	-0.993212	0.0188051	-0.98425	0.0135173	-0.904342	0.00212
1534	CYB561	0.5019	0.045579	0.704686	0.00522748	0.968266	0.00212
9989	PPP4R1	-0.79033	0.00181343	-1.24474	4.82069e-05	-0.52563	0.00211
84124	ZNF394	-1.21508	0.00143387	0.921981	0.00989342	-0.525331	0.0021
2937	GSS	0.545158	0.0299578	0.510086	0.018101	0.542678	0.0021
5281	PIGF	0.91767	0.000618	0.94605	0.000464155	0.606135	0.00209
6277	S100A6	0.937287	0.00154527	0.834621	0.00195216	0.702339	0.00209
80351	TNKS2	-1.26982	0.00017	-1.76491	4.9626e-06	-1.09444	0.00208
9710	KIAA0355	-1.99595	0.000172	-1.63366	0.000351536	-0.786362	0.00208
10464	PIBF1	-2.27132	0.000748	-2.08367	0.000749121	-0.605448	0.00208
84945	ABHD13	-0.81152	0.0125611	-1.09988	0.0012632	-1.14965	0.00207
7319	UBE2A	0.817341	0.00479293	0.679097	0.00398414	0.534389	0.00207
5884	RAD17	-1.6344	0.000159	-0.607617	0.0333306	-0.639732	0.00205
64343	AZI2	0.728113	0.0213102	2.18555	1.11707e-05	0.490417	0.00205
4696	NDUFA3	0.841572	0.000899	1.04237	0.000114761	0.603646	0.00205
23474	ETHE1	0.885843	0.0336839	1.46059	0.00124295	0.785503	0.00205
122616	CLBA1	0.78157	0.00234425	1.54836	1.36769e-05	0.825884	0.00205
7390	UROS	0.894095	0.00144552	1.84767	6.21059e-06	0.544877	0.00204
79144	PPDPF	0.844829	0.001349	1.86516	6.26764e-06	0.58427	0.00203
10260	DENND4A	-0.898639	0.0368844	-0.900464	0.0261223	-0.696901	0.00202
2187	FANCB	-1.33018	0.021231	-1.34028	0.0140303	-0.63019	0.00202
8440	NCK2	-0.717108	0.0136168	-0.752102	0.00692819	0.557963	0.00201
135114	HINT3	1.10616	0.000799	1.70032	2.358e-05	0.937656	0.00201
56943	ENY2	1.15713	0.00047	-3.55214	2.26296e-07	-0.79564	0.002
7428	VHL	0.775841	0.0080528	1.95673	1.07854e-05	0.569911	0.002
51150	SDF4	0.692458	0.00322539	0.722877	0.00538309	0.603996	0.002
23641	LDOC1	0.451418	0.0402051	0.462032	0.0258156	0.705992	0.002
1969	EPHA2	1.46861	0.000875	1.46575	0.000502011	0.75238	0.002
6645	SNTB2	-1.02233	0.00112691	-1.67435	2.23109e-05	-1.1127	0.00199
475	ATOX1	0.801183	0.00183819	0.699842	0.00262693	0.493657	0.00199
6549	SLC9A2	-1.16345	0.0418003	-1.52727	0.00695454	-0.72057	0.00198
55640	FLVCR2	-1.38996	0.000632	-1.96228	3.2828e-05	-1.18284	0.00197
29979	UBQLN1	-0.453075	0.0391998	-1.30872	3.35632e-05	-0.504005	0.00197
51719	CAB39	-0.736265	0.0039953	-0.709649	0.00311922	-0.796533	0.00196
22930	RAB3GAP1	-0.673015	0.00465856	-0.524366	0.0129058	-0.572651	0.00195
26227	PHGDH	0.90967	0.00115929	2.77008	5.31989e-07	0.575255	0.00195
11052	CPSF6	0.639169	0.0105553	1.07075	0.000237699	0.499237	0.00194
317762	CCDC85C	-1.53133	0.000324	-1.25033	0.000703374	-0.665101	0.00193
197131	UBR1	-1.7366	0.000239	-2.56098	9.21213e-06	-0.688468	0.00192
65258	MPPE1	0.93031	0.00460033	1.46587	0.000133174	0.515506	0.00192
26097	CHTOP	-0.847377	0.000853	-0.632933	0.00330382	-0.552476	0.00191
55778	ZNF839	-1.23256	0.00344504	-1.45996	0.000691777	-0.672496	0.0019
1965	EIF2S1	0.990351	0.000267	1.27458	2.49402e-05	-0.513634	0.0019
56965	PARP6	0.80417	0.00936443	1.41284	0.000146633	0.654906	0.0019
84186	ZCCHC7	-2.61707	3.93e-06	-1.81359	0.00265115	-0.832478	0.00189
57460	PPM1H	-2.5848	1.46e-05	-3.84036	6.68248e-07	-0.619504	0.00188
51182	HSPA14	-2.2414	0.000232	-2.55274	4.97417e-05	-0.49787	0.00188
2033	EP300	-0.972238	0.013791	-1.30389	0.00150975	-0.643857	0.00187
123	PLIN2	0.797544	0.00470835	1.47871	4.57043e-05	0.756842	0.00187
7004	TEAD4	-1.71573	6.15e-05	-1.34579	0.000153893	-0.586831	0.00186
26985	AP3M1	1.05753	0.0398503	-0.74776	0.027222	0.807171	0.00186
11188	NISCH	0.902015	0.0270687	1.22236	0.00277631	0.656631	0.00185
57711	ZNF529	-1.12821	0.00708718	-0.797071	0.030919	-1.41761	0.00184
92140	MTDH	-0.469351	0.0387374	-1.27602	4.95919e-05	-0.659289	0.00184
5530	PPP3CA	-0.839126	0.000726	-2.24038	6.93165e-07	-0.589319	0.00184
9831	ZNF623	-1.39493	0.000862	-1.06863	0.00284837	-0.55937	0.00184
387882	C12ORF75	0.446214	0.0472326	0.488859	0.0220019	0.559582	0.00184
2130	EWSR1	-1.06585	0.002573	-1.29132	0.000283741	-0.499074	0.00182
25798	BRI3	0.636916	0.0194443	1.6858	2.29096e-05	0.632458	0.00182
83637	ZMIZ2	0.561925	0.0154183	0.692749	0.0029541	0.978003	0.00182
84458	LCOR	-2.03384	1.28e-05	-2.68273	1.16259e-06	-1.20556	0.00181
140609	NEK7	-1.04419	0.000836	-1.67569	1.85473e-05	-0.640933	0.00181
56647	BCCIP	1.21033	0.000744	1.17975	0.000492862	0.685055	0.00181
79598	CEP97	-1.47595	0.00146524	-1.65863	0.000386329	-0.807813	0.0018
55669	MFN1	-1.13303	0.000357	-2.19228	5.83307e-06	-0.629023	0.0018
5170	PDPK1	-1.23538	8e-05	-0.40134	0.0423142	-0.599559	0.0018
5814	PURB	-0.918964	0.0144293	-0.783084	0.00469784	-0.737086	0.00179
29090	TIMM21	-0.467964	0.0317564	-0.515027	0.0135598	-0.623249	0.00179
10274	STAG1	-1.63131	2.66e-05	-2.60106	7.63518e-07	-0.58312	0.00179
23272	FAM208A	-1.18028	0.000564	-1.48976	6.21533e-05	-0.572101	0.00179
8087	FXR1	-0.884515	0.00117855	-0.805713	0.00453244	-0.555706	0.00179
8871	SYNJ2	-1.36287	0.0114589	-1.92731	0.000850518	-0.758525	0.00178
10265	IRX5	-1.36556	6.18e-05	-1.59284	1.07789e-05	-0.681069	0.00178
64598	MOSPD3	0.812429	0.00468881	1.09873	0.000396699	0.893508	0.00178
[truncated: 10,096 more rows]
